# Supplementary material for: Exploring the Transcriptome of Ciliated Cells Using In Silico Dissection of Human Tissues
Source: PubMed Central journal article supplement (PMC3338421; doi:10.1371/journal.pone.0035618), 2012-04-25
Supplement: pone.0035618.s009.pdf [file pone.0035618.s009.pdf]

# Analysis of protein localization

## Summary

| Symbol            | Airways             | Fallopian tubes | Staining Class                    |
|-------------------|---------------------|-----------------|-----------------------------------|
| <b>Category 1</b> |                     |                 |                                   |
| AGBL2             | Cilia and cytoplasm | Cilia           | (1) Staining is specific to cilia |
| AK7               | Cilia               | Cilia           | (1) Staining is specific to cilia |
| ANKRD45           | Cilia               | Cilia           | (1) Staining is specific to cilia |
| ARMC3             | Cilia               | Cilia           | (1) Staining is specific to cilia |
| ARMC4             | Cilia               | Cilia           | (1) Staining is specific to cilia |
| ARL6              | Cilia               | Cilia           | (1) Staining is specific to cilia |
| C1orf158          | Cilia               | Cilia           | (1) Staining is specific to cilia |
| C10orf63          | Cilia               | Cilia           | (1) Staining is specific to cilia |
| C20orf26          | Cilia               | Cilia           | (1) Staining is specific to cilia |
| C21orf59          | Cilia and cytoplasm | Cilia           | (1) Staining is specific to cilia |
| C3orf15           | Cilia and cytoplasm | Cilia           | (1) Staining is specific to cilia |
| C7orf57           | Cilia               | Cilia           | (1) Staining is specific to cilia |
| C7orf67           | Cilia               | Cilia           | (1) Staining is specific to cilia |
| C8orf47           | Cilia               | Cilia           | (1) Staining is specific to cilia |
| C9orf116          | Cilia               | Cilia           | (1) Staining is specific to cilia |
| C9orf117          | Cilia               | Cilia           | (1) Staining is specific to cilia |
| C9orf98           | Cilia               | Cilia           | (1) Staining is specific to cilia |
| CCDC104           | Cilia               | Cilia           | (1) Staining is specific to cilia |
| CCDC146           | Cilia and cytoplasm | Cilia           | (1) Staining is specific to cilia |
| CCDC147           | Cilia               | Cilia           | (1) Staining is specific to cilia |
| CCDC39            | Cilia               | Cilia           | (1) Staining is specific to cilia |
| CCDC40            | Cilia               | Cilia           | (1) Staining is specific to cilia |
| CETN2             | Cilia and cytoplasm | Cilia           | (1) Staining is specific to cilia |
| CYB5D1            | Cilia and cytoplasm | Cilia           | (1) Staining is specific to cilia |
| DCDC2             | Apical cytoplasm    | Cilia           | (1) Staining is specific to cilia |
| DLEC1             | Cilia               | Cilia           | (1) Staining is specific to cilia |
| DNAH5             | Cilia               | Cilia           | (1) Staining is specific to cilia |
| DNAH7             | Cilia               | Cilia           | (1) Staining is specific to cilia |
| DNAH9             | Cilia               | Cilia           | (1) Staining is specific to cilia |
| DNAH12            | Cilia               | Cilia           | (1) Staining is specific to cilia |
| DNAI1             | Cilia               | Cilia           | (1) Staining is specific to cilia |
| DNAI2             | Cilia               | Cilia           | (1) Staining is specific to cilia |
| DNALI1            | Cilia               | Cilia           | (1) Staining is specific to cilia |
| DYDC2             | Cilia               | Cilia           | (1) Staining is specific to cilia |
| EFCAB1            | Cilia               | Cilia           | (1) Staining is specific to cilia |
| EFCAB6            | Cilia               | Cilia           | (1) Staining is specific to cilia |
| EFHB              | Cilia               | Cilia           | (1) Staining is specific to cilia |
| EFHC1             | Cilia and cytoplasm | Cilia           | (1) Staining is specific to cilia |
| EFHC2             | Cilia               | Cilia           | (1) Staining is specific to cilia |
| FLJ23834          | Cilia               | Cilia           | (1) Staining is specific to cilia |

|          |                     |                     |                                                                                 |
|----------|---------------------|---------------------|---------------------------------------------------------------------------------|
| IQUB     | Apical cytoplasm    | Cilia               | (1) Staining is specific to cilia                                               |
| KIF9     | Cilia               | Cilia               | (1) Staining is specific to cilia                                               |
| LCA5     | Cilia               | Cilia               | (1) Staining is specific to cilia                                               |
| LRRC23   | Cilia               | Cilia               | (1) Staining is specific to cilia                                               |
| LRRC34   | Cilia               | Cilia               | (1) Staining is specific to cilia                                               |
| LRRC48   | Cilia               | Cilia               | (1) Staining is specific to cilia                                               |
| MAP6     | Cytoplasm           | Cilia               | (1) Staining is specific to cilia                                               |
| MDH1B    | Cilia               | Cilia               | (1) Staining is specific to cilia                                               |
| MLF1     | Cilia               | Cilia               | (1) Staining is specific to cilia                                               |
| MORN5    | Cilia               | Cilia               | (1) Staining is specific to cilia                                               |
| MS4A8B   | Cilia               | Cilia               | (1) Staining is specific to cilia                                               |
| PPIL6    | Cilia               | Cilia               | (1) Staining is specific to cilia                                               |
| PROM1    | Cilia               | Cilia               | (1) Staining is specific to cilia                                               |
| RIBC2    | Cilia               | Cilia               | (1) Staining is specific to cilia                                               |
| ROPN1L   | Cytoplasm           | Cilia               | (1) Staining is specific to cilia                                               |
| RPGR     | Cilia               | Cilia               | (1) Staining is specific to cilia                                               |
| RSPH1    | Cilia               | Cilia               | (1) Staining is specific to cilia                                               |
| RSPH4A   | Cilia               | Cilia               | (1) Staining is specific to cilia                                               |
| RSPH9    | Cilia               | Cilia               | (1) Staining is specific to cilia                                               |
| RTDR1    | Cilia               | Cilia               | (1) Staining is specific to cilia                                               |
| SPA17    | Cilia               | Cilia               | (1) Staining is specific to cilia                                               |
| SPAG6    | Cilia               | Cilia               | (1) Staining is specific to cilia                                               |
| SPATA17  | Cilia               | Cilia               | (1) Staining is specific to cilia                                               |
| SPEF2    | Cilia               | Cilia               | (1) Staining is specific to cilia                                               |
| SRGAP3   | Cytoplasm           | Cilia               | (1) Staining is specific to cilia                                               |
| STOML3   | Cilia               | Cilia               | (1) Staining is specific to cilia                                               |
| TCTEX1D1 | Cilia               | Cilia               | (1) Staining is specific to cilia                                               |
| TEKT2    | Cilia               | Cilia               | (1) Staining is specific to cilia                                               |
| TEX9     | Cilia               | Cilia               | (1) Staining is specific to cilia                                               |
| TTC18    | Cilia               | Cilia               | (1) Staining is specific to cilia                                               |
| TTC25    | Cilia               | Cilia               | (1) Staining is specific to cilia                                               |
| TTC26    | Apical cytoplasm    | Cilia               | (1) Staining is specific to cilia                                               |
| TTC29    | Cilia and cytoplasm | Cilia               | (1) Staining is specific to cilia                                               |
| WDR16    | Cilia               | Cilia               | (1) Staining is specific to cilia                                               |
| YSK4     | Cilia               | Cilia               | (1) Staining is specific to cilia                                               |
| ZBBX     | Cilia               | Cilia               | (1) Staining is specific to cilia                                               |
| AK1      | No staining         | Cilia and cytoplasm | (2) Staining is specific to ciliated cells (cilia and cytoplasm)                |
| B9D1     | Apical cytoplasm    | Apical cytoplasm    | (2) Staining is specific to ciliated cells (apical region of cytoplasm)         |
| C1orf102 | Cytoplasm           | Cytoplasm           | (2) Staining is specific to ciliated cells (cytoplasm)                          |
| C11orf60 | Apical cytoplasm    | Apical cytoplasm    | (2) Staining is specific to ciliated cells (apical region of cytoplasm)         |
| C13orf30 | Apical cytoplasm    | Apical cytoplasm    | (2) Staining is specific to ciliated cells (apical region of cytoplasm)         |
| C6orf118 | Cytoplasm           | Apical cytoplasm    | (2) Staining is specific to ciliated cells (uncertain subcellular localization) |
| C9orf135 | Cytoplasm           | Apical cytoplasm    | (2) Staining is specific to ciliated cells (uncertain subcellular localization) |
| C2CD3    | Apical cytoplasm    | Apical cytoplasm    | (2) Staining is specific to ciliated cells (apical cytoplasm)                   |
| CCDC41   | Apical cytoplasm    | Apical cytoplasm    | (2) Staining is specific to ciliated cells (apical region of cytoplasm)         |
| CDS1     | Cytoplasm           | Cytoplasm           | (2) Staining is specific to ciliated cells (cytoplasm)                          |
| CEP97    | Apical cytoplasm    | Apical cytoplasm    | (2) Staining is specific to ciliated cells (apical region of cytoplasm)         |

|          |                        |                        |                                                                                   |
|----------|------------------------|------------------------|-----------------------------------------------------------------------------------|
| CLGN     | Cytoplasm              | Cytoplasm              | (2) Staining is specific to ciliated cells (cytoplasm)                            |
| CLUAP1   | Apical cytoplasm       | Apical cytoplasm       | (2) Staining is specific to ciliated cells (apical region of cytoplasm)           |
| DPCD     | Cytoplasm              | Cytoplasm              | (2) Staining is specific to ciliated cells (cytoplasm)                            |
| DZIP1L   | Cilia and nucleus      | Cilia and nucleus      | (2) Staining is specific to ciliated cells (cilia and nucleus)                    |
| FOXJ1    | Nucleus                | Nucleus                | (2) Staining is specific to ciliated cells (nucleus)                              |
| HSP90AA1 | Cytoplasm              | Cytoplasm              | (2) Staining is specific to ciliated cells (cytoplasm)                            |
| HSPB11   | Cilia & apical cytopl. | Cilia & apical cytopl. | (2) Staining is specific to ciliated cells (cilia and apical cytoplasm)           |
| MAK      | Cilia and cytoplasm    | Cilia and cytoplasm    | (2) Staining is specific to ciliated cells (cilia and cytoplasm)                  |
| MAP9     | Apical cytoplasm       | Apical cytoplasm       | (2) Staining is specific to ciliated cells (apical cytoplasm)                     |
| PTGES3   | Cytoplasm              | Cytoplasm              | (2) Staining is specific to ciliated cells (cytoplasm)                            |
| RFX3     | Nucleus                | Nucleus                | (2) Staining is specific to ciliated cells (nucleus)                              |
| SCGB2A1  | Cytoplasm              | Cilia and cytoplasm    | (2) Staining is specific to ciliated cells (uncertain subcellular localization)   |
| SLC22A4  | Cilia and cytoplasm    | Cilia and cytoplasm    | (2) Staining is specific to ciliated cells (cilia and cytoplasm)                  |
| SLC27A2  | Cilia and cytoplasm    | Cytoplasm              | (2) Staining is specific to ciliated cells (uncertain subcellular localization)   |
| SPAG16   | Cytoplasm              | Cytoplasm              | (2) Staining is specific to ciliated cells (cytoplasm)                            |
| SPATA6   | Apical cytoplasm       | Apical cytoplasm       | (2) Staining is specific to ciliated cells (apical region of cytoplasm)           |
| STK33    | Apical cytoplasm       | Cytoplasm              | (2) Staining is specific to ciliated cells (uncertain subcellular localization)   |
| TMEM67   | Apical cytoplasm       | Apical cytoplasm       | (2) Staining is specific to ciliated cells (apical region of cytoplasm)           |
| TRAF3IP1 | Apical cytoplasm       | Apical cytoplasm       | (2) Staining is specific to ciliated cells (apical region of cytoplasm)           |
| TSGA10   | Apical cytoplasm       | Apical cytoplasm       | (2) Staining is specific to ciliated cells (apical region of cytoplasm)           |
| TTL6     | Apical cytoplasm       | Apical cytoplasm       | (2) Staining is specific to ciliated cells (apical region of cytoplasm)           |
| VWA3B    | Nucleus & apical cyto  | Nucleus & apical cyto  | (2) Staining is specific to ciliated cells (nucleus & apical region of cytoplasm) |
| ZNF474   | Apical cytoplasm       | Apical cytoplasm       | (2) Staining is specific to ciliated cells (apical region of cytoplasm)           |
| CAT      | Non-specific           | Non-specific           | (3) Staining is non-specific to ciliated cells or absent                          |
| CCDC17   | Cytoplasm              | Non-specific           | (3) Staining is non-specific to ciliated cells or absent                          |
| CCDC65   | Cilia and cytoplasm    | Non-specific           | (3) Staining is non-specific to ciliated cells or absent                          |
| C14orf45 | Cytoplasm              | Non-specific           | (3) Staining is non-specific to ciliated cells or absent                          |
| C14orf50 | Cytoplasm              | Non-specific           | (3) Staining is non-specific to ciliated cells or absent                          |
| C2orf40  | Non-specific           | Non-specific           | (3) Staining is non-specific to ciliated cells or absent                          |
| CHST9    | Non-specific           | Non-specific           | (3) Staining is non-specific to ciliated cells or absent                          |
| DNAJA4   | Cytoplasm              | Non-specific           | (3) Staining is non-specific to ciliated cells or absent                          |
| GMPR     | Cytoplasm              | Non-specific           | (3) Staining is non-specific to ciliated cells or absent                          |
| HKDC1    | Non-specific           | Non-specific           | (3) Staining is non-specific to ciliated cells or absent                          |
| IK       | Cytoplasm              | Non-specific           | (3) Staining is non-specific to ciliated cells or absent                          |
| IQCH     | Non-specific           | Non-specific           | (3) Staining is non-specific to ciliated cells or absent                          |
| KIF21A   | Non-specific           | Non-specific           | (3) Staining is non-specific to ciliated cells or absent                          |
| LRRC46   | Cytoplasm              | Non-specific           | (3) Staining is non-specific to ciliated cells or absent                          |
| MYB      | Non-specific           | Non-specific           | (3) Staining is non-specific to ciliated cells or absent                          |
| NME7     | Cytoplasm              | Non-specific           | (3) Staining is non-specific to ciliated cells or absent                          |
| NSUN7    | Cytoplasm              | Non-specific           | (3) Staining is non-specific to ciliated cells or absent                          |
| PECR     | Non-specific           | Non-specific           | (3) Staining is non-specific to ciliated cells or absent                          |
| PTPRT    | Cytoplasm              | Non-specific           | (3) Staining is non-specific to ciliated cells or absent                          |
| RAGE     | Cytoplasm              | Non-specific           | (3) Staining is non-specific to ciliated cells or absent                          |
| RIBC1    | Cytoplasm              | Non-specific           | (3) Staining is non-specific to ciliated cells or absent                          |
| SERPINI2 | Cytoplasm              | Non-specific           | (3) Staining is non-specific to ciliated cells or absent                          |
| TMEM190  | Non-specific           | Non-specific           | (3) Staining is non-specific to ciliated cells or absent                          |
| TTC21A   | Non-specific           | Non-specific           | (3) Staining is non-specific to ciliated cells or absent                          |

|                   |                     |                     |                                                                                 |
|-------------------|---------------------|---------------------|---------------------------------------------------------------------------------|
| WDR63             | Non-specific        | Non-specific        | (3) Staining is non-specific to ciliated cells or absent                        |
| ZMYND10           | Cytoplasm           | Non-specific        | (3) Staining is non-specific to ciliated cells or absent                        |
| <b>Category 2</b> |                     |                     |                                                                                 |
| C1orf87           | Cilia               | Cilia               | (1) Staining is specific to cilia                                               |
| C1orf222          | Cilia               | Cilia               | (1) Staining is specific to cilia                                               |
| C11orf66          | Cilia               | Cilia               | (1) Staining is specific to cilia                                               |
| C14orf179         | Cilia               | Cilia               | (1) Staining is specific to cilia                                               |
| C9orf9            | Cilia               | Cilia               | (1) Staining is specific to cilia                                               |
| DZIP3             | Cilia               | Cilia               | (1) Staining is specific to cilia                                               |
| FSD1L             | Cilia               | Cilia               | (1) Staining is specific to cilia                                               |
| KCNRG             | Cilia               | Cilia               | (1) Staining is specific to cilia                                               |
| LRP2BP            | Cilia               | Cilia               | (1) Staining is specific to cilia                                               |
| MIPEP             | Cilia               | Cilia               | (1) Staining is specific to cilia                                               |
| PLCH1             | Cilia and cytoplasm | Cilia               | (1) Staining is specific to cilia                                               |
| SPAG17            | Cilia               | Cilia               | (1) Staining is specific to cilia                                               |
| UBXN10            | Cilia and cytoplasm | Cilia               | (1) Staining is specific to cilia                                               |
| C6orf103          | Apical cytoplasm    | Cytoplasm           | (2) Staining is specific to ciliated cells (uncertain subcellular localization) |
| FANK1             | Cilia and cytoplasm | Cilia and cytoplasm | (2) Staining is specific to ciliated cells (cilia and cytoplasm)                |
| LRRC6             | Cilia and cytoplasm | Cytoplasm           | (2) Staining is specific to ciliated cells (uncertain subcellular localization) |
| NEK10             | Cytoplasm           | Apical cytoplasm    | (2) Staining is specific to ciliated cells (uncertain subcellular localization) |
| PPP1R16A          | Apical cytoplasm    | Apical cytoplasm    | (2) Staining is specific to ciliated cells (apical cytoplasm)                   |
| RBKS              | Cilia and cytoplasm | Cilia and cytoplasm | (2) Staining is specific to ciliated cells (cilia and cytoplasm)                |
| SPATA18           | Apical cytoplasm    | Apical cytoplasm    | (2) Staining is specific to ciliated cells (apical cytoplasm)                   |
| WDR49             | Apical cytoplasm    | Apical cytoplasm    | (2) Staining is specific to ciliated cells (apical cytoplasm)                   |
| APOBEC4           | Apical cytoplasm    | Non-specific        | (3) Staining is non-specific to ciliated cells or absent                        |
| C3orf25           | Cytoplasm           | Non-specific        | (3) Staining is non-specific to ciliated cells or absent                        |
| CCDC60            | Non-specific        | Non-specific        | (3) Staining is non-specific to ciliated cells or absent                        |
| FAM179A           | Cytoplasm           | Non-specific        | (3) Staining is non-specific to ciliated cells or absent                        |
| KIAA1377          | Cytoplasm           | Non-specific        | (3) Staining is non-specific to ciliated cells or absent                        |
| KLHDC9            | Cilia and cytoplasm | Non-specific        | (3) Staining is non-specific to ciliated cells or absent                        |
| NEK11             | Non-specific        | Non-specific        | (3) Staining is non-specific to ciliated cells or absent                        |
| SLFN13            | Non-specific        | Non-specific        | (3) Staining is non-specific to ciliated cells or absent                        |
| SPATA4            | Cytoplasm           | Non-specific        | (3) Staining is non-specific to ciliated cells or absent                        |
| STOX1             | Cytoplasm           | Non-specific        | (3) Staining is non-specific to ciliated cells or absent                        |
| TMEM17            | Non-specific        | Non-specific        | (3) Staining is non-specific to ciliated cells or absent                        |
| WDR31             | Cytoplasm           | Non-specific        | (3) Staining is non-specific to ciliated cells or absent                        |
| ZNF20             | Cytoplasm           | Non-specific        | (3) Staining is non-specific to ciliated cells or absent                        |
| <b>Category 3</b> |                     |                     |                                                                                 |
| ARMC2             | Cilia and cytoplasm | Cilia               | (1) Staining is specific to cilia                                               |
| BAIAP3            | Cilia and cytoplasm | Cilia               | (1) Staining is specific to cilia                                               |
| C1orf92           | Cilia and cytoplasm | Cilia               | (1) Staining is specific to cilia                                               |
| C10orf92          | Cilia               | Cilia               | (1) Staining is specific to cilia                                               |
| C11orf63          | Cilia               | Cilia               | (1) Staining is specific to cilia                                               |
| C21orf58          | Apical cytoplasm    | Cilia               | (1) Staining is specific to cilia                                               |
| C22orf23          | Cilia               | Cilia               | (1) Staining is specific to cilia                                               |
| CCDC89            | Cilia               | Cilia               | (1) Staining is specific to cilia                                               |
| CIB1              | Cilia               | Apical cytoplasm    | (1) Staining is specific to cilia                                               |

|          |                     |                     |                                                                                 |
|----------|---------------------|---------------------|---------------------------------------------------------------------------------|
| IQCK     | Cilia               | Cilia               | (1) Staining is specific to cilia                                               |
| KIAA0319 | Cilia               | Cilia               | (1) Staining is specific to cilia                                               |
| LPAR3    | Cilia               | Cilia               | (1) Staining is specific to cilia                                               |
| LRGUK    | Cilia               | Cilia               | (1) Staining is specific to cilia                                               |
| LRRC18   | Cilia               | Cilia               | (1) Staining is specific to cilia                                               |
| LRRIQ3   | Apical cytoplasm    | Cilia               | (1) Staining is specific to cilia                                               |
| NUP62CL  | Cilia and cytoplasm | Cilia               | (1) Staining is specific to cilia                                               |
| PPM1E    | Cilia               | Cilia               | (1) Staining is specific to cilia                                               |
| RBM20    | Cilia               | Cilia               | (1) Staining is specific to cilia                                               |
| RGS22    | Cytoplasm           | Cilia               | (1) Staining is specific to cilia                                               |
| UFC1     | Cytoplasm and cilia | Cilia               | (1) Staining is specific to cilia                                               |
| ACYP1    | Apical cytoplasm    | Cilia and cytoplasm | (2) Staining is specific to ciliated cells (uncertain subcellular localization) |
| C1orf129 | Apical cytoplasm    | Apical cytoplasm    | (2) Staining is specific to ciliated cells (apical cytoplasm)                   |
| DCDC5    | Apical cytoplasm    | Apical cytoplasm    | (2) Staining is specific to ciliated cells (apical cytoplasm)                   |
| FLJ16686 | Apical cytoplasm    | Apical cytoplasm    | (2) Staining is specific to ciliated cells (apical cytoplasm)                   |
| SYTL3    | Apical cytoplasm    | Apical cytoplasm    | (2) Staining is specific to ciliated cells (apical cytoplasm)                   |
| ALS2CR12 | Non-specific        | Non-specific        | (3) Staining is non-specific to ciliated cells or absent                        |
| ANKFN1   | Cytoplasm           | Non-specific        | (3) Staining is non-specific to ciliated cells or absent                        |
| CCDC67   | Cytoplasm           | Non-specific        | (3) Staining is non-specific to ciliated cells or absent                        |
| C9orf103 | Non-specific        | Non-specific        | (3) Staining is non-specific to ciliated cells or absent                        |
| C10orf57 | Non-specific        | Non-specific        | (3) Staining is non-specific to ciliated cells or absent                        |
| FABP6    | Non-specific        | Non-specific        | (3) Staining is non-specific to ciliated cells or absent                        |
| FAM174A  | Non-specific        | Non-specific        | (3) Staining is non-specific to ciliated cells or absent                        |
| GLT8D1   | Cytoplasm           | Non-specific        | (3) Staining is non-specific to ciliated cells or absent                        |
| GRAMD2   | Non-specific        | Non-specific        | (3) Staining is non-specific to ciliated cells or absent                        |
| IL5RA    | Cytoplasm           | Non-specific        | (3) Staining is non-specific to ciliated cells or absent                        |
| KCNMB2   | Non-specific        | Non-specific        | (3) Staining is non-specific to ciliated cells or absent                        |
| KIAA0556 | Non-specific        | Non-specific        | (3) Staining is non-specific to ciliated cells or absent                        |
| LCA5L    | Non-specific        | Non-specific        | (3) Staining is non-specific to ciliated cells or absent                        |
| MARCH10  | Non-specific        | Non-specific        | (3) Staining is non-specific to ciliated cells or absent                        |
| NELL2    | Non-specific        | Non-specific        | (3) Staining is non-specific to ciliated cells or absent                        |
| PERP     | Non-specific        | Non-specific        | (3) Staining is non-specific to ciliated cells or absent                        |
| SNCAIP   | Cytoplasm           | Non-specific        | (3) Staining is non-specific to ciliated cells or absent                        |
| TIGD4    | Non-specific        | Non-specific        | (3) Staining is non-specific to ciliated cells or absent                        |
| TMEM146  | Non-specific        | Non-specific        | (3) Staining is non-specific to ciliated cells or absent                        |
| TSPAN6   | Cytoplasm           | Non-specific        | (3) Staining is non-specific to ciliated cells or absent                        |
| ULK4     | Non-specific        | Non-specific        | (3) Staining is non-specific to ciliated cells or absent                        |
| WRB      | Non-specific        | Non-specific        | (3) Staining is non-specific to ciliated cells or absent                        |
| XK       | Non-specific        | Non-specific        | (3) Staining is non-specific to ciliated cells or absent                        |

**Airway images marked with an asterisk (below) were taken from nasopharynx.  
The rest of the airway images were taken from bronchus.**

## **Category 1**

(genes with strong evidence  
for ciliary function from the *literature*)

Coverage: 136 proteins were available in Protein Atlas  
from the total of 237 proteins in the category

| Protein                                                     | Airways                                                                             | Fallopian tubes                                                                      | Summary                                             |
|-------------------------------------------------------------|-------------------------------------------------------------------------------------|--------------------------------------------------------------------------------------|-----------------------------------------------------|
| <p>AGBL2<br/>(antibody<br/>HPA007718)</p> <p>Category 1</p> | 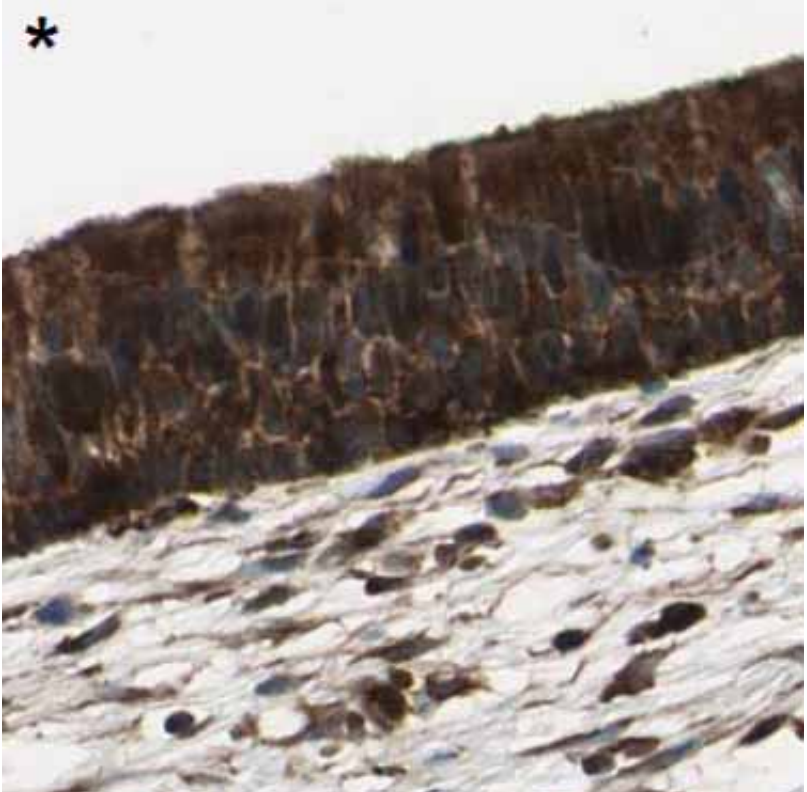  |   | <p>Staining is<br/>specific to<br/><i>cilia</i></p> |
| <p>AK7<br/>(antibody<br/>HPA003543)</p> <p>Category 1</p>   |  |  | <p>Staining is<br/>specific to<br/><i>cilia</i></p> |

ANKRD45  
(antibody  
HPA031657)

Category 1

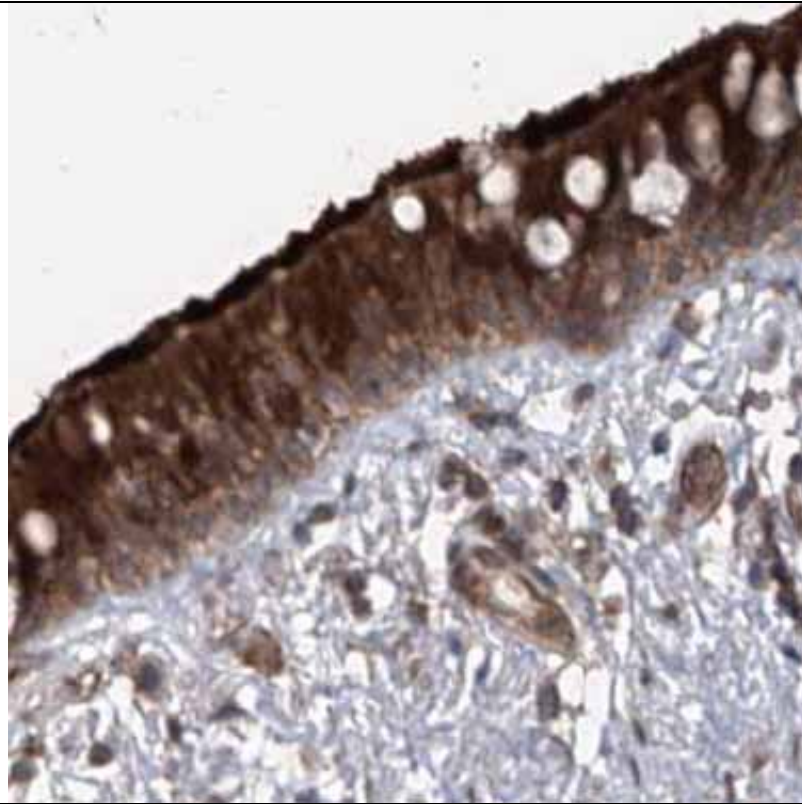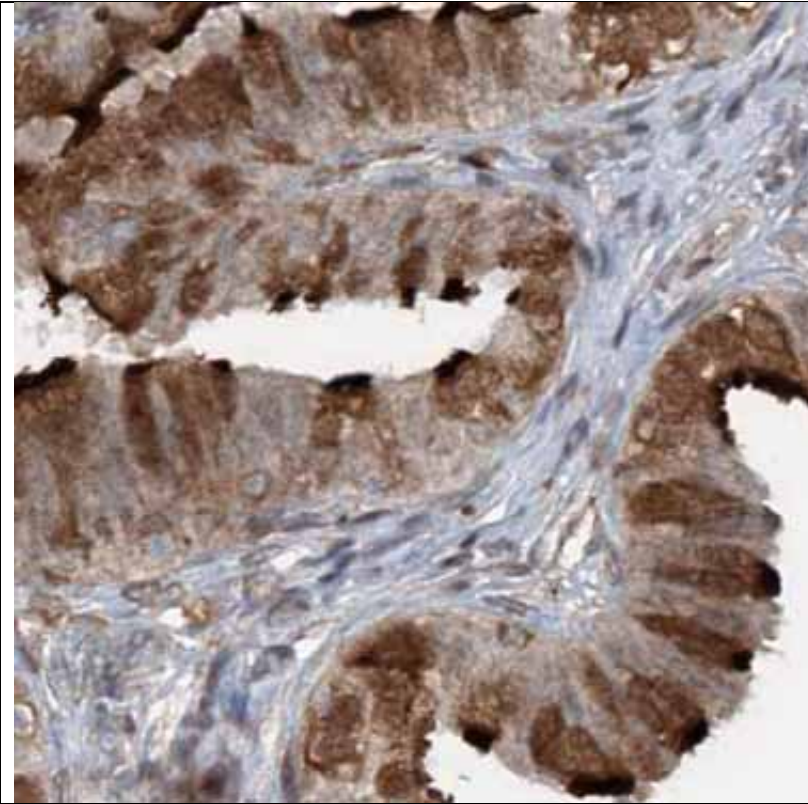

Staining is  
specific to  
*cilia*

ARMC3  
(antibody  
HPA037824)

Category 1

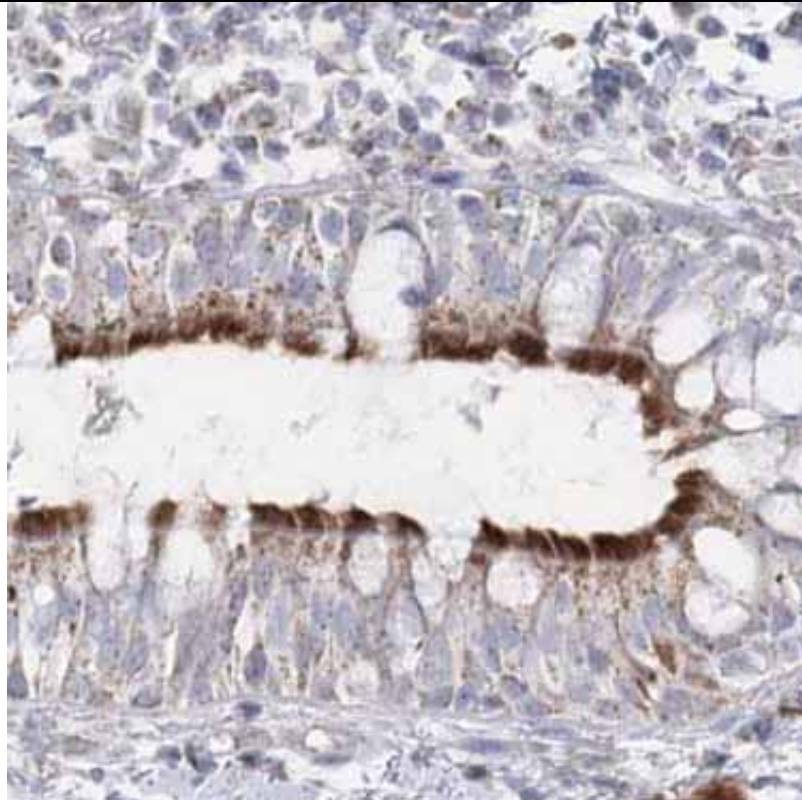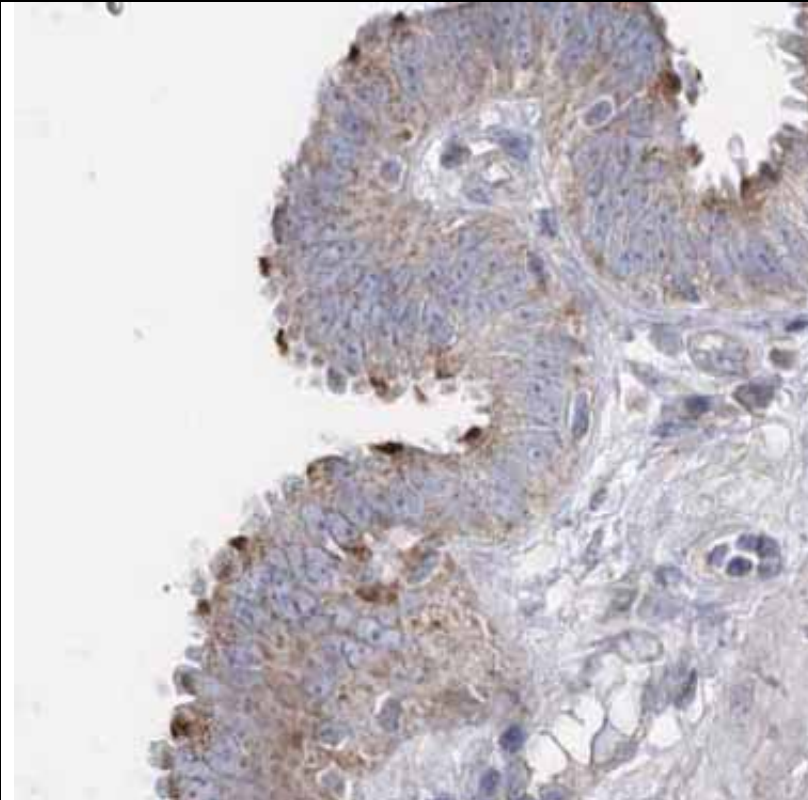

Staining is  
specific to  
*cilia*



ARMC4  
(antibody  
HPA037829)

Category 1

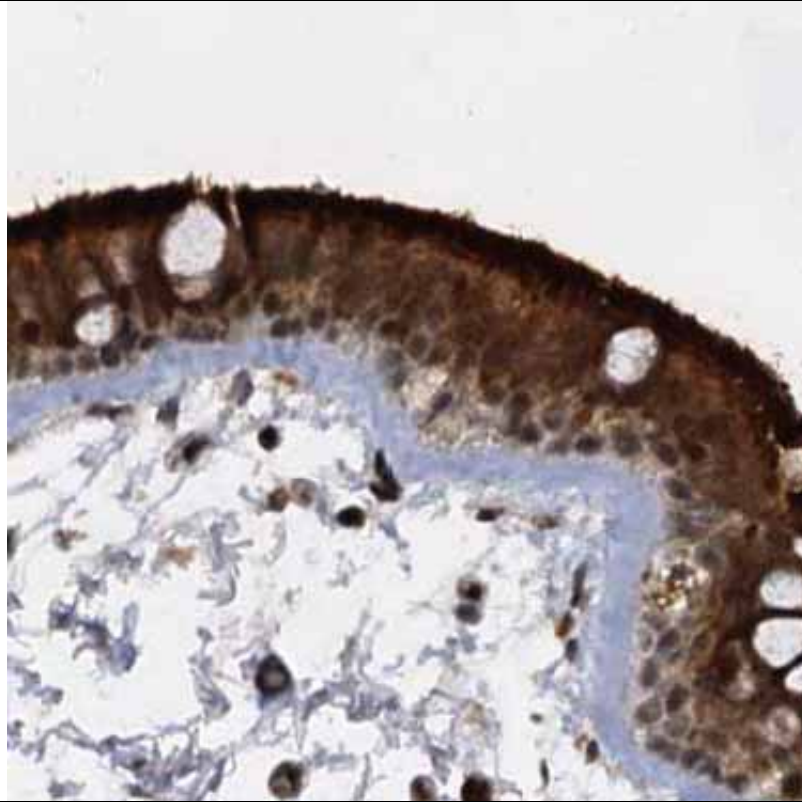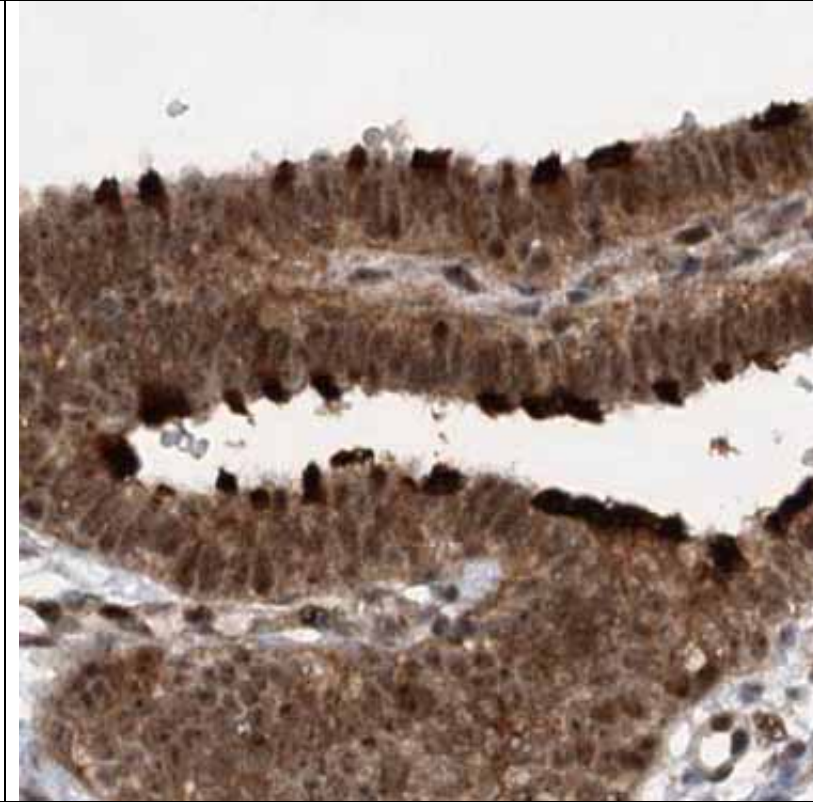

Staining is  
specific to  
*cilia*

ARL6  
(antibody  
HPA019361)

Category 1

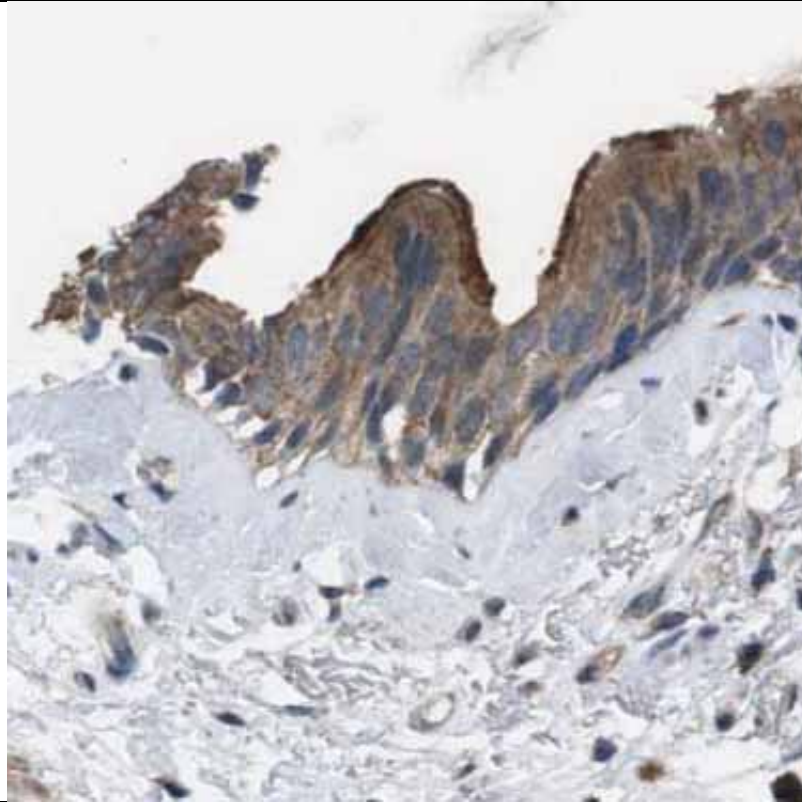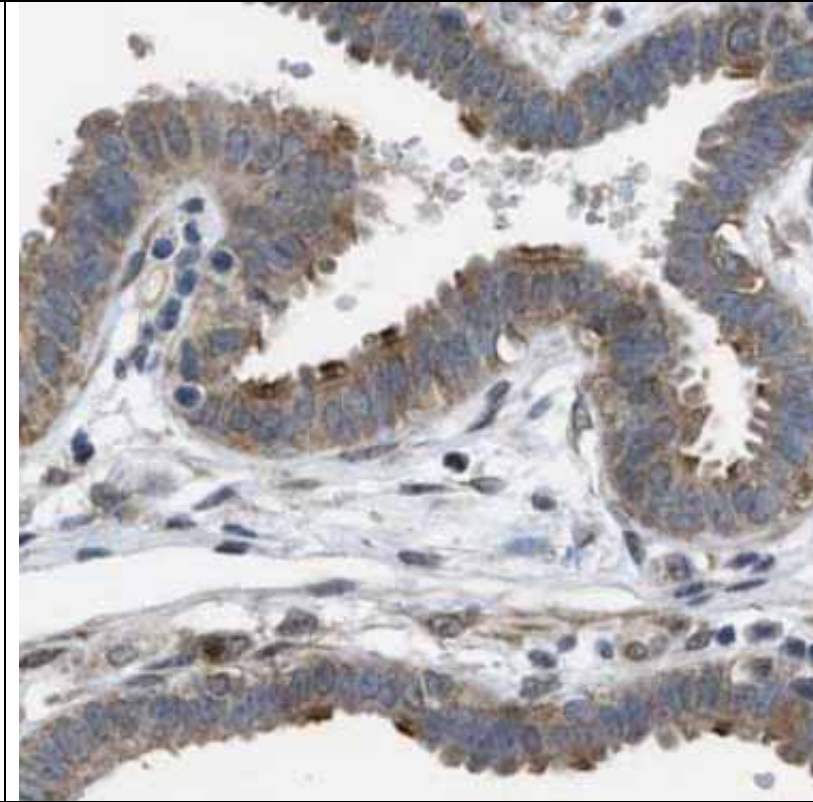

Staining is  
specific to  
*cilia*

C1orf158  
(antibody  
HPA028396)

Category 1

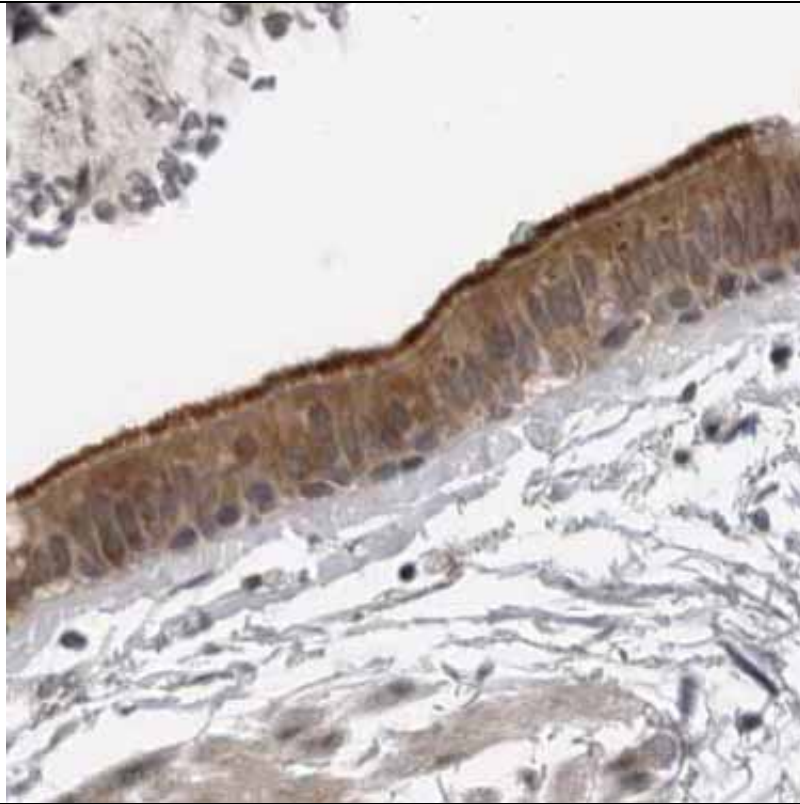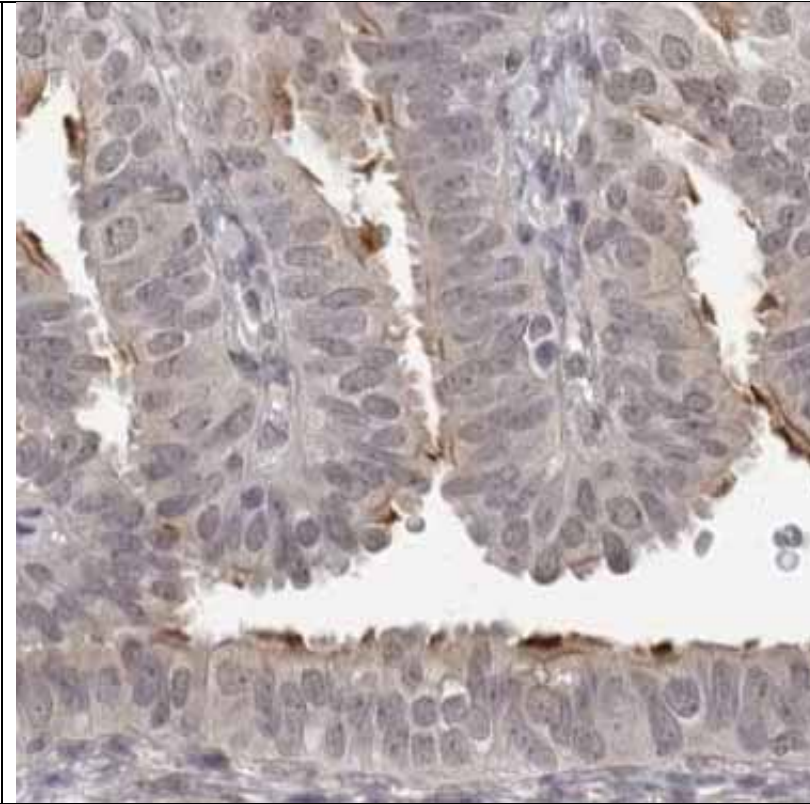

Staining is  
specific to  
*cilia*

C10orf63  
(antibody  
HPA037593)

Category 1

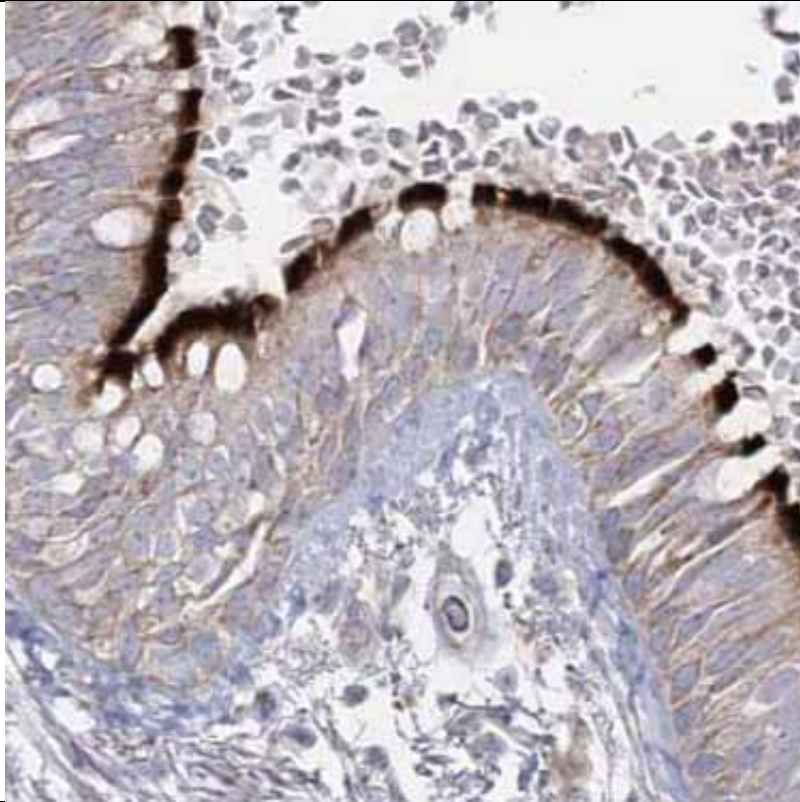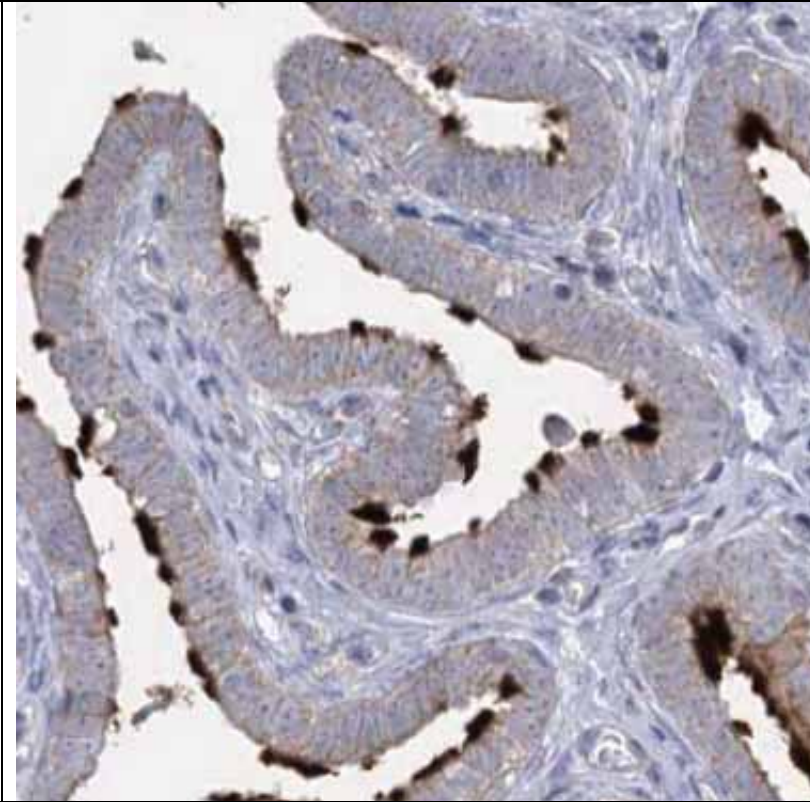

Staining is  
specific to  
*cilia*

C20orf26  
(antibody  
HPA009079)

Category 1

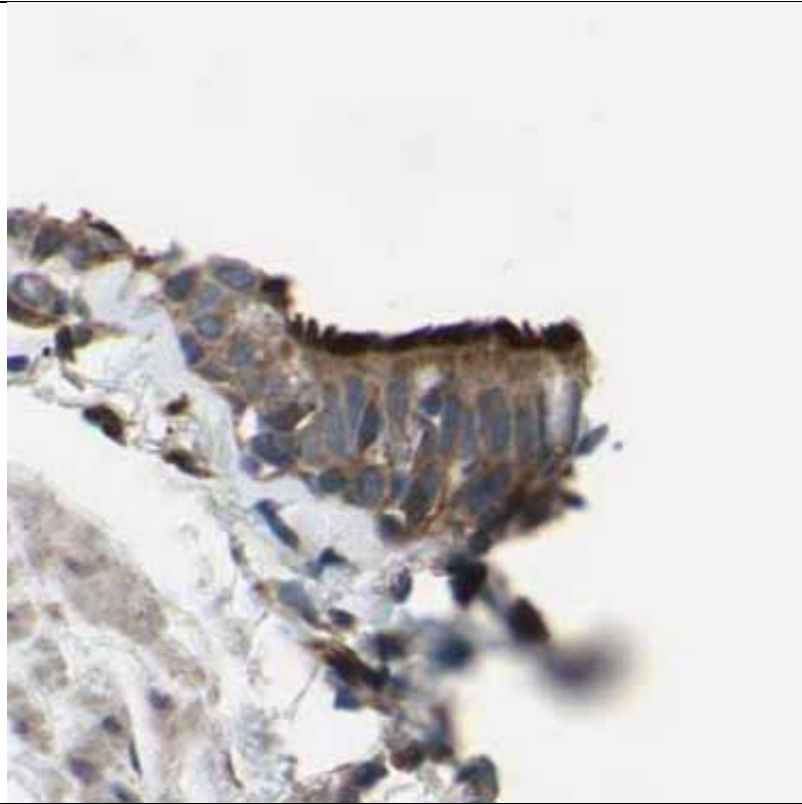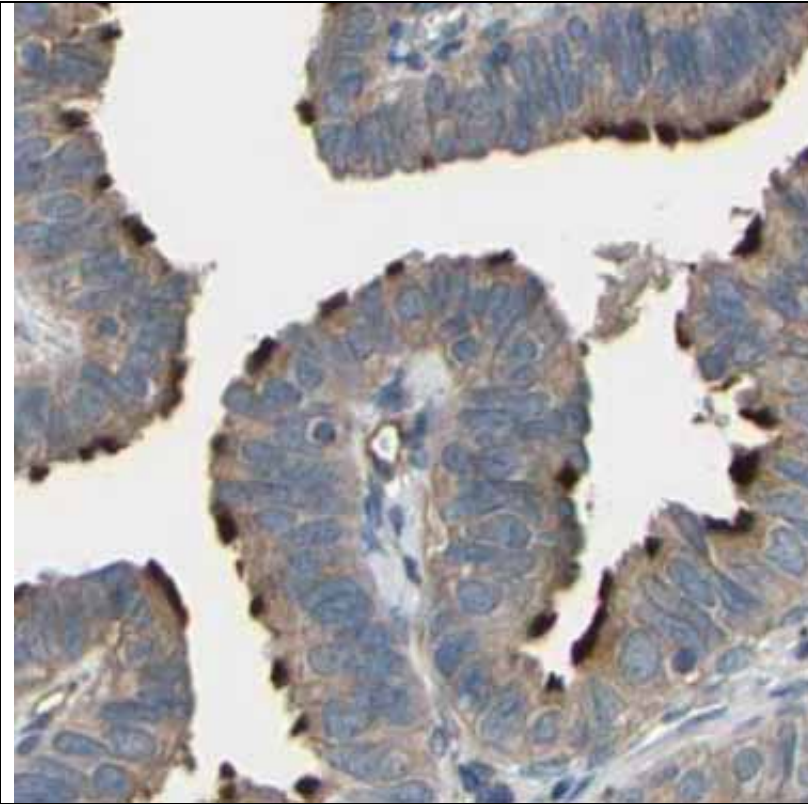

Staining is  
specific to  
*cilia*

C21orf59  
(antibody  
HPA028849)

Category 1

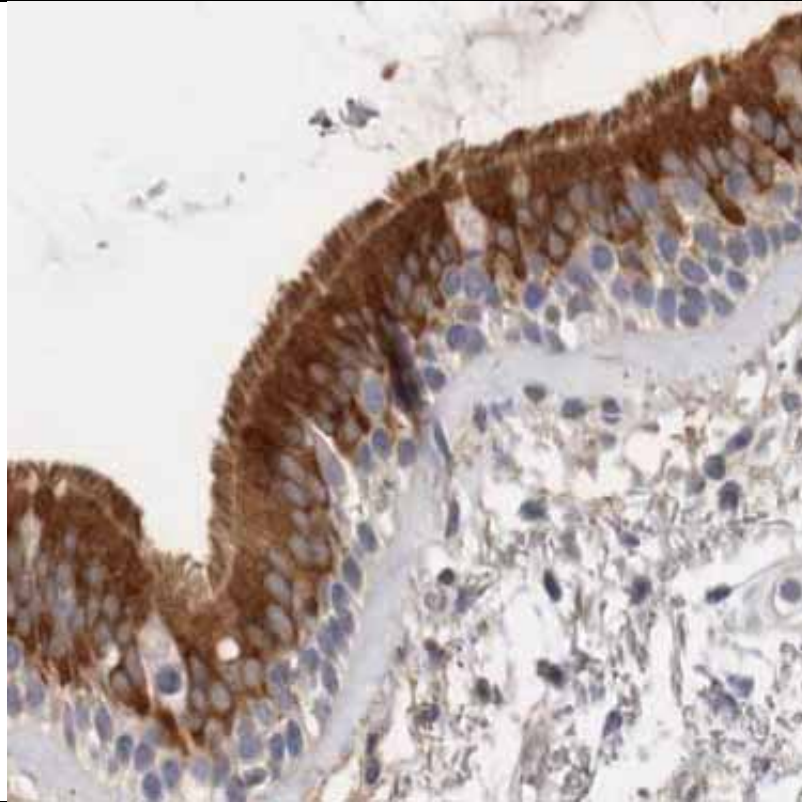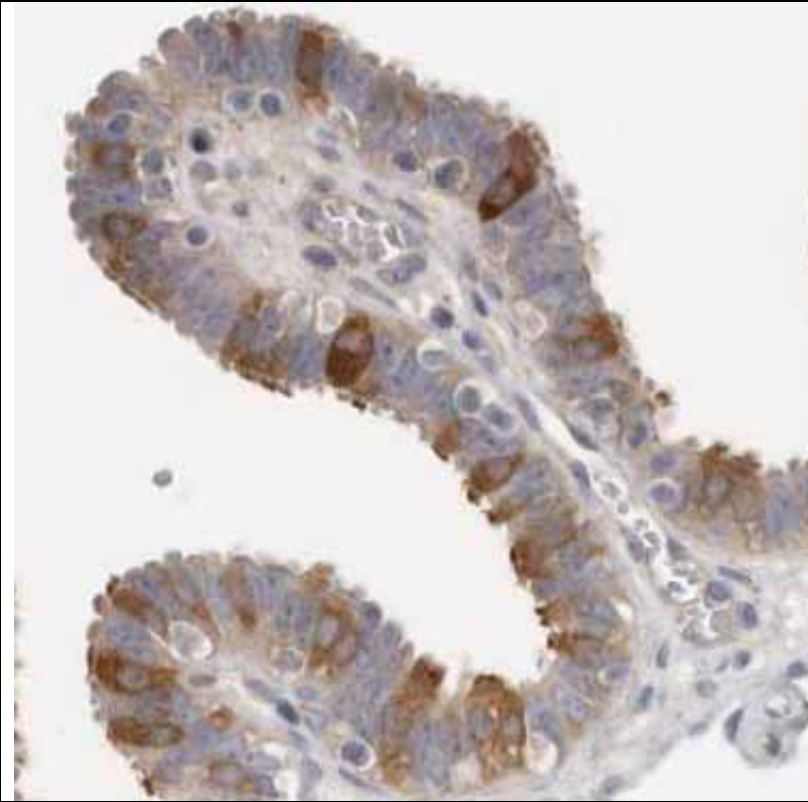

Staining is  
specific to  
*cilia*

C3orf15  
(antibody  
HPA035610)

Category 1

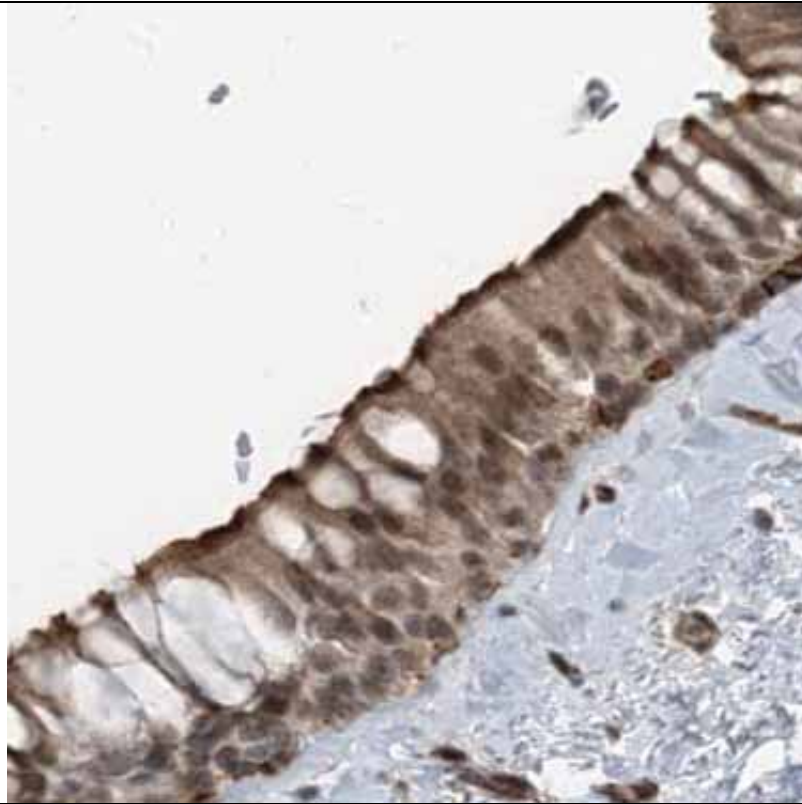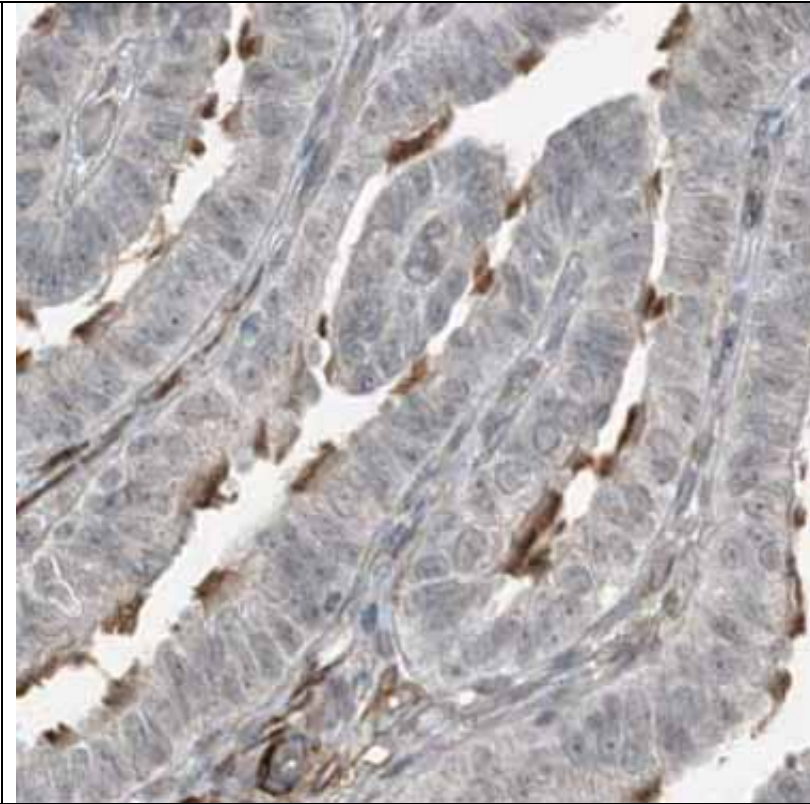

Staining is  
specific to  
*cilia*

C7orf57  
(antibody  
HPA021286)

Category 1

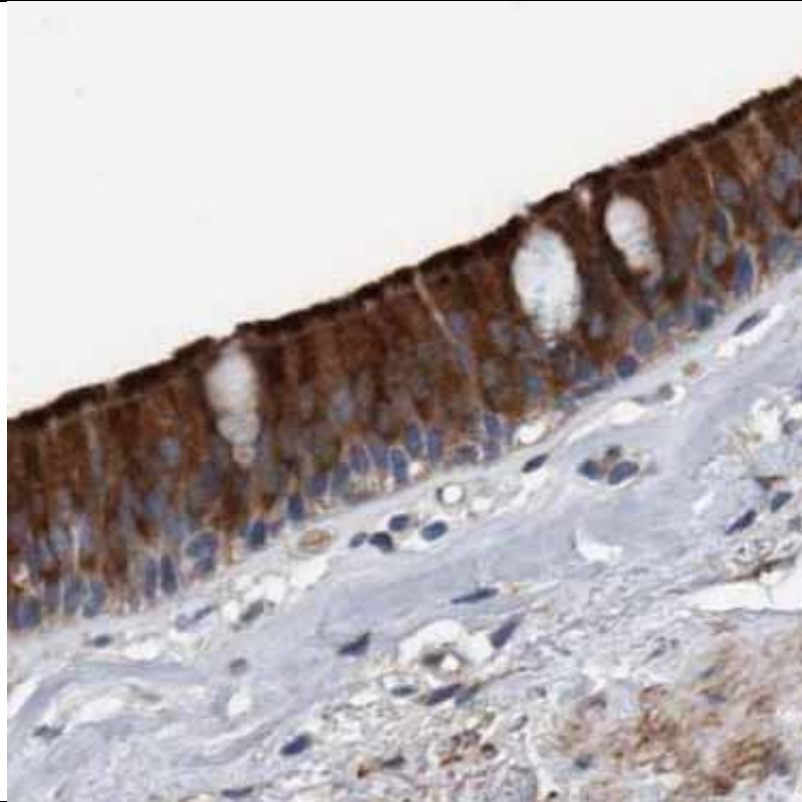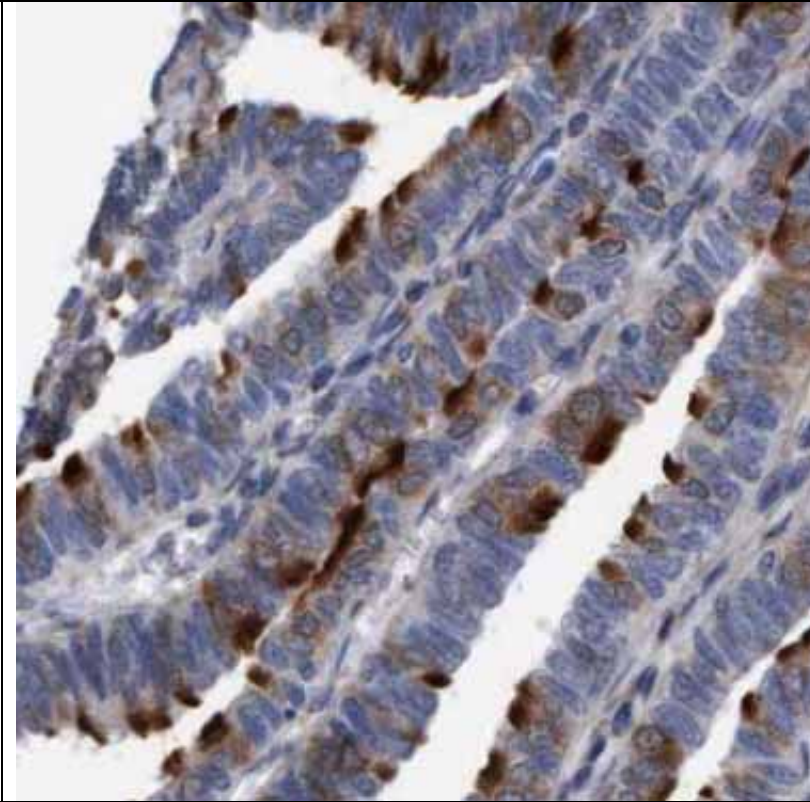

Staining is  
specific to  
*cilia*

C7orf67  
(antibody  
HPA030130)

Category 1

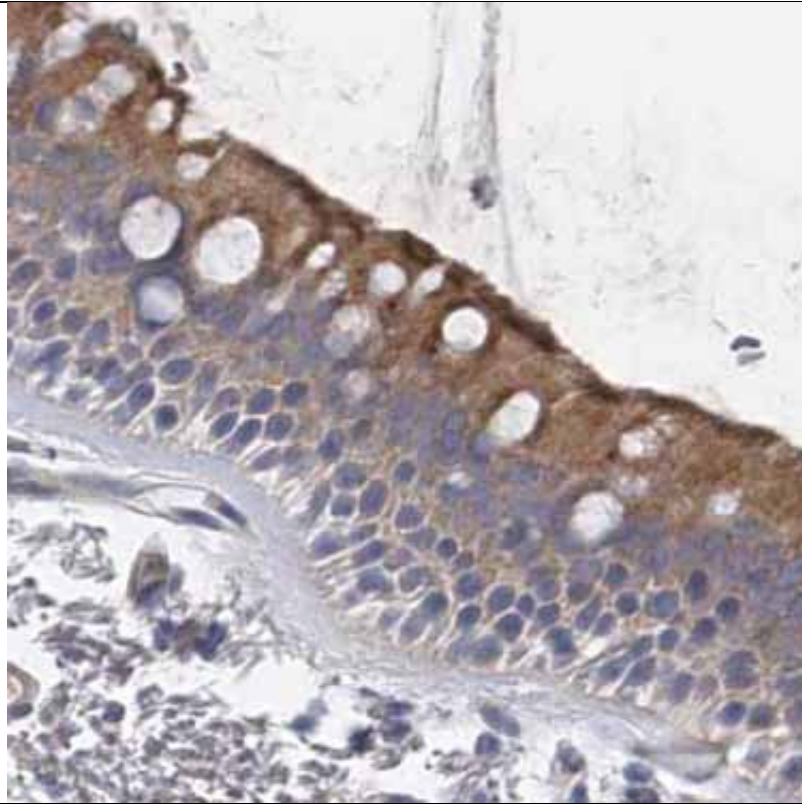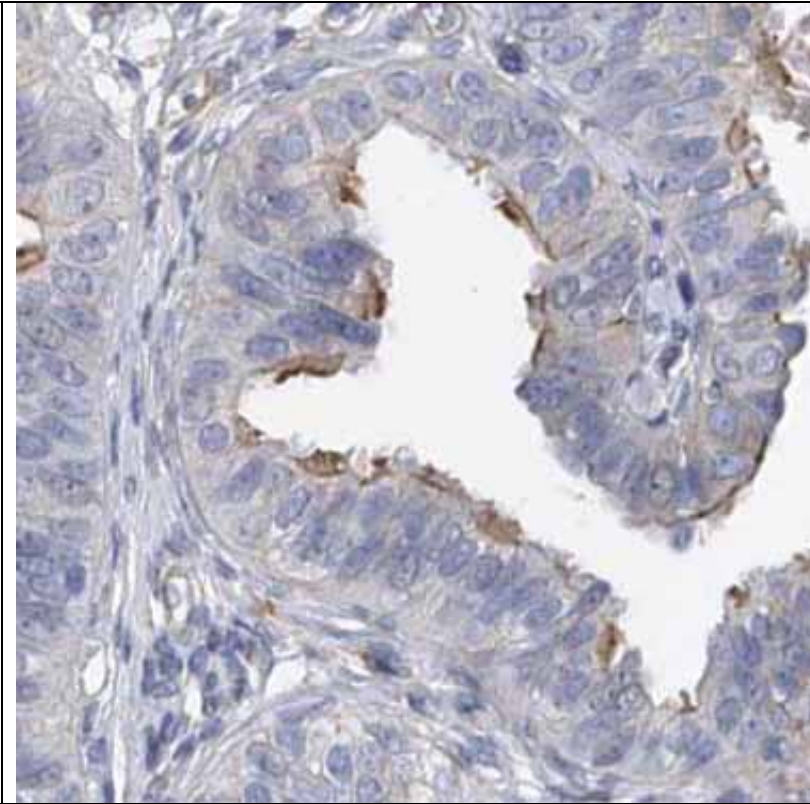

Staining is  
specific to  
*cilia*

C8orf47  
(antibody  
HPA025070)

Category 1

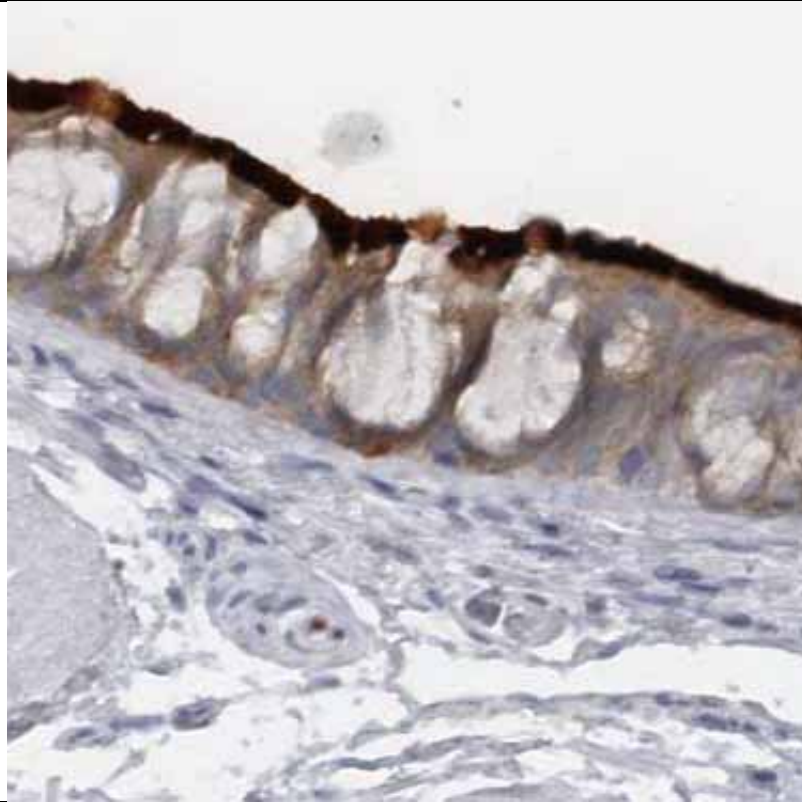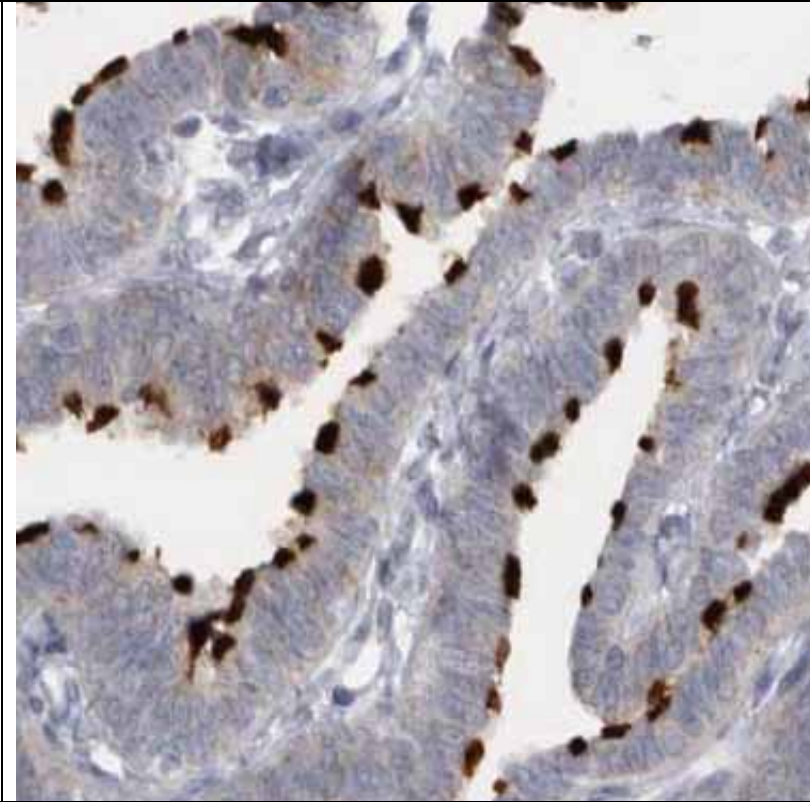

Staining is  
specific to  
*cilia*

C9orf116  
(antibody  
HPA021439)

Category 1

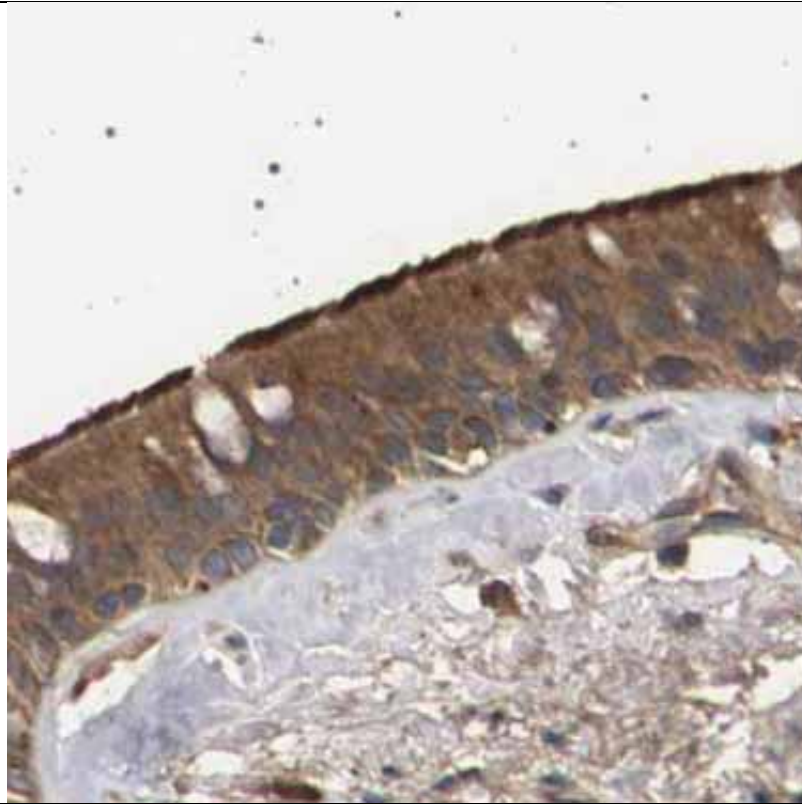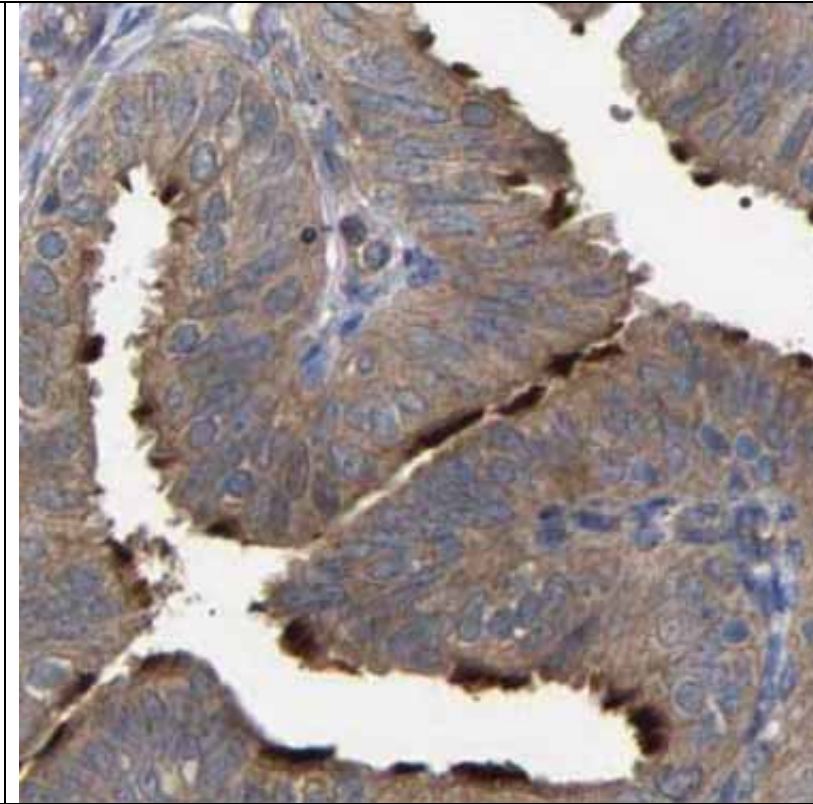

Staining is  
specific to  
*cilia*

C9orf117  
(antibody  
HPA021786)

Category 1

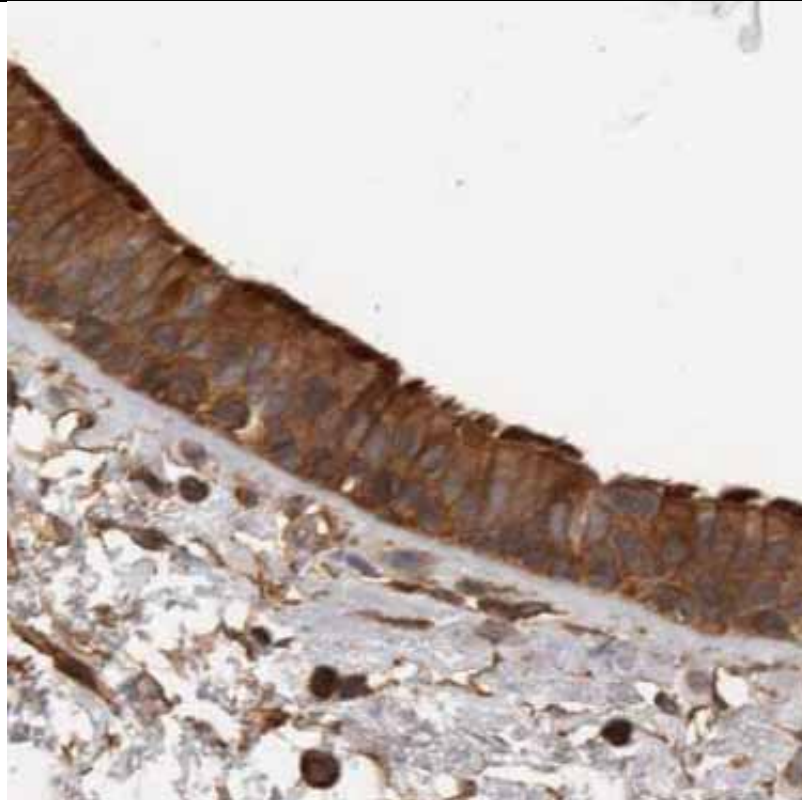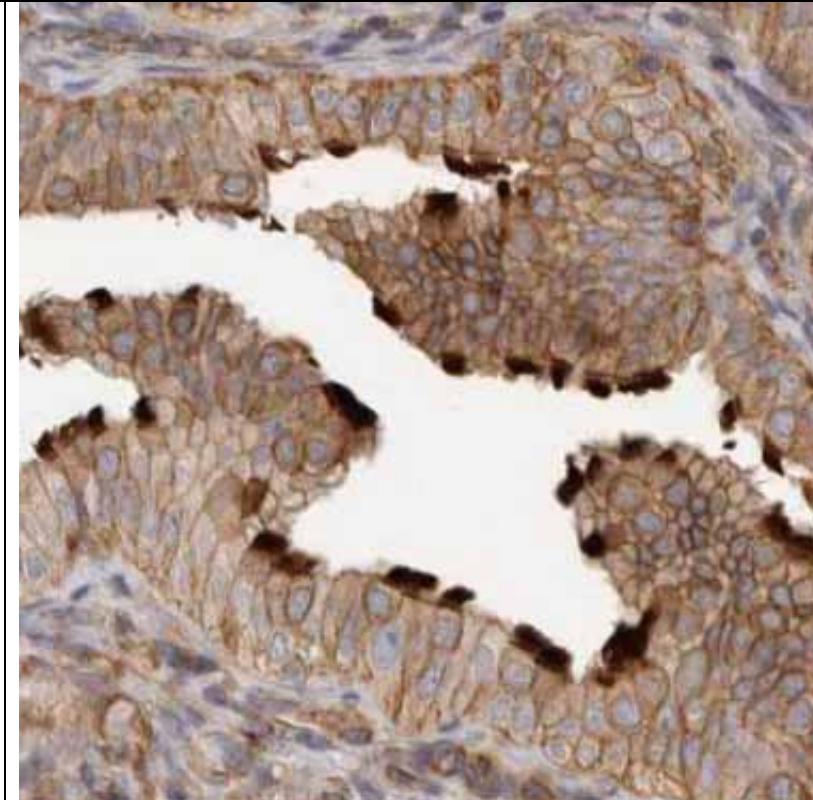

Staining is  
specific to  
*cilia*

C9orf98  
(antibody  
HPA023894)

Category 1

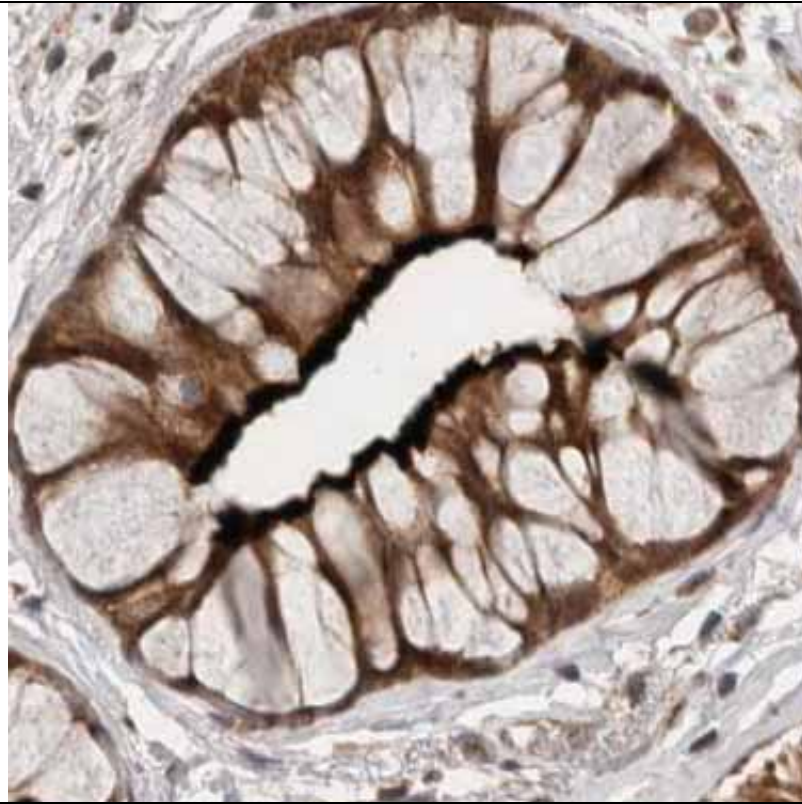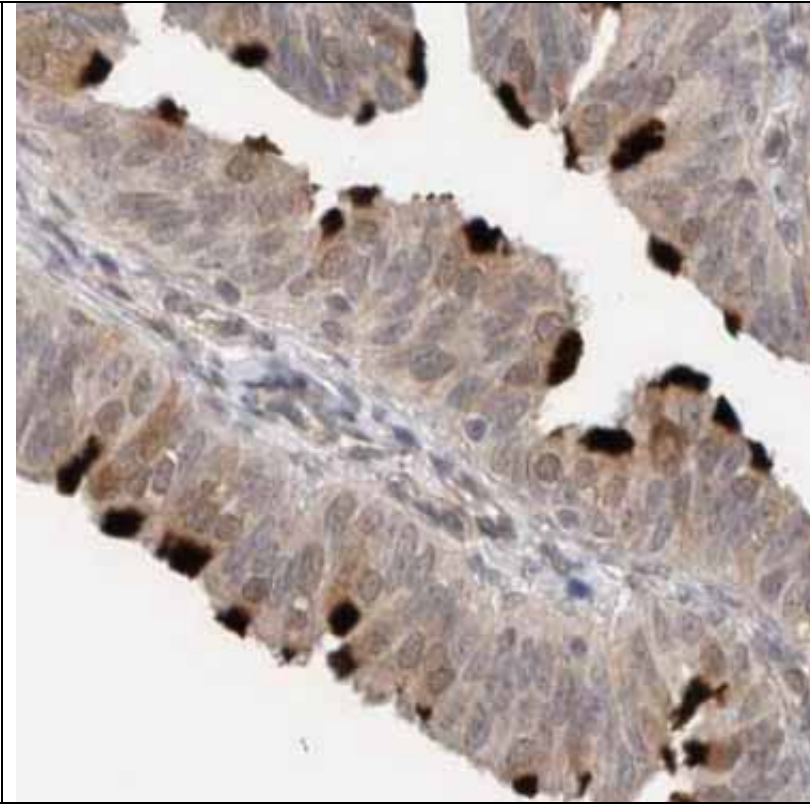

Staining is  
specific to  
*cilia*

CCDC104  
(antibody  
HPA017061)

Category 1

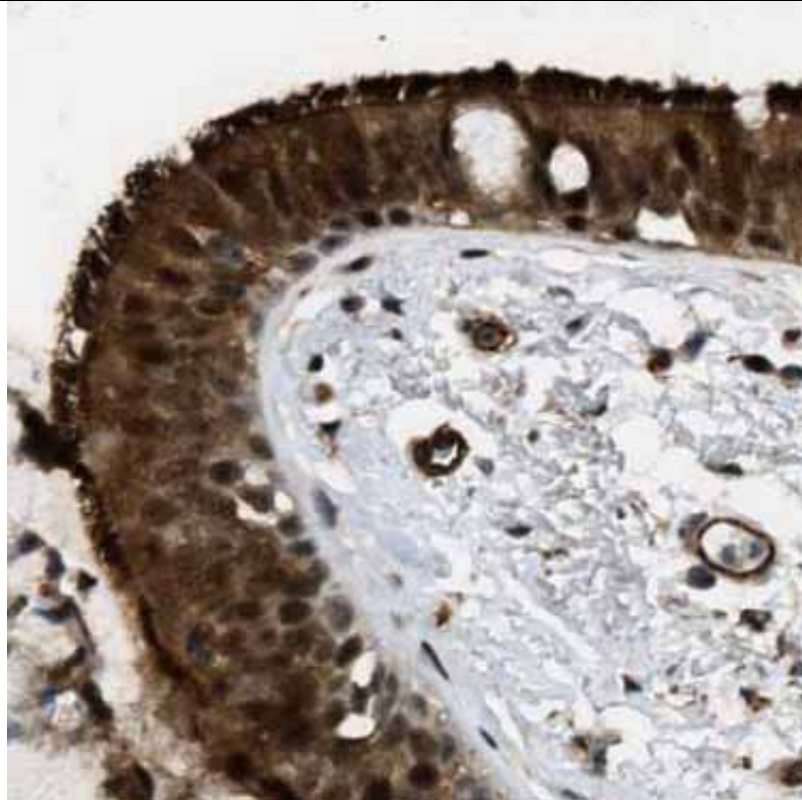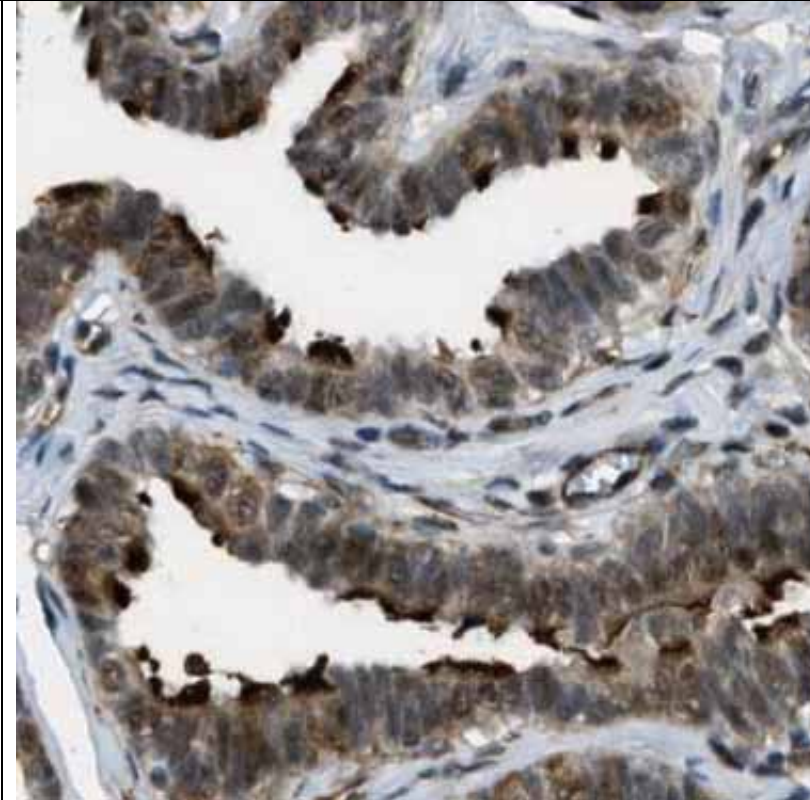

Staining is  
specific to  
*cilia*

CCDC146  
(antibody  
HPA020082)

Category 1

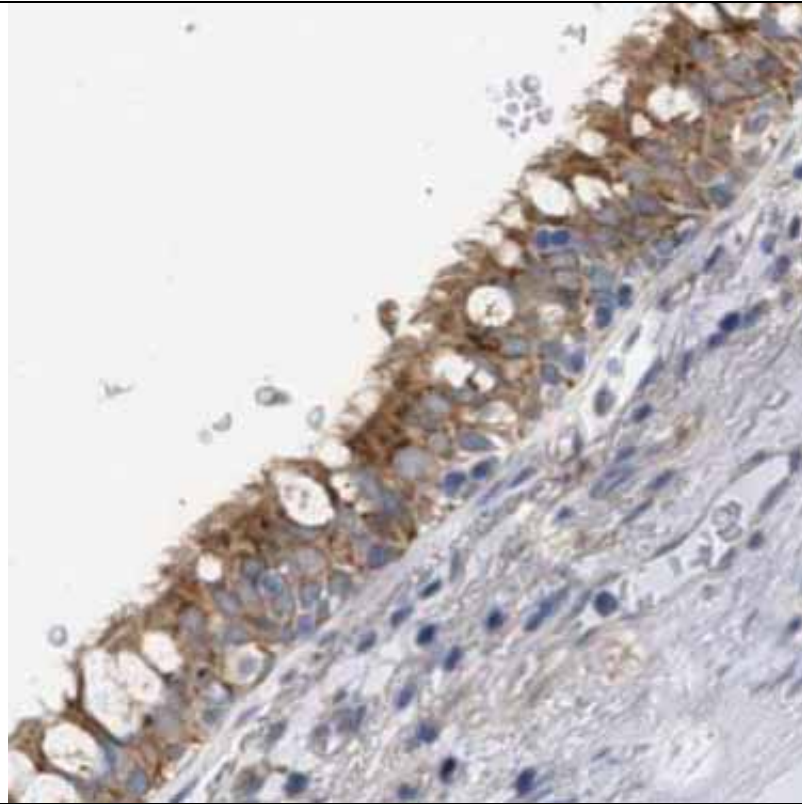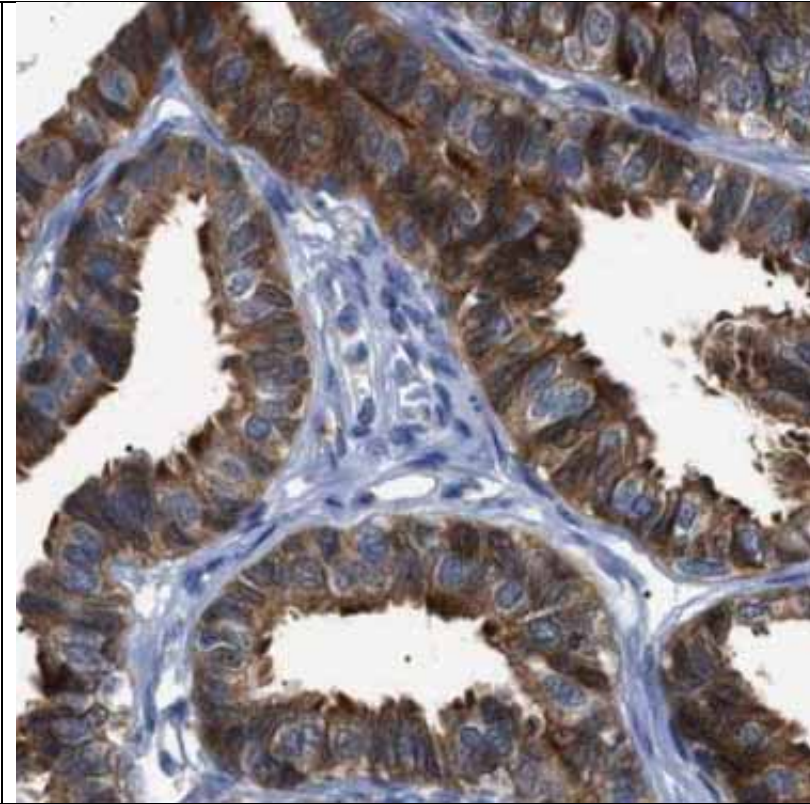

Staining is  
specific to  
*cilia*

CCDC147  
(antibody  
HPA036555)

Category 1

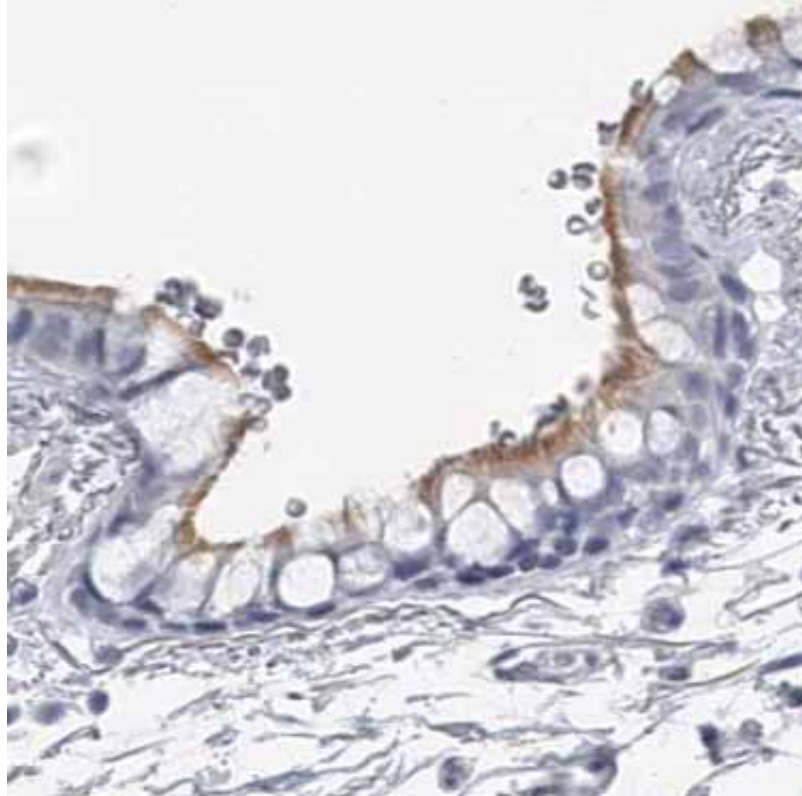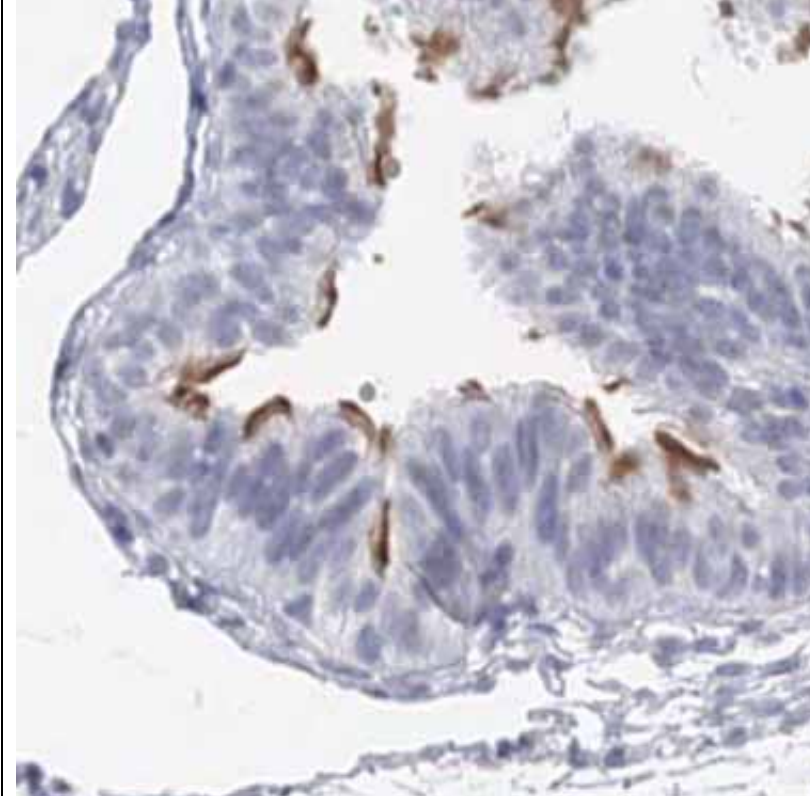

Staining is  
specific to  
*cilia*



CCDC39  
(antibody  
HPA035364)

Category 1

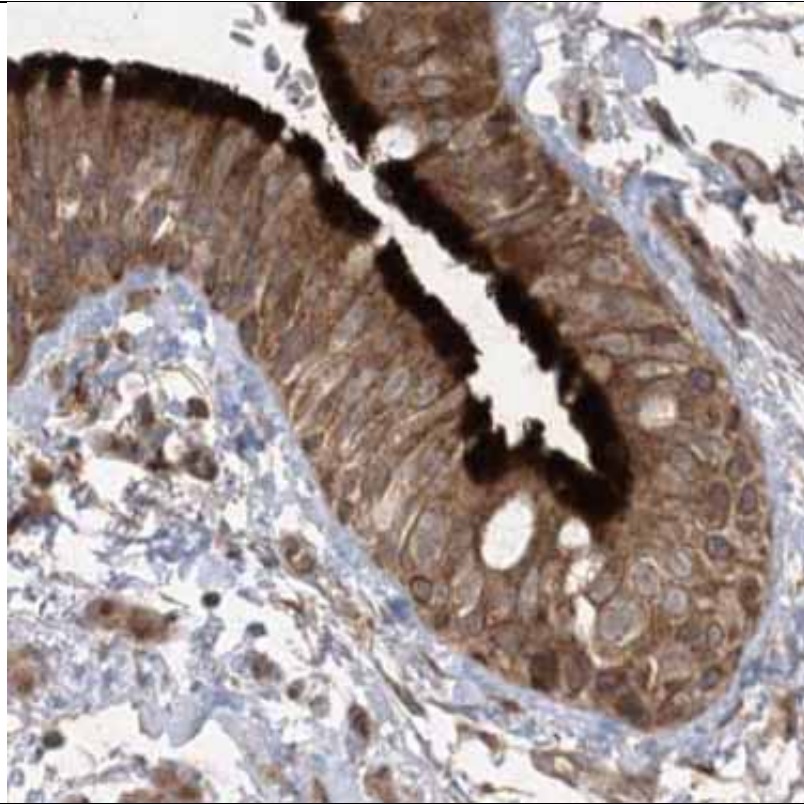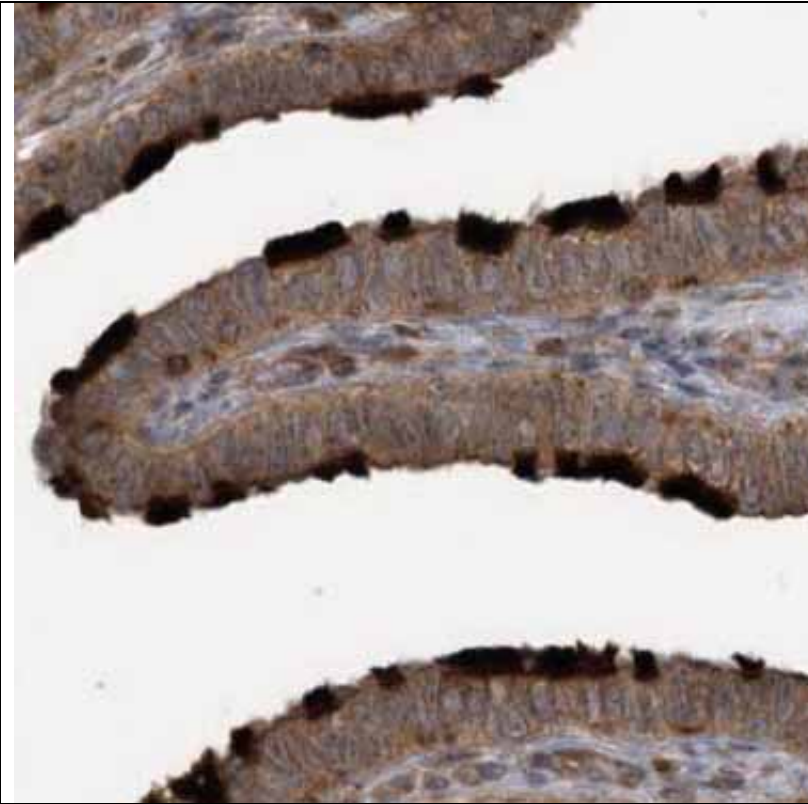

Staining is  
specific to  
*cilia*

CCDC40  
(antibody  
HPA022974)

Category 1

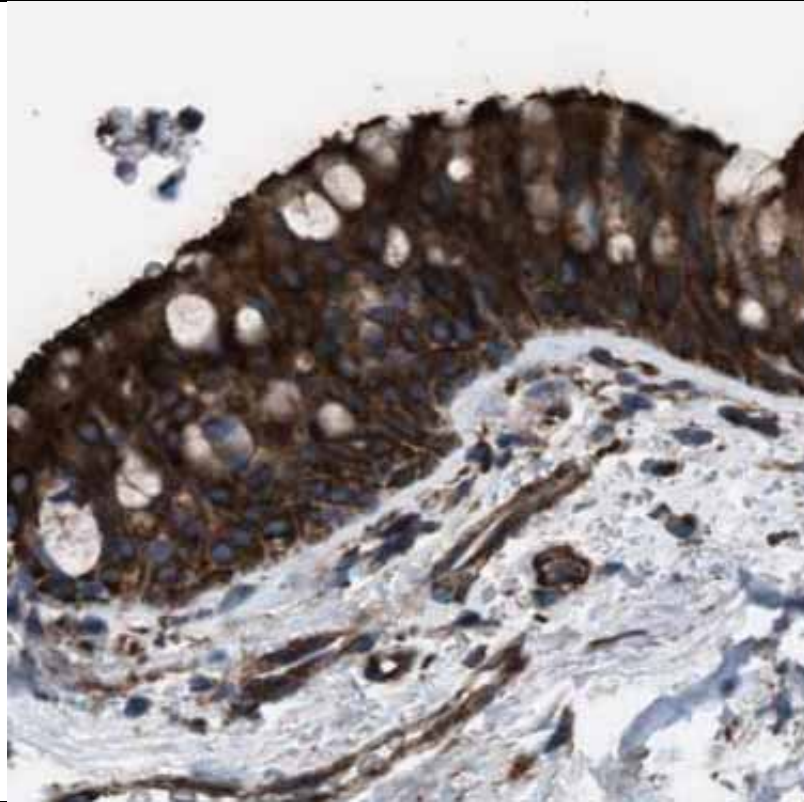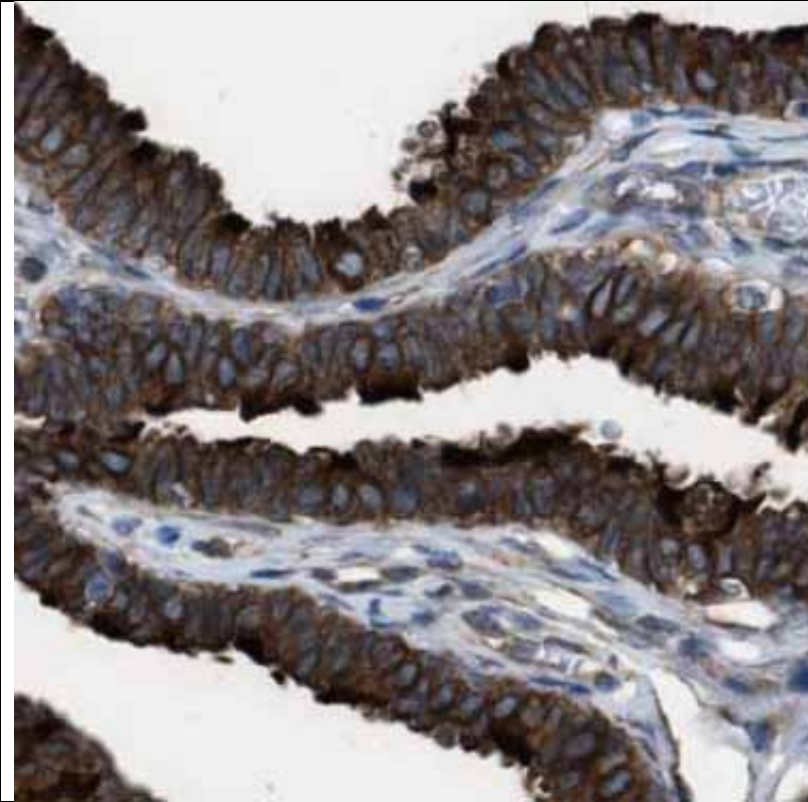

Staining is  
specific to  
*cilia*

CETN2  
(antibody  
HPA028956)

Category 1

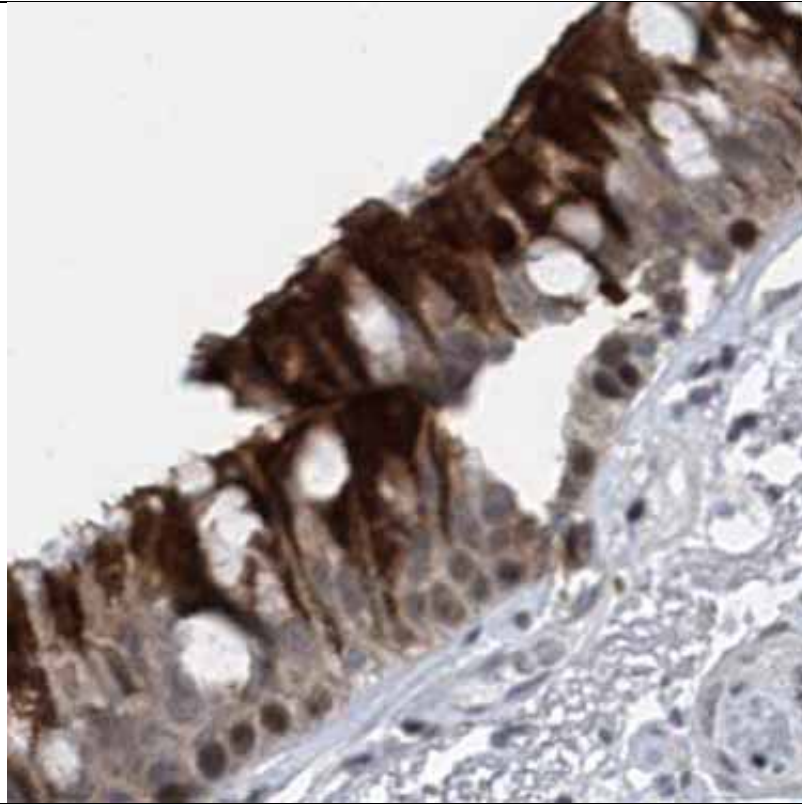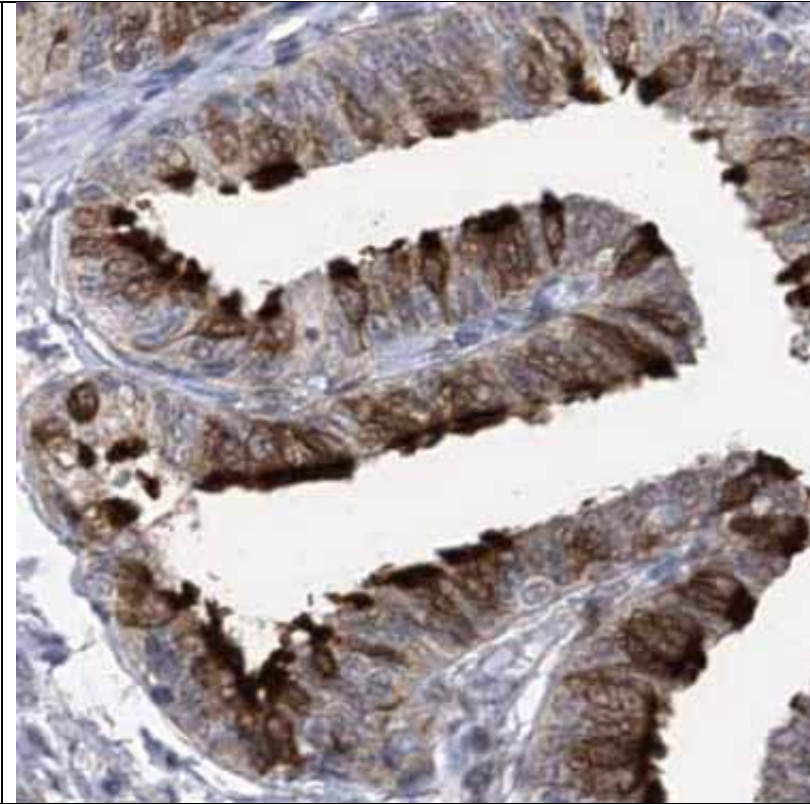

Staining is  
specific to  
*cilia*

CYB5D1  
(antibody  
HPA021632)

Category 1

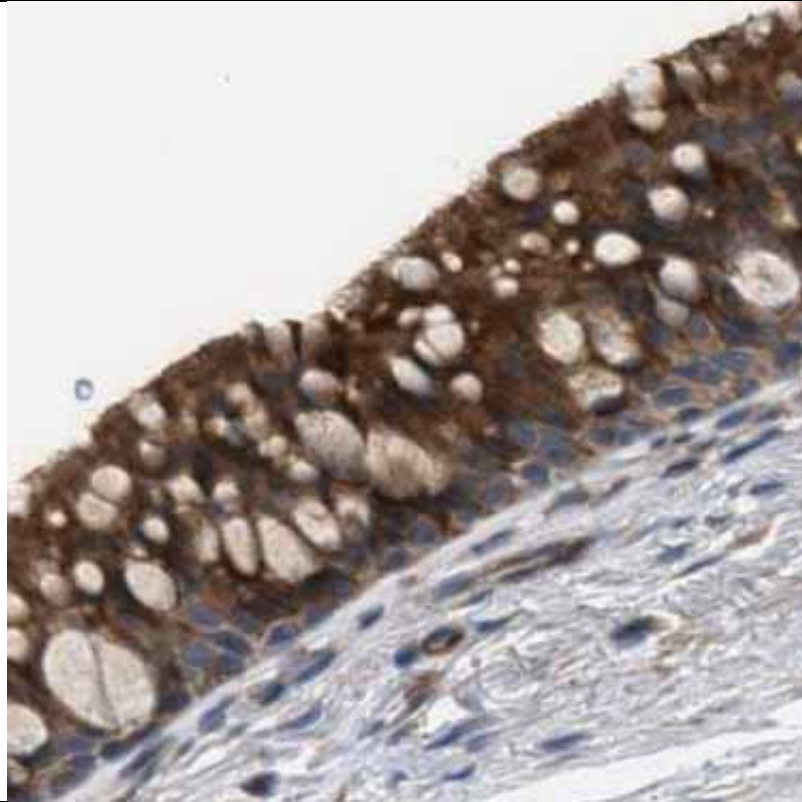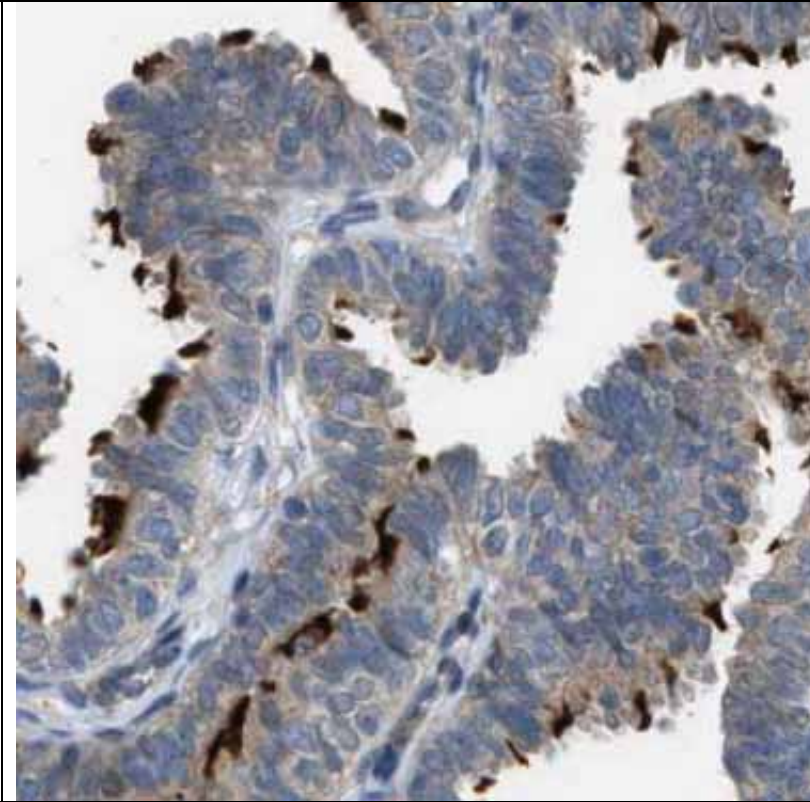

Staining is  
specific to  
*cilia*

DCDC2  
(antibody  
HPA031582)

Category 1

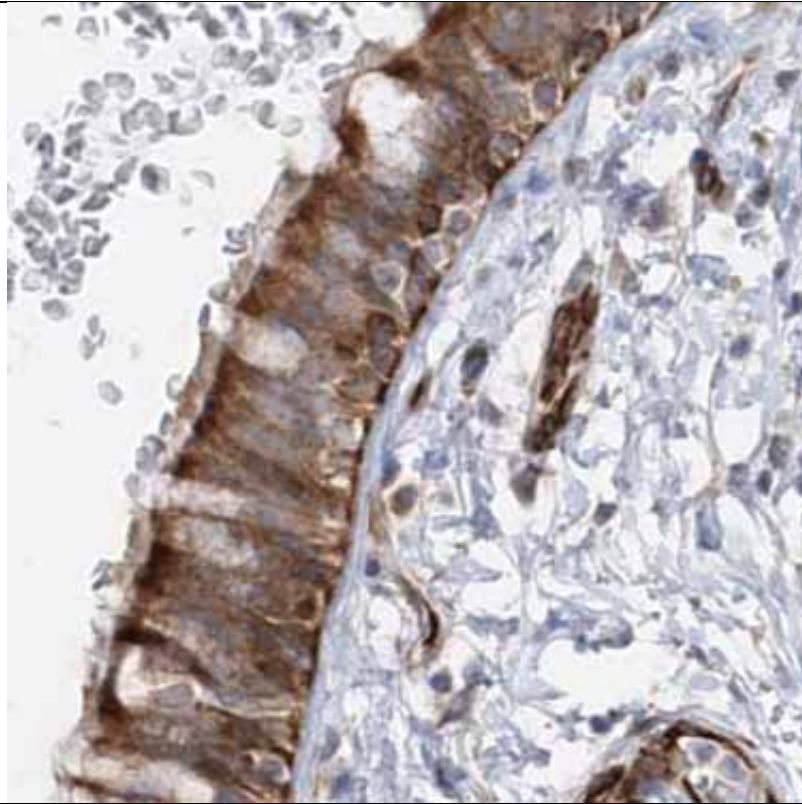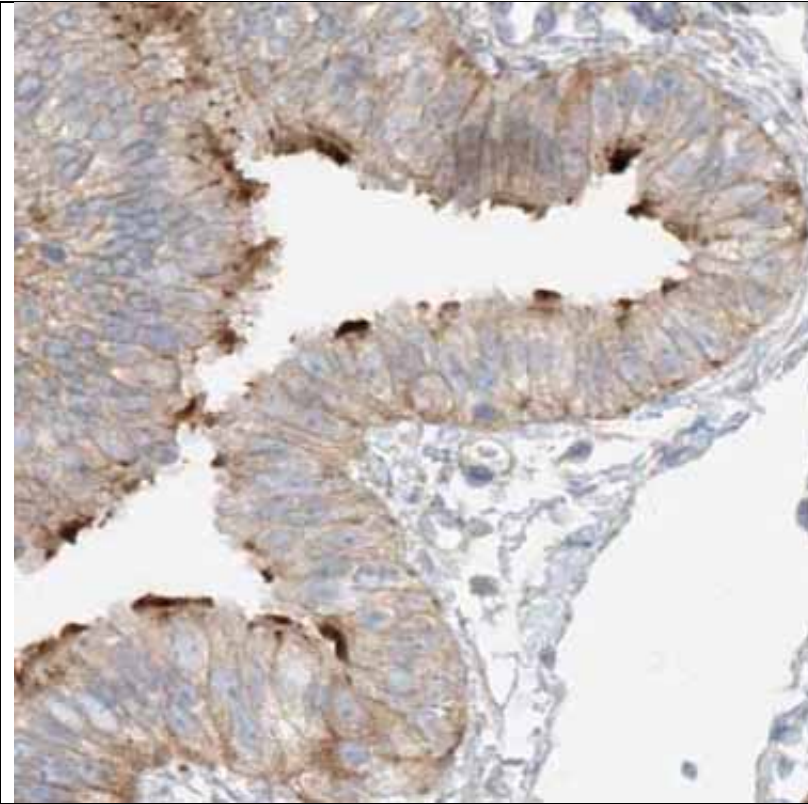

Staining is  
specific to  
*cilia*

DLEC1  
(antibody  
HPA019077)

Category 1

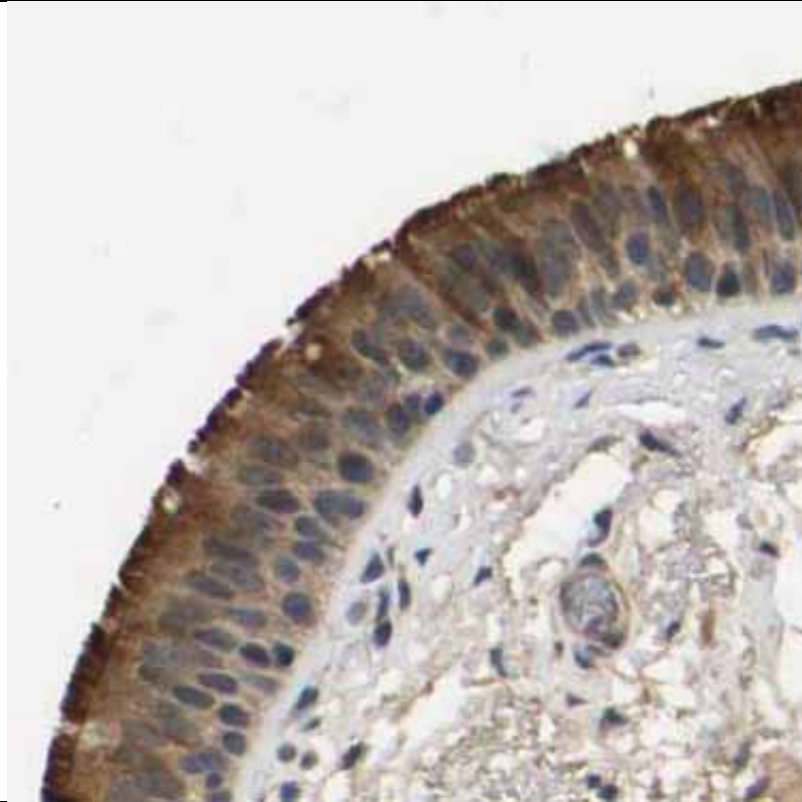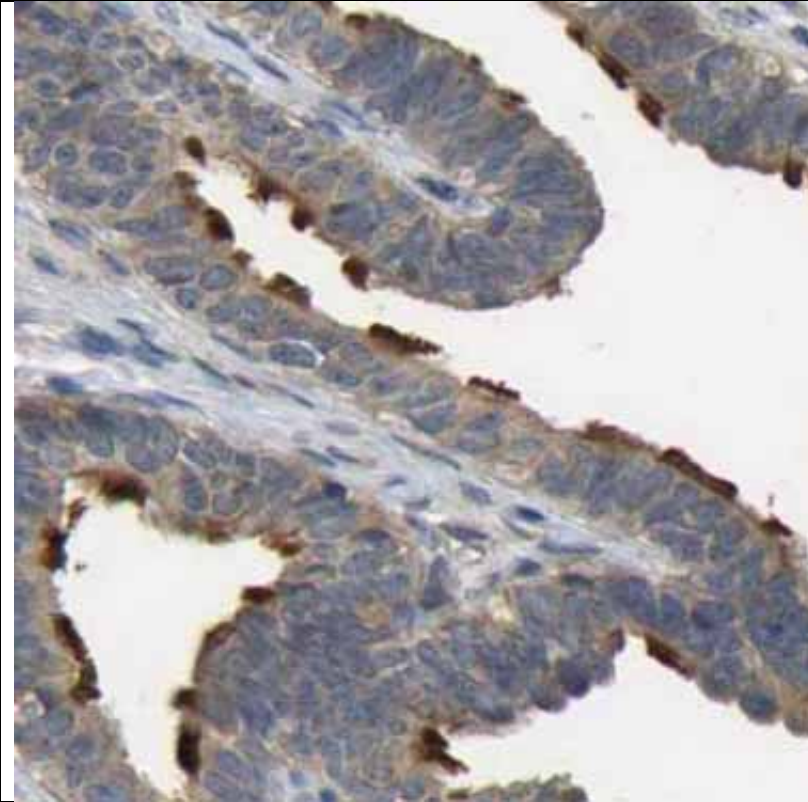

Staining is  
specific to  
*cilia*

DNAH5  
(antibody  
HPA037469)

Category 1

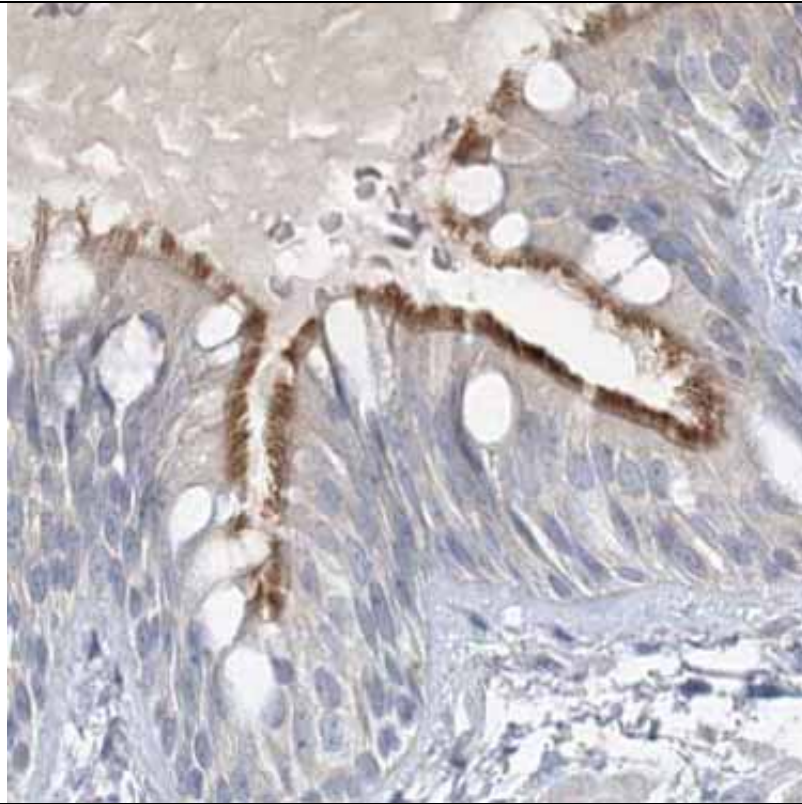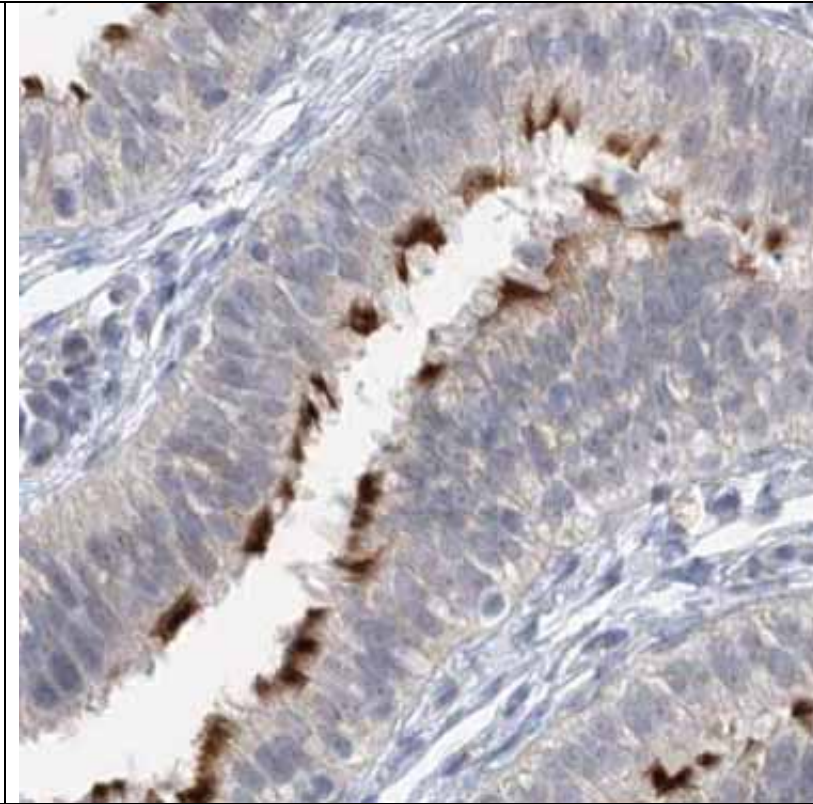

Staining is  
specific to  
*cilia*

DNAH7  
(antibody  
HPA034724)

Category 1

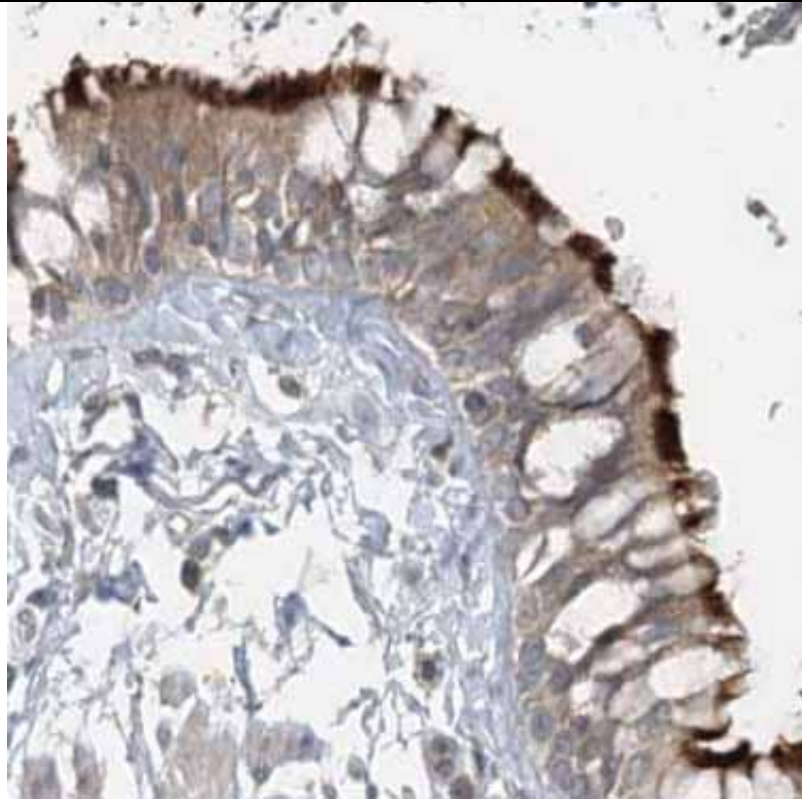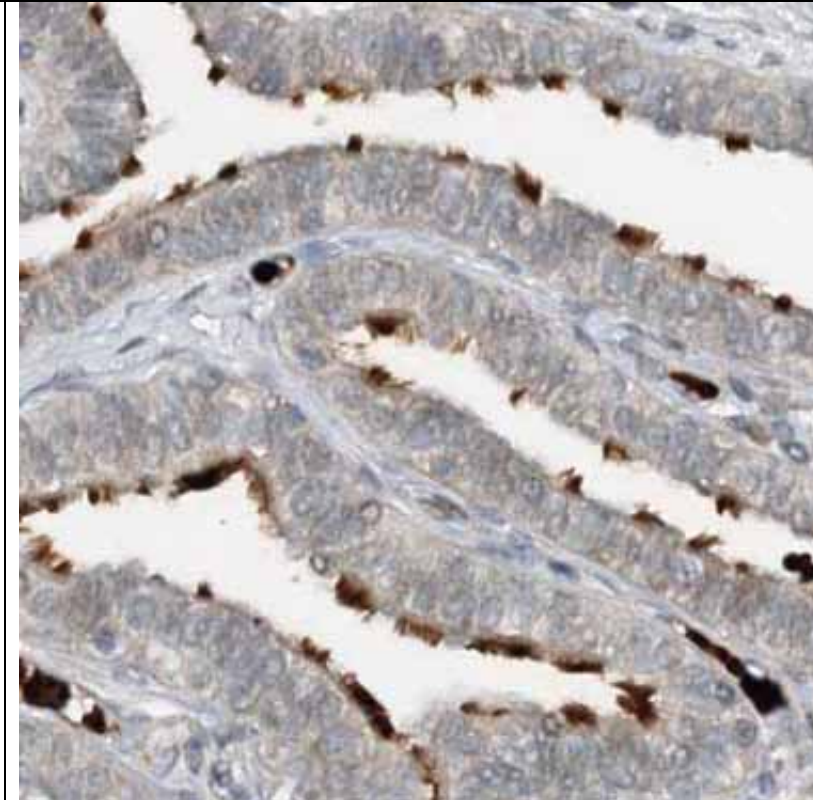

Staining is  
specific to  
*cilia*

DNAH9  
(antibody  
HPA020639)

Category 1

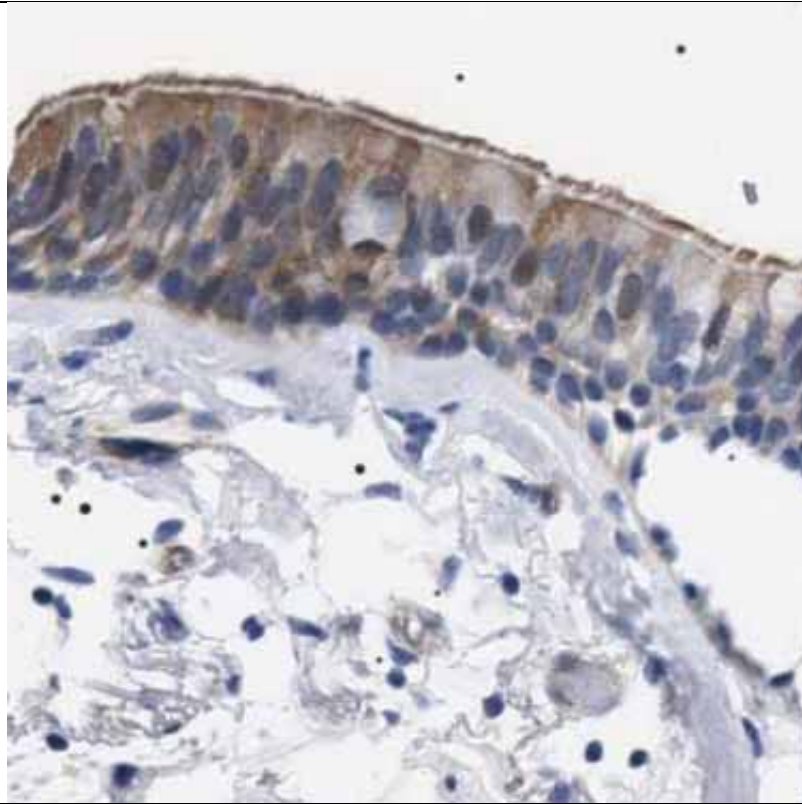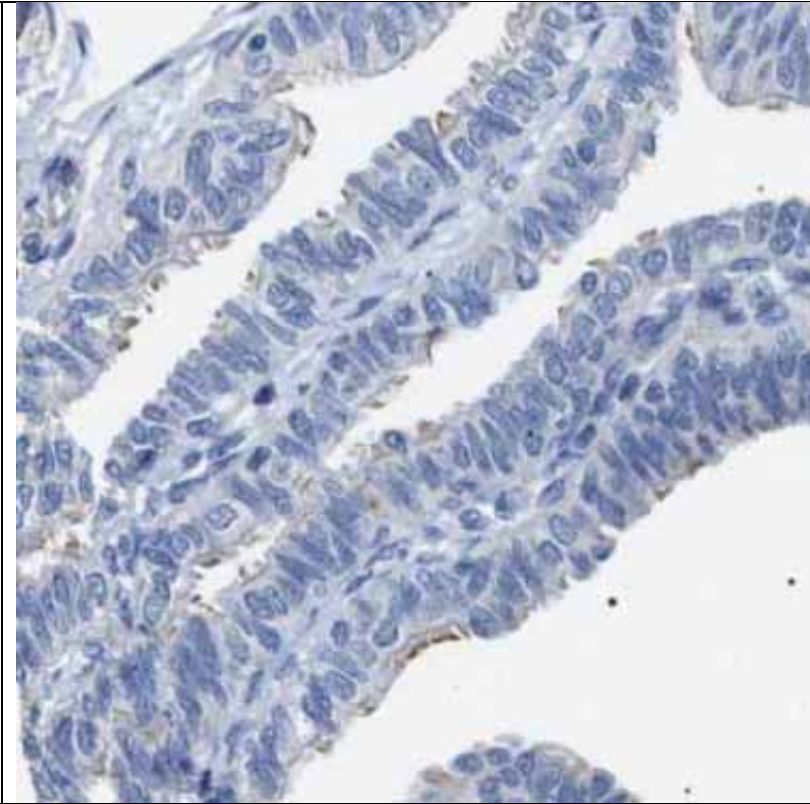

Staining is  
specific to  
*cilia*

DNAH12  
(antibody  
HPA037493)

Category 1

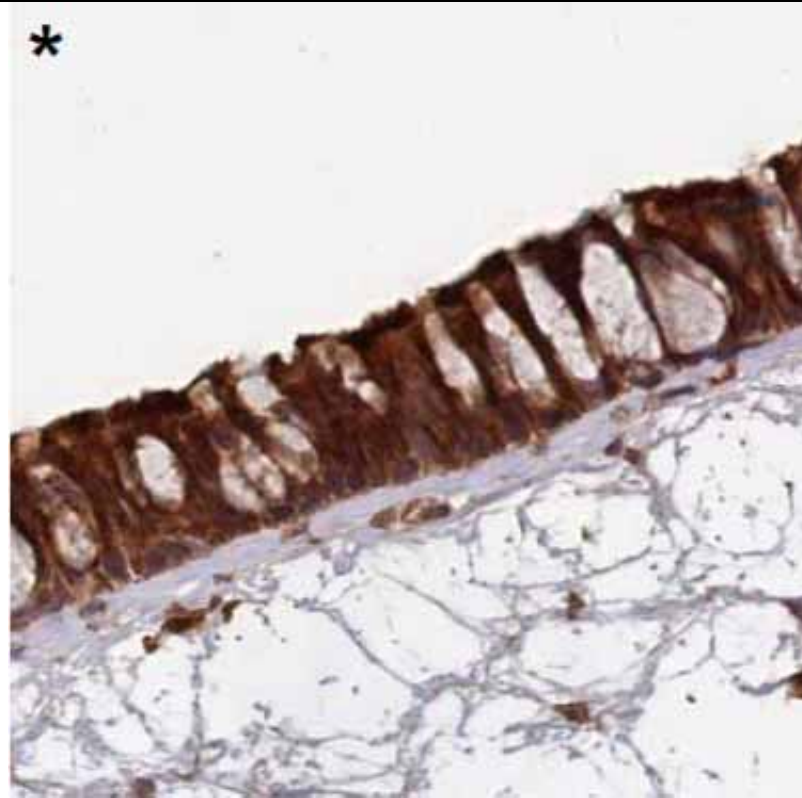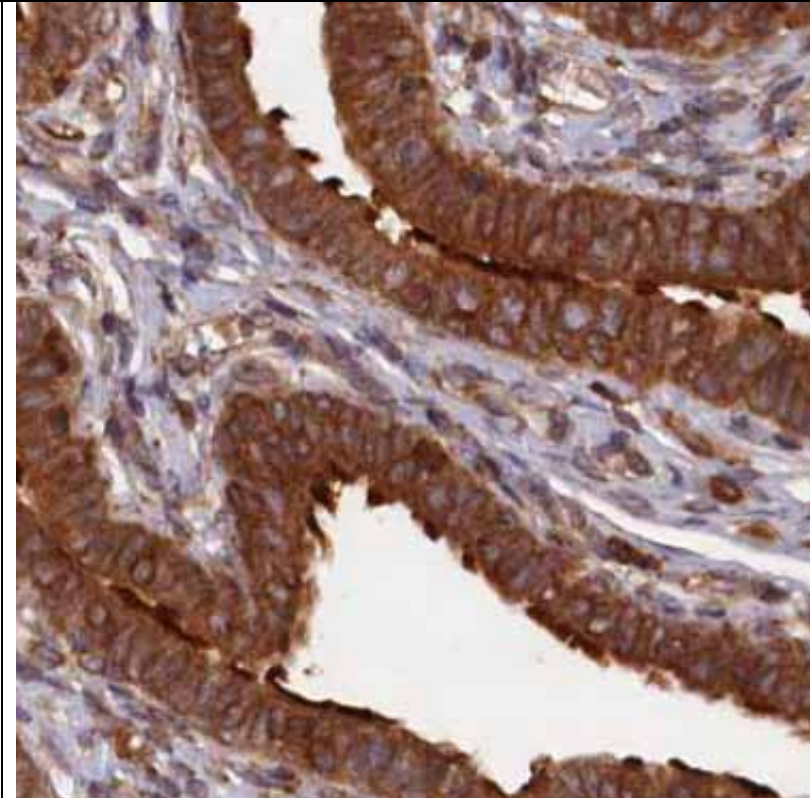

Staining is  
specific to  
*cilia*

DNAI1  
(antibody  
HPA021649)

Category 1

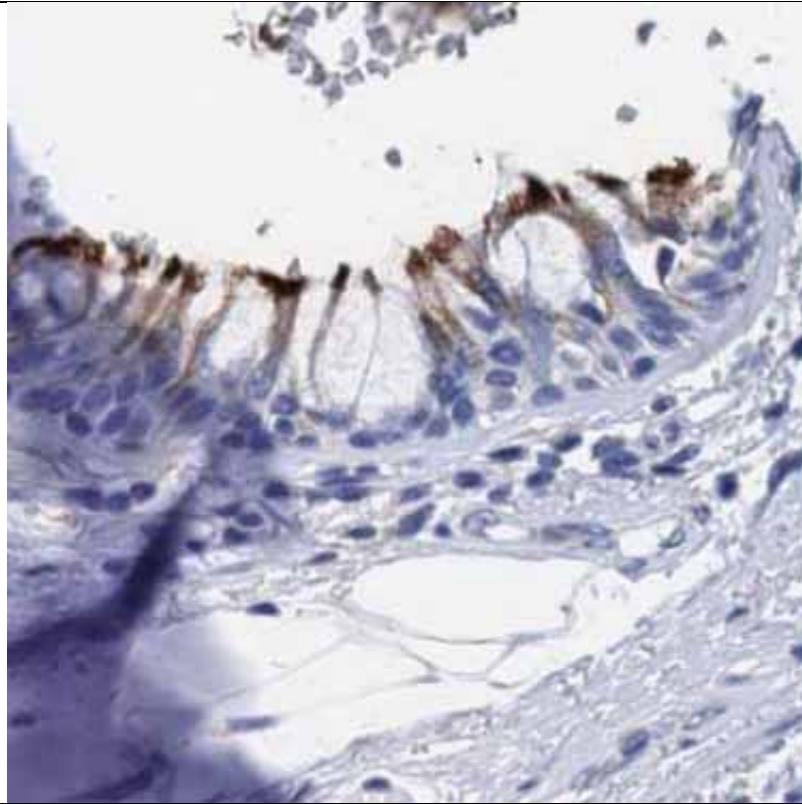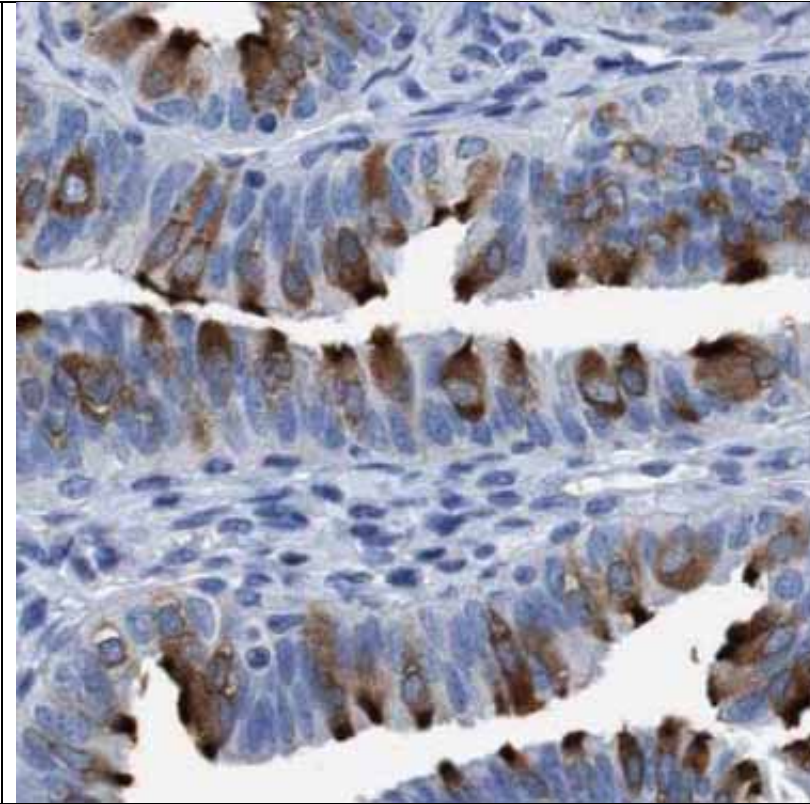

Staining is  
specific to  
*cilia*

DNAI2  
(antibody  
CAB006245)

Category 1

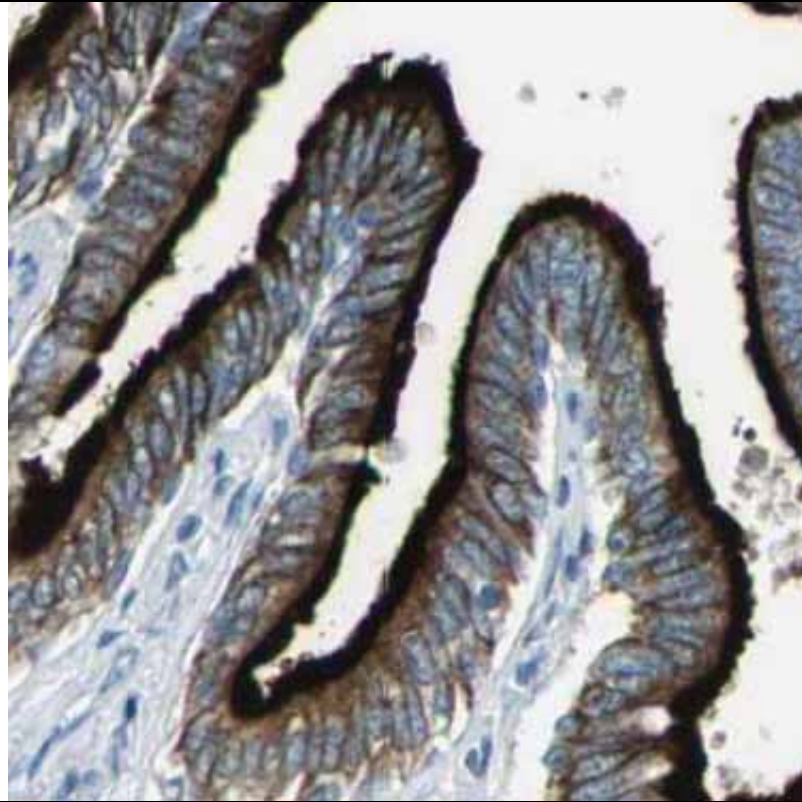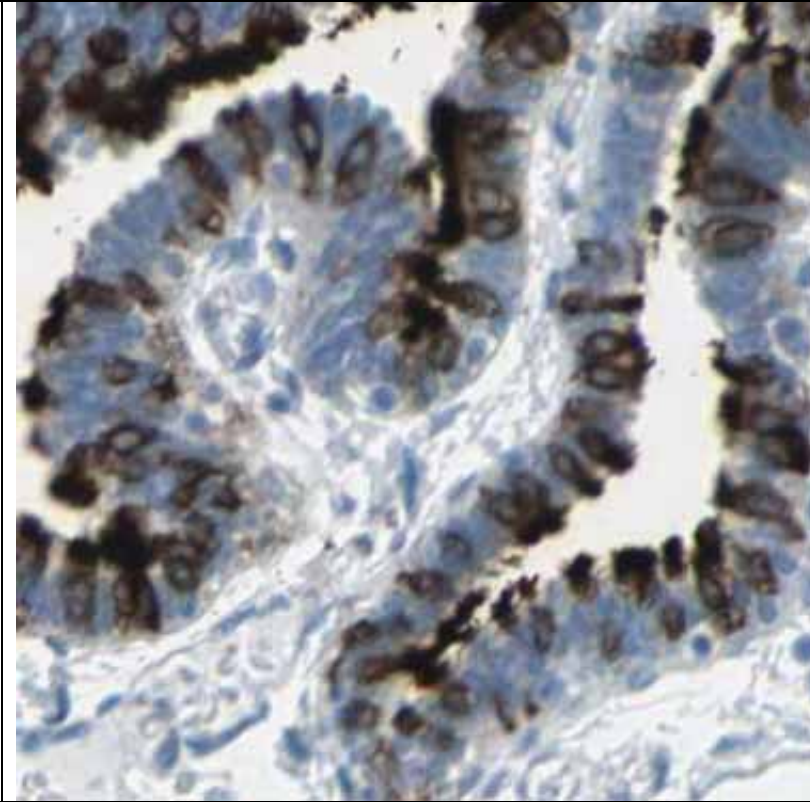

Staining is  
specific to  
*cilia*

DNALI1  
(antibody  
HPA028305)

Category 1

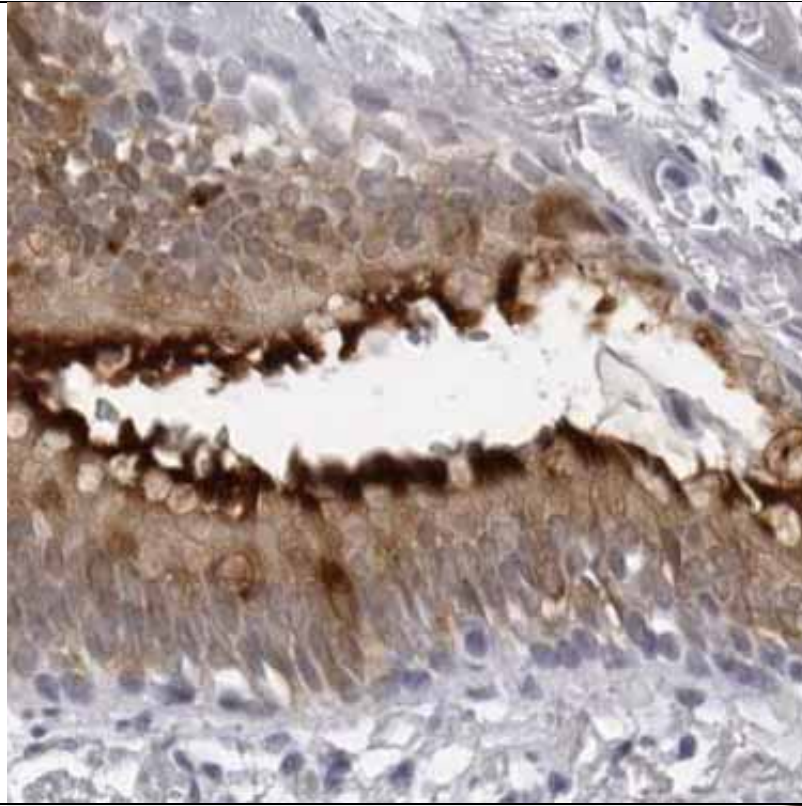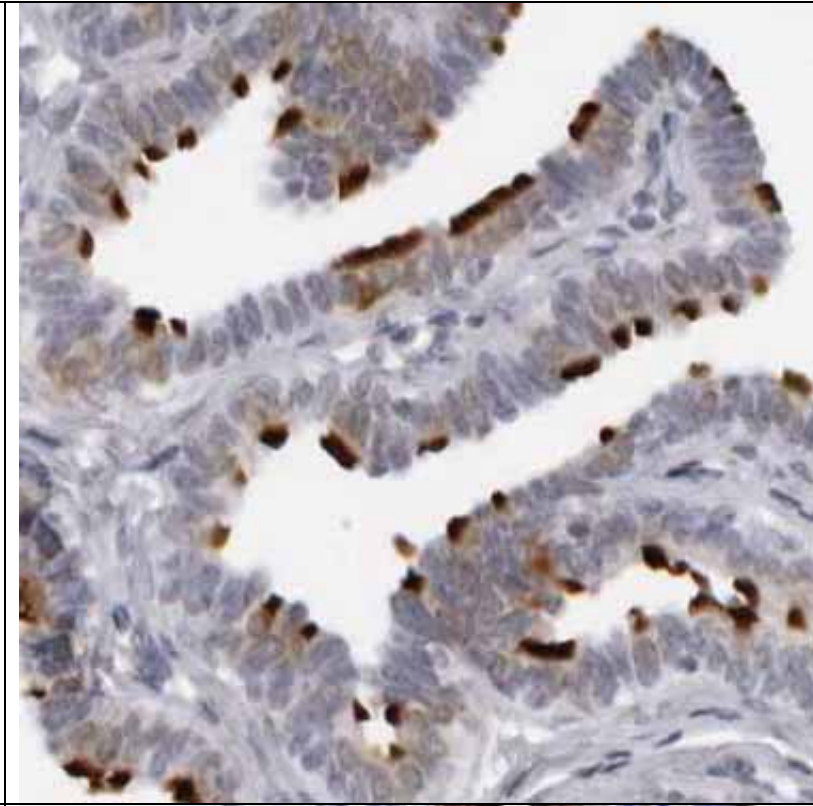

Staining is  
specific to  
*cilia*

DYDC2  
(antibody  
HPA038006)

Category 1

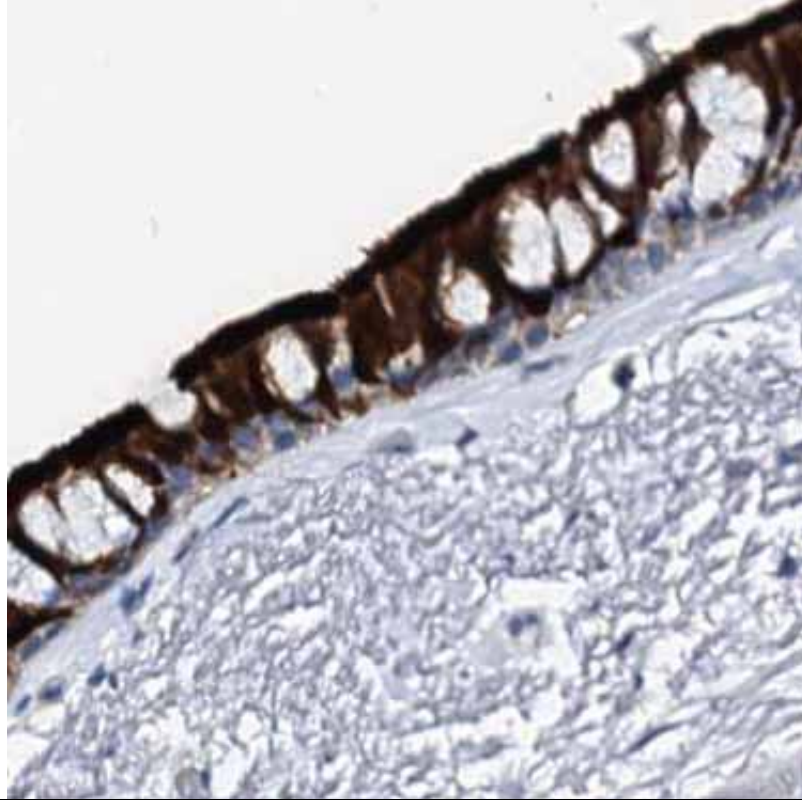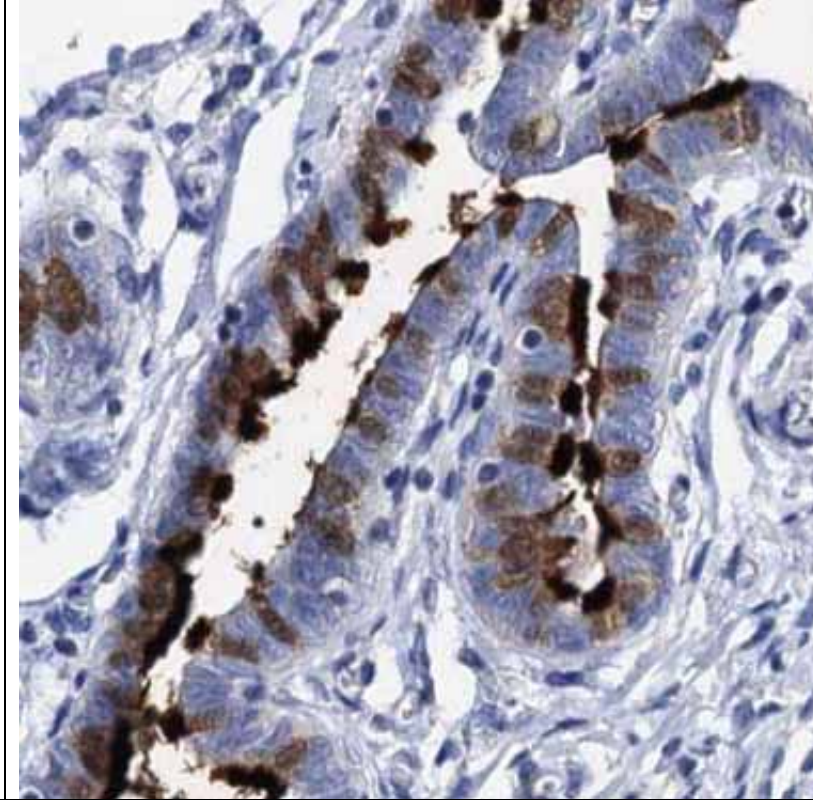

Staining is  
specific to  
*cilia*

EFCAB1  
(antibody  
HPA023527)

Category 1

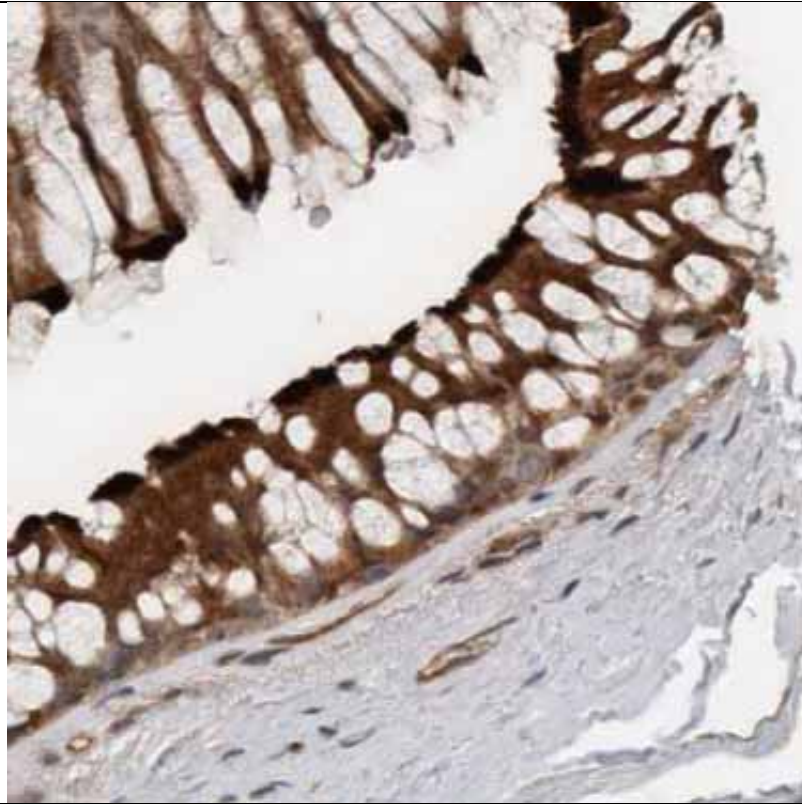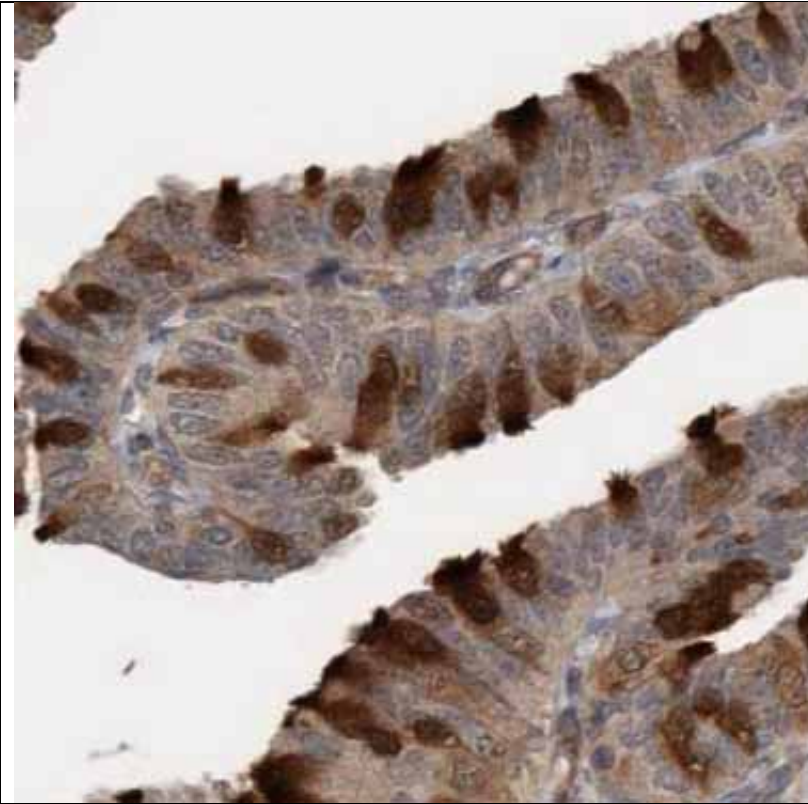

Staining is  
specific to  
*cilia*

EFCAB6  
(antibody  
HPA003098)

Category 1

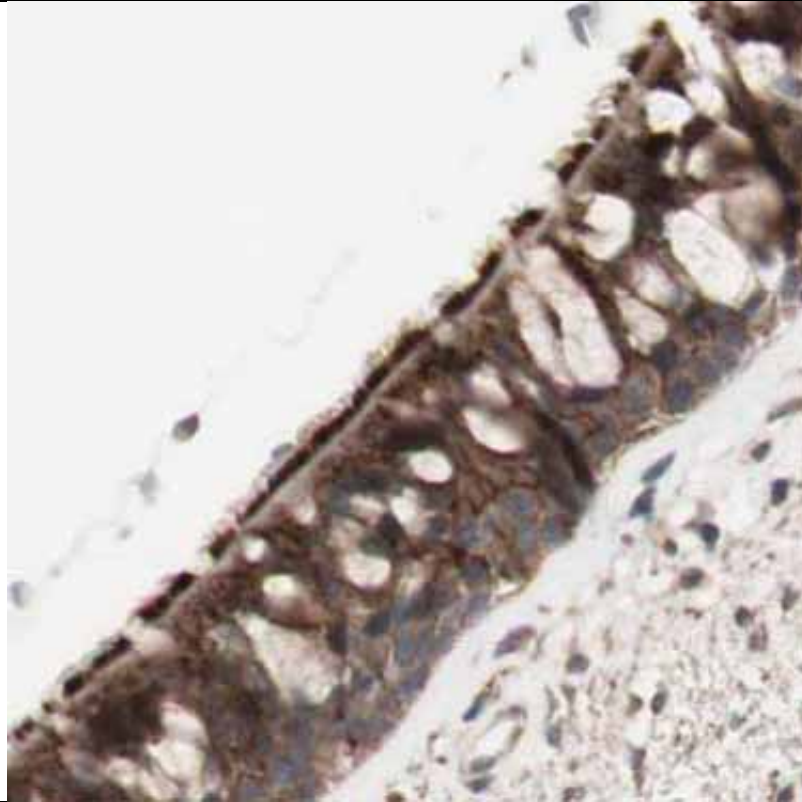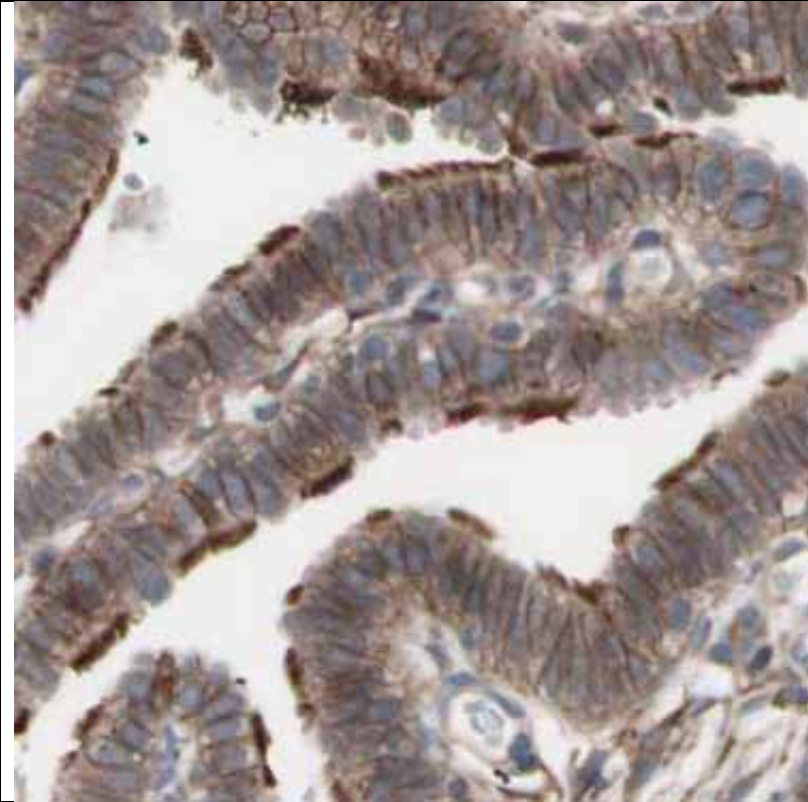

Staining is  
specific to  
*cilia*



EFHB  
(antibody  
HPA034834)  
Category 1

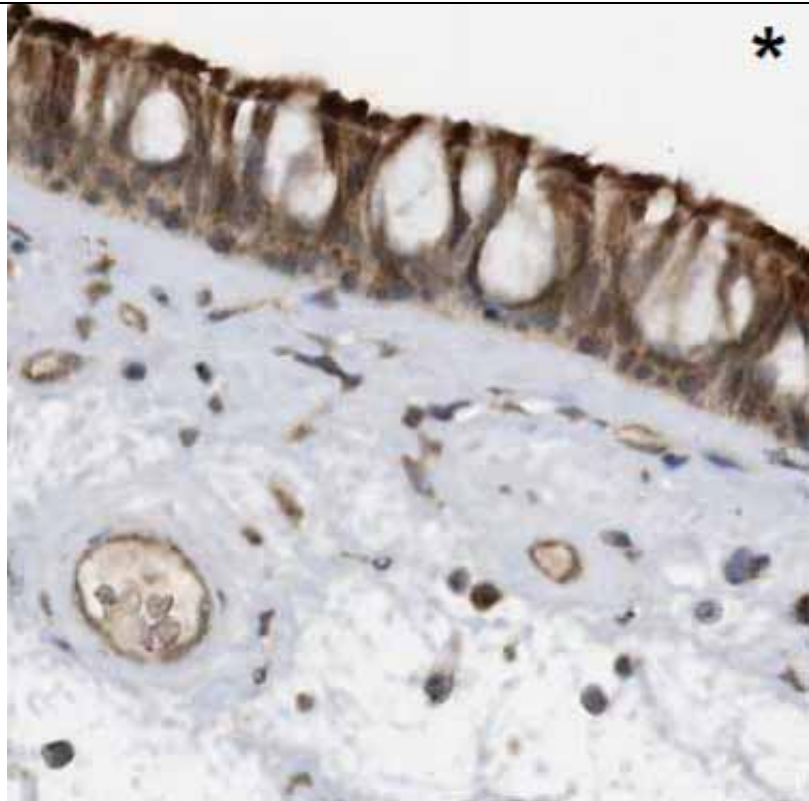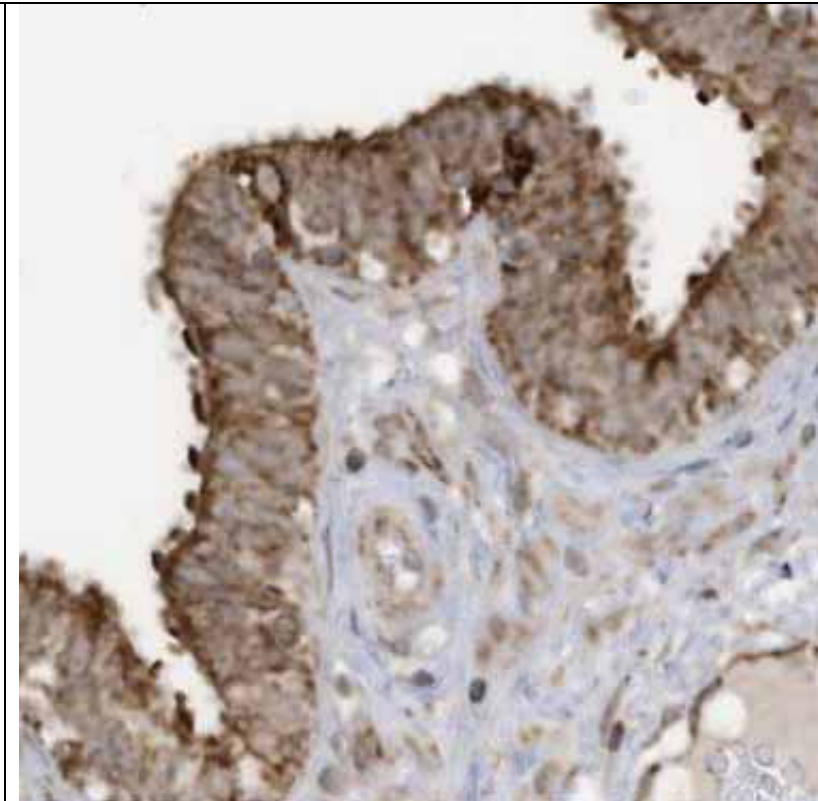

Staining is  
specific to  
*cilia*

EFHC1  
(antibody  
CAB020814)  
Category 1

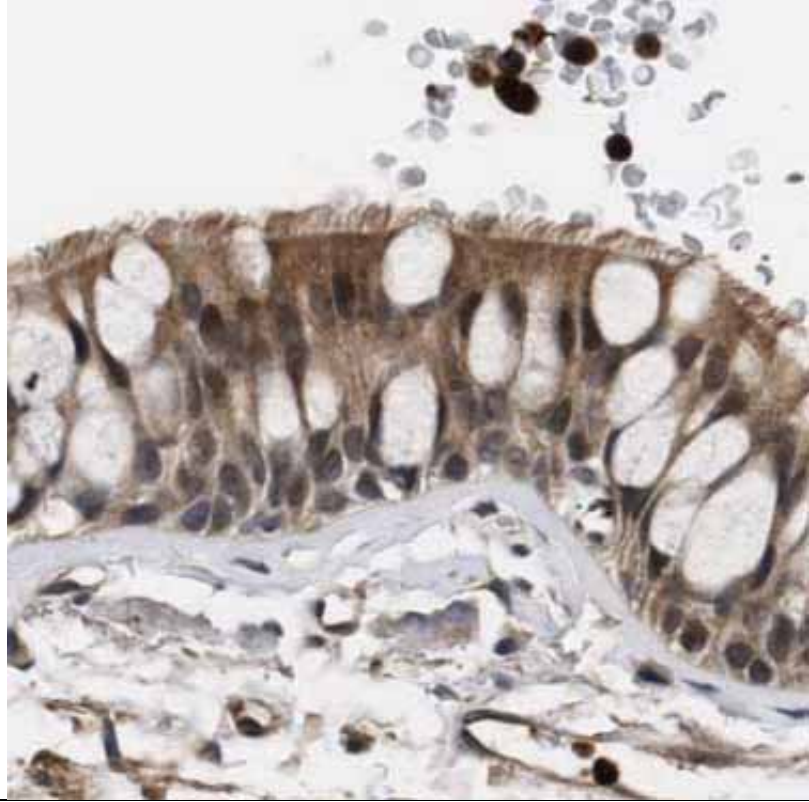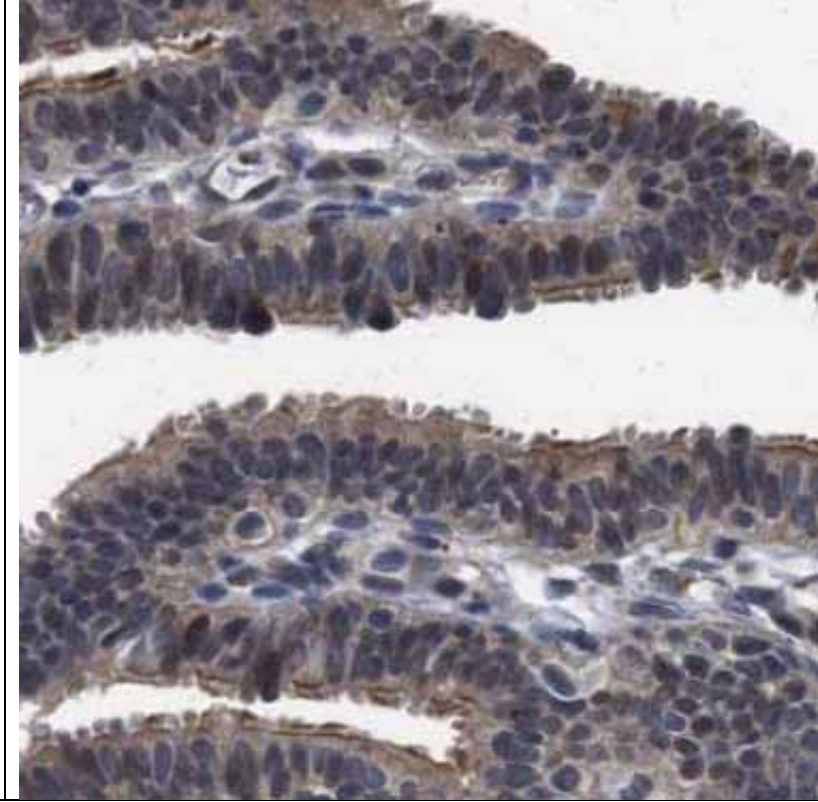

Staining is  
specific to  
*cilia*

EFHC2  
(antibody  
HPA034492)  
Category 1

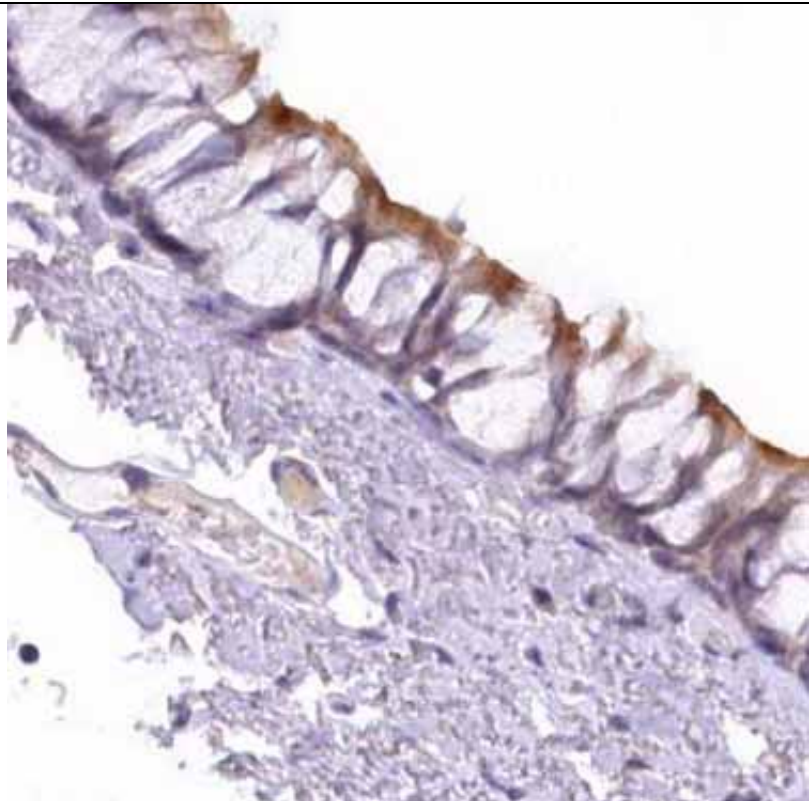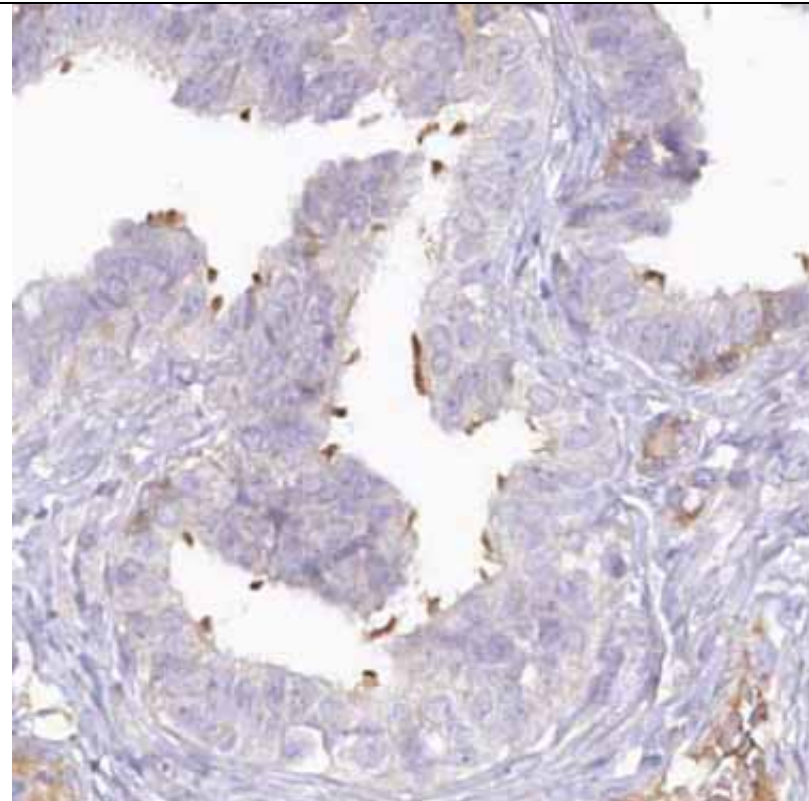

Staining is  
specific to  
*cilia*

FLJ23834  
(antibody  
HPA011218)  
Category 1

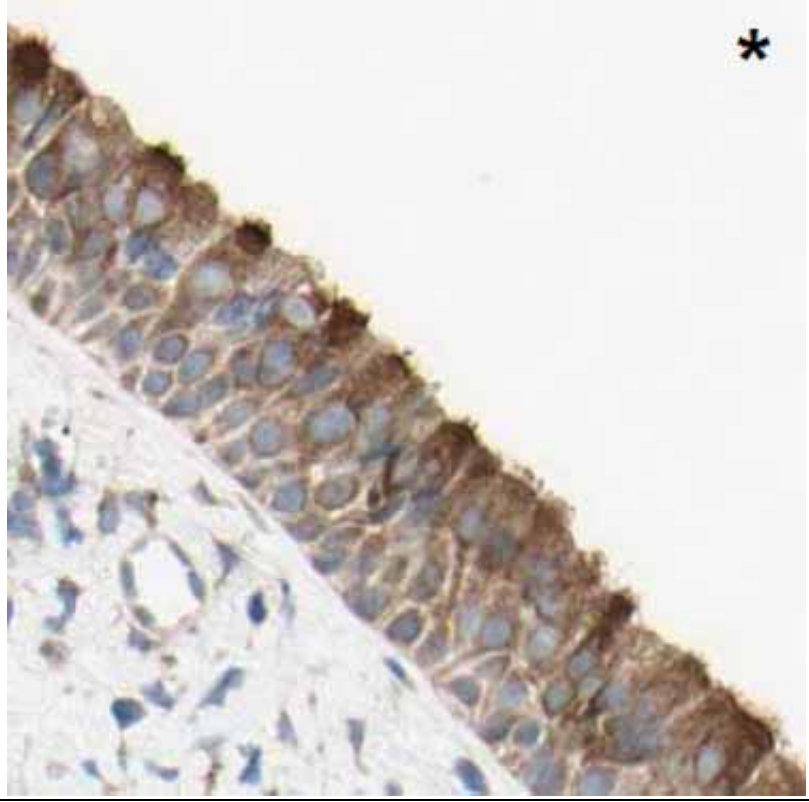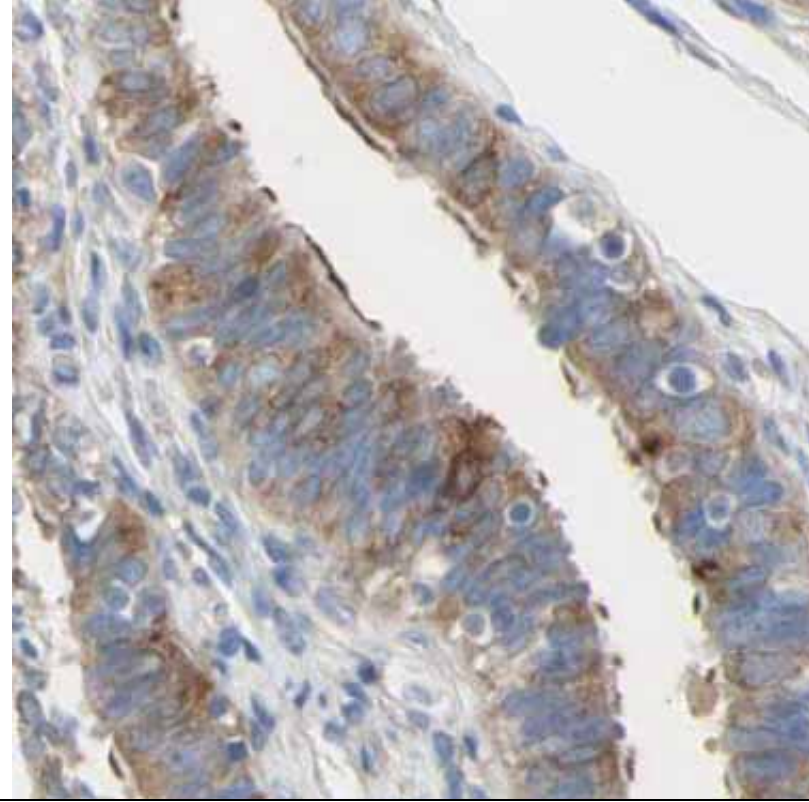

Staining is  
specific to  
*cilia*

IQUB  
(antibody  
HPA020621)

Category 1

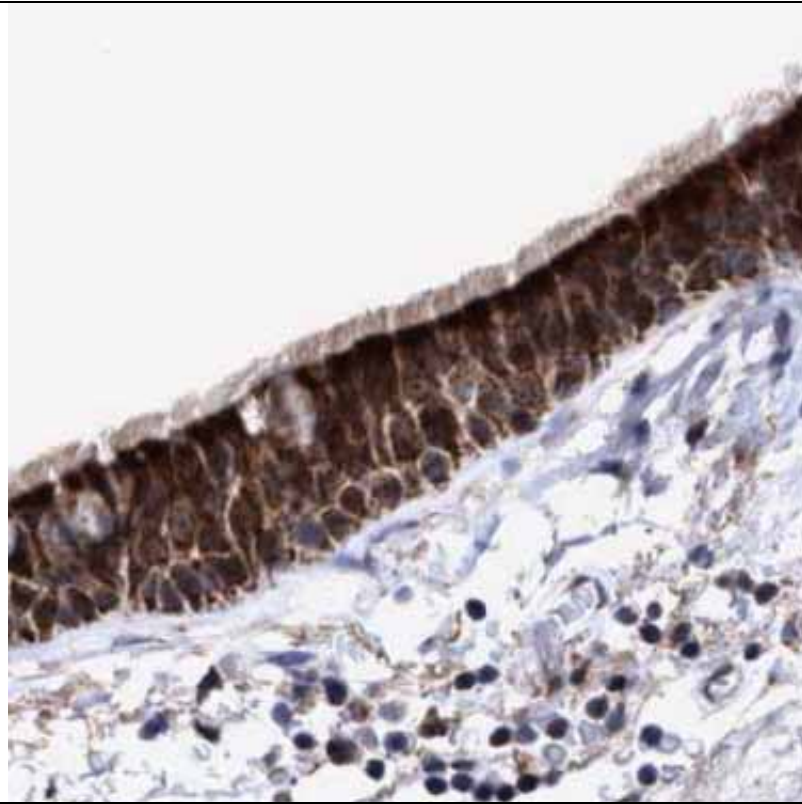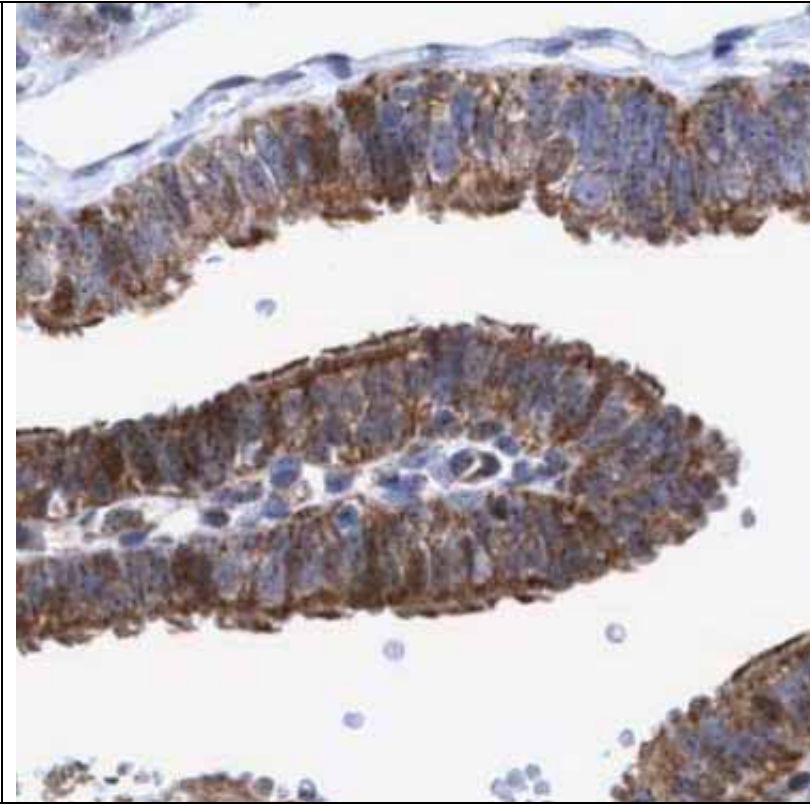

Staining is  
specific to  
*cilia*

KIF9  
(antibody  
HPA022031)

Category 1

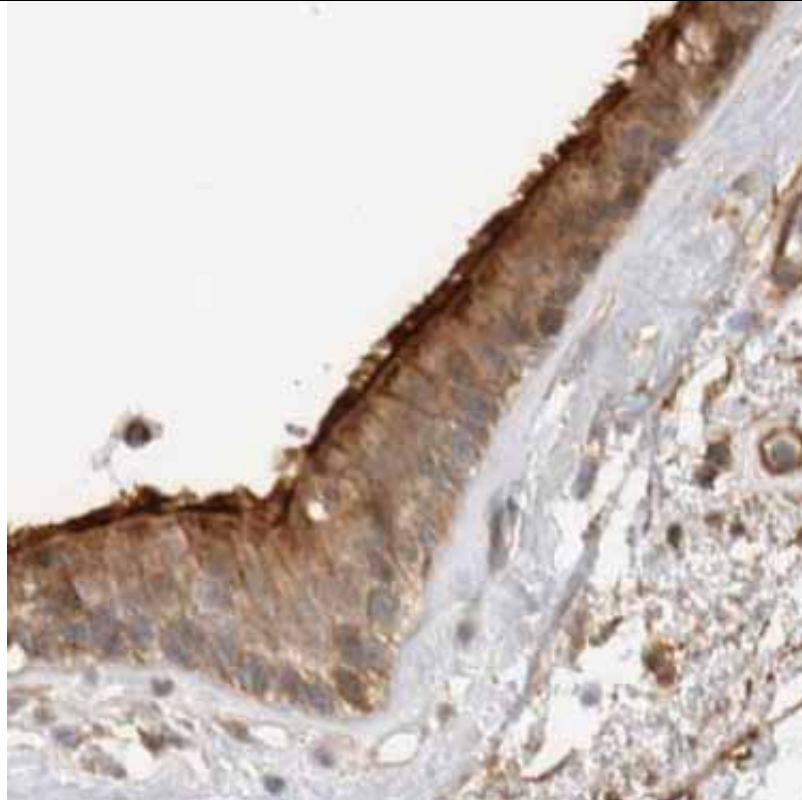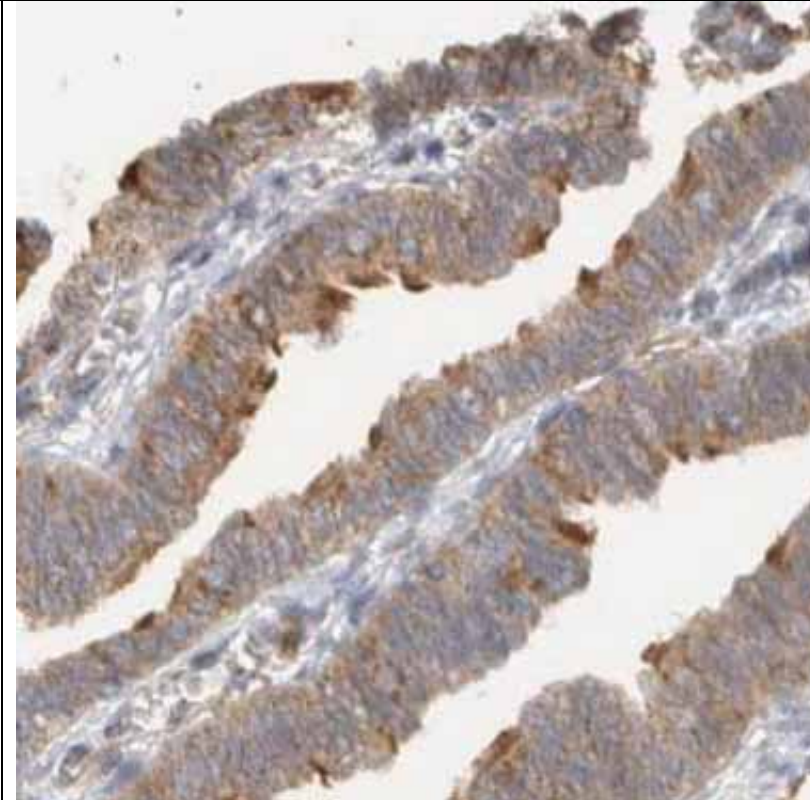

Staining is  
specific to  
*cilia*

LCA5  
(antibody  
HPA029053)

Category 1

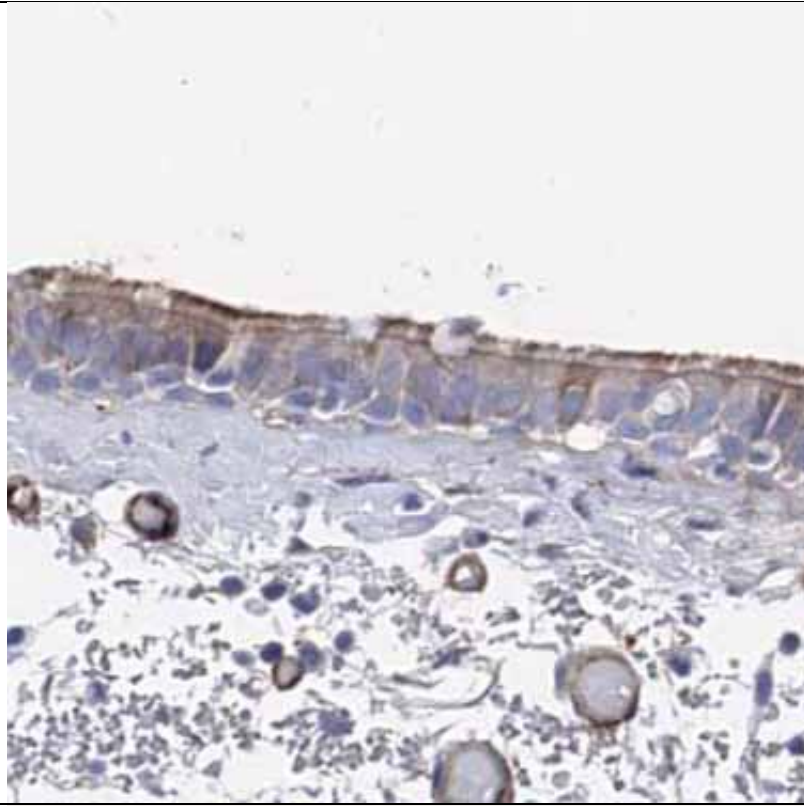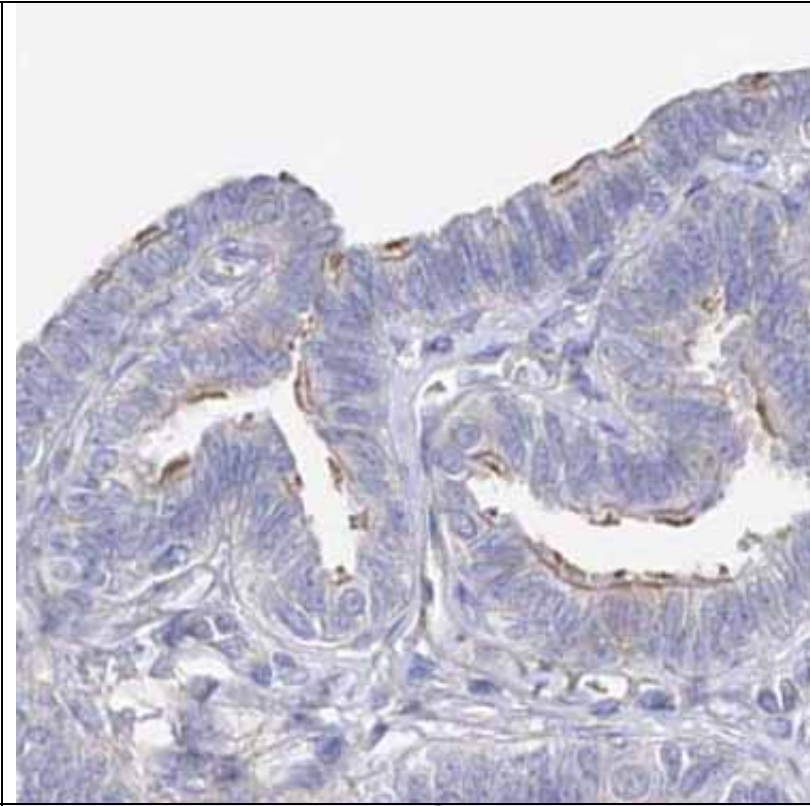

Staining is  
specific to  
*cilia*

LRRC23  
(antibody  
HPA037766)

Category 1

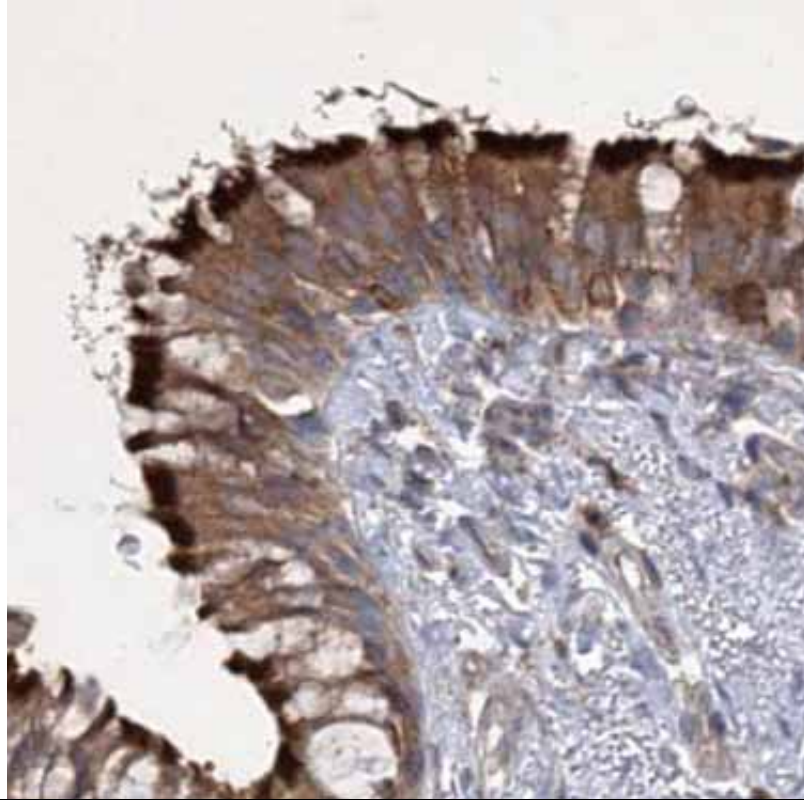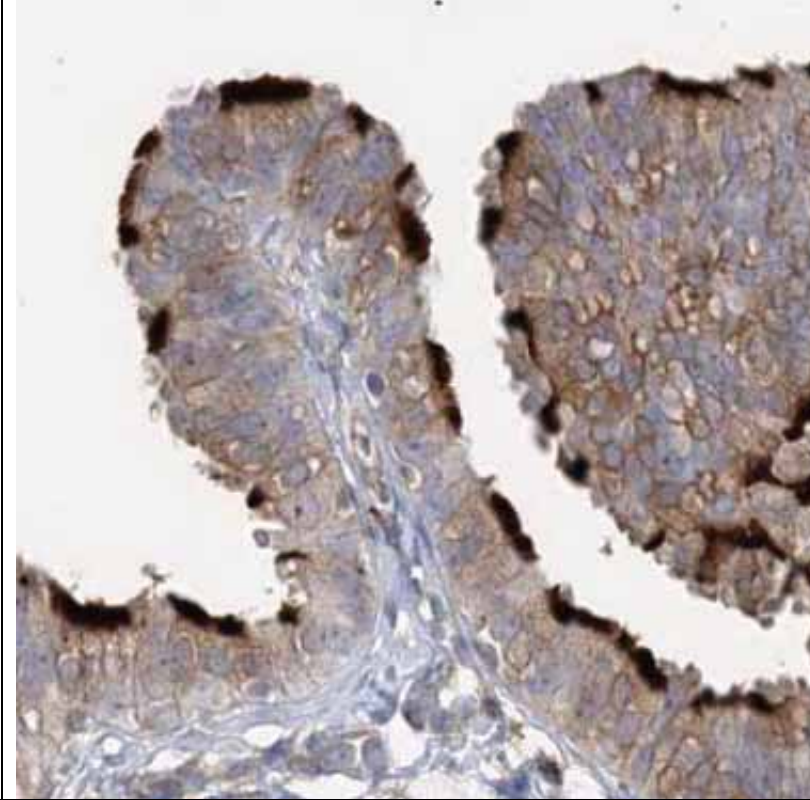

Staining is  
specific to  
*cilia*

LRRC34  
(antibody  
HPA035747)

Category 1

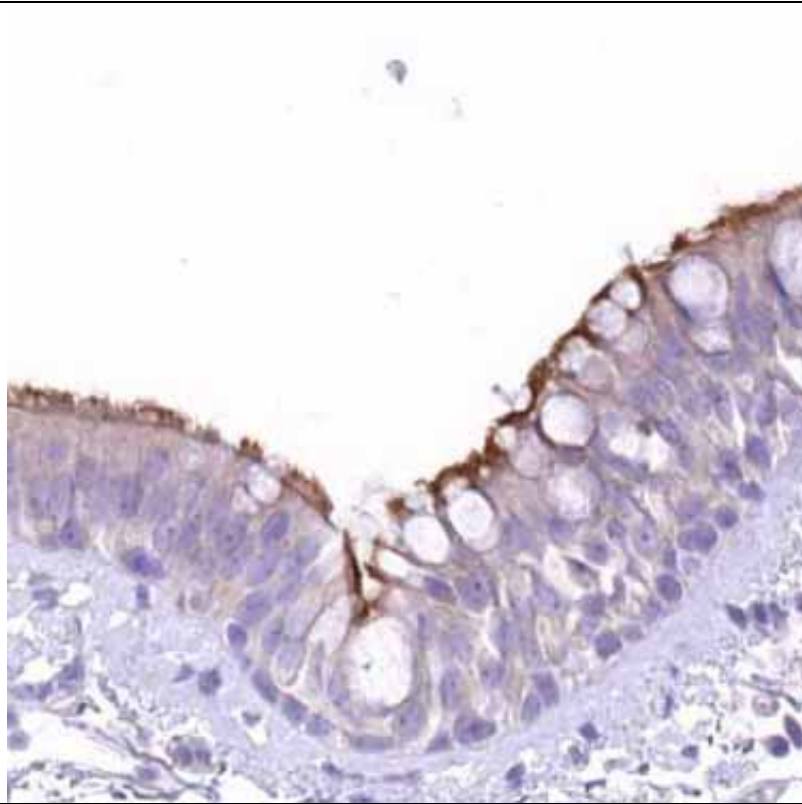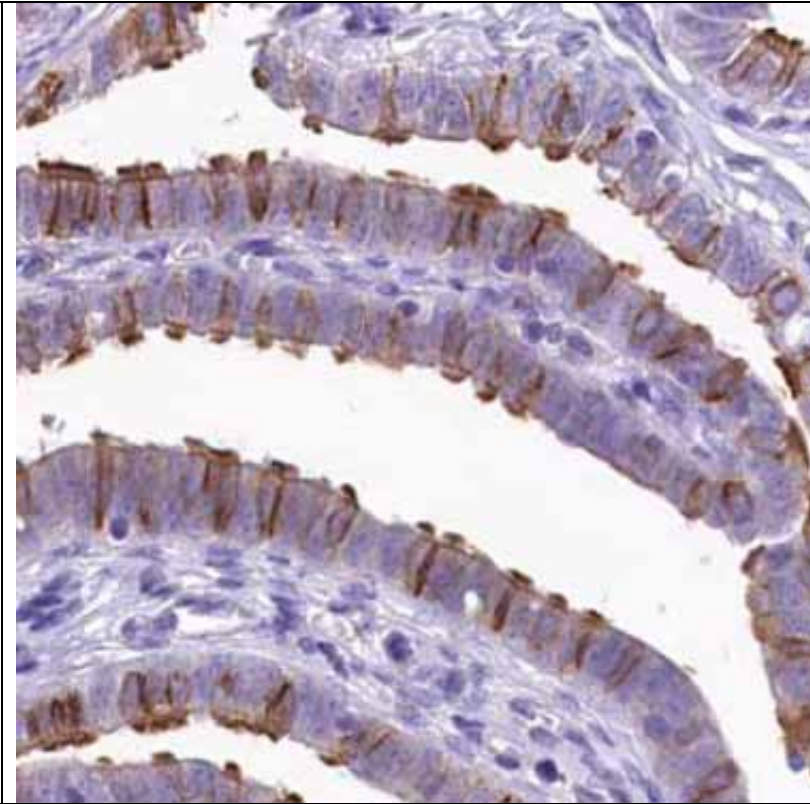

Staining is  
specific to  
*cilia*

LRRC48  
(antibody  
HPA036040)

Category 1

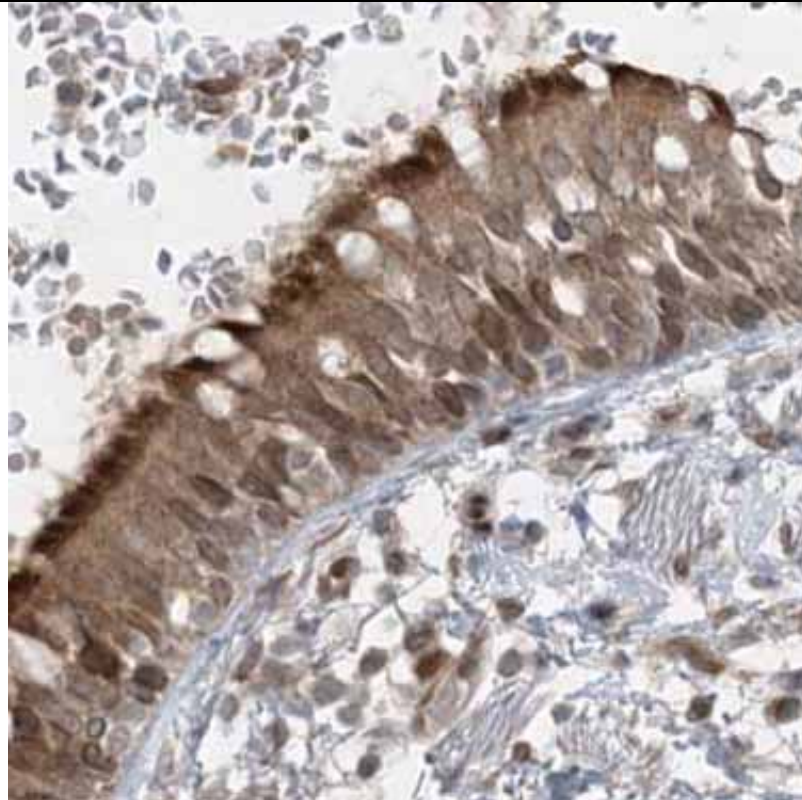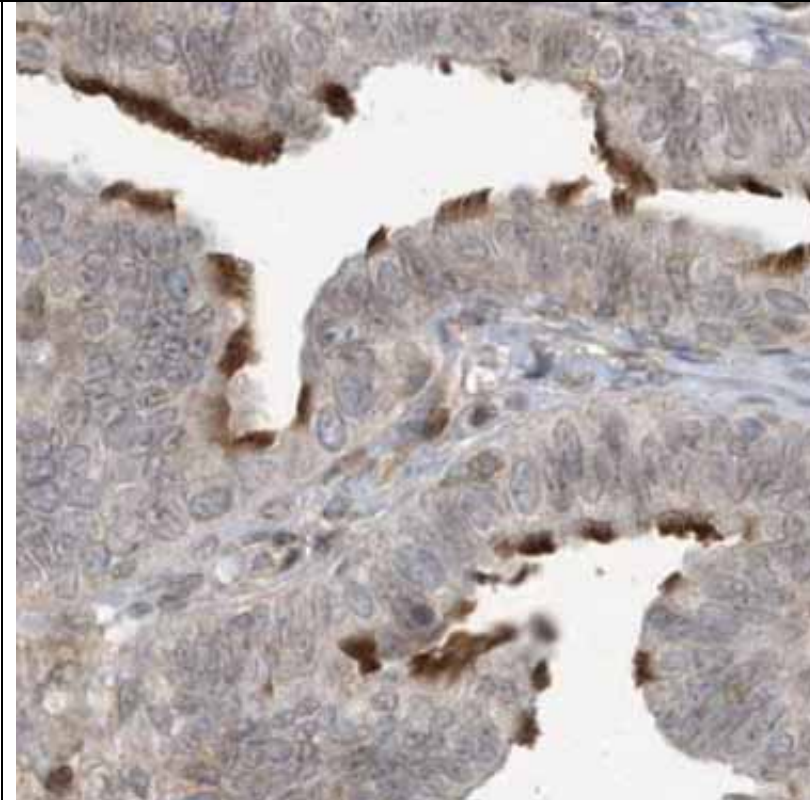

Staining is  
specific to  
*cilia*

MAP6  
(antibody  
CAB022600)

Category 1

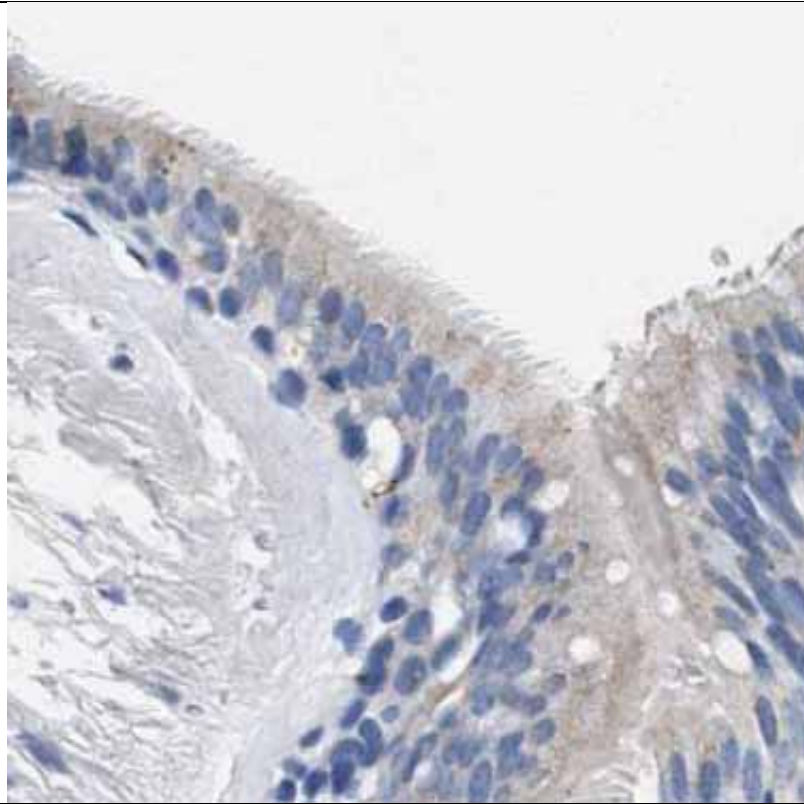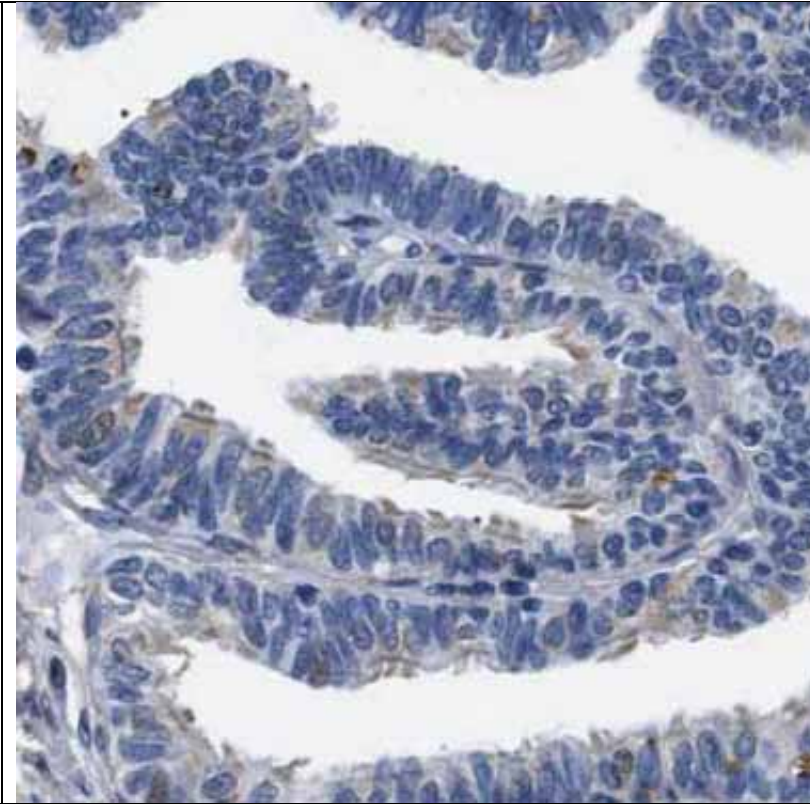

Staining is  
specific to  
*cilia*

MDH1B  
(antibody  
HPA034741)

Category 1

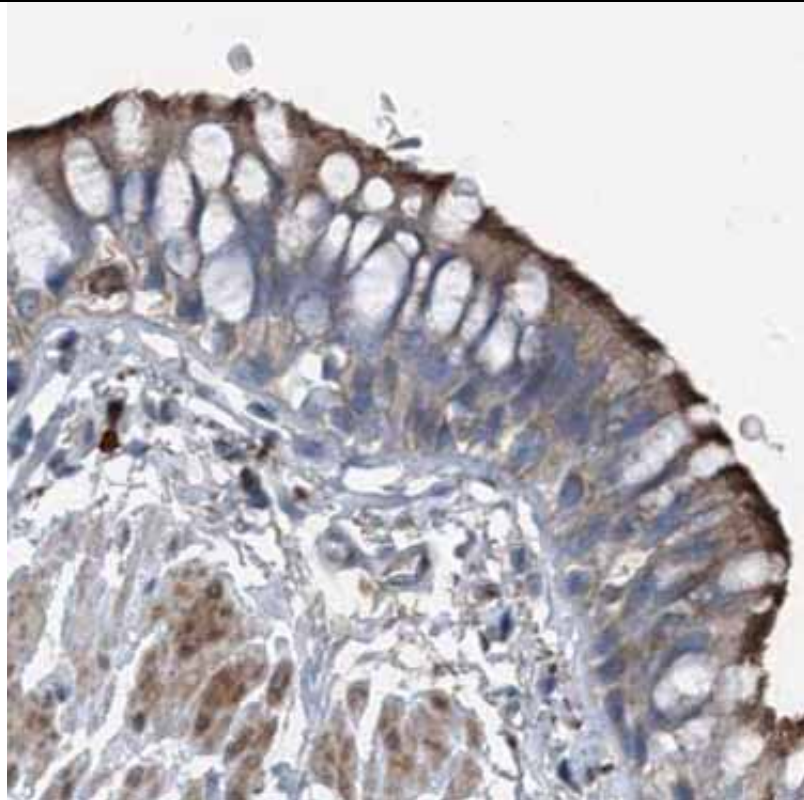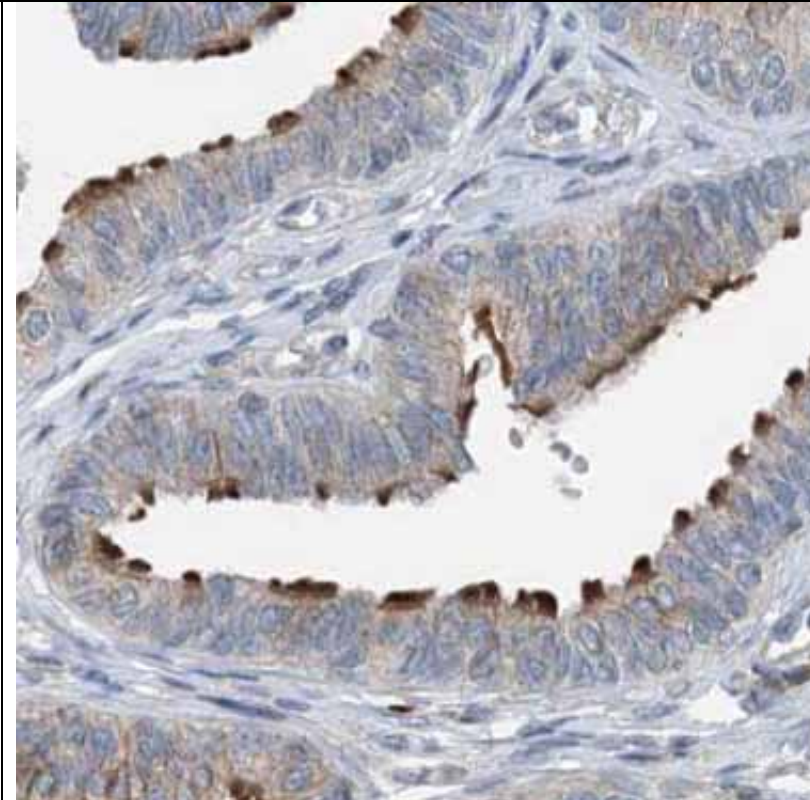

Staining is  
specific to  
*cilia*

MLF1  
(antibody  
HPA017903)

Category 1

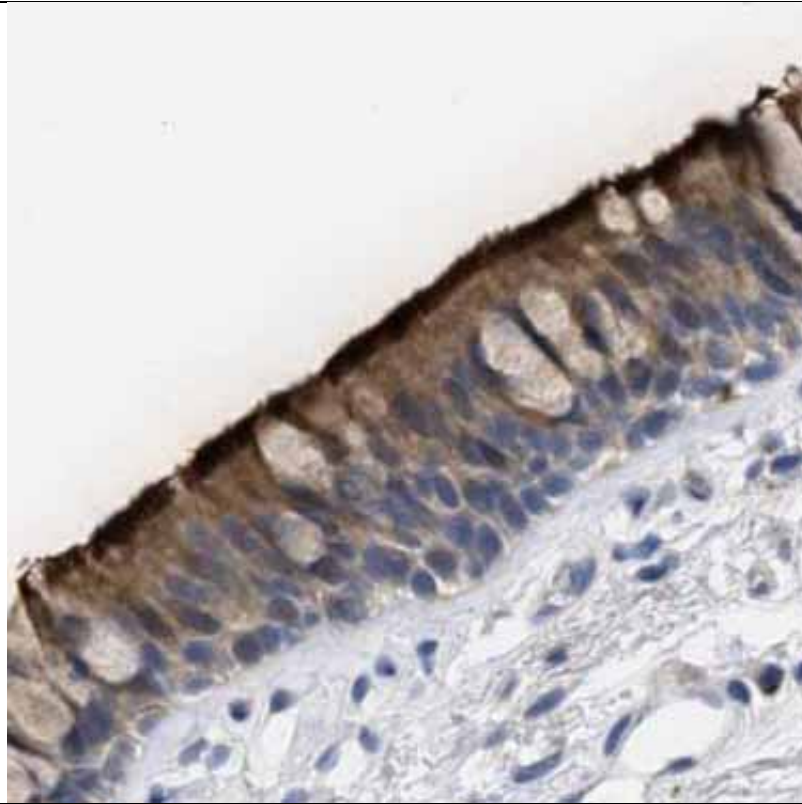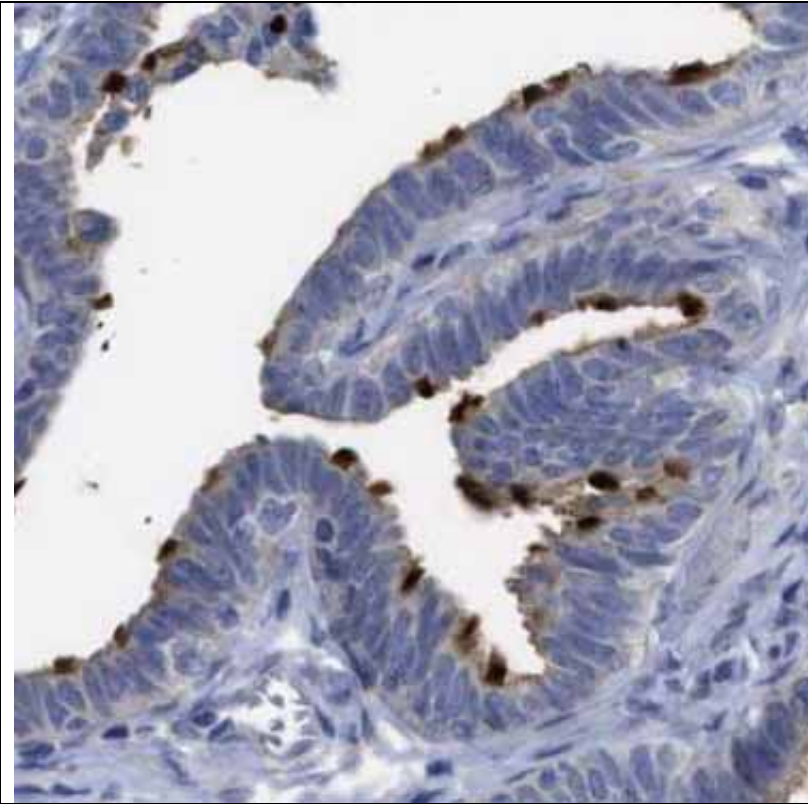

Staining is  
specific to  
*cilia*

MORN5  
(antibody  
HPA020930)

Category 1

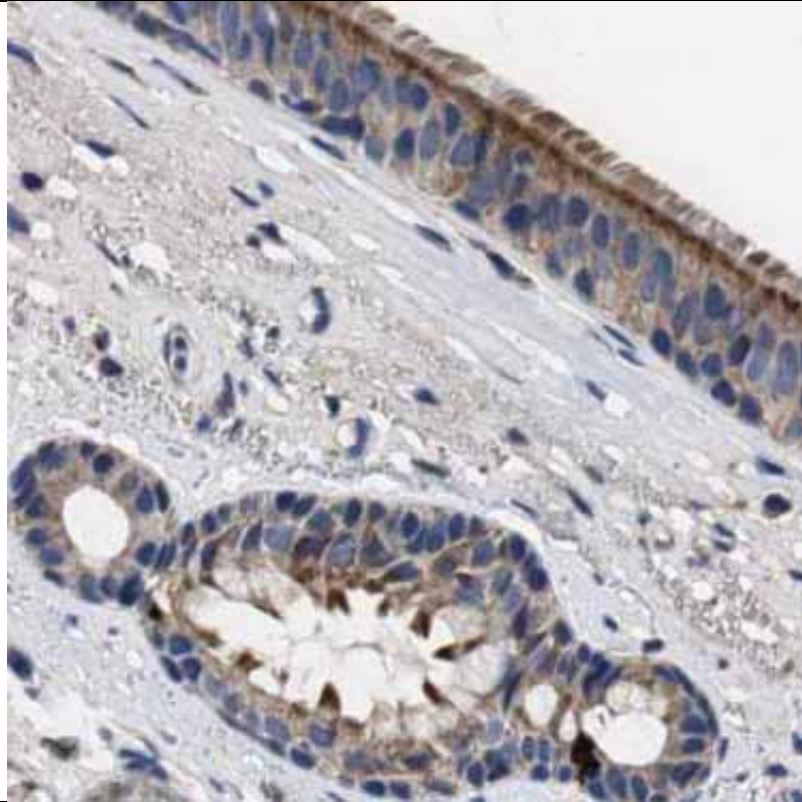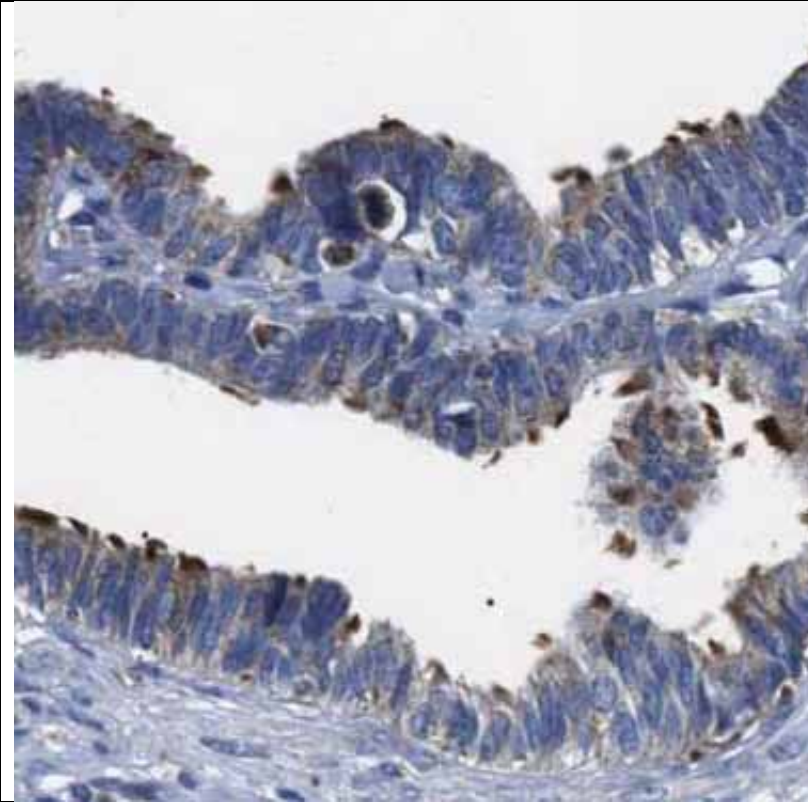

Staining is  
specific to  
*cilia*

MS4A8B  
(antibody  
HPA007318)

Category 1

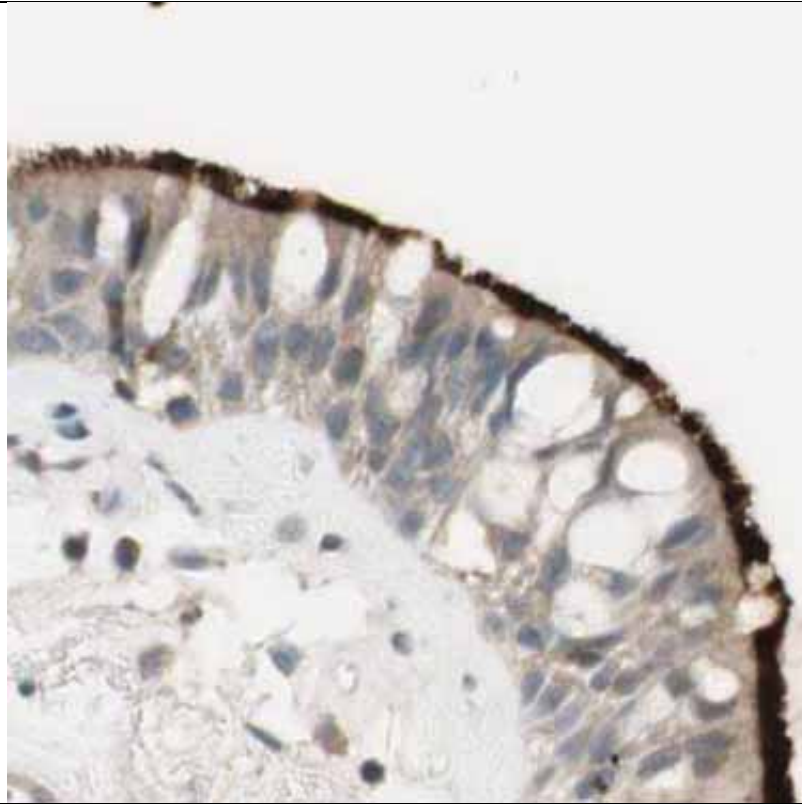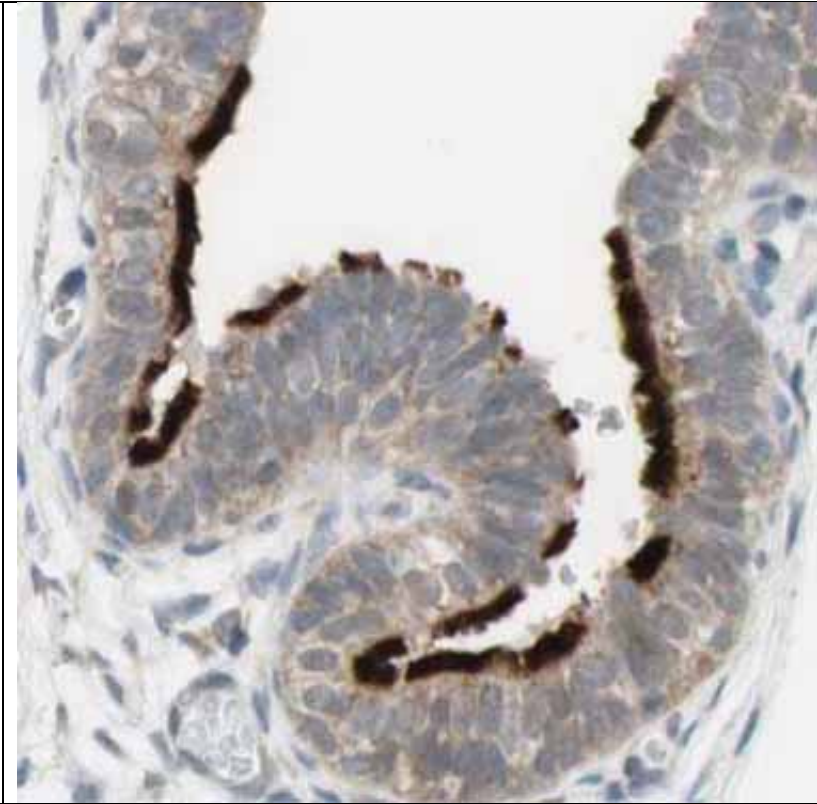

Staining is  
specific to  
*cilia*

PPIL6  
(antibody  
HPA036717)

Category 1

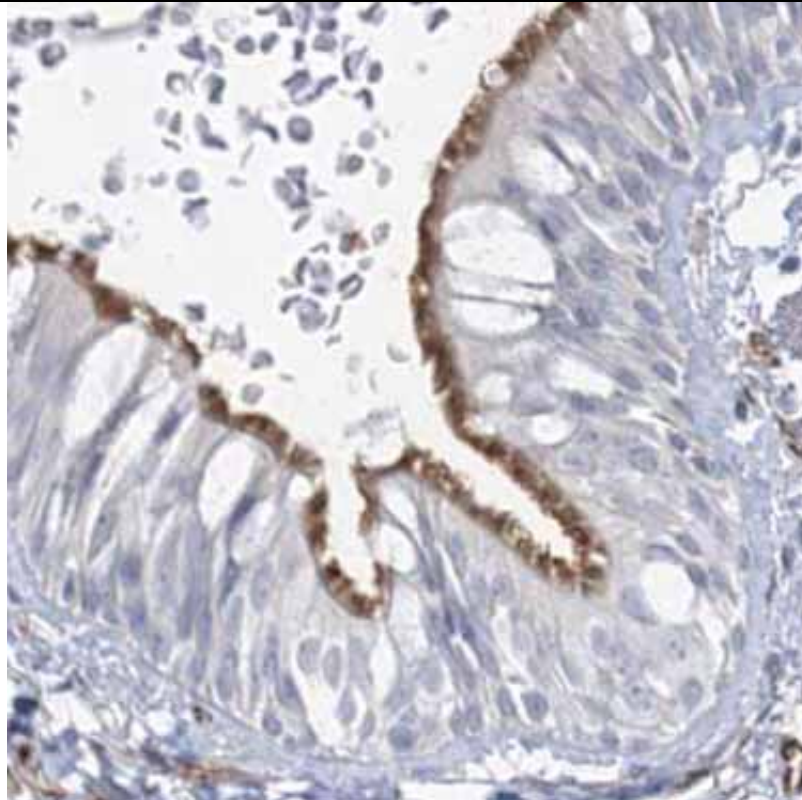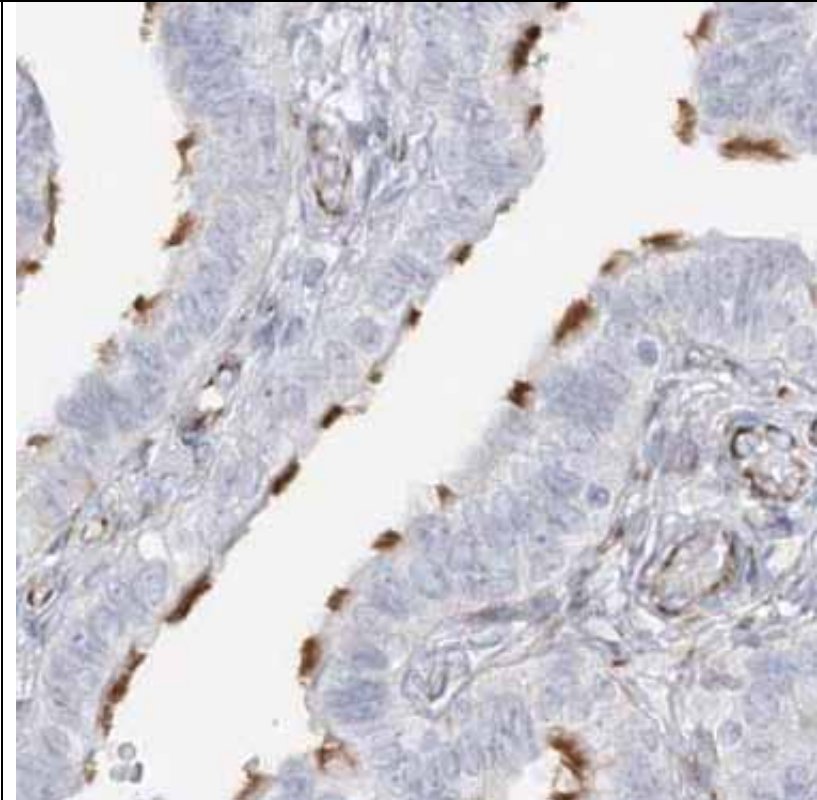

Staining is  
specific to  
*cilia*



PROM1  
(antibody  
HPA031053)

Category 1

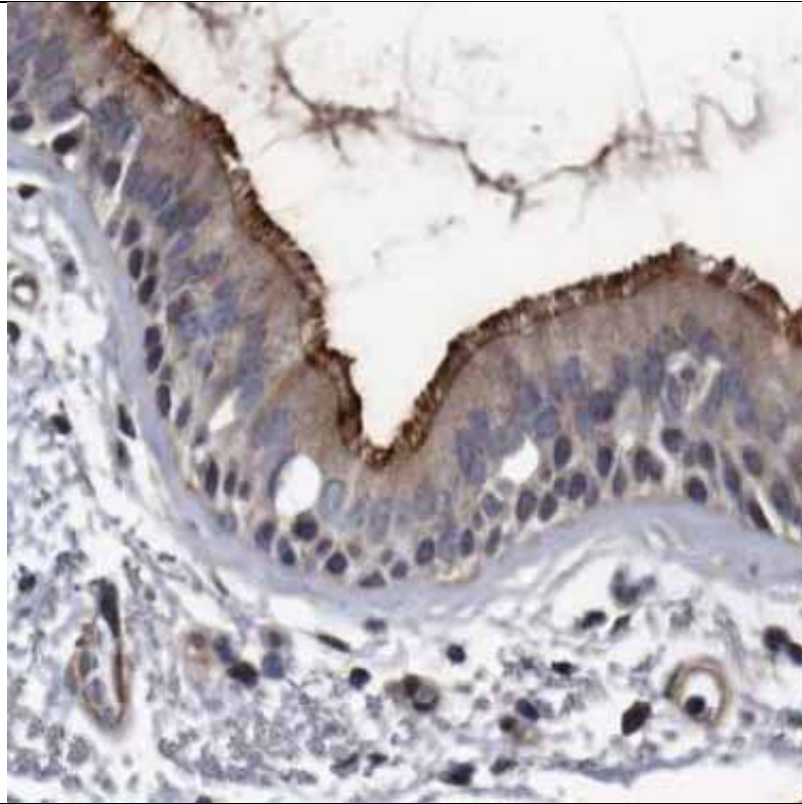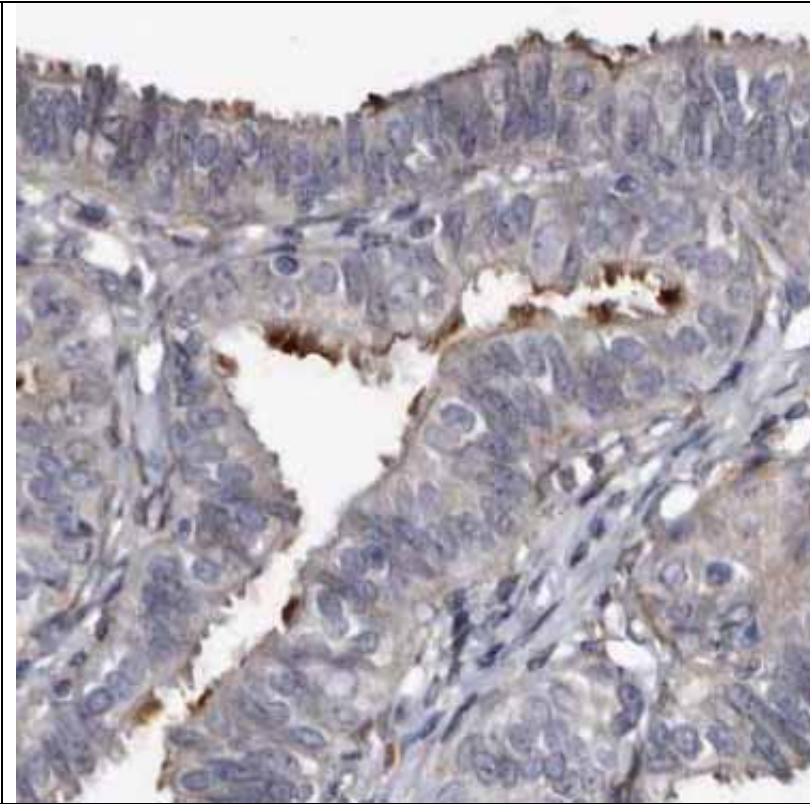

Staining is  
specific to  
*cilia*

RIBC2  
(antibody  
HPA003210)

Category 1

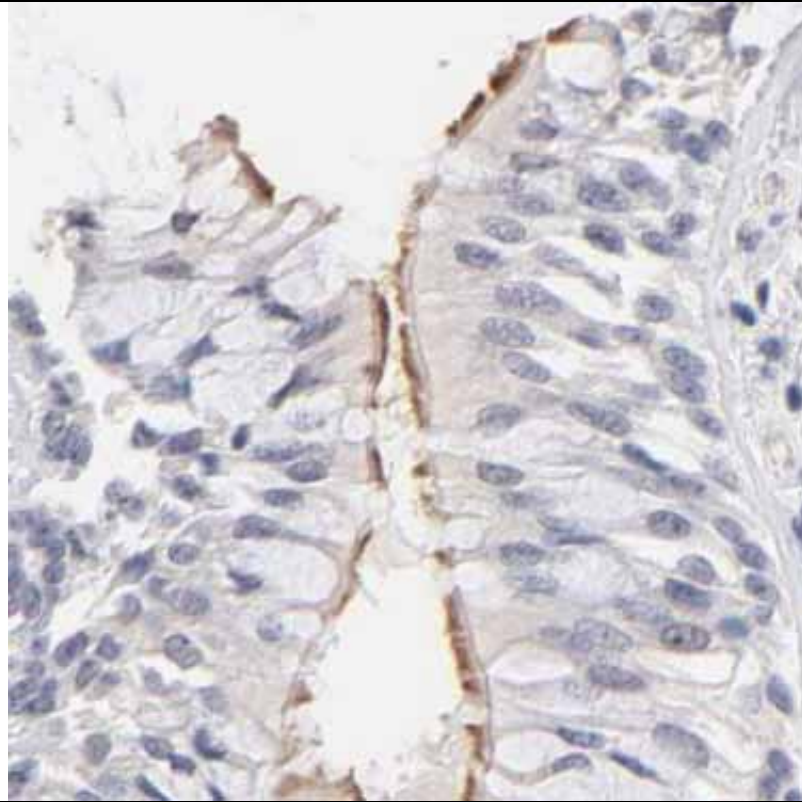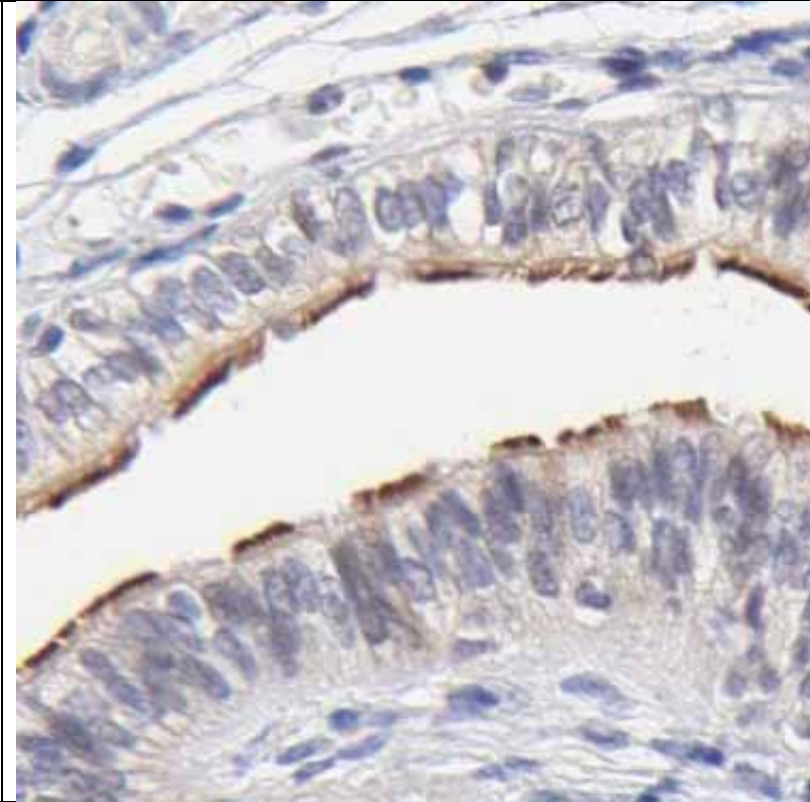

Staining is  
specific to  
*cilia*

ROPN1L  
(antibody  
HPA039193)

Category 1

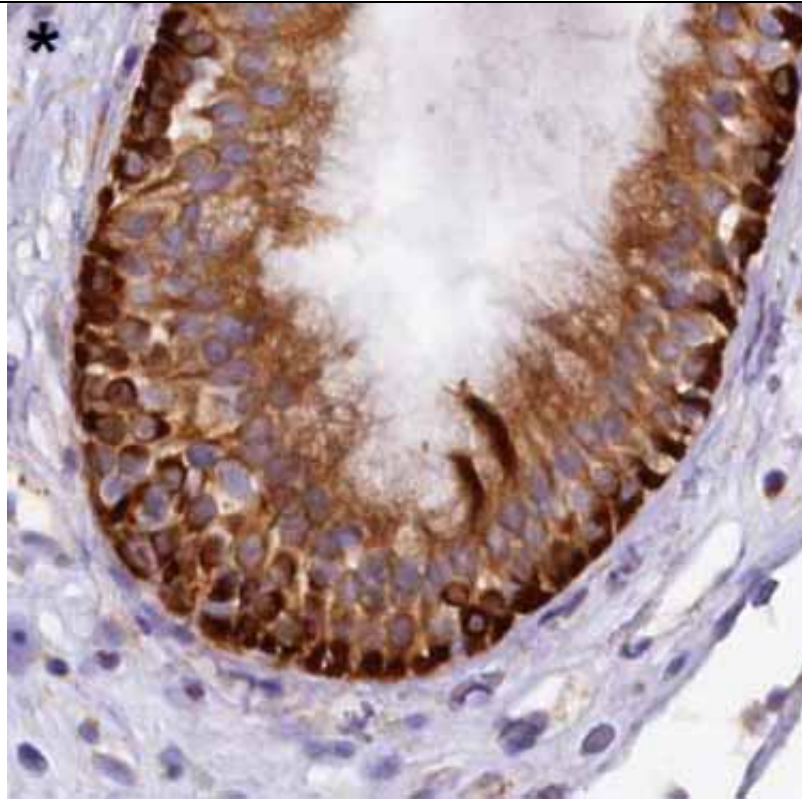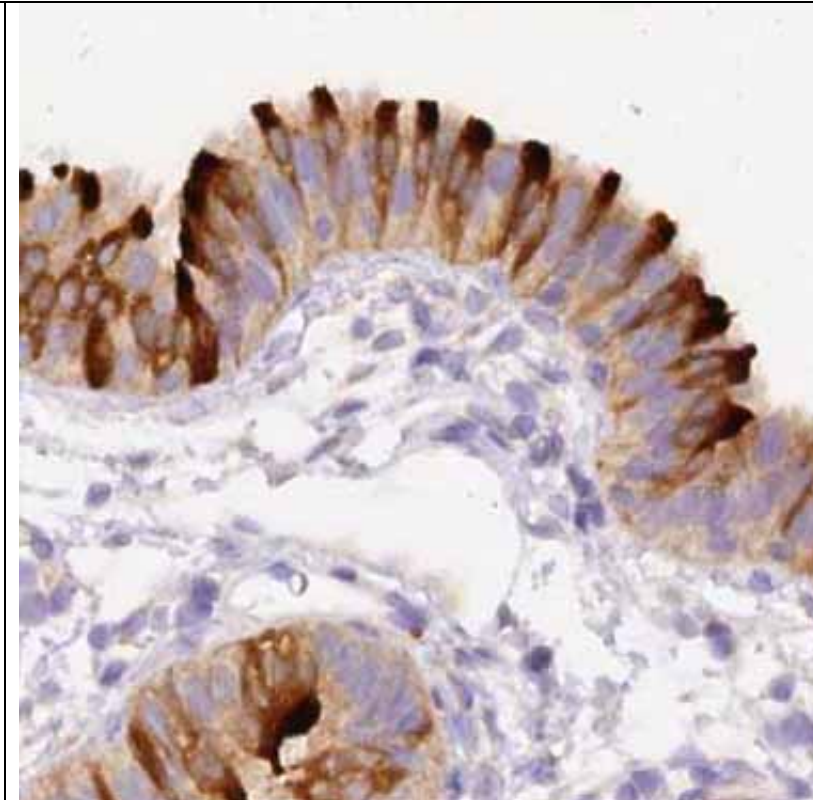

Staining is  
specific to  
*cilia*

RPGR  
(antibody  
HPA001593)

Category 1

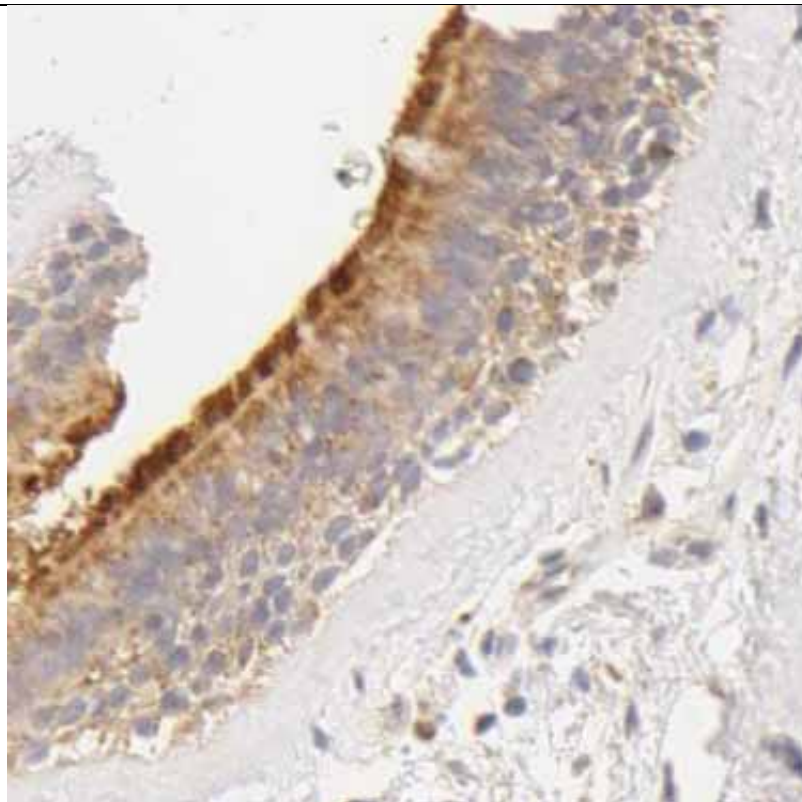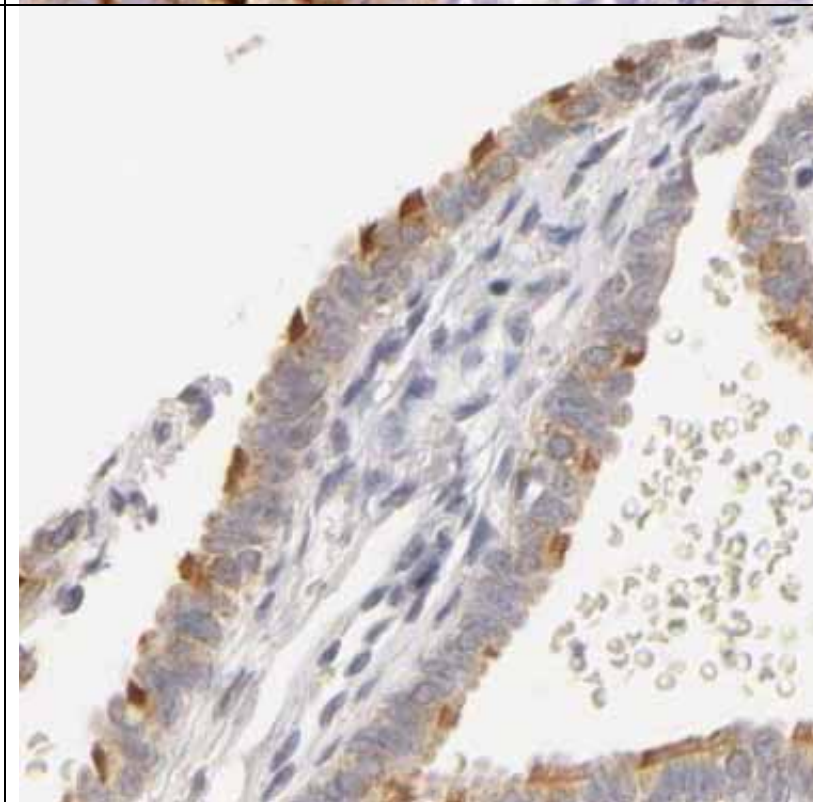

Staining is  
specific to  
*cilia*

RSPH1  
(antibody  
HPA016816)

Category 1

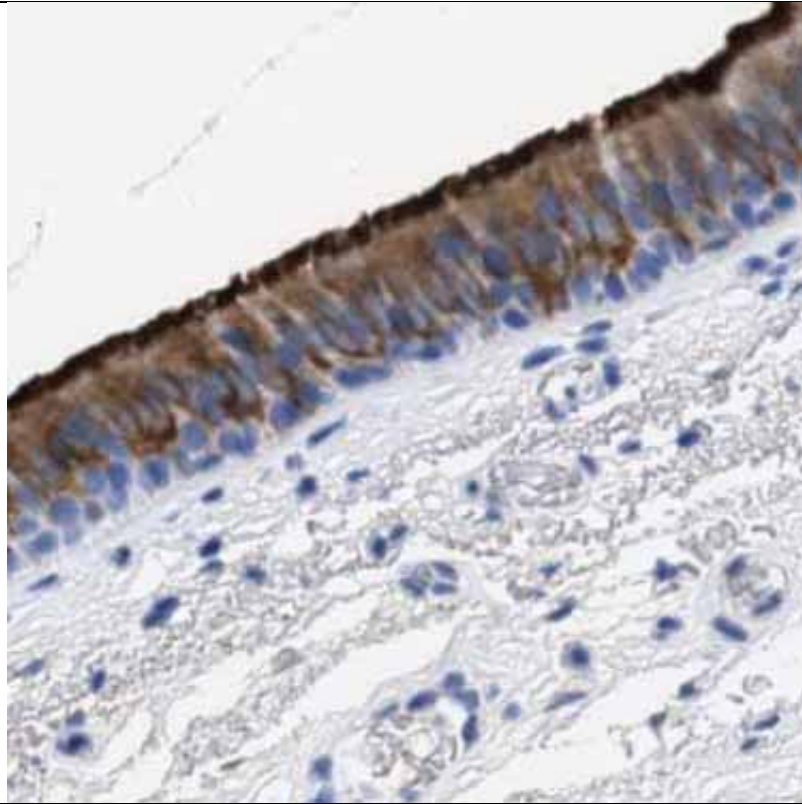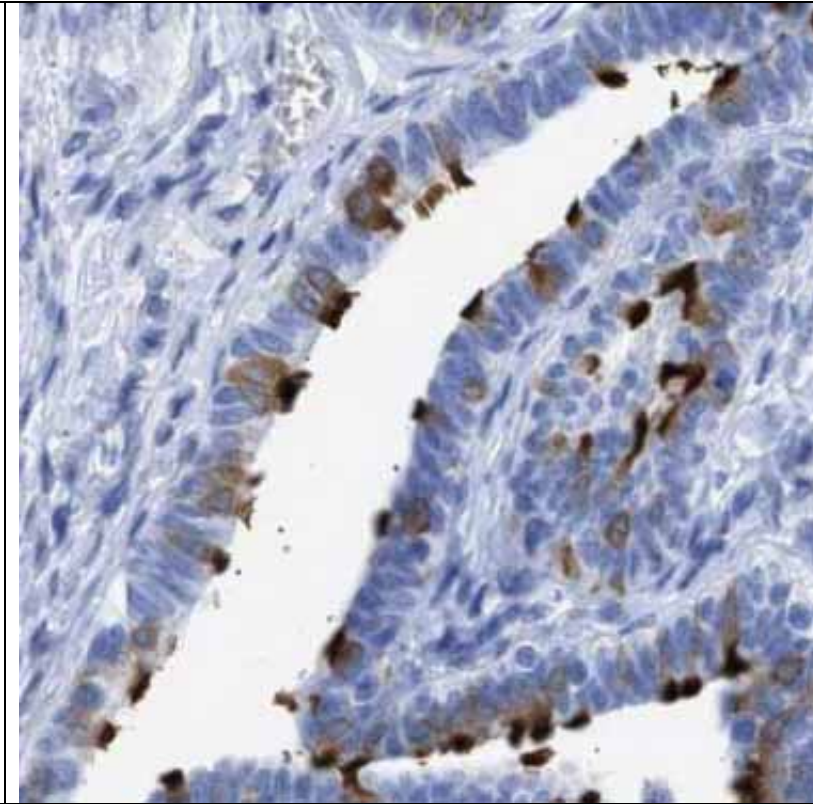

Staining is  
specific to  
*cilia*

RSPH4A  
(antibody  
HPA031196)

Category 1

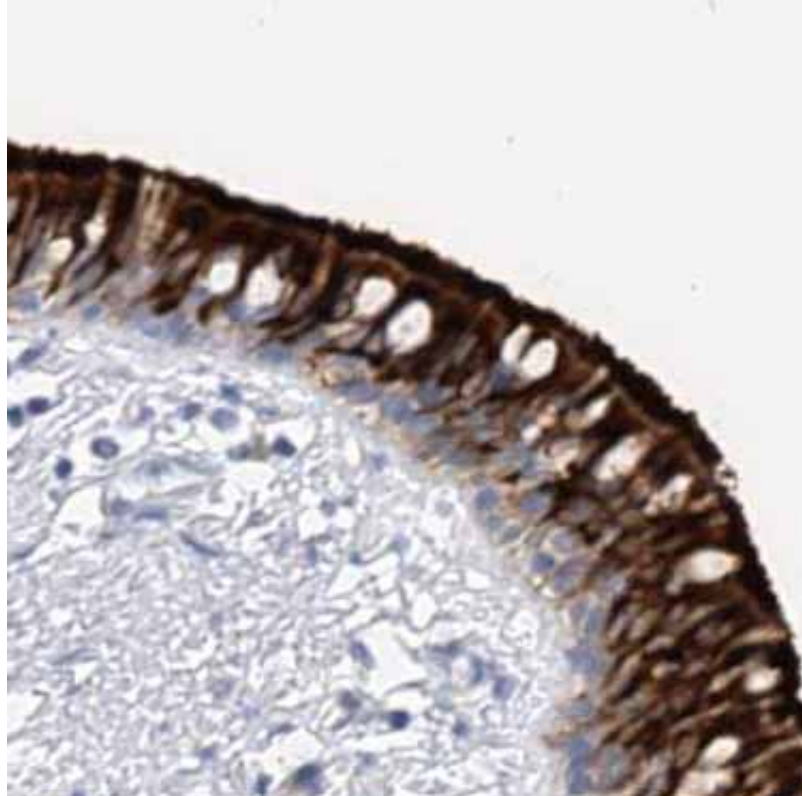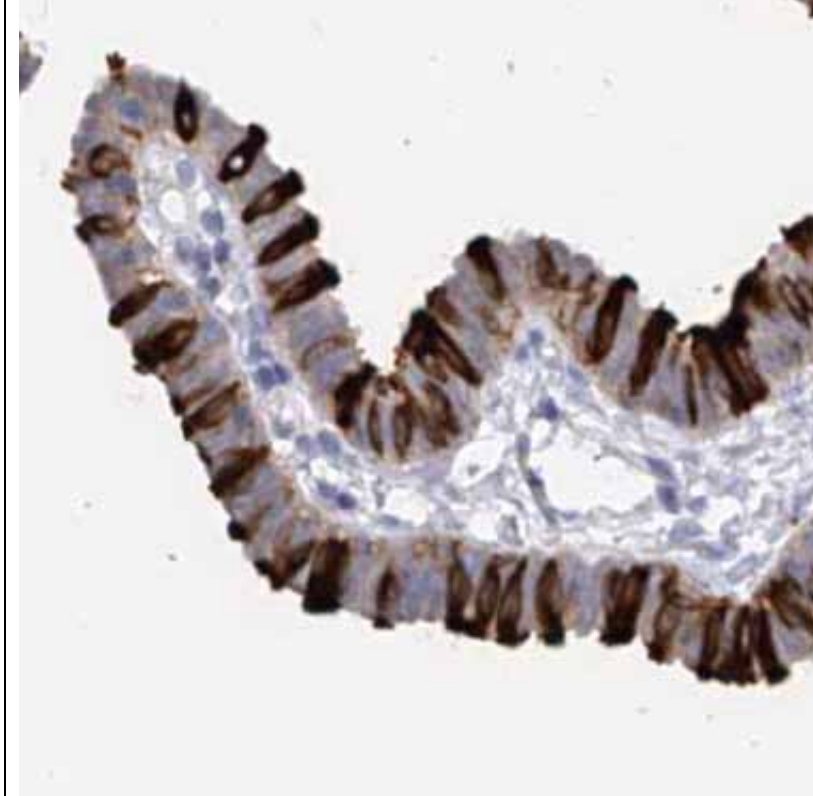

Staining is  
specific to  
*cilia*

RSPH9  
(antibody  
HPA031703)

Category 1

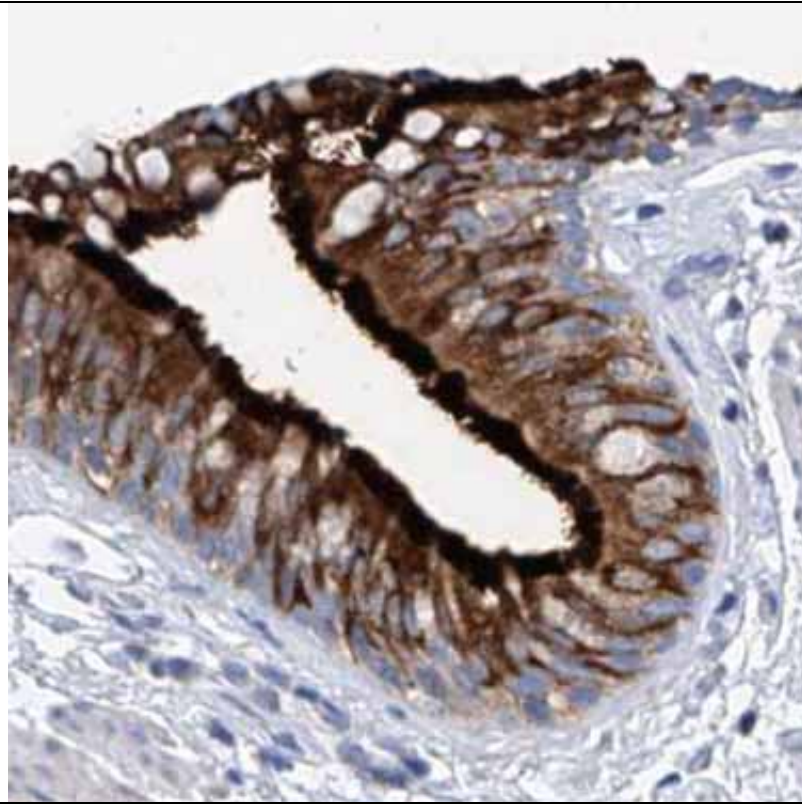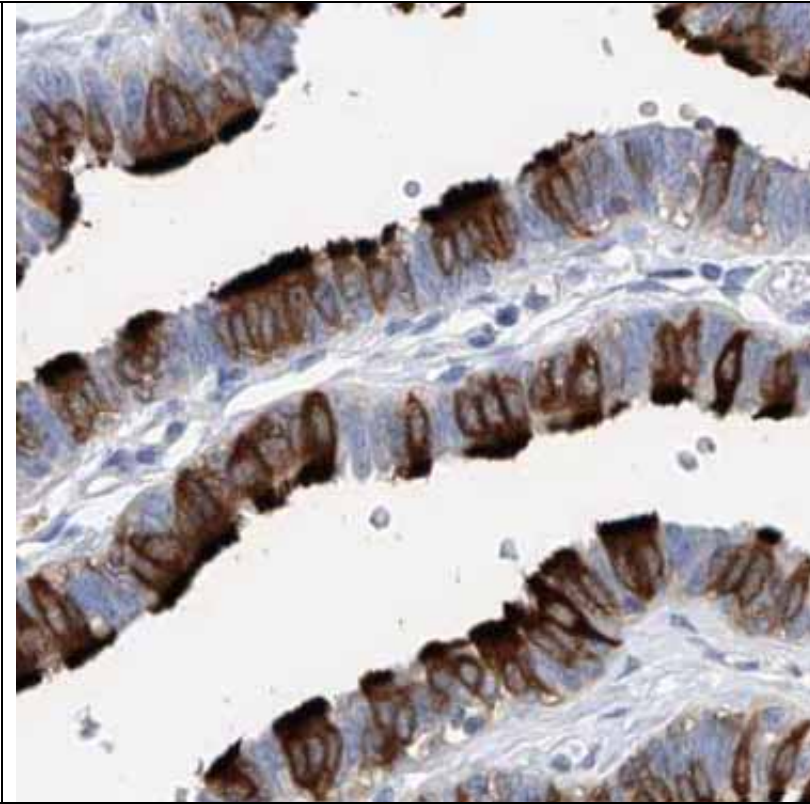

Staining is  
specific to  
*cilia*

RTDR1  
(antibody  
HPA018420)

Category 1

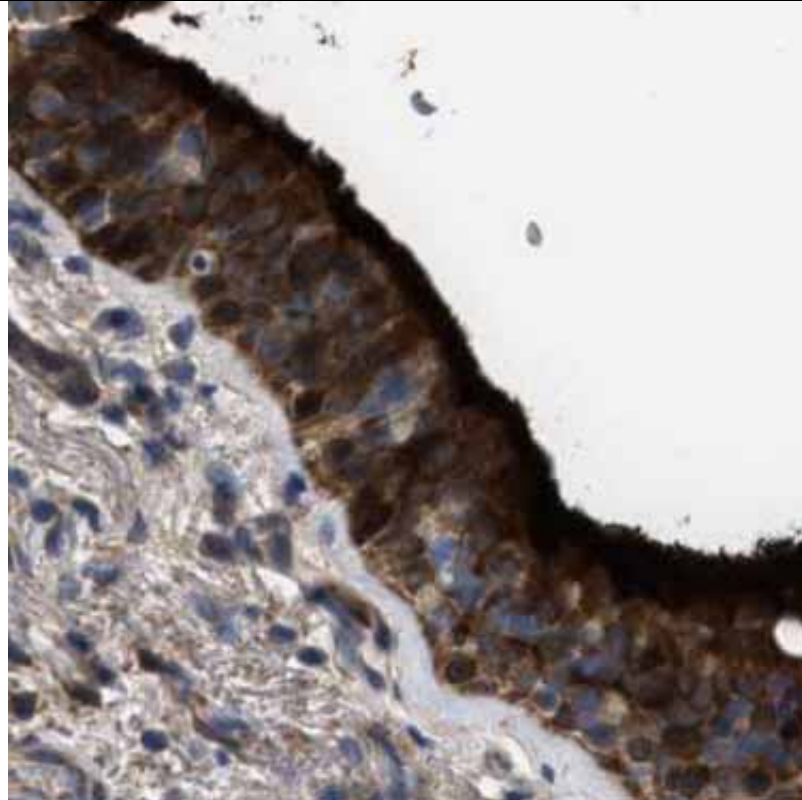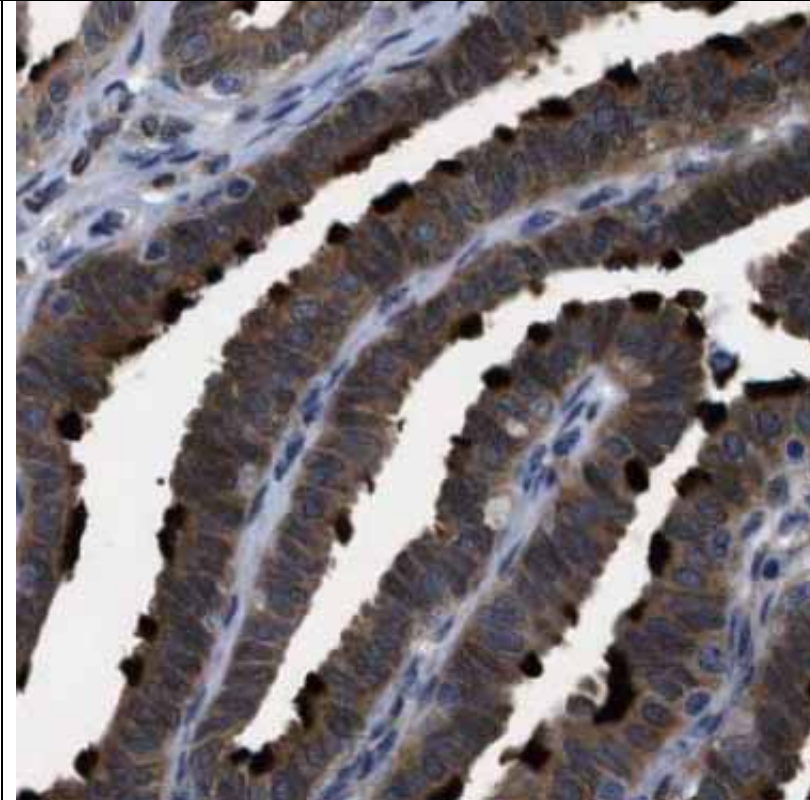

Staining is  
specific to  
*cilia*

SPA17  
(antibody  
HPA037568)

Category 1

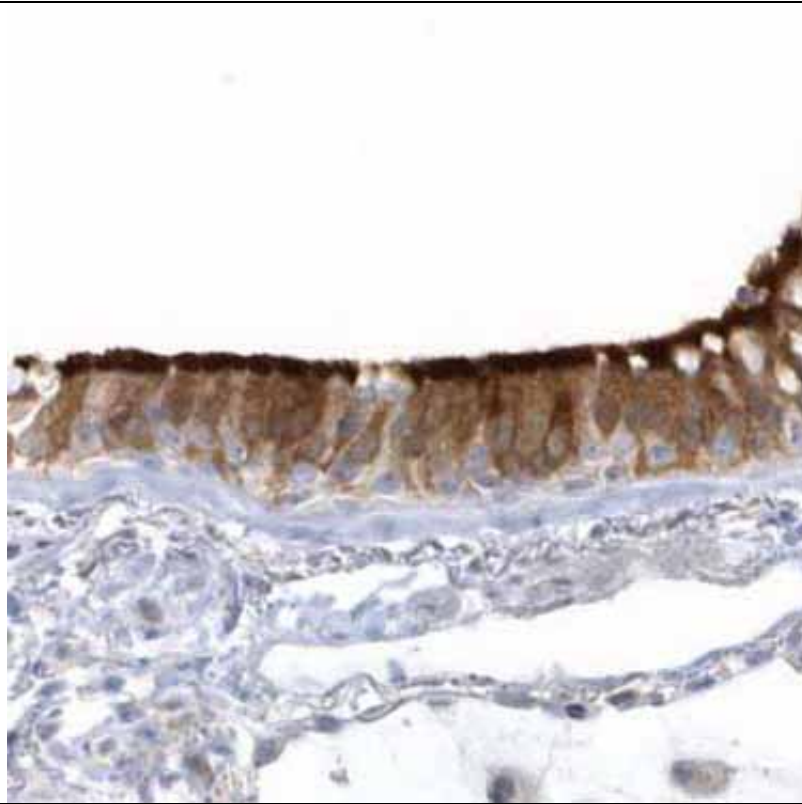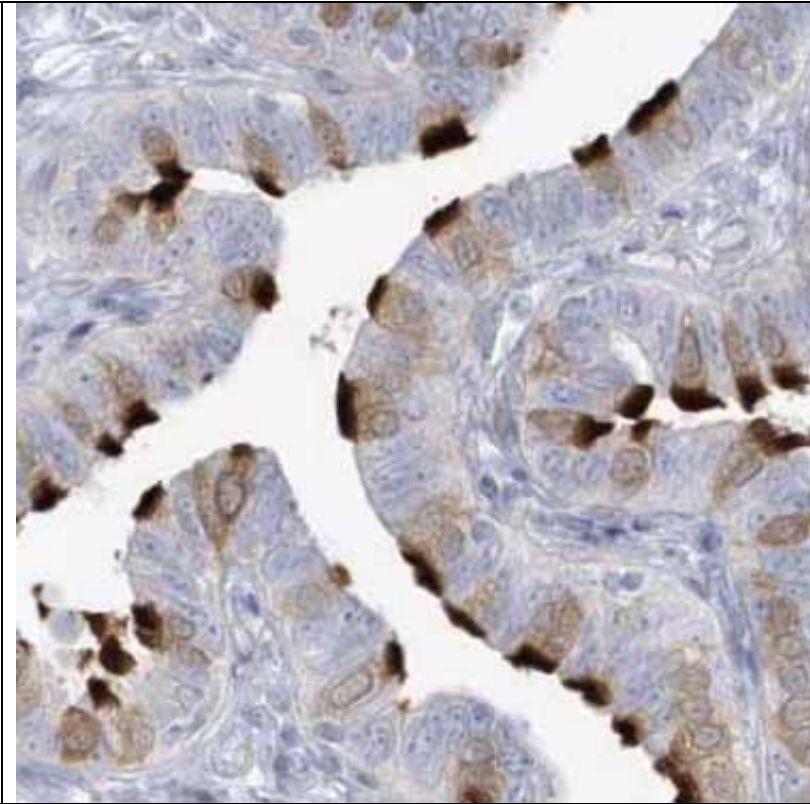

Staining is  
specific to  
*cilia*

SPAG6  
(antibody  
HPA038440)

Category 1

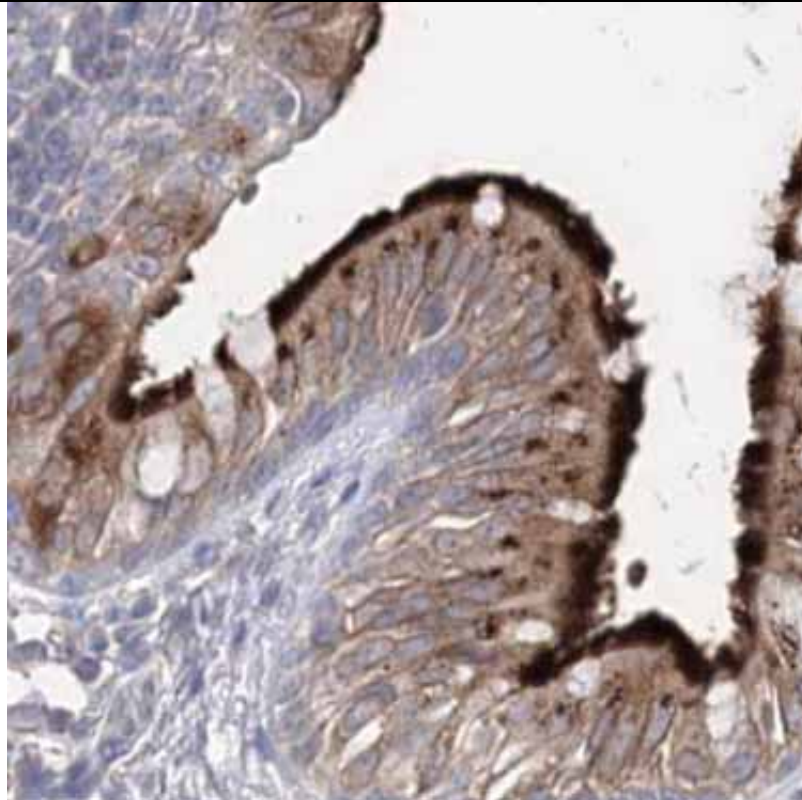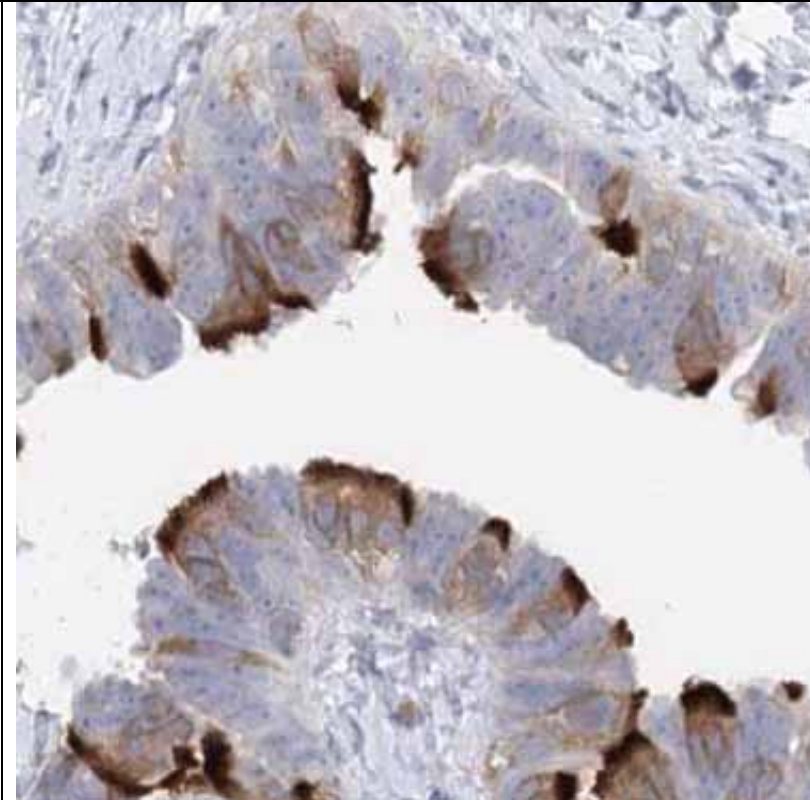

Staining is  
specific to  
*cilia*

SPATA17  
(antibody  
HPA030099)

Category 1

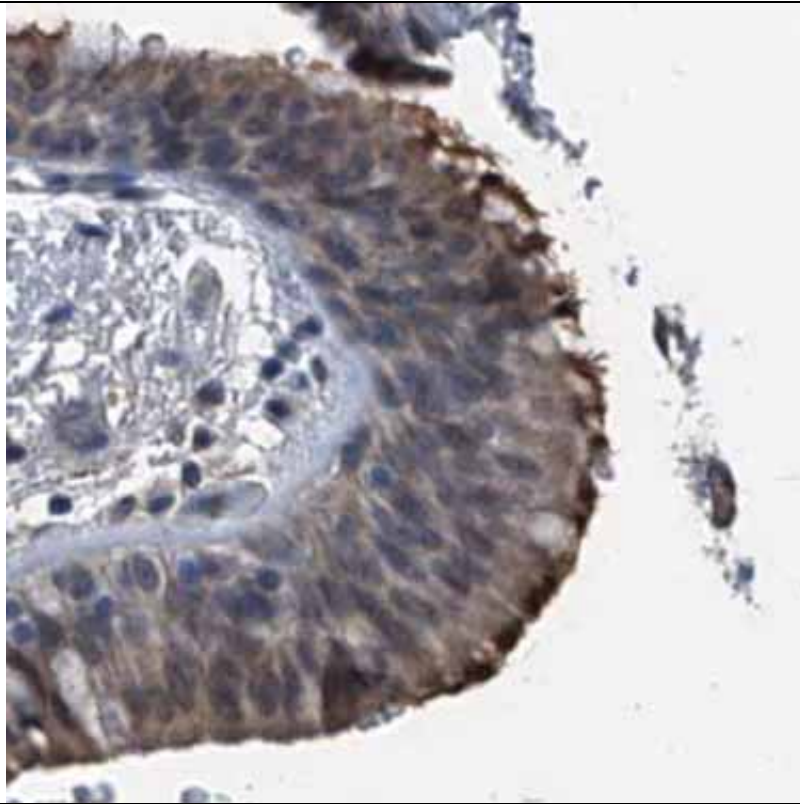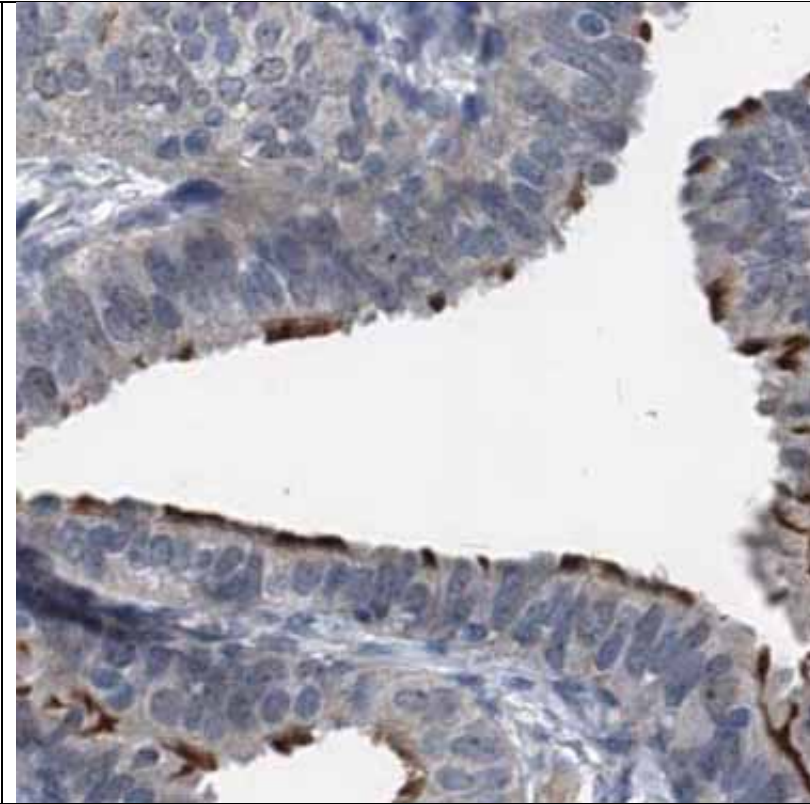

Staining is  
specific to  
*cilia*

SPEF2  
(antibody  
HPA039606)

Category 1

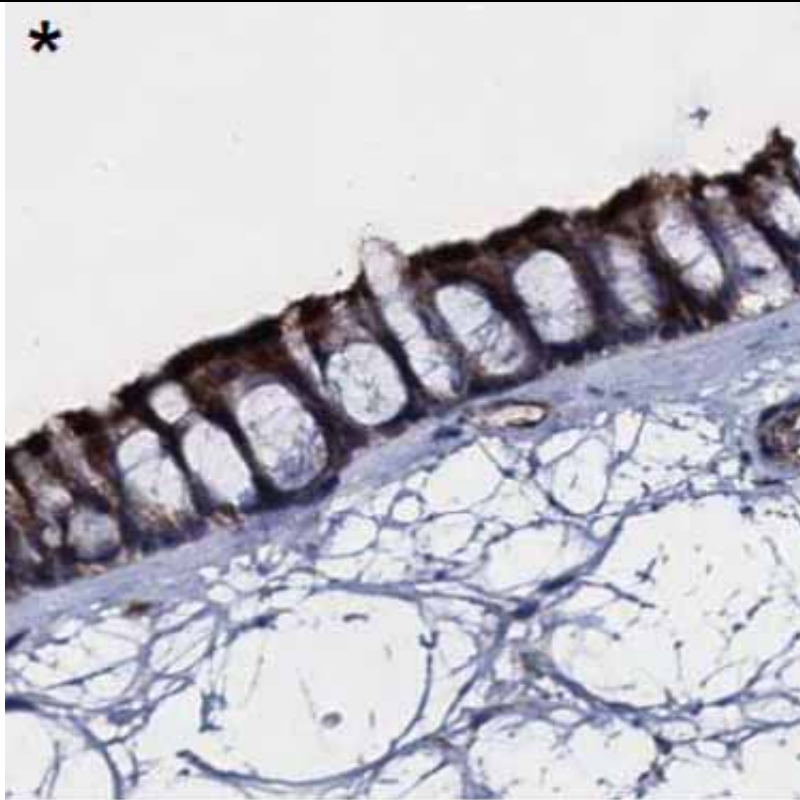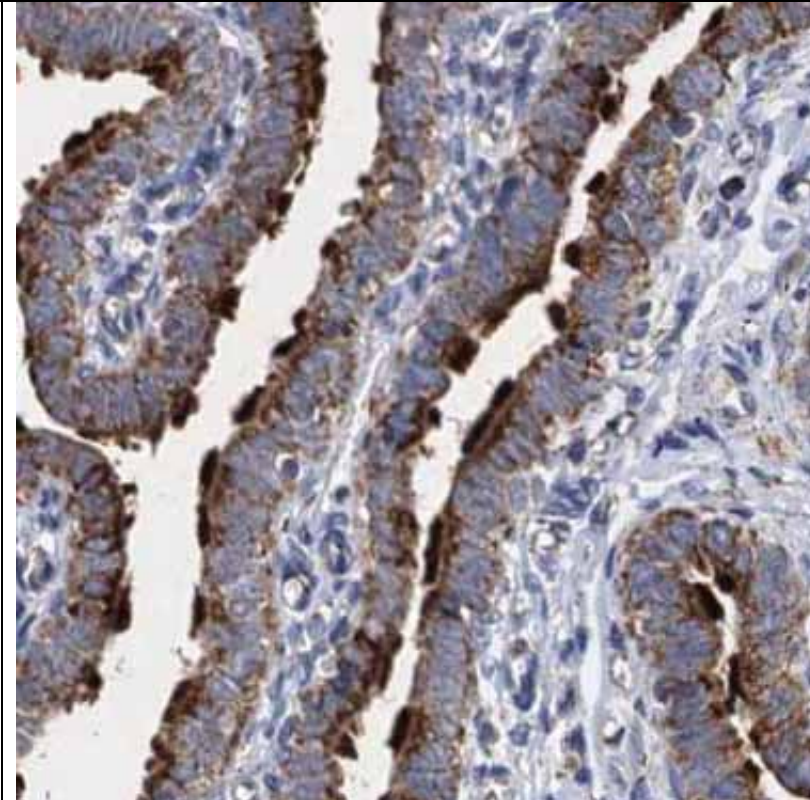

Staining is  
specific to  
*cilia*

SRGAP3  
(antibody  
HPA036959)

Category 1

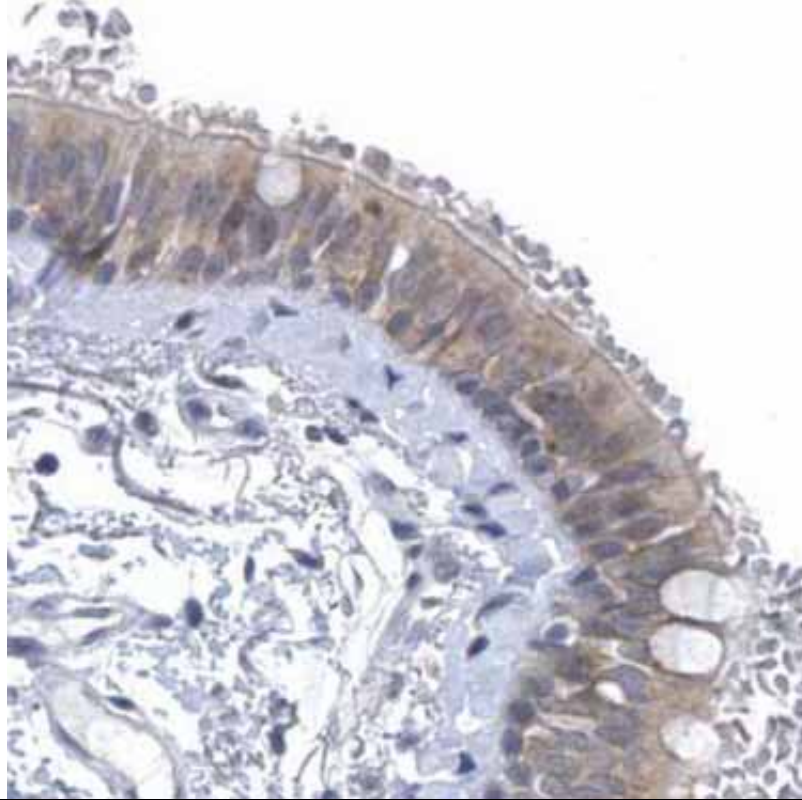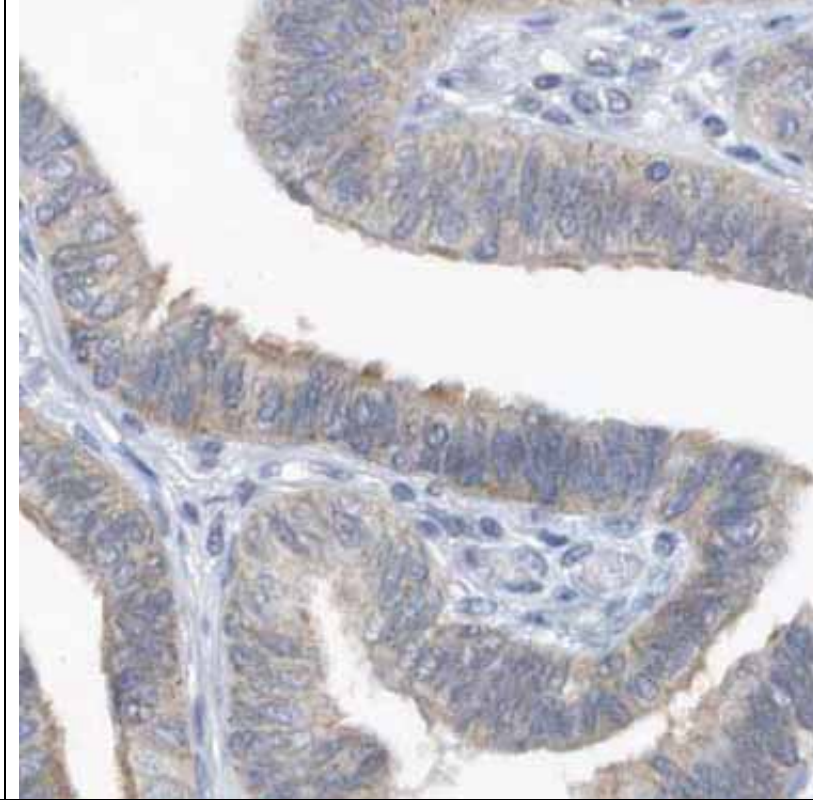

Staining is  
specific to  
*cilia*

STOML3  
(antibody  
CAB014880)

Category 1

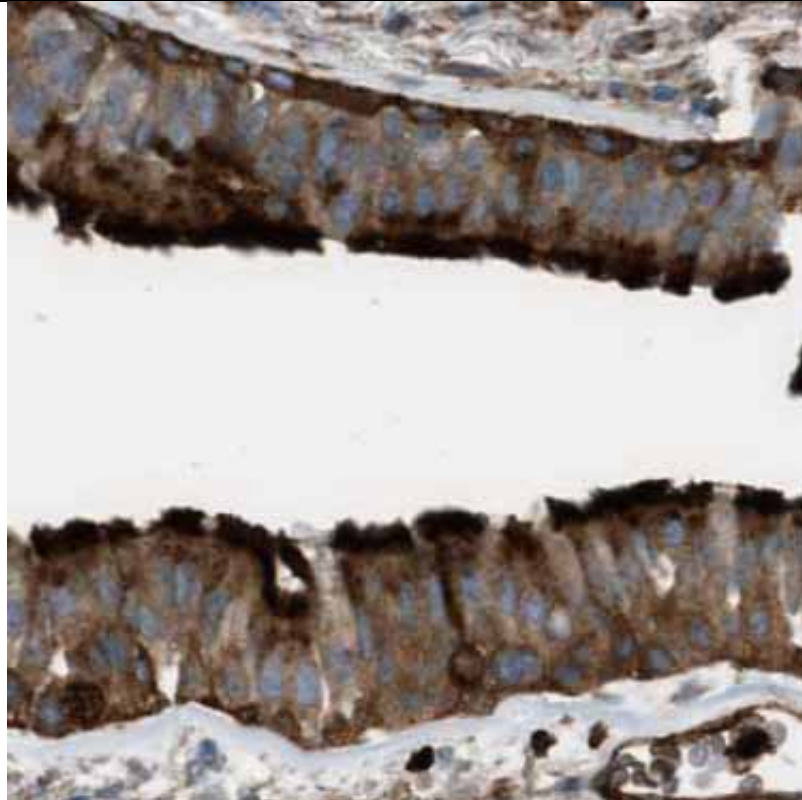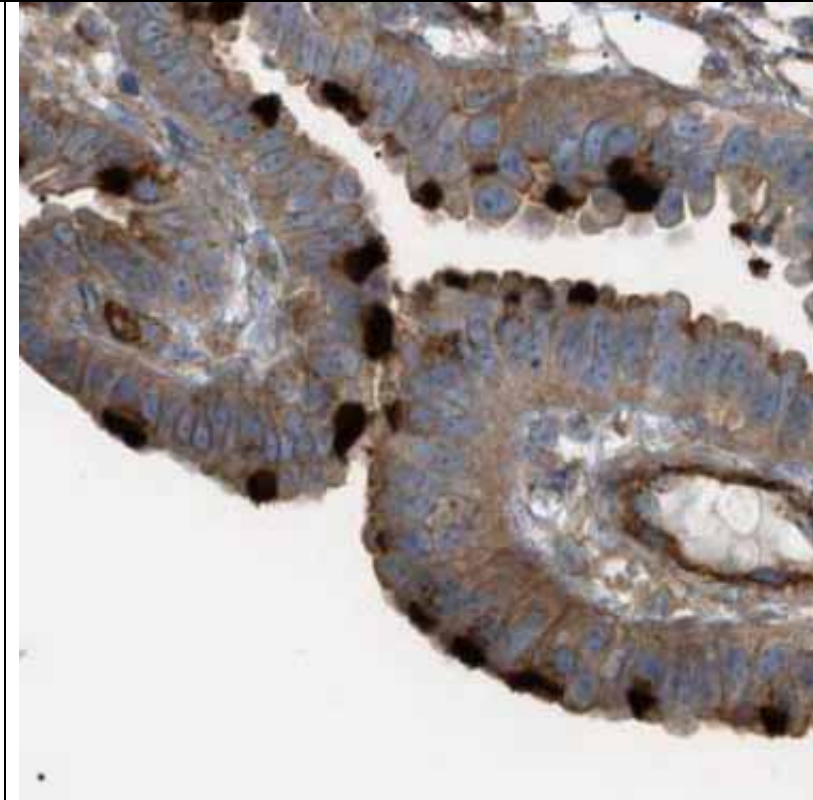

Staining is  
specific to  
*cilia*

TCTEX1D1  
(antibody  
HPA028420)

Category 1

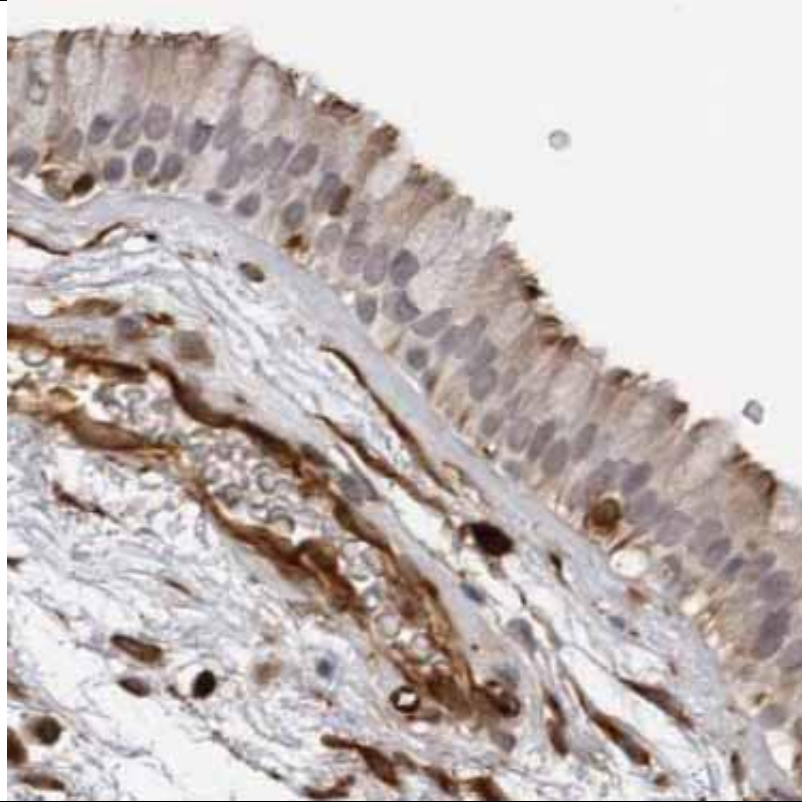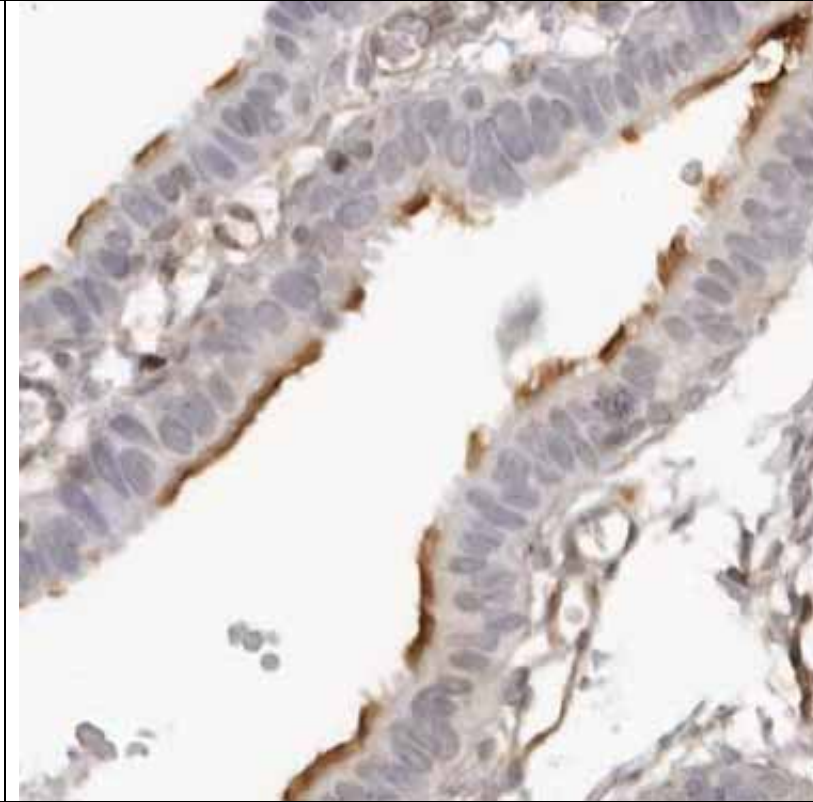

Staining is  
specific to  
*cilia*

TEKT2  
(antibody  
HPA027461)

Category 1

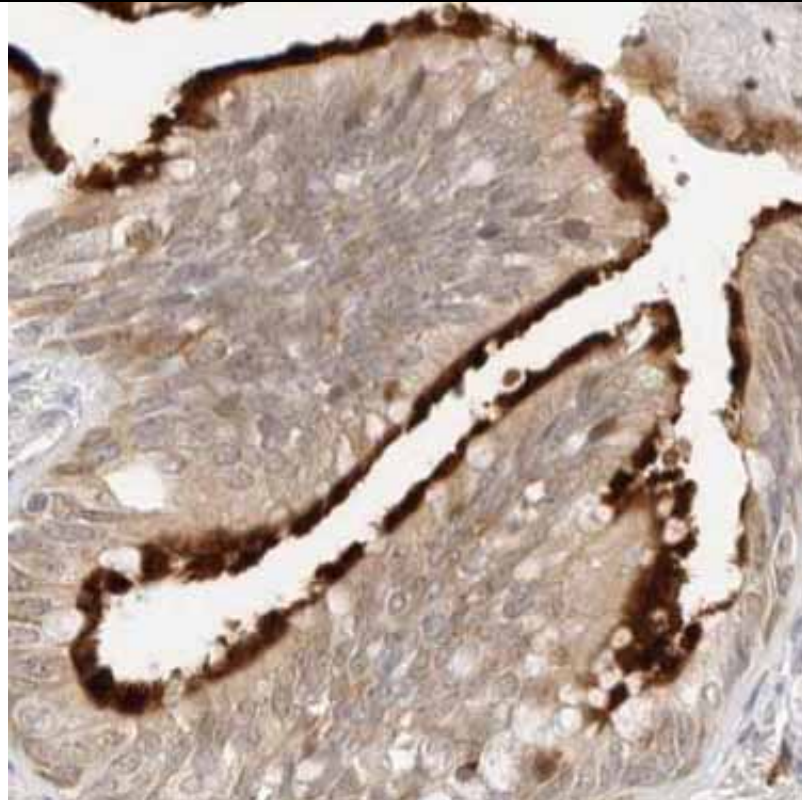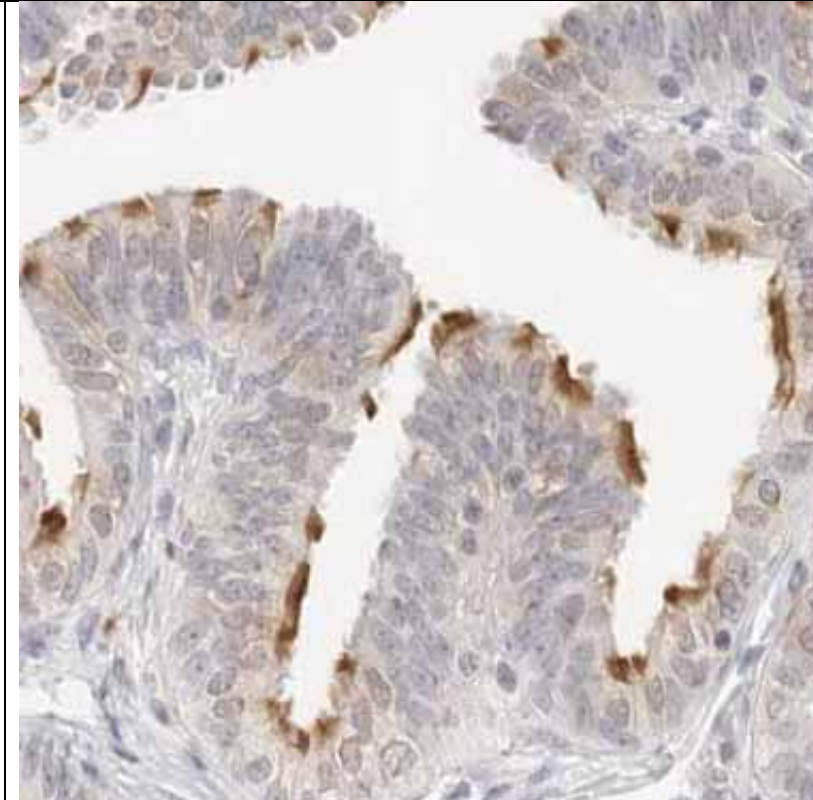

Staining is  
specific to  
*cilia*



TEX9  
(antibody  
HPA039415)

Category 1

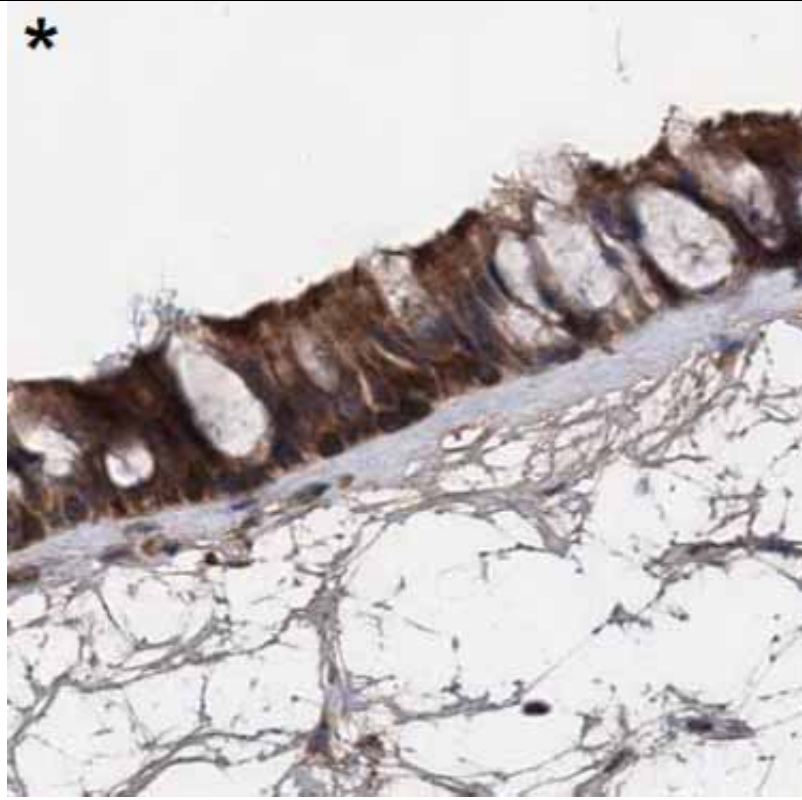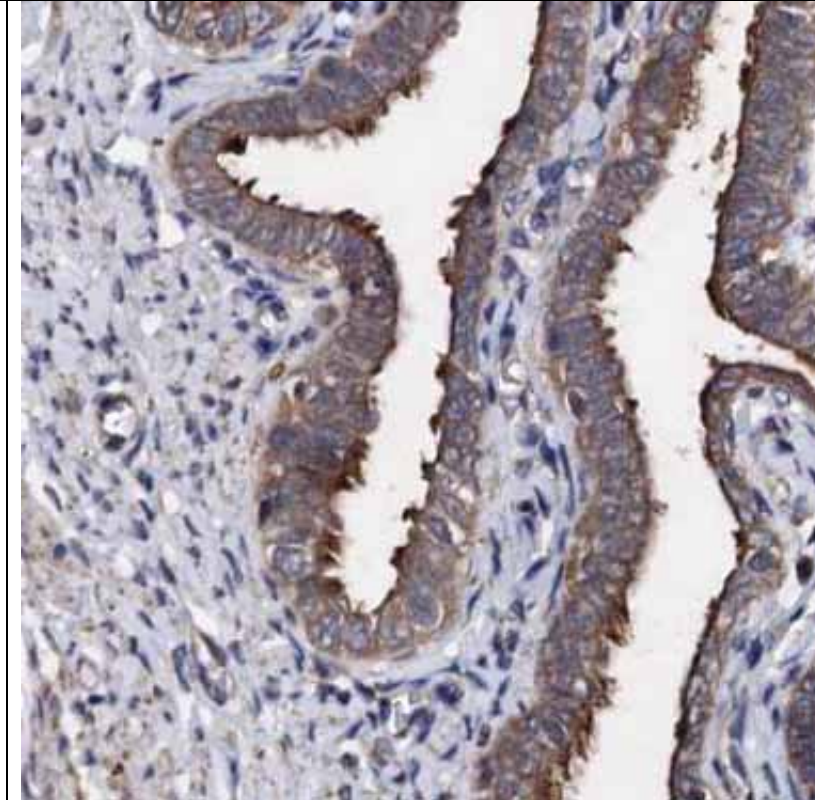

Staining is  
specific to  
*cilia*

TTC18  
(antibody  
HPA037581)

Category 1

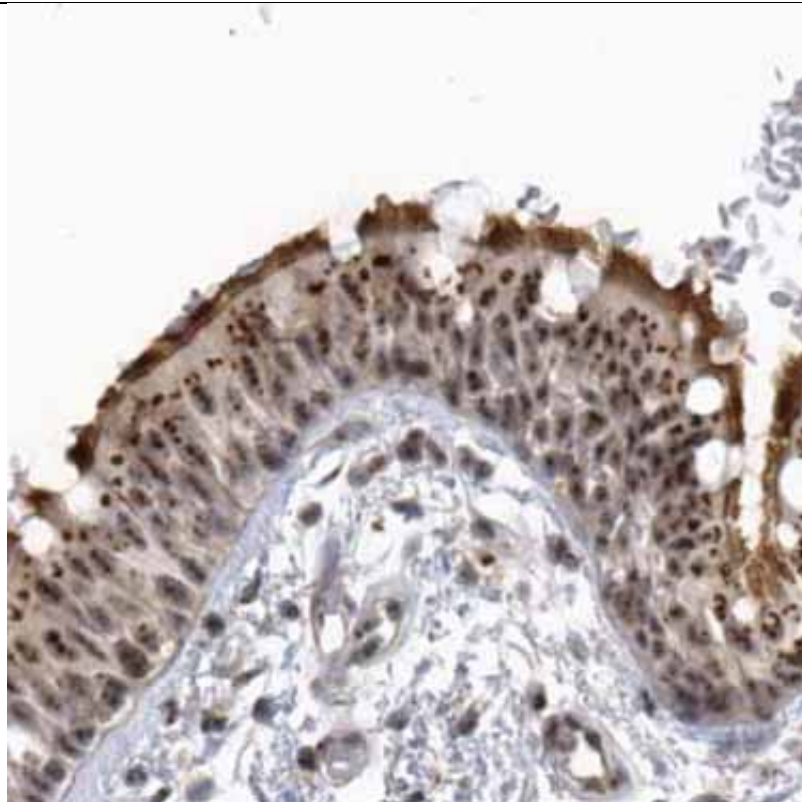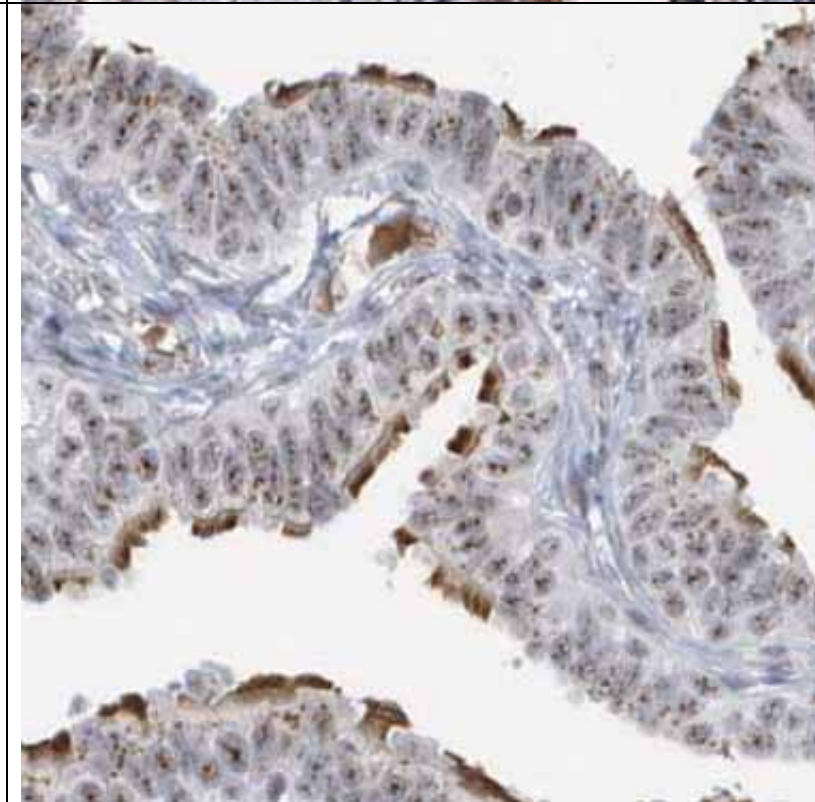

Staining is  
specific to  
*cilia*

TTC25  
(antibody  
HPA023908)

Category 1

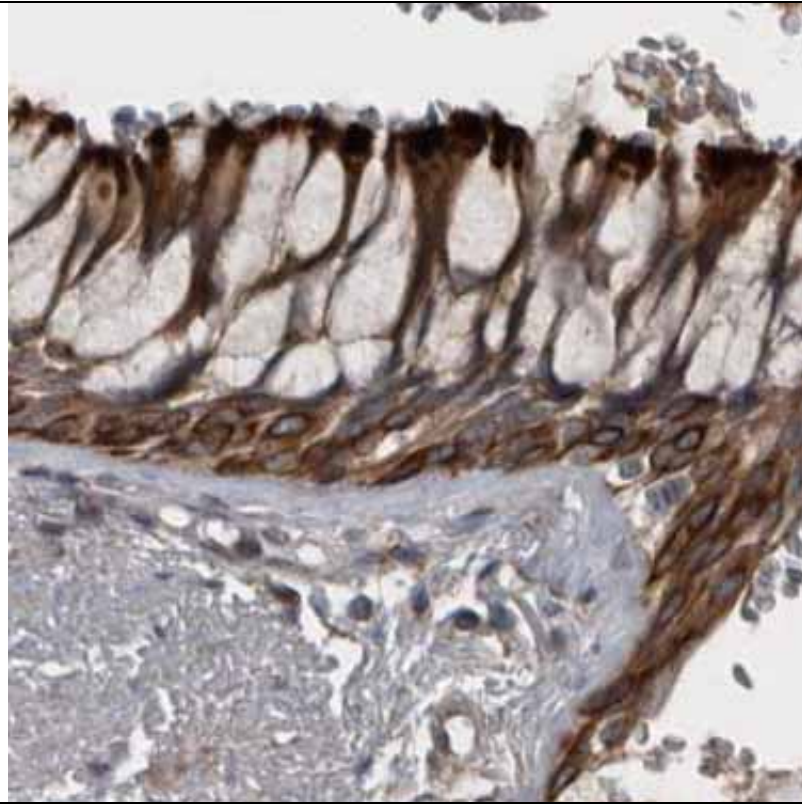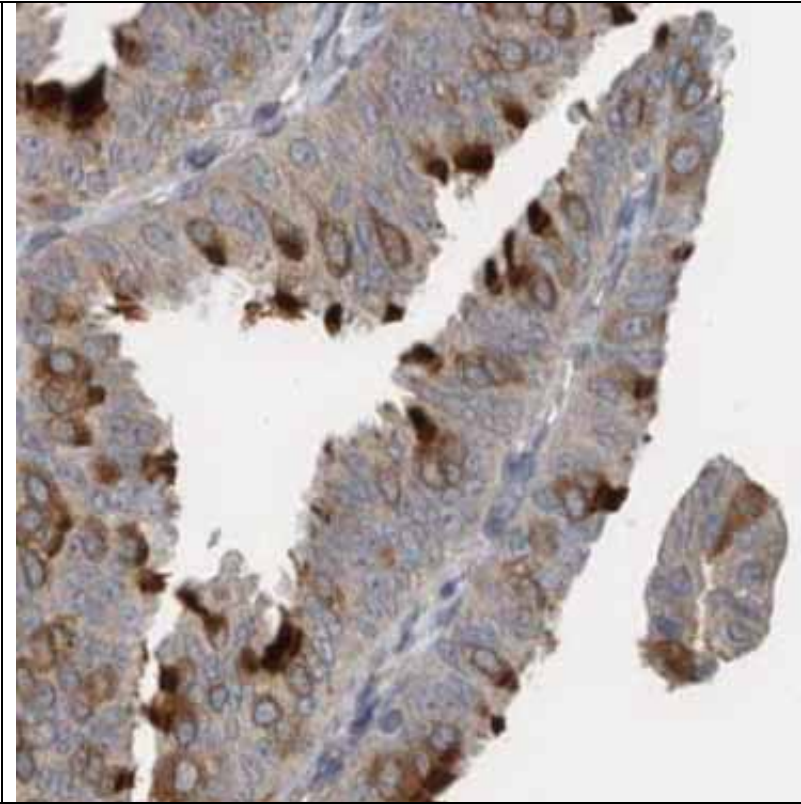

Staining is  
specific to  
*cilia*

TTC26  
(antibody  
HPA036338)

Category 1

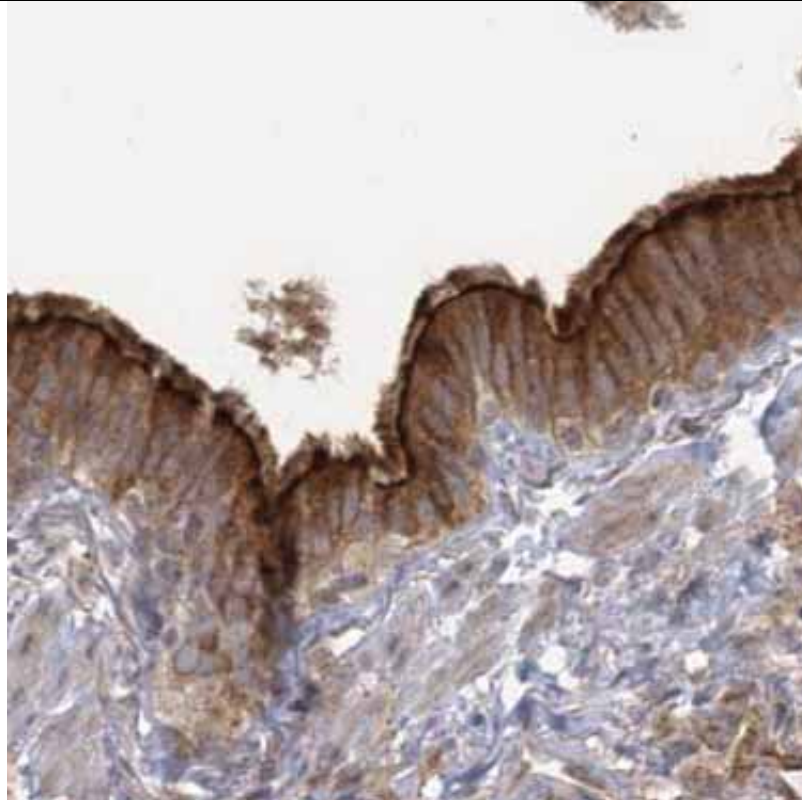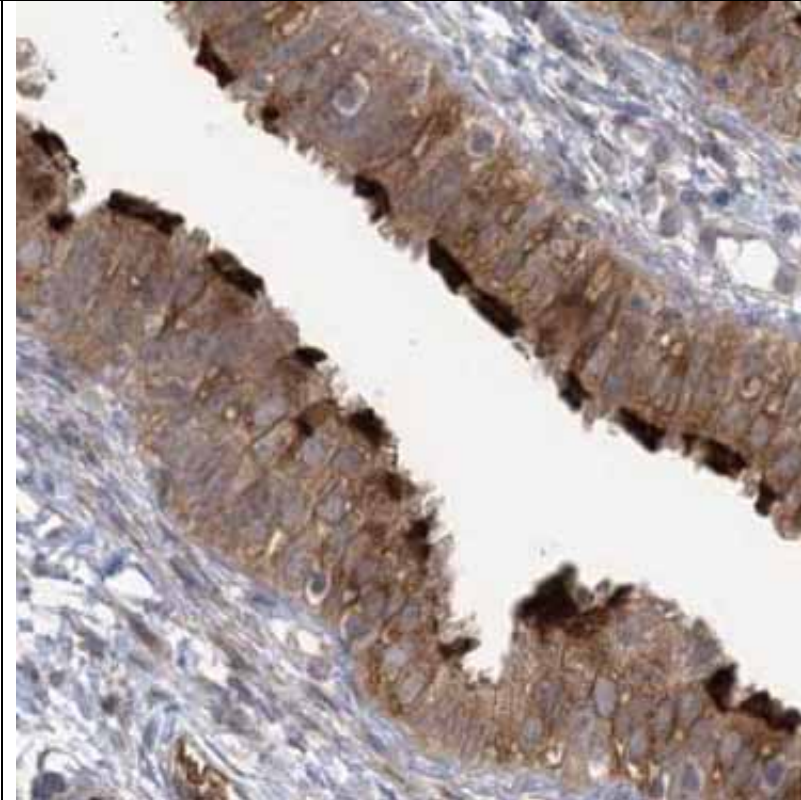

Staining is  
specific to  
*cilia*

TTC29  
(antibody  
HPA037006)

Category 1

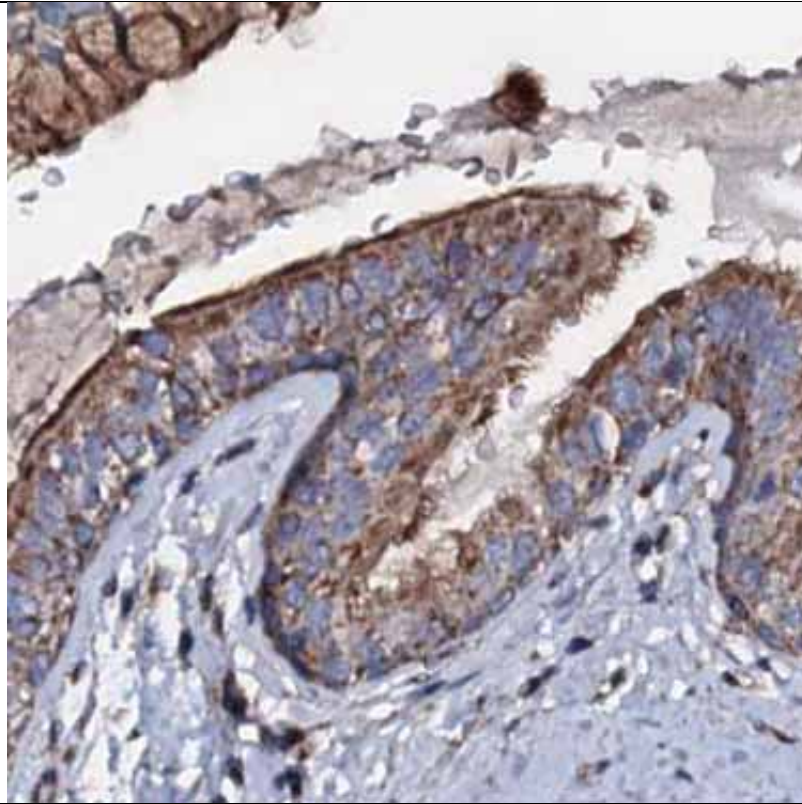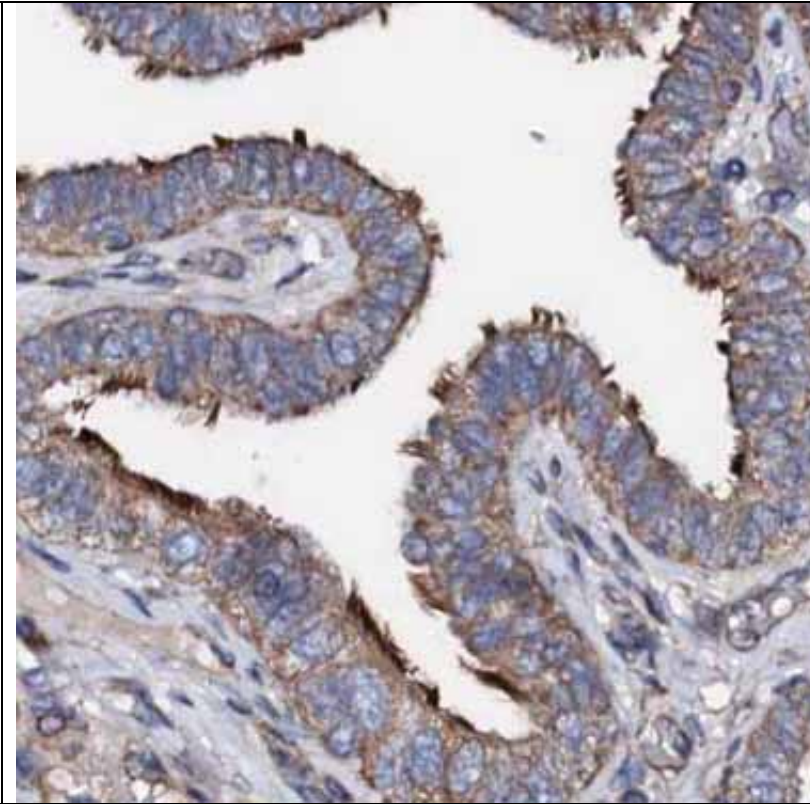

Staining is  
specific to  
*cilia*

WDR16  
(antibody  
HPA023247)

Category 1

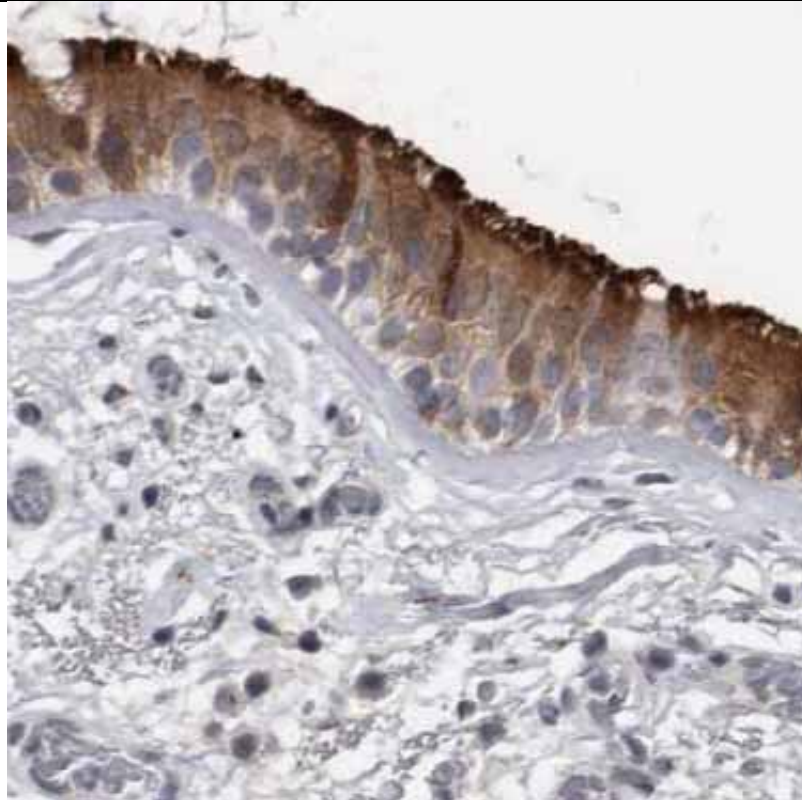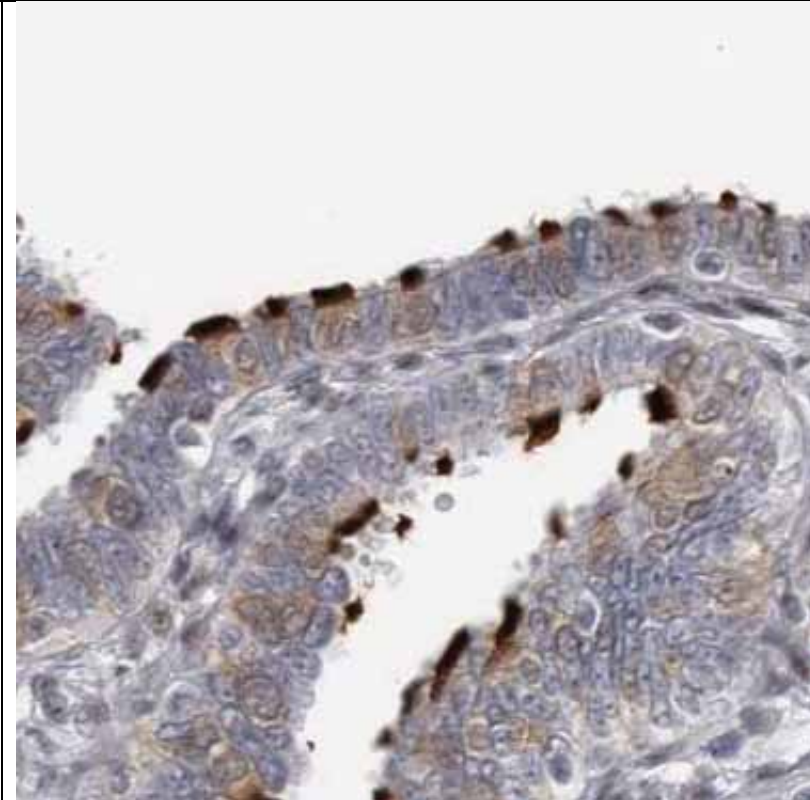

Staining is  
specific to  
*cilia*

YSK4  
(antibody  
HPA011388)

Category 1

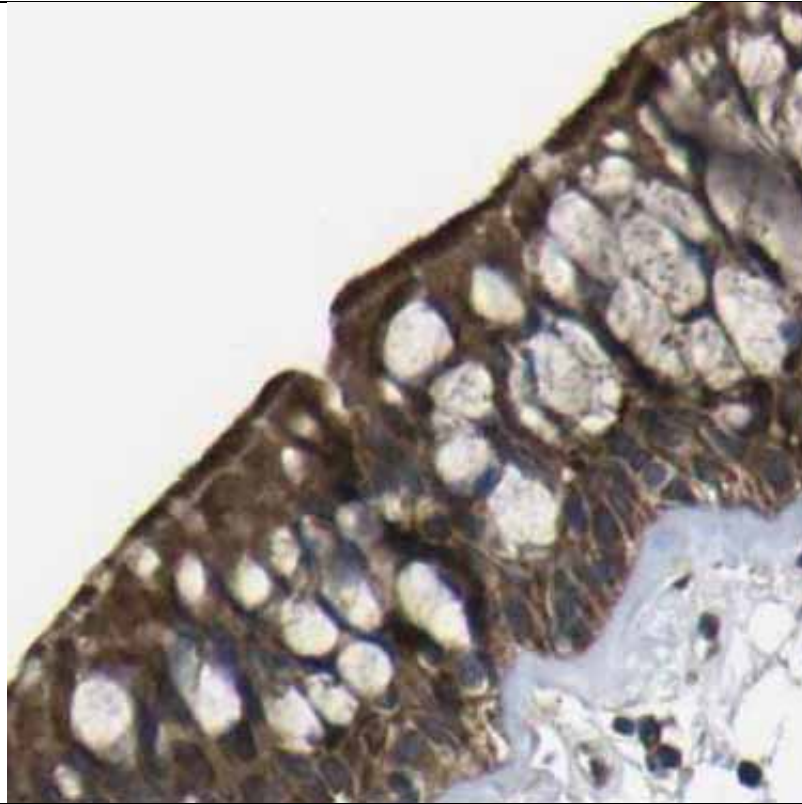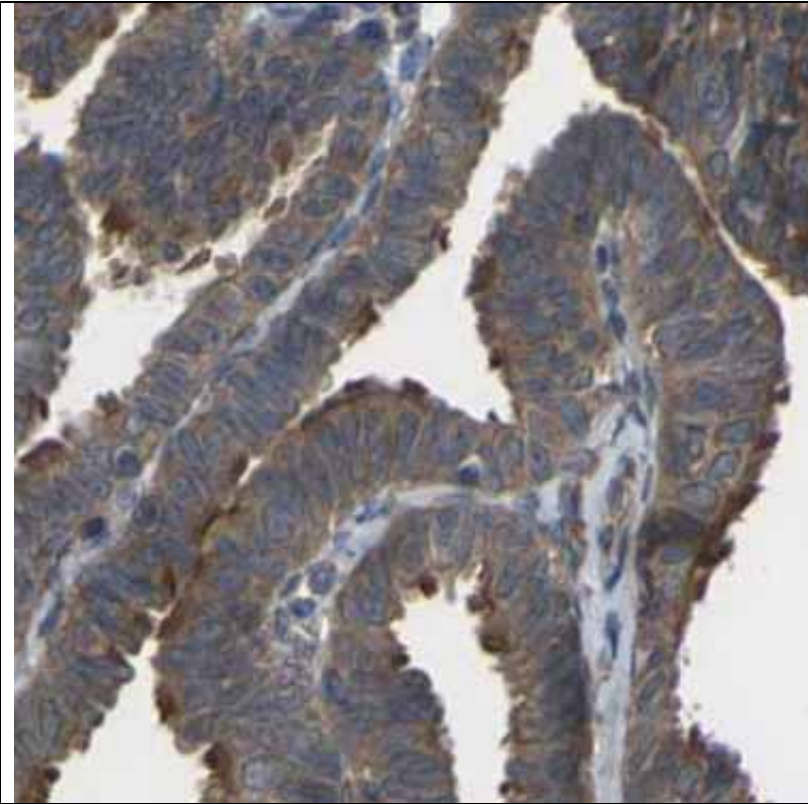

Staining is  
specific to  
*cilia*

ZBBX  
(antibody  
HPA036327)

Category 1

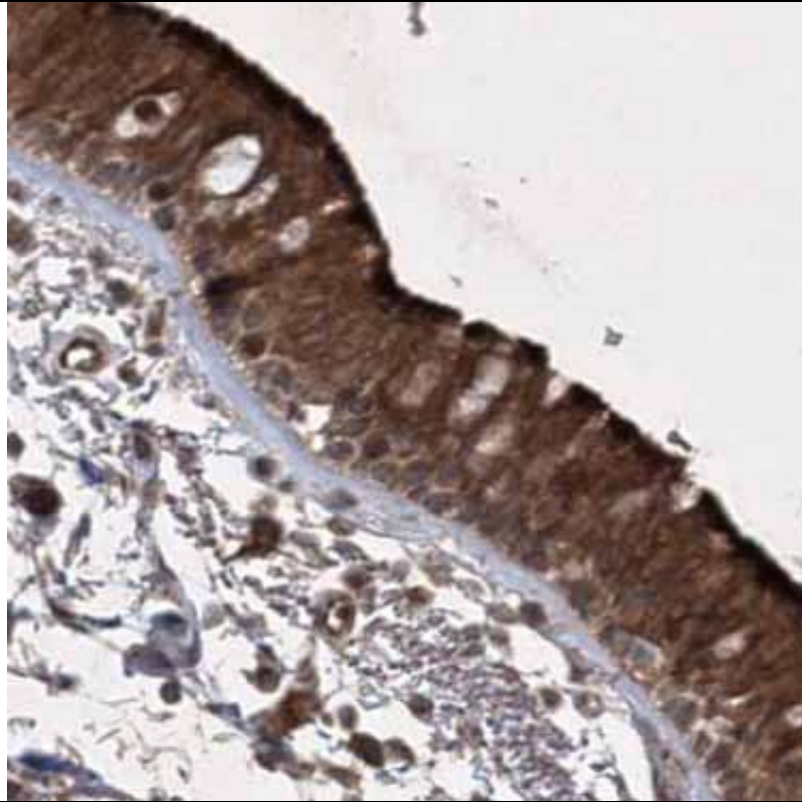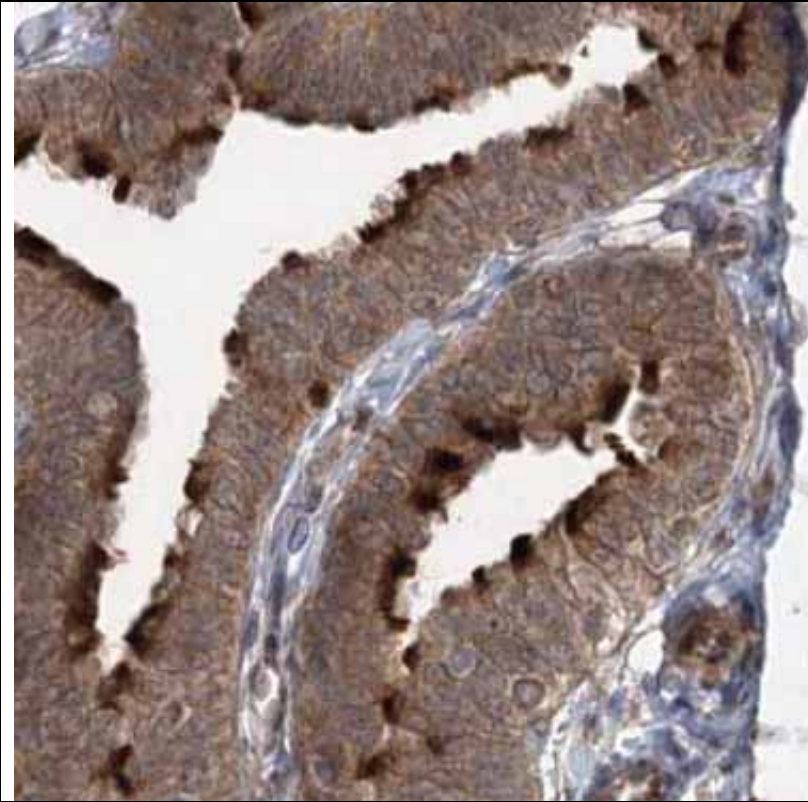

Staining is  
specific to  
*cilia*

AK1  
(antibody  
HPA006456)  
Category 1

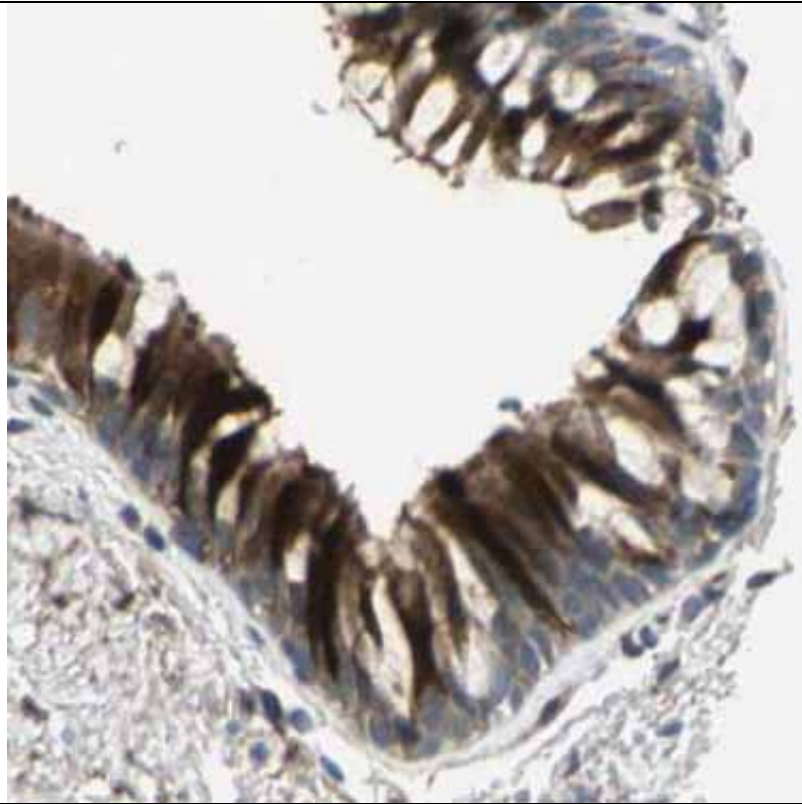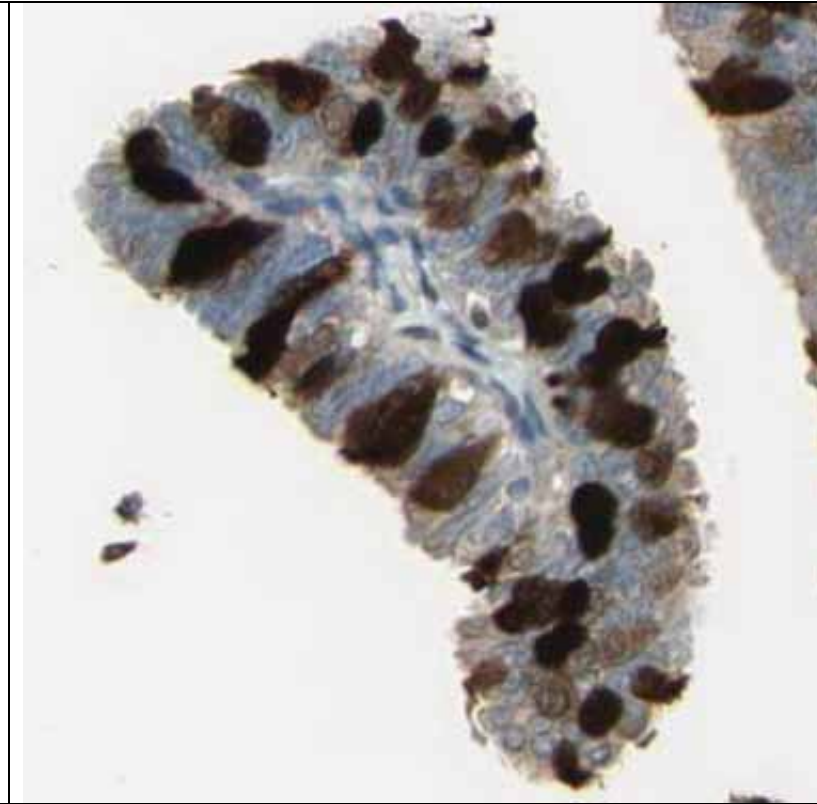

Staining is specific to *ciliated cells* (cilia and cytoplasm)

B9D1  
(antibody  
HPA022957)  
Category 1

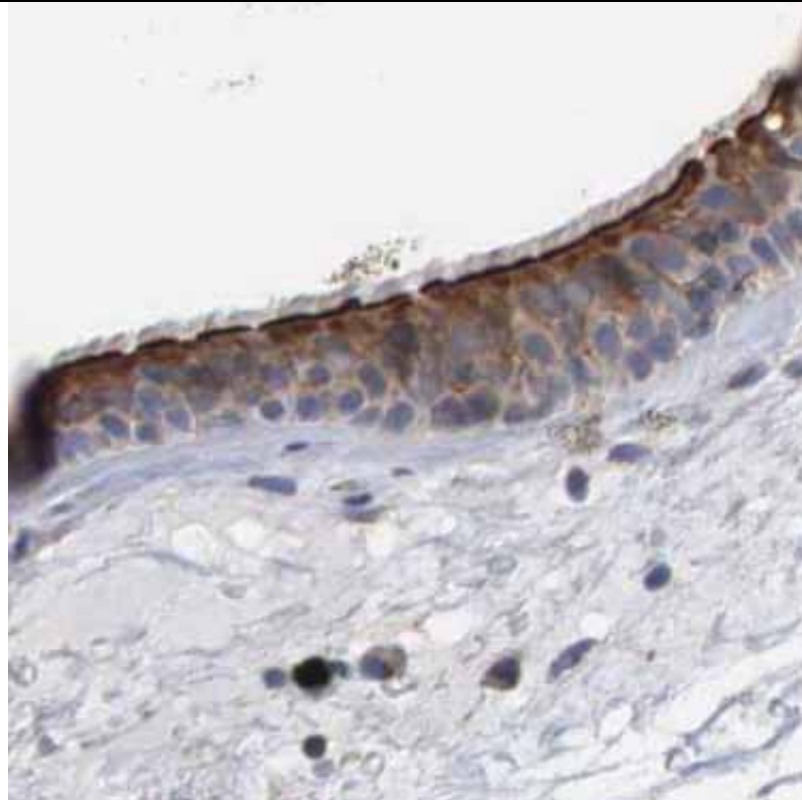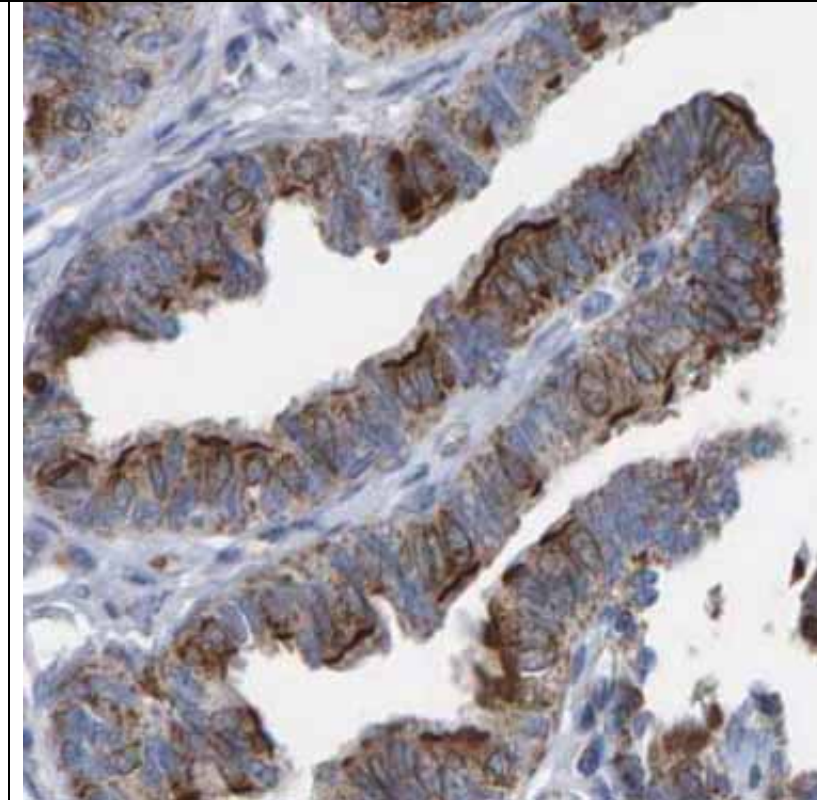

Staining is specific to *ciliated cells* (apical region of cytoplasm)

C1orf102  
(antibody  
HPA028436)

Category 1

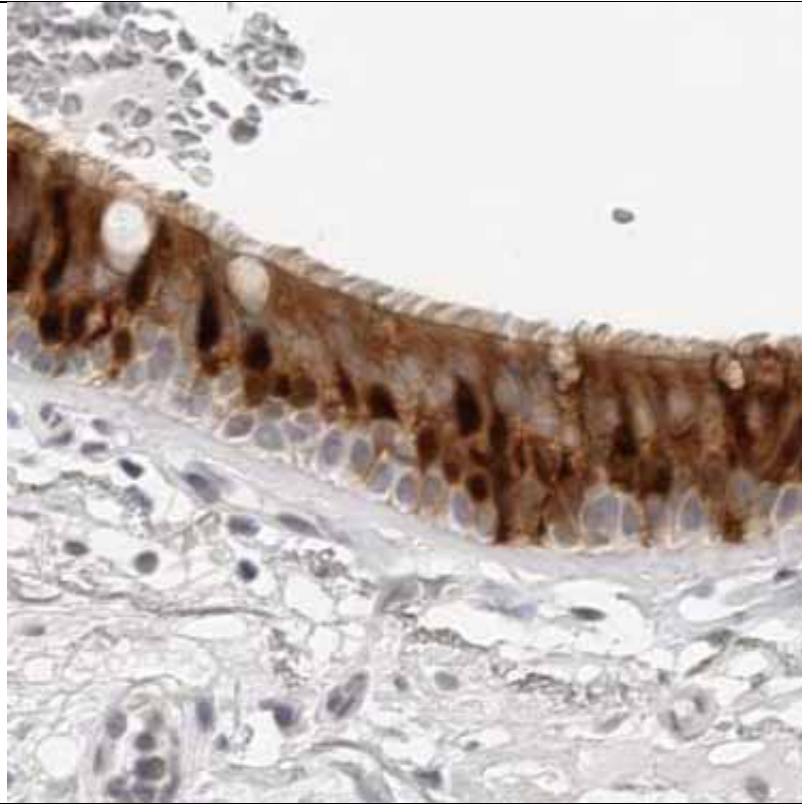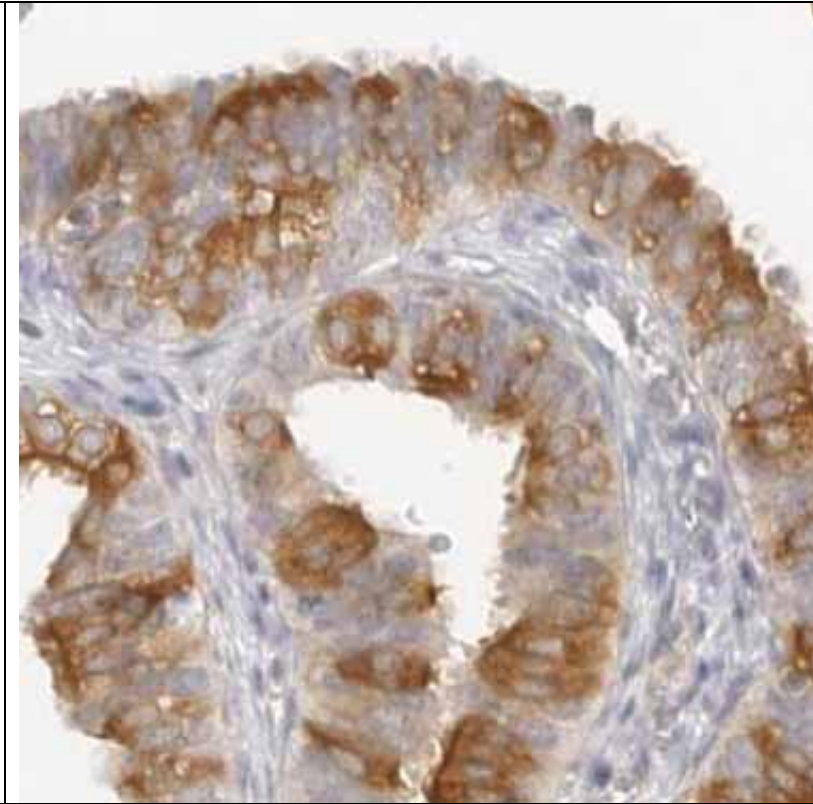

Staining is  
specific to  
*ciliated*  
*cells*  
(cytoplasm)

C11orf60  
(antibody  
HPA037909)

Category 1

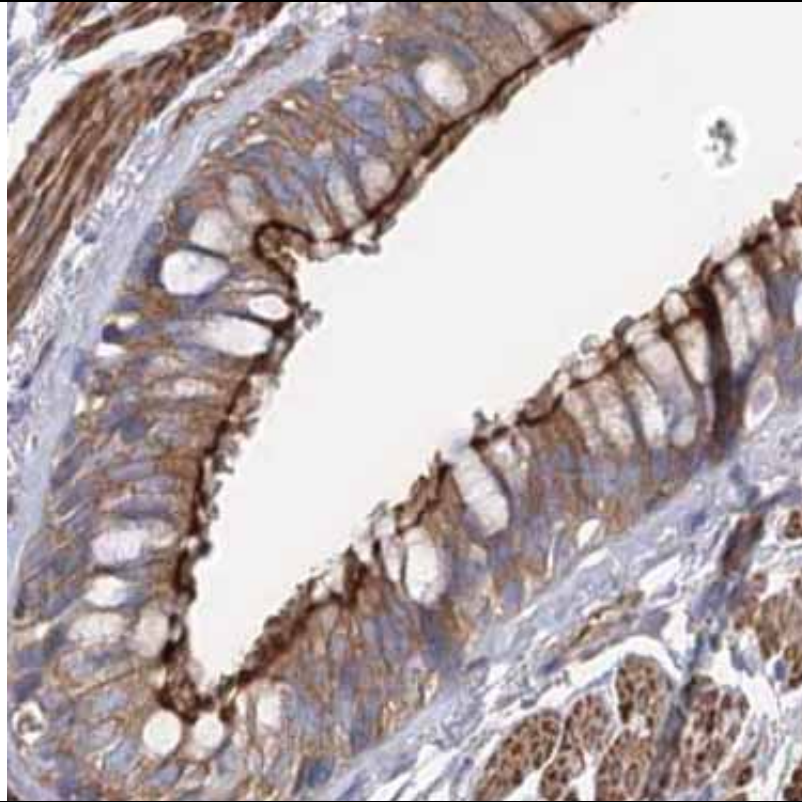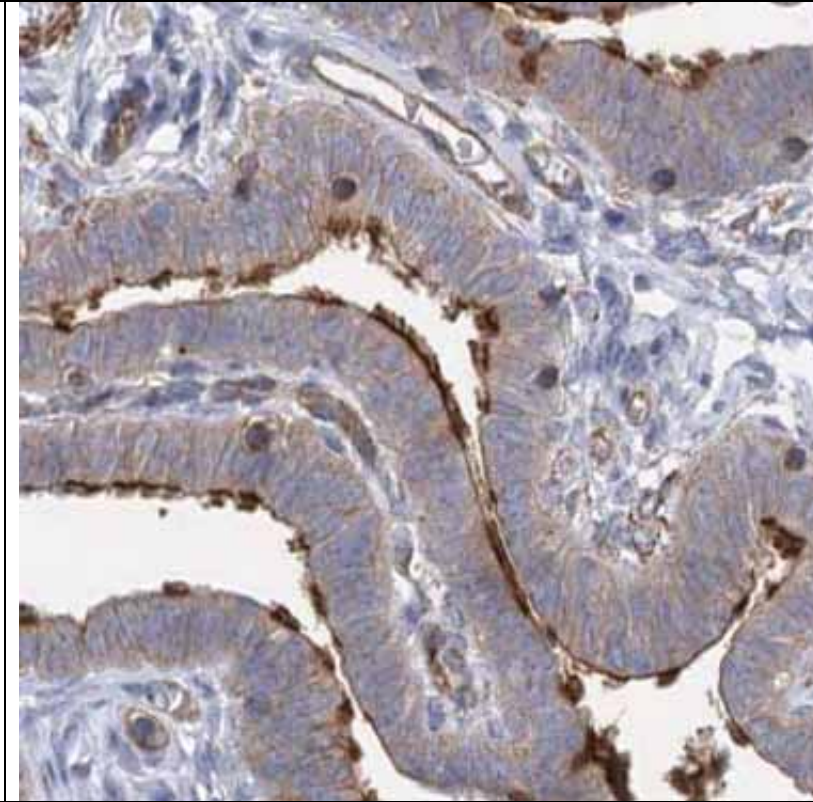

Staining is  
specific to  
*ciliated*  
*cells* (apical  
region of  
cytoplasm)

C13orf30  
(antibody  
HPA040118)

Category 1

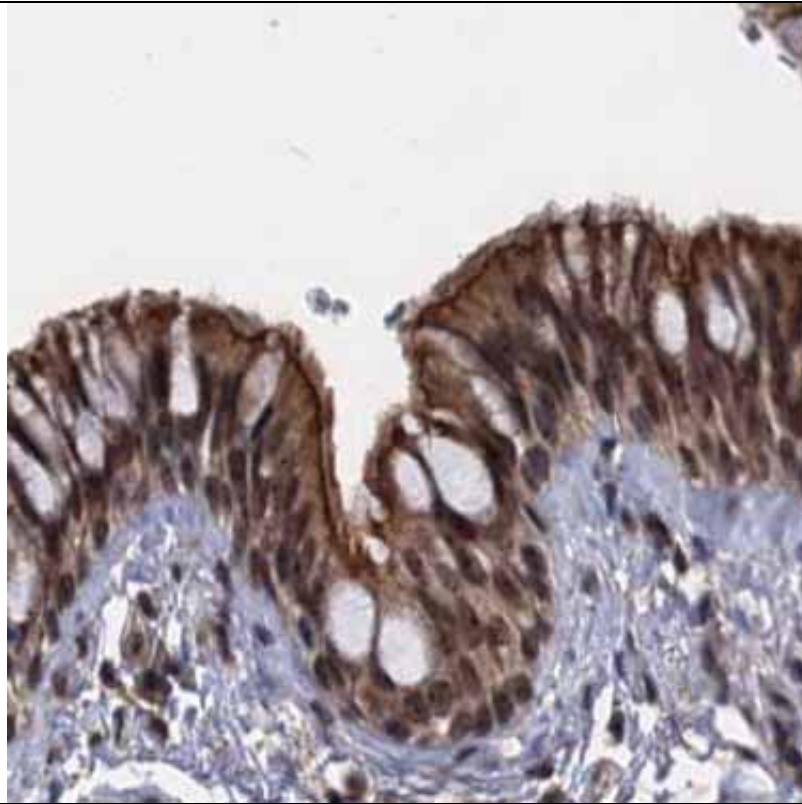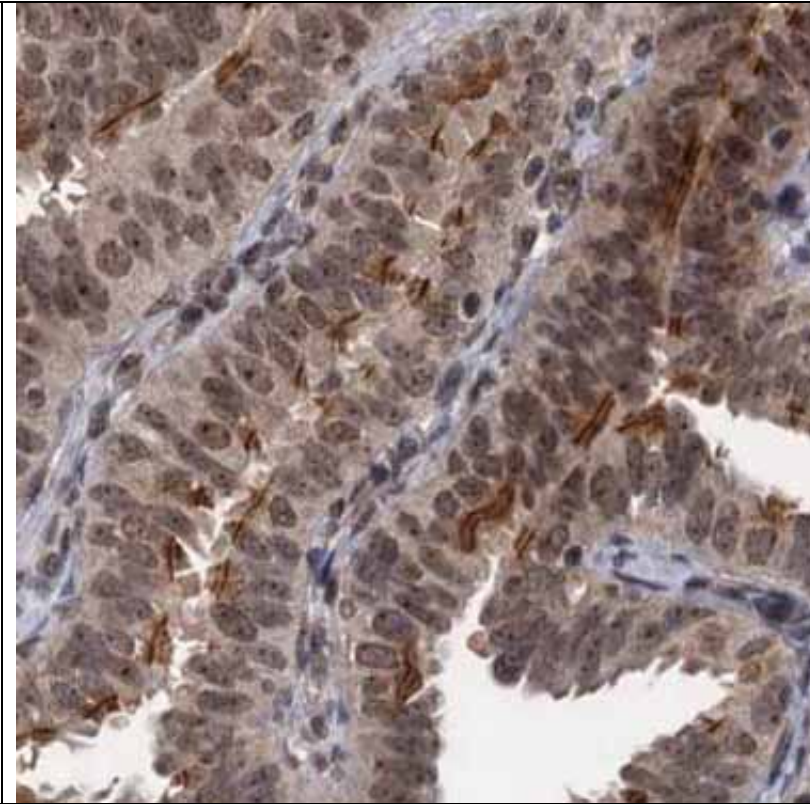

Staining is  
specific to  
*ciliated*  
*cells* (apical  
region of  
cytoplasm)

C6orf118  
(antibody  
HPA029787)

Category 1

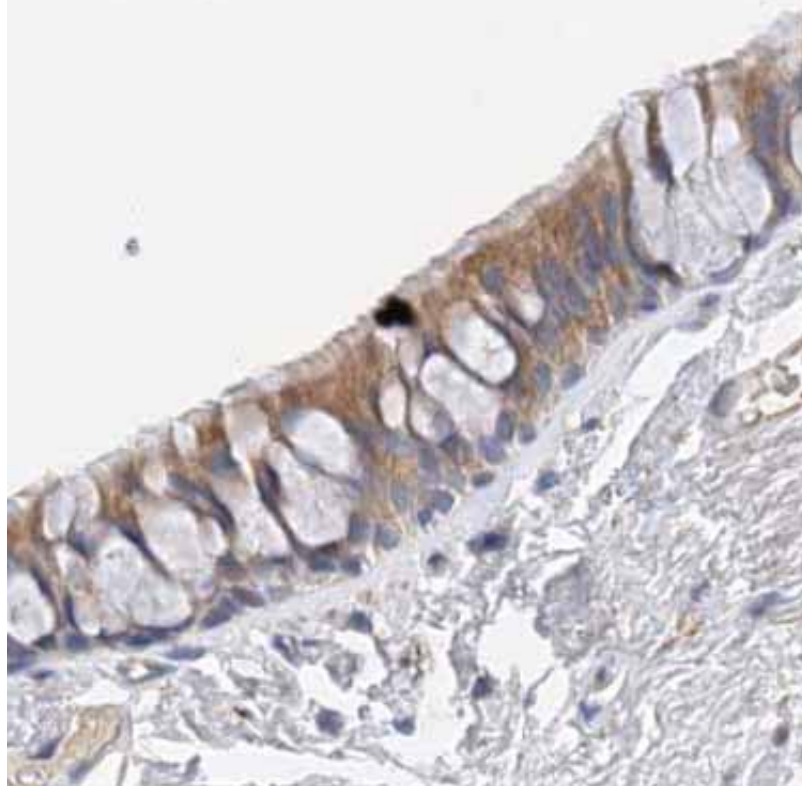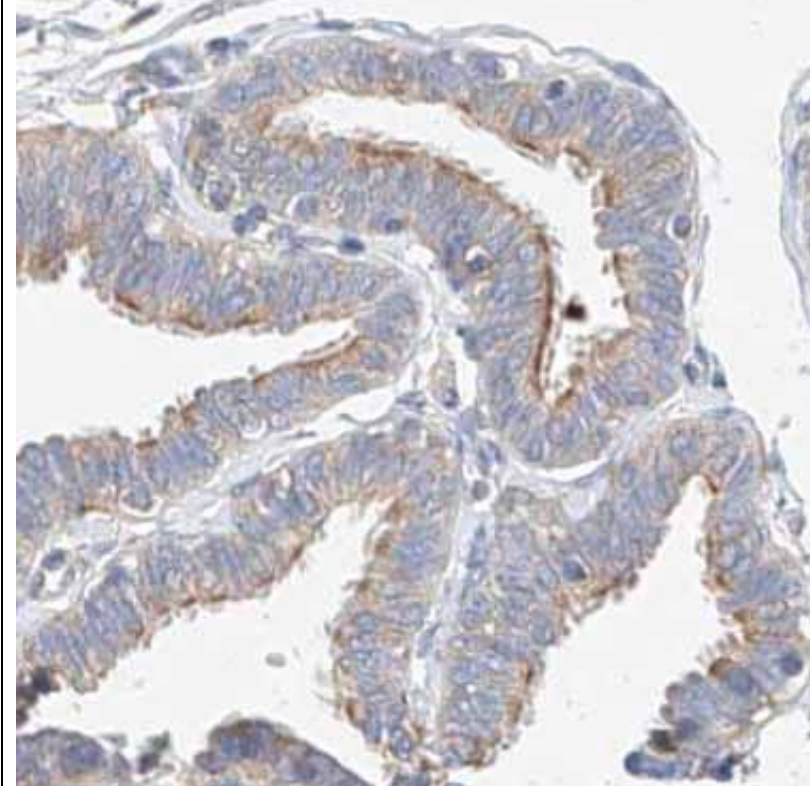

Staining is  
specific to  
*ciliated*  
*cells*  
(uncertain  
subcellular  
localization)

C9orf135  
(antibody  
HPA021325)

Category 1

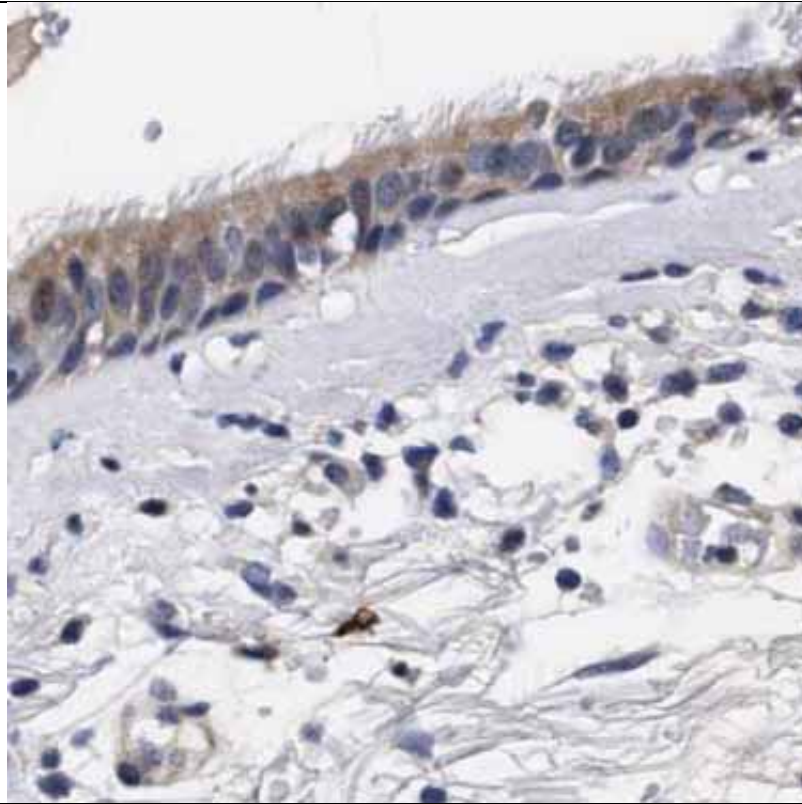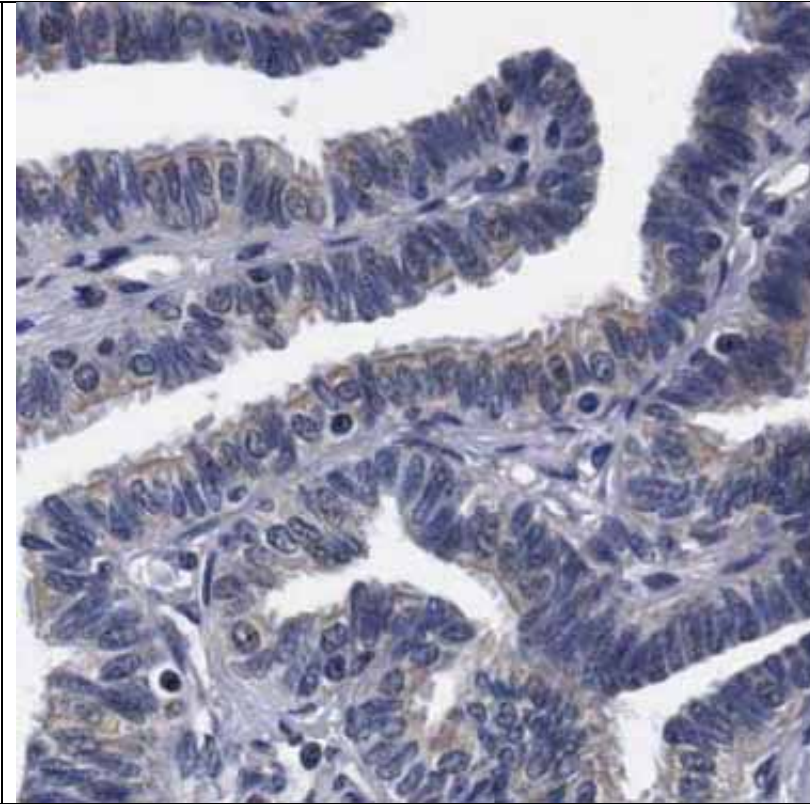

Staining is  
specific to  
*ciliated*  
*cells*  
(uncertain  
subcellular  
localization)

C2CD3  
(antibody  
HPA038552)

Category 1

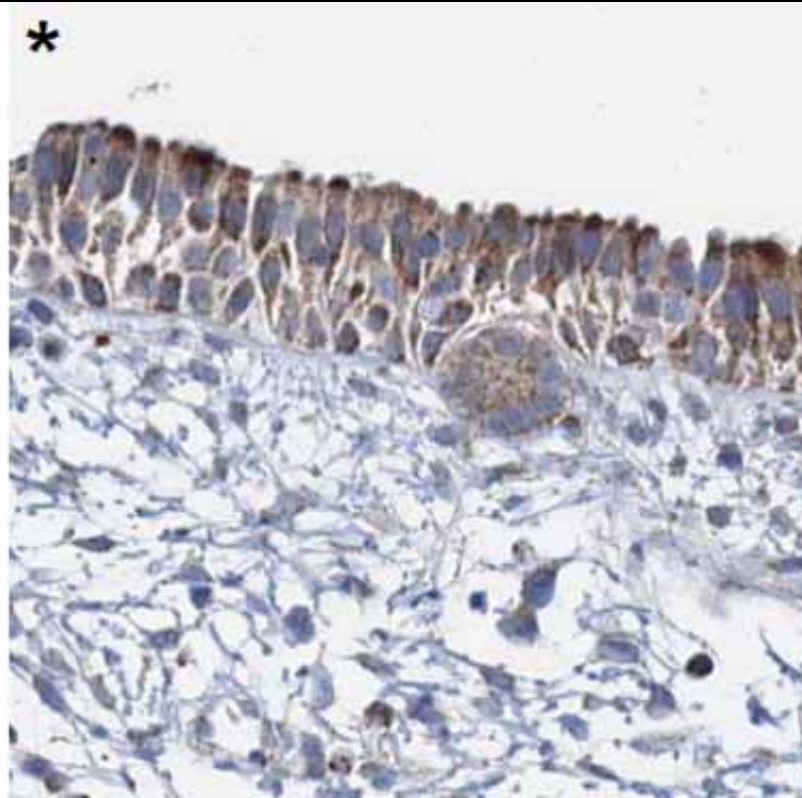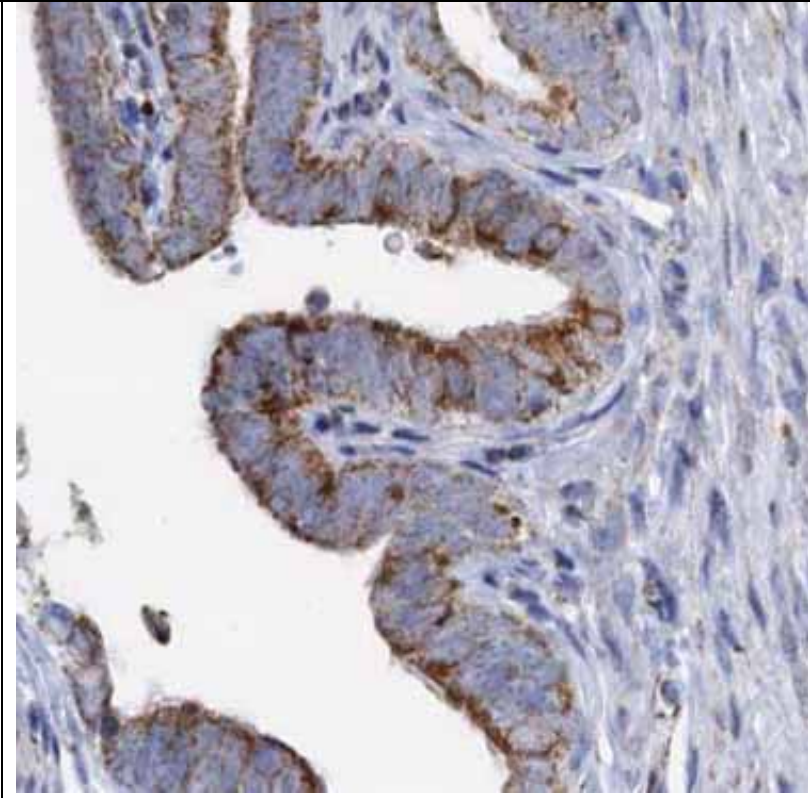

Staining is  
specific to  
*ciliated*  
*cells* (apical  
cytoplasm)



CCDC41  
(antibody  
HPA038161)

Category 1

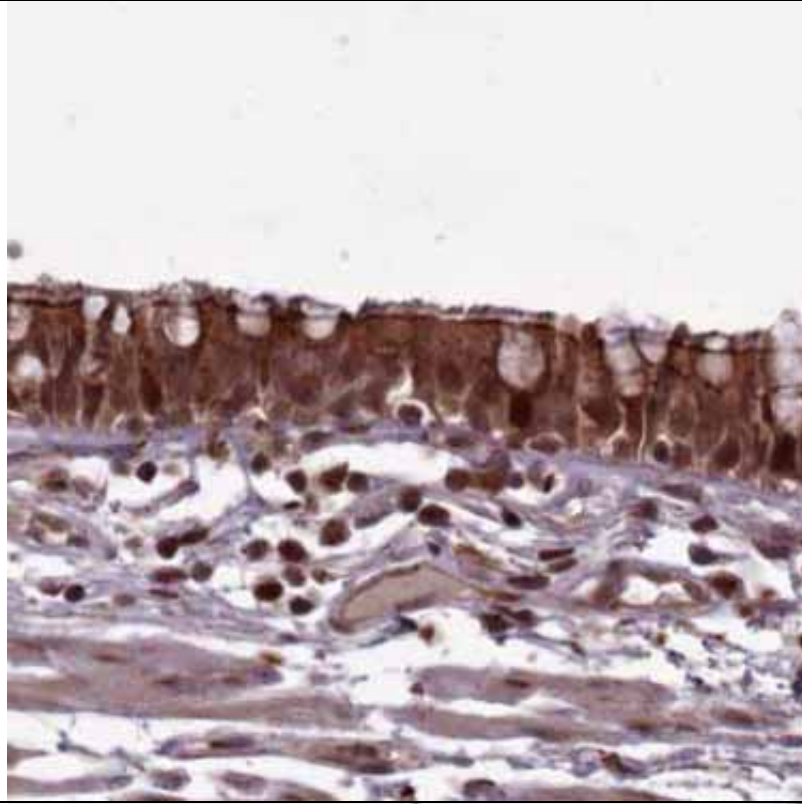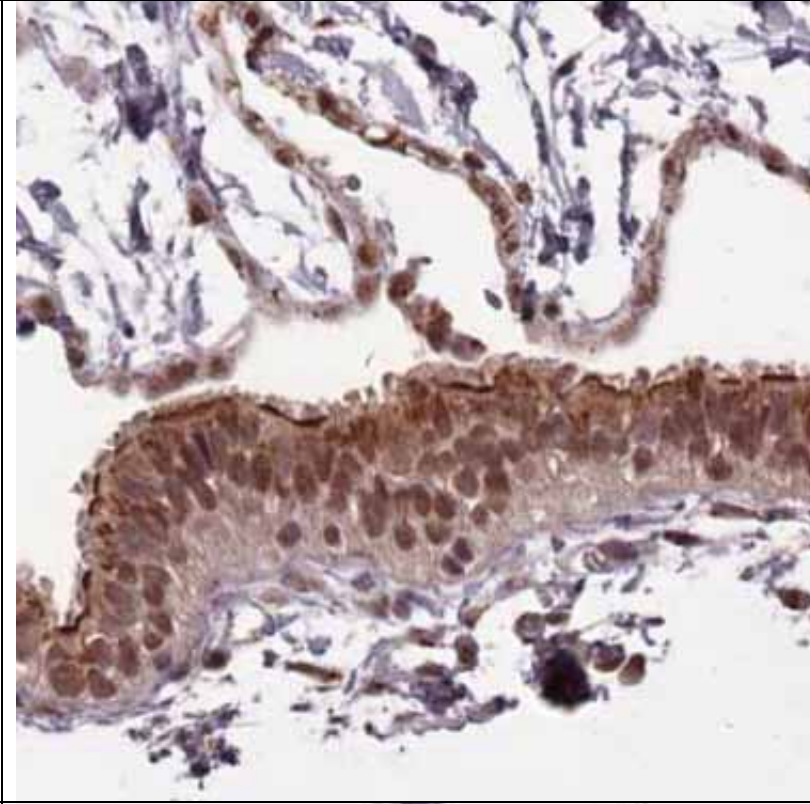

Staining is  
specific to  
*ciliated*  
*cells* (apical  
region of  
cytoplasm)

CDS1  
(antibody  
HPA036187)

Category 1

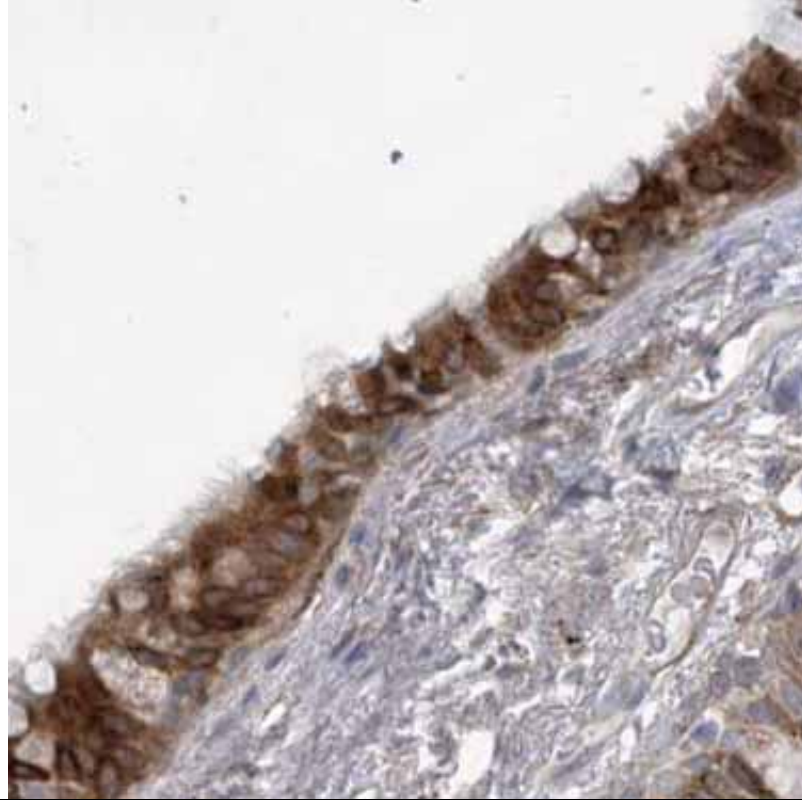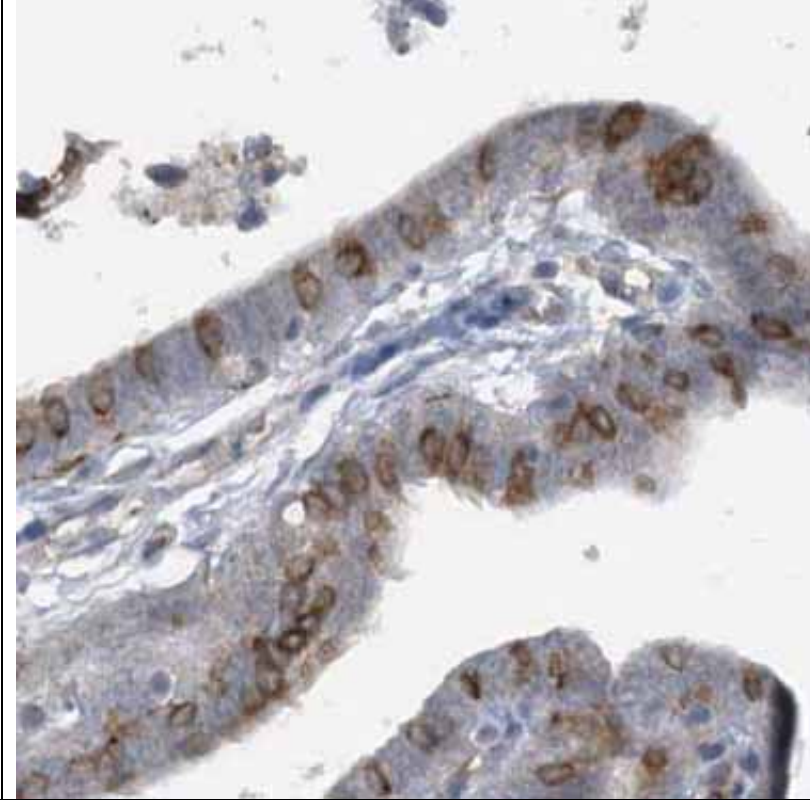

Staining is  
specific to  
*ciliated*  
*cells*  
(cytoplasm)

CEP97  
(antibody  
HPA002980)

Category 1

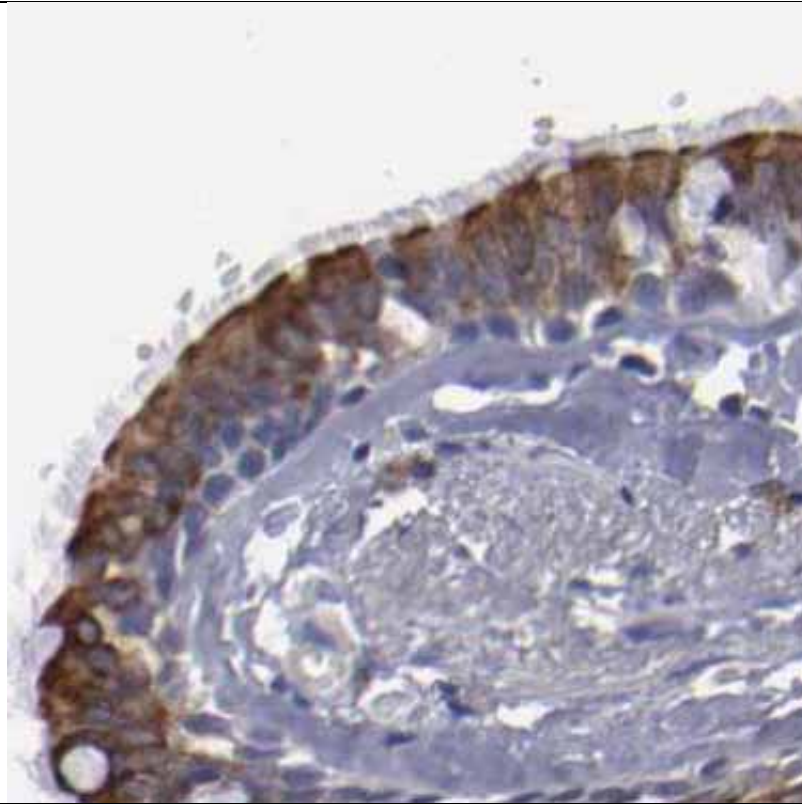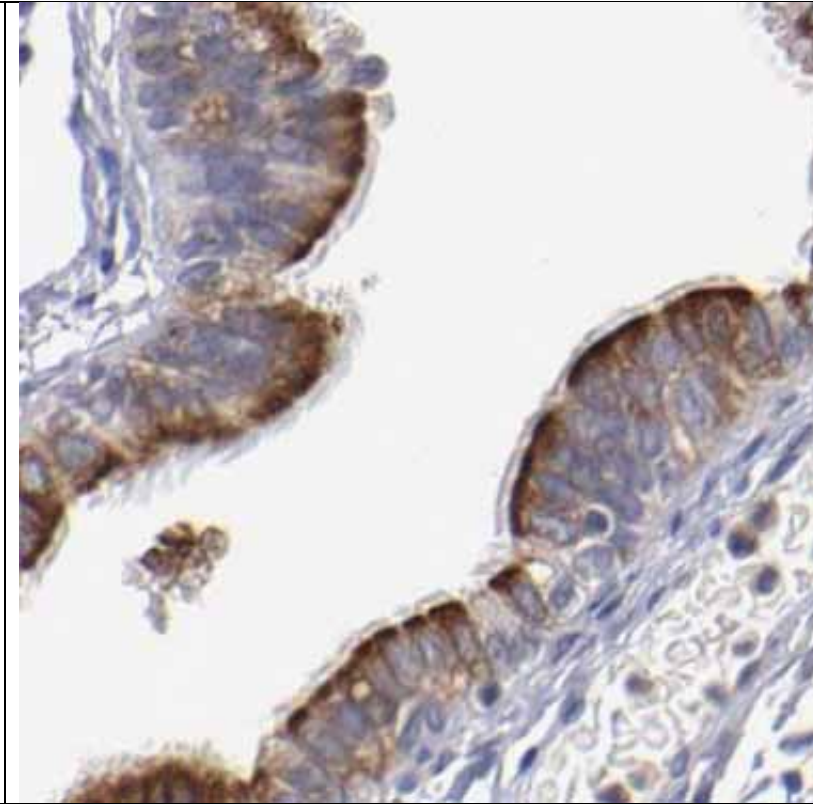

Staining is  
specific to  
*ciliated*  
*cells* (apical  
region of  
cytoplasm)

CLGN  
(antibody  
CAB020709)

Category 1

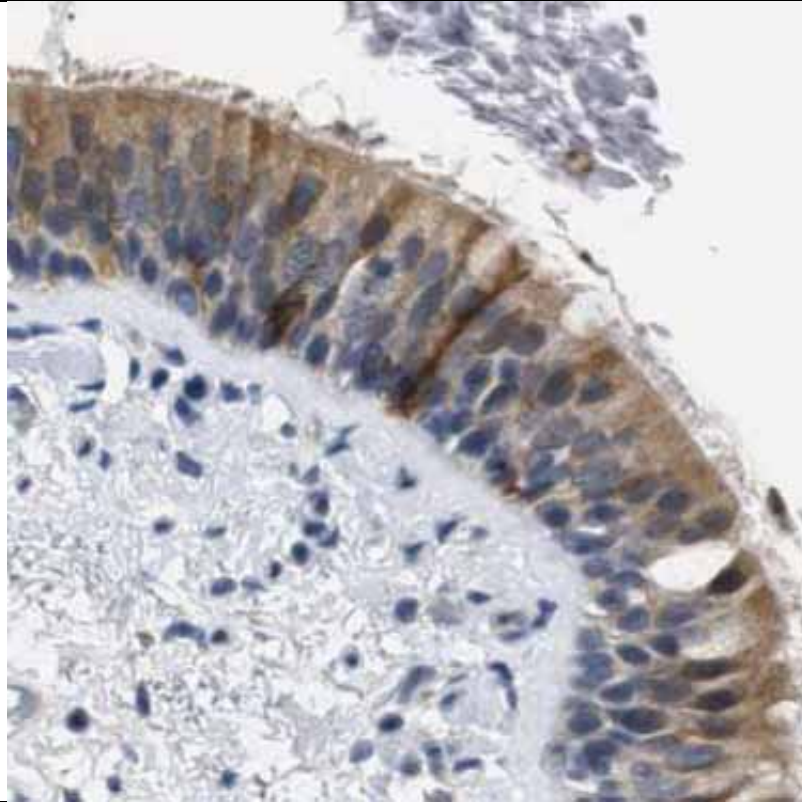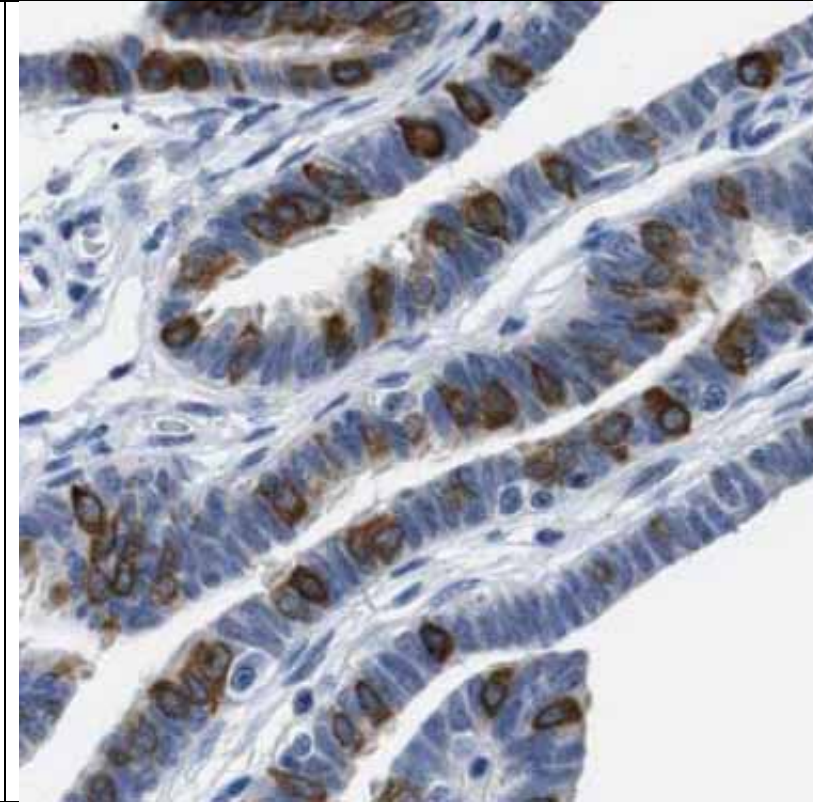

Staining is  
specific to  
*ciliated*  
*cells*  
(cytoplasm)

CLUAP1  
(antibody  
HPA036976)

Category 1

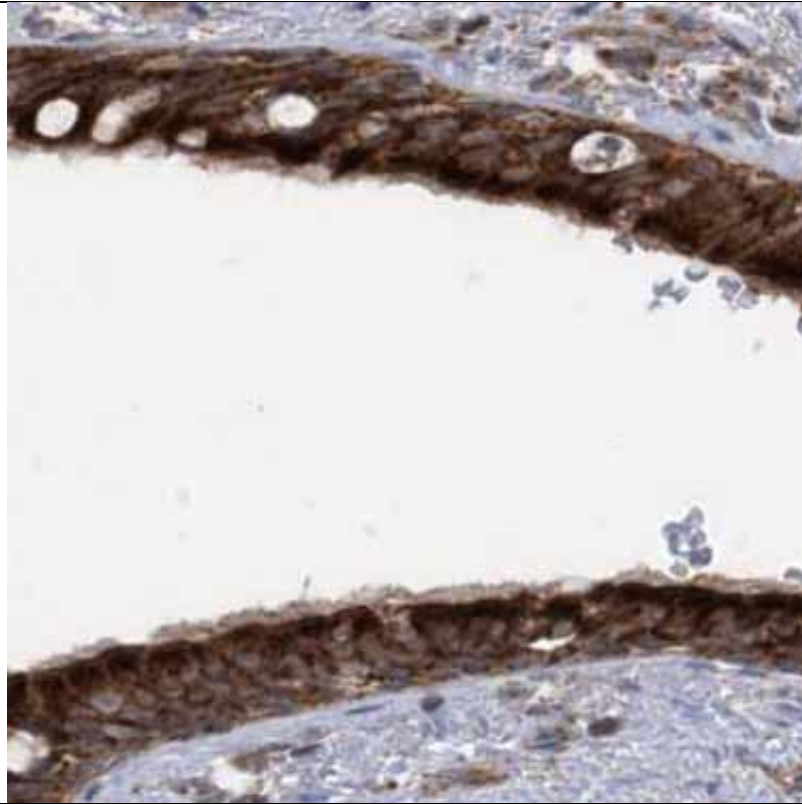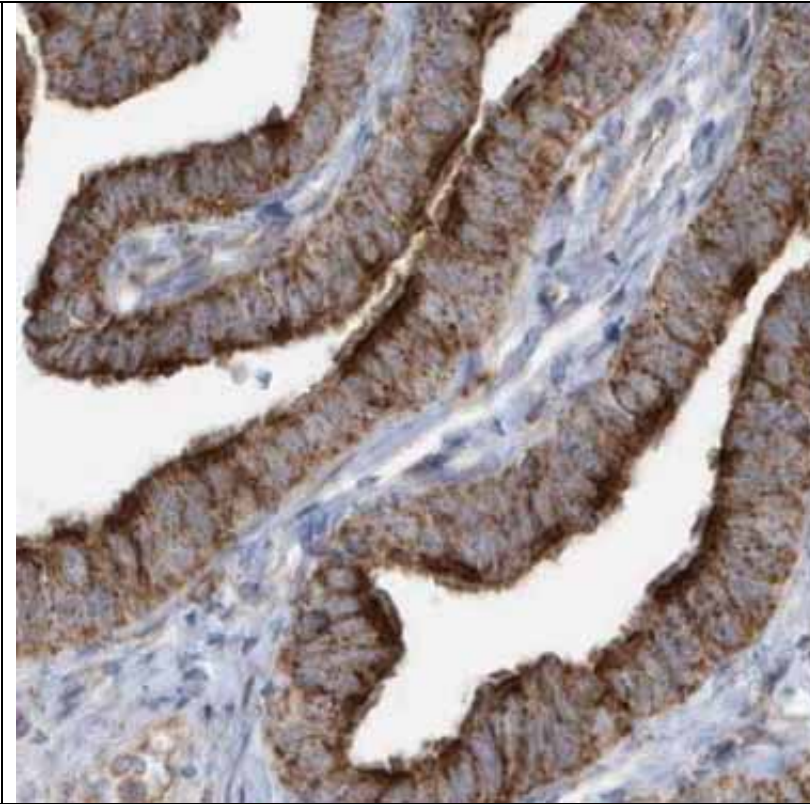

Staining is  
specific to  
*ciliated*  
*cells* (apical  
region of  
cytoplasm)

DPCD  
(antibody  
HPA036604)

Category 1

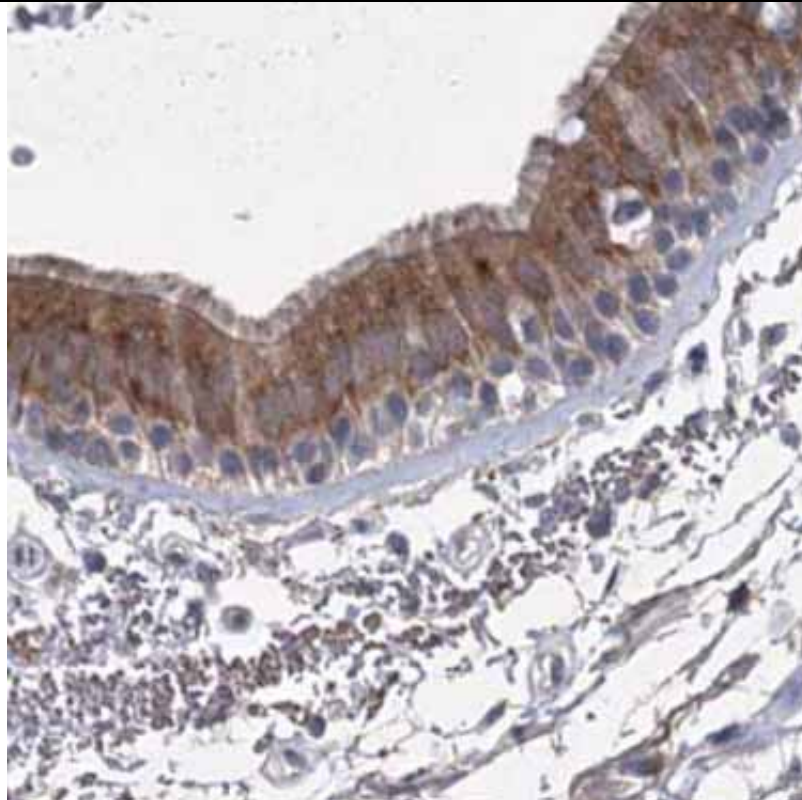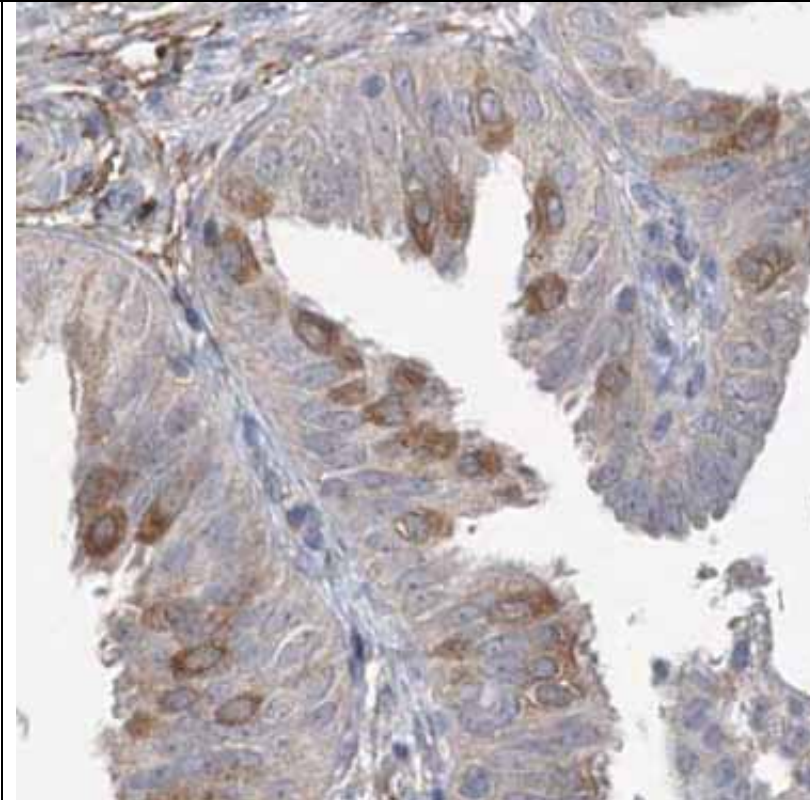

Staining is  
specific to  
*ciliated*  
*cells*  
(cytoplasm)

DZIP1L  
(antibody  
HPA030404)

Category 1

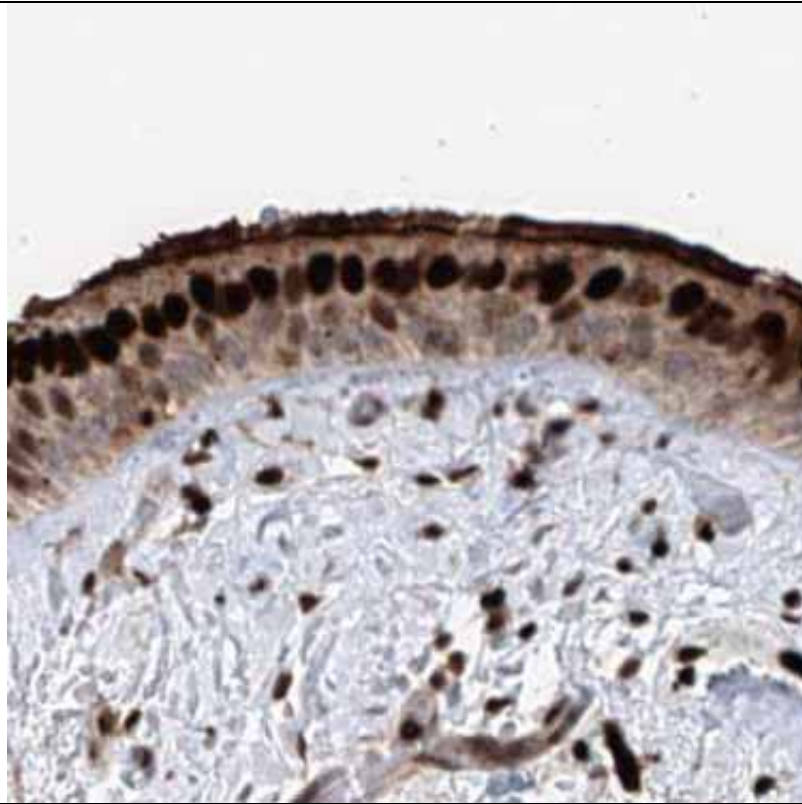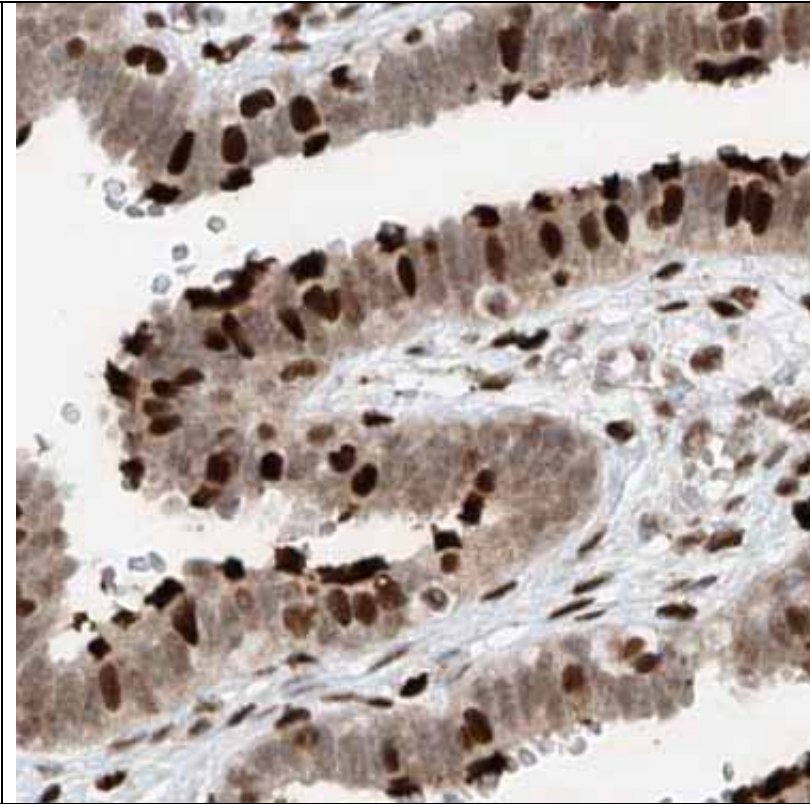

Staining is  
specific to  
*ciliated  
cells* (cilia  
and  
nucleus)

FOXJ1  
(antibody  
HPA005714)

Category 1

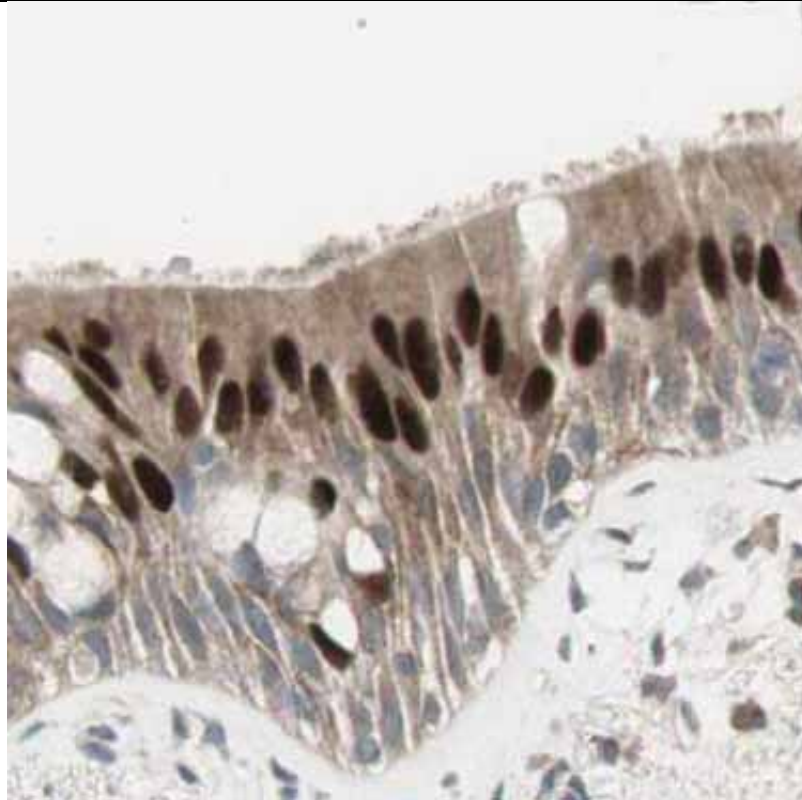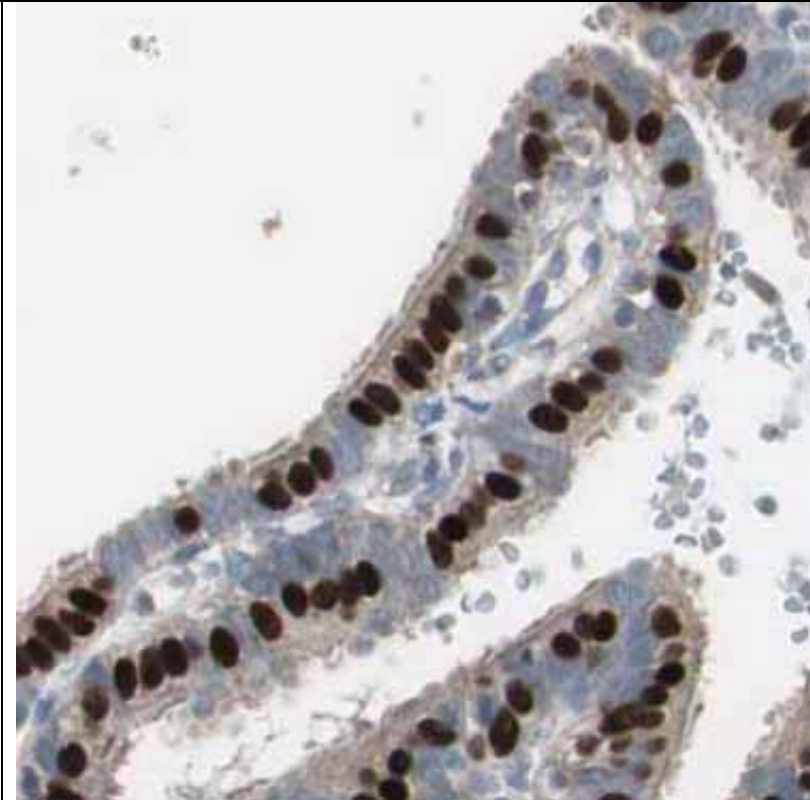

Staining is  
specific to  
*ciliated  
cells*  
(nucleus)

HSP90AA1  
(antibody  
CAB002058)

Category 1

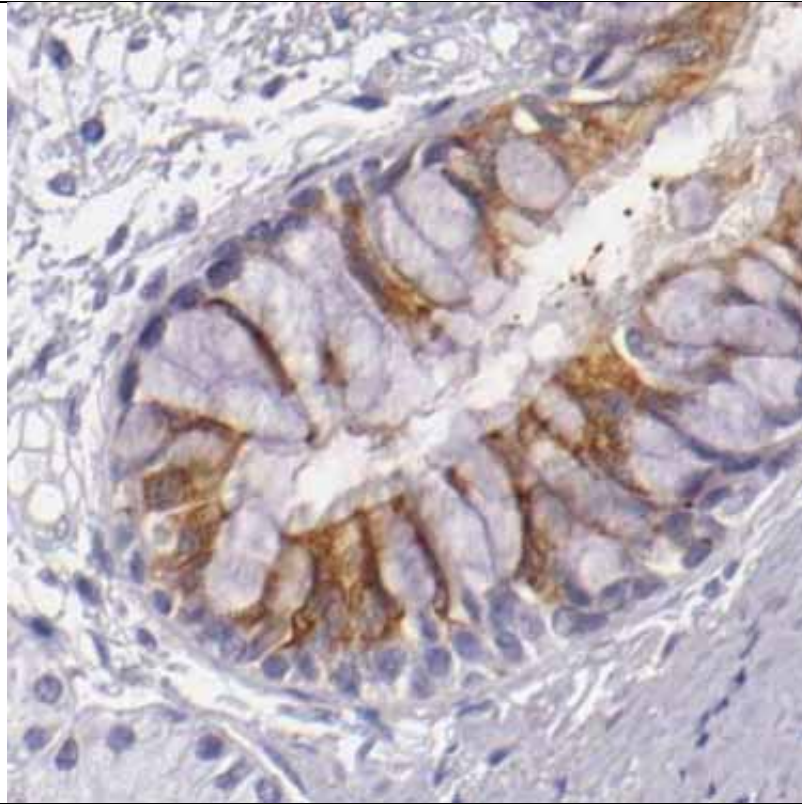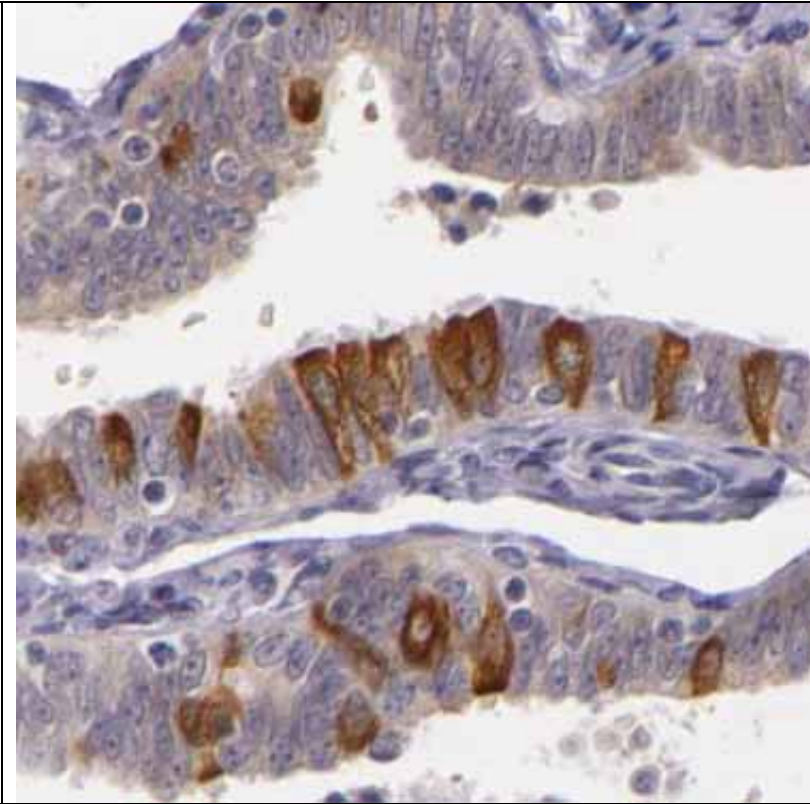

Staining is  
specific to  
*ciliated*  
*cells*  
(cytoplasm)

HSPB11  
(antibody  
HPA030140)

Category 1

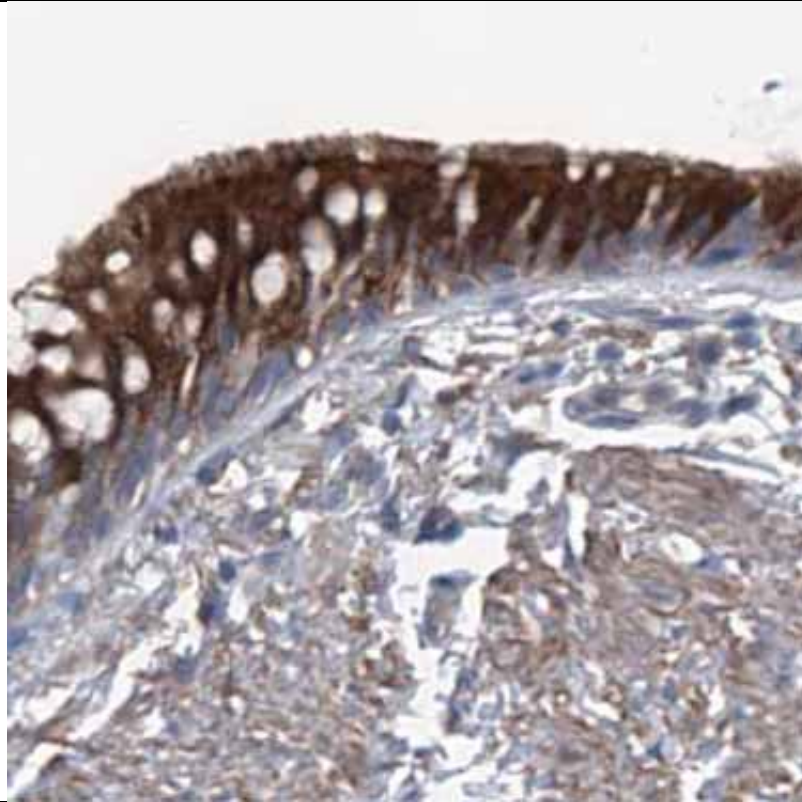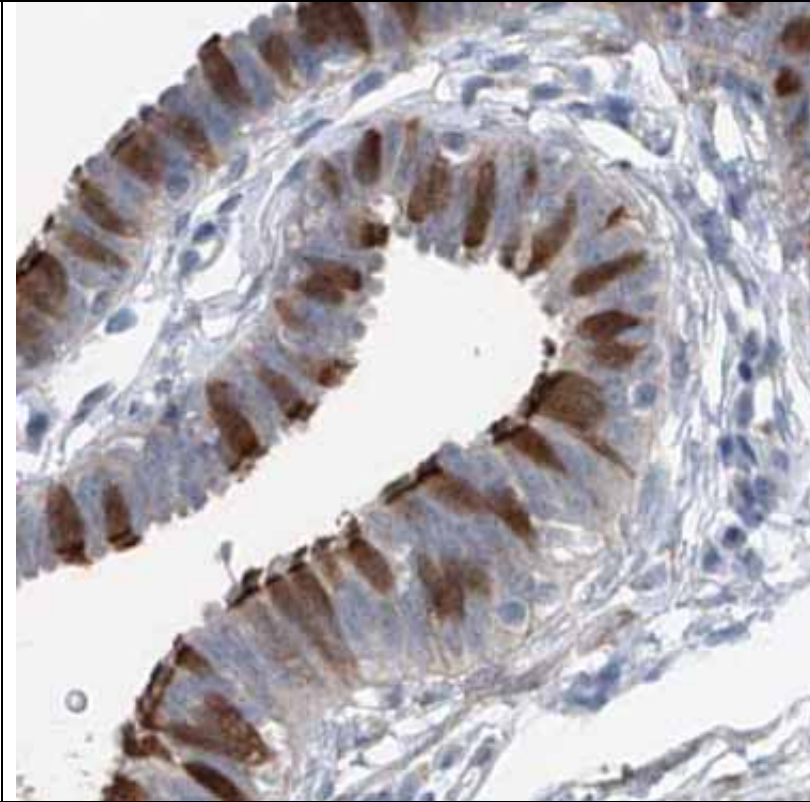

Staining is  
specific to  
*ciliated*  
*cells* (cilia  
and apical  
cytoplasm)

MAK  
(antibody  
HPA039092)

Category 1

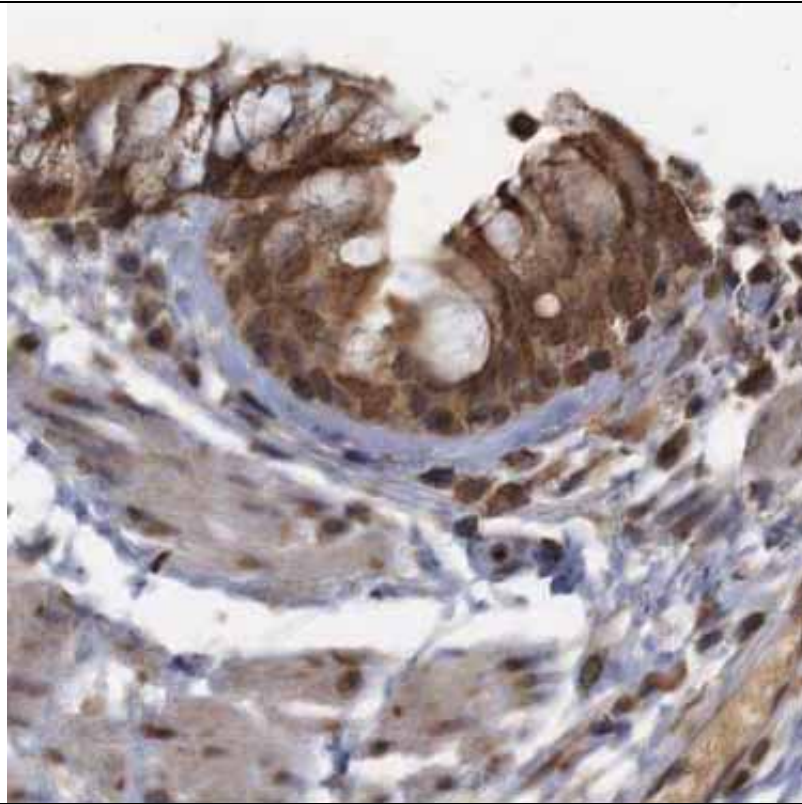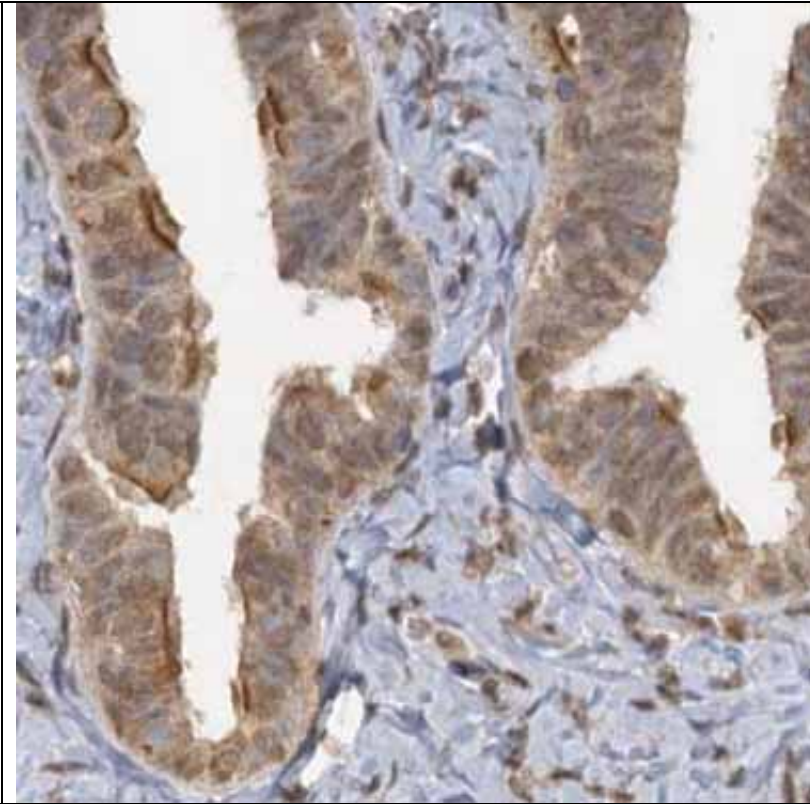

Staining is  
specific to  
*ciliated*  
*cells* (cilia  
and  
cytoplasm)

MAP9  
(antibody  
HPA037864)

Category 1

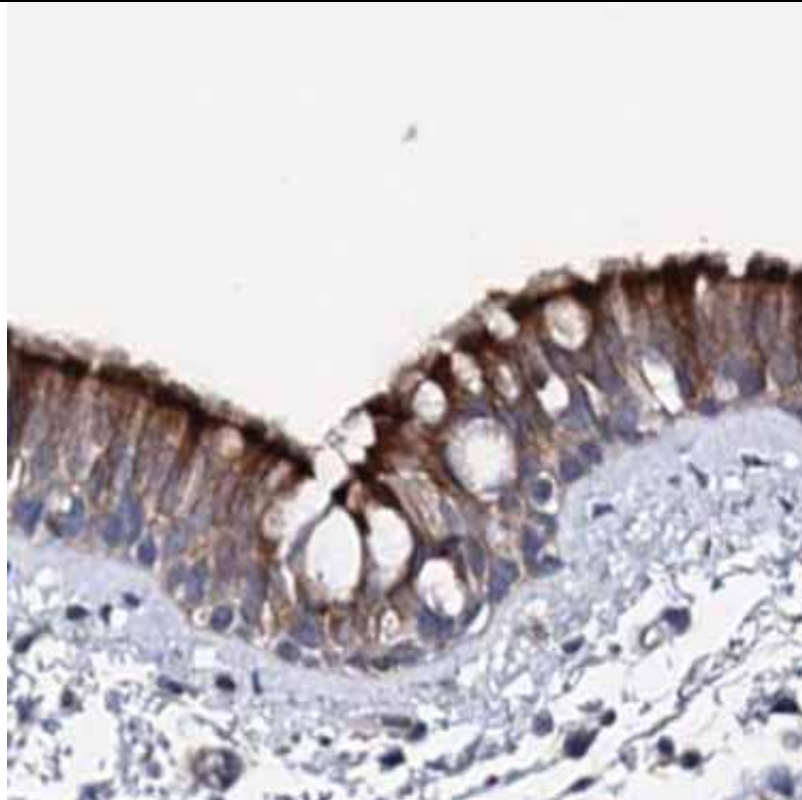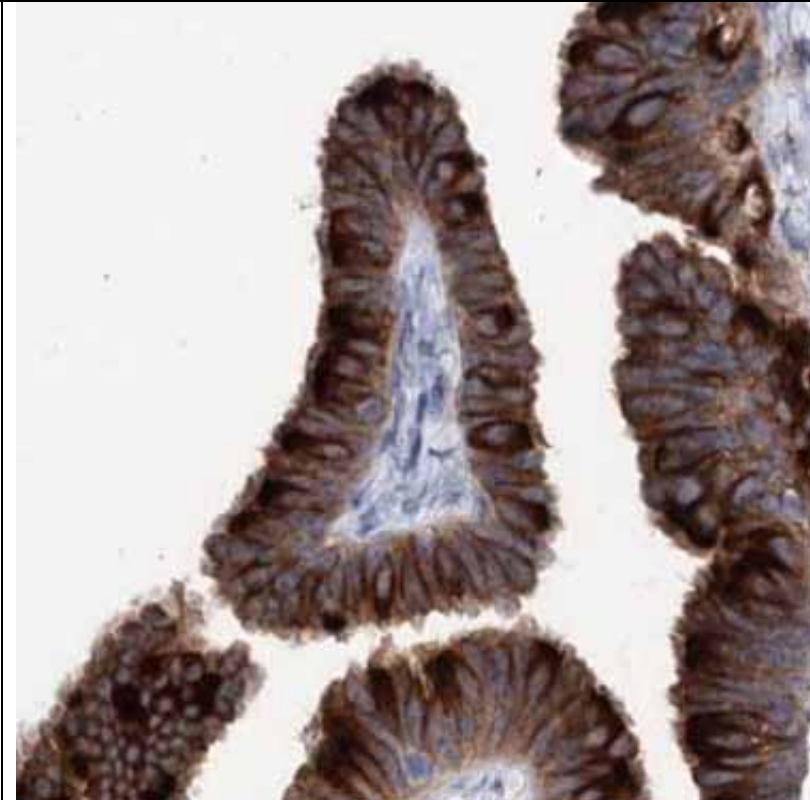

Staining is  
specific to  
*ciliated*  
*cells* (apical  
cytoplasm)

PTGES3  
(antibody  
HPA038673)

Category 1

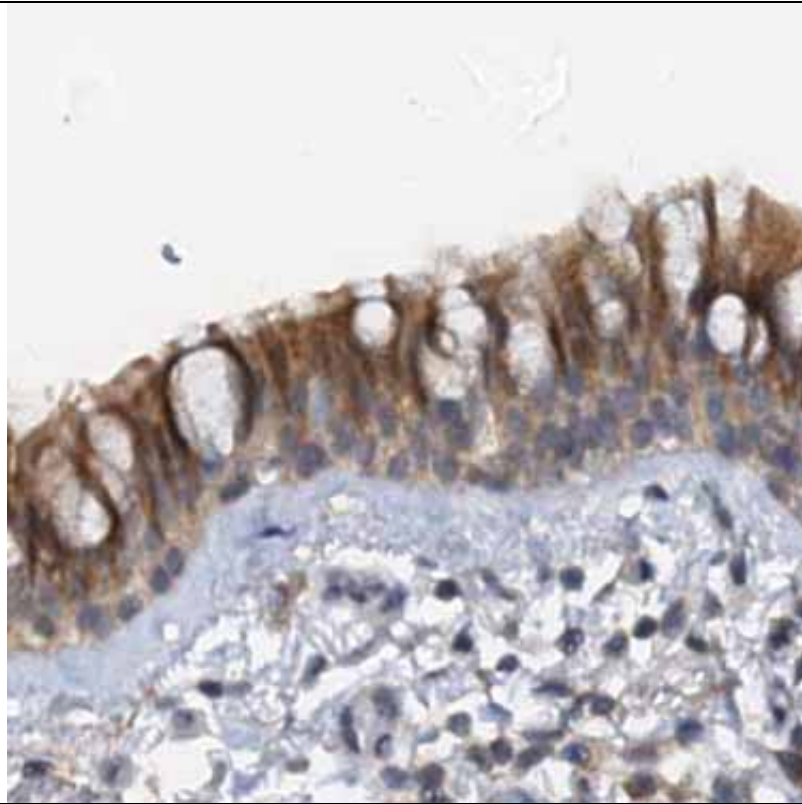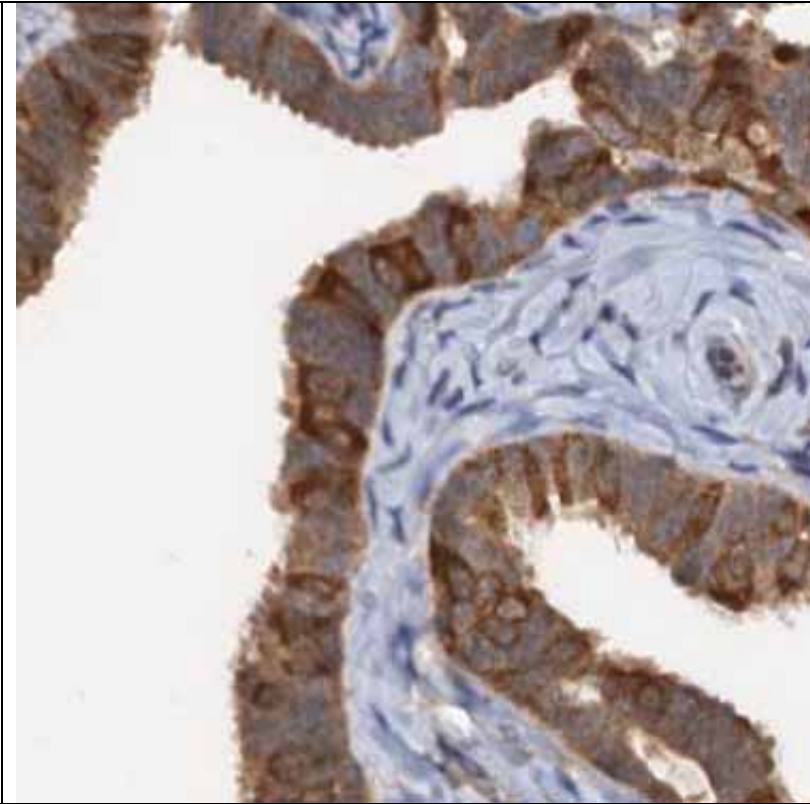

Staining is  
specific to  
*ciliated  
cells*  
(cytoplasm)

RFX3  
(antibody  
HPA035689)

Category 1

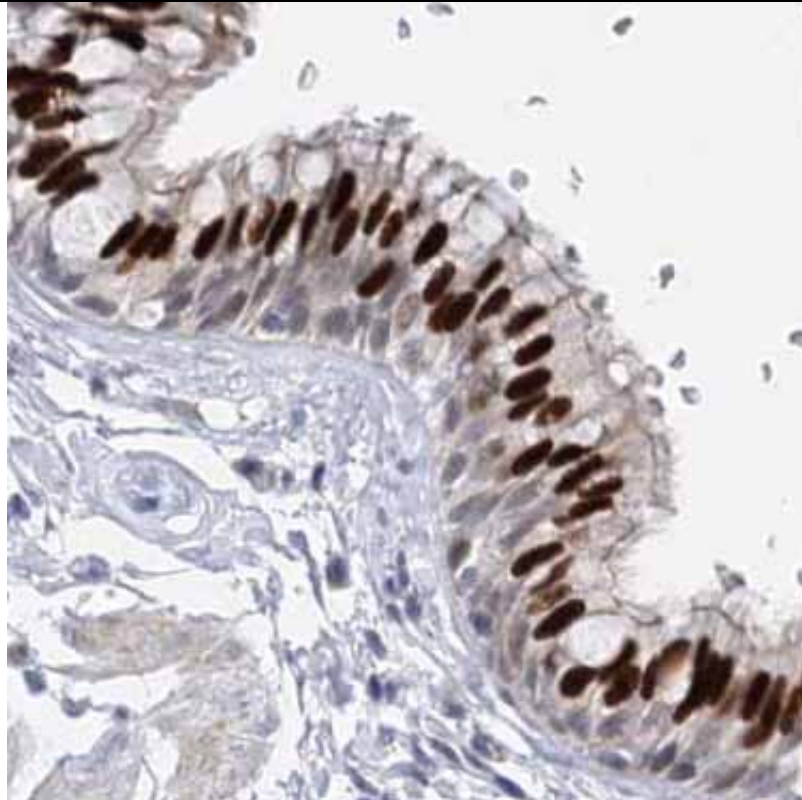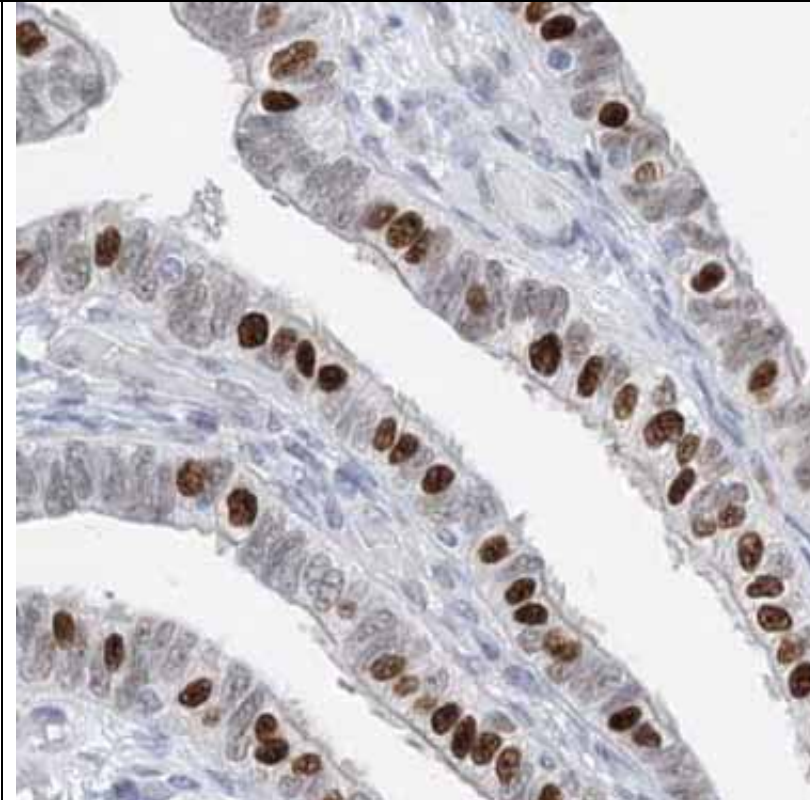

Staining is  
specific to  
*ciliated  
cells*  
(nucleus)

SCGB2A1  
(antibody  
HPA034584)

Category 1

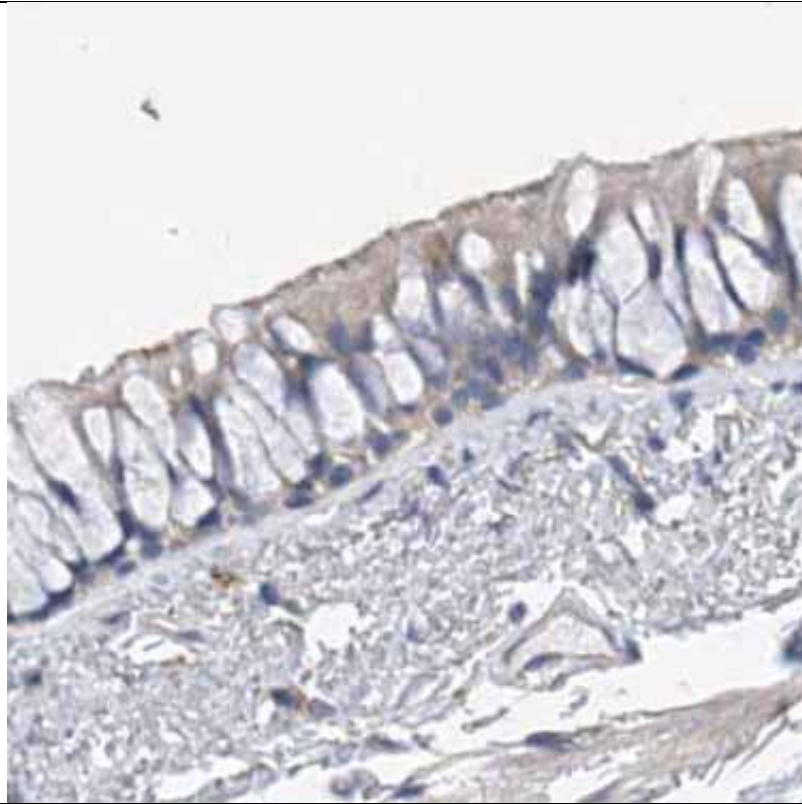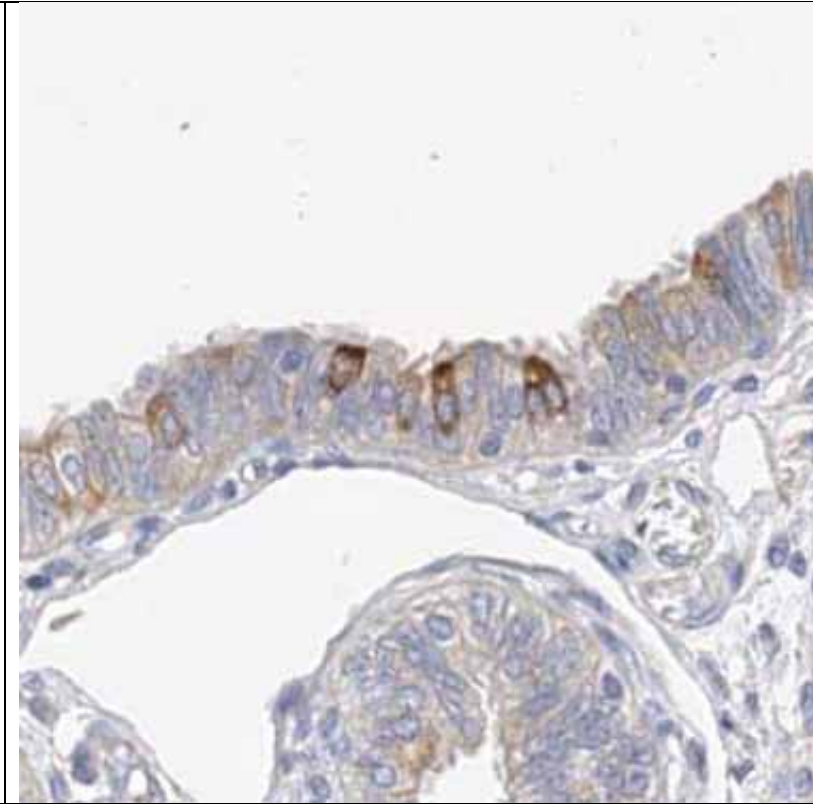

Staining is  
specific to  
*ciliated*  
*cells*  
(uncertain  
subcellular  
localization)

SLC22A4  
(antibody  
CAB015468)

Category 1

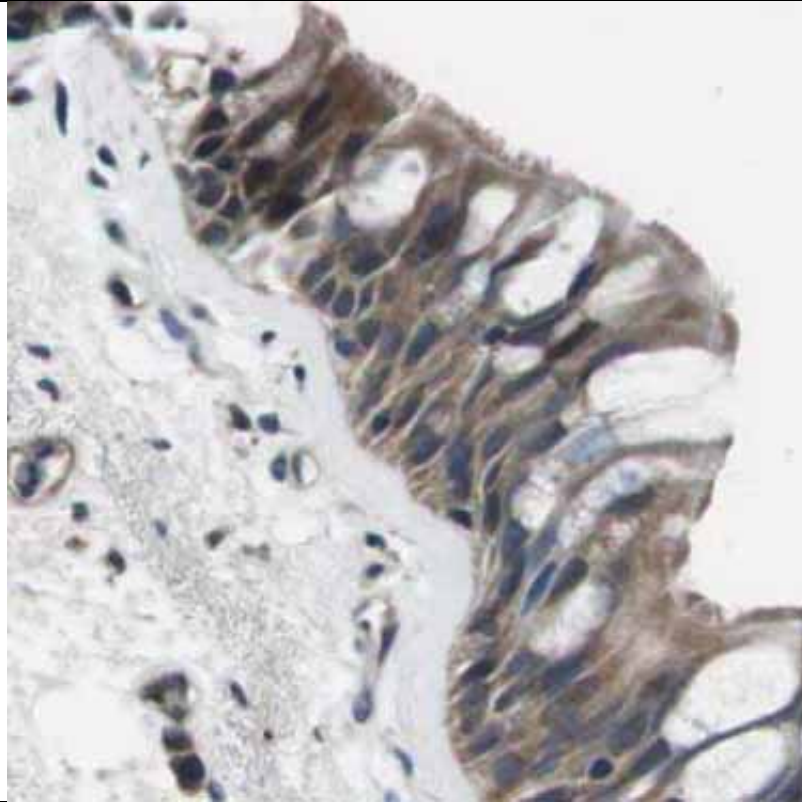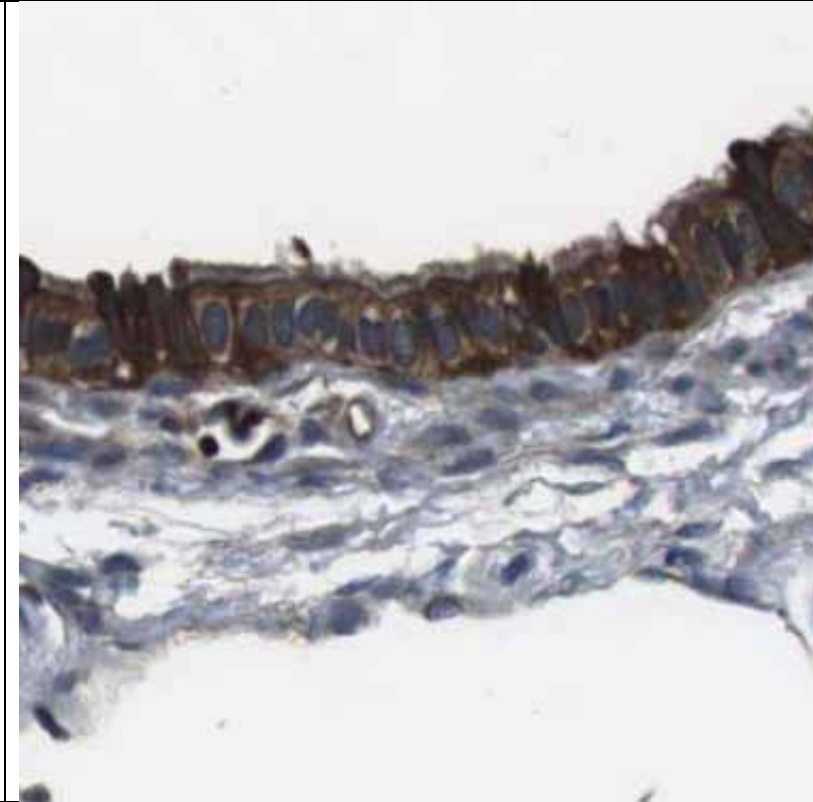

Staining is  
specific to  
*ciliated*  
*cells* (cilia  
and  
cytoplasm)



SLC27A2  
(antibody  
HPA026089)

Category 1

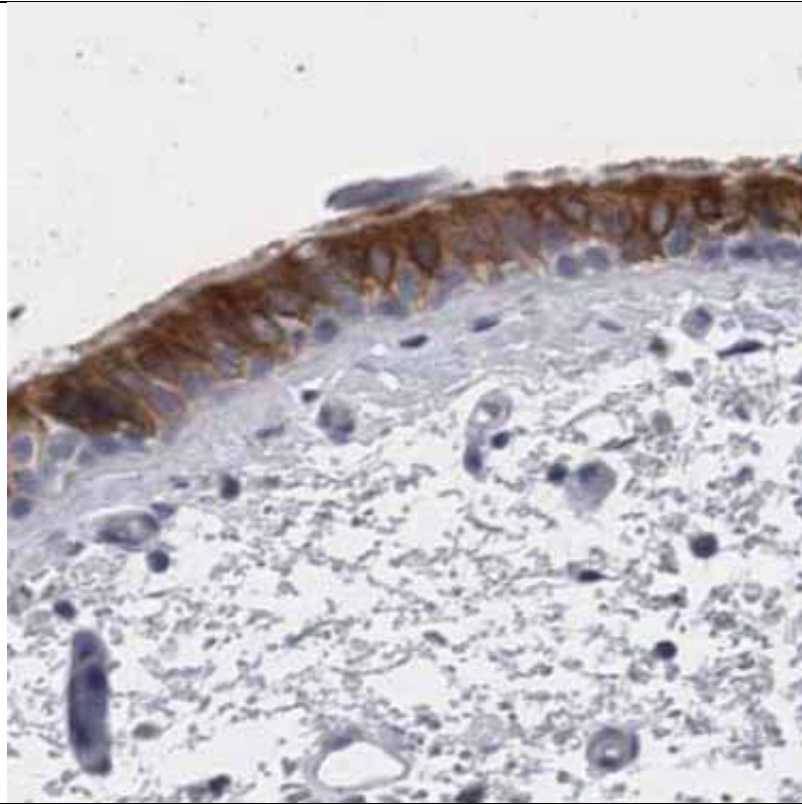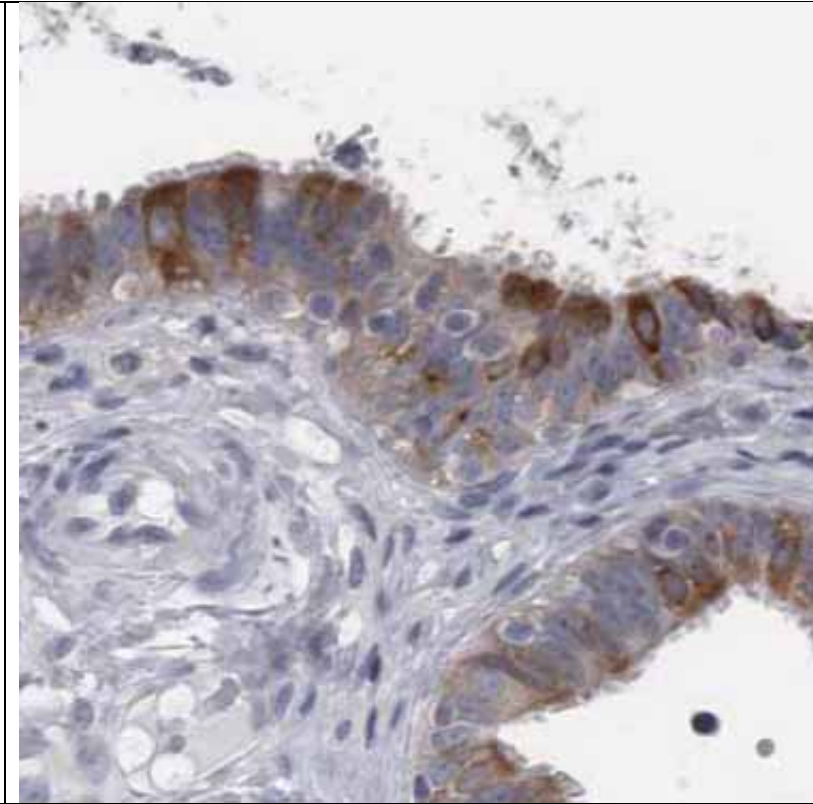

Staining is  
specific to  
*ciliated  
cells*  
(uncertain  
subcellular  
localization)

SPAG16  
(antibody  
HPA037542)

Category 1

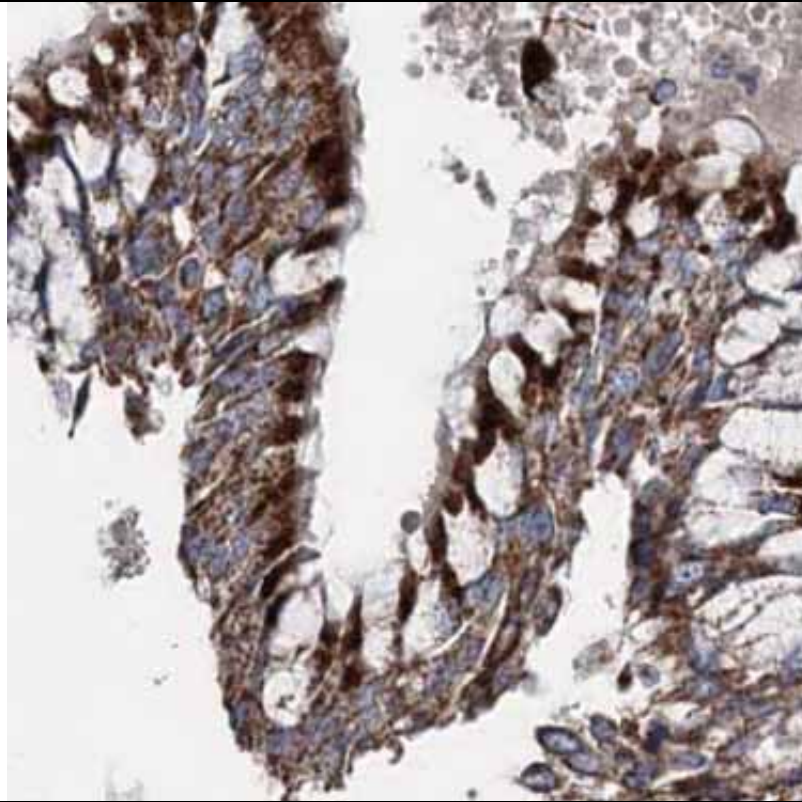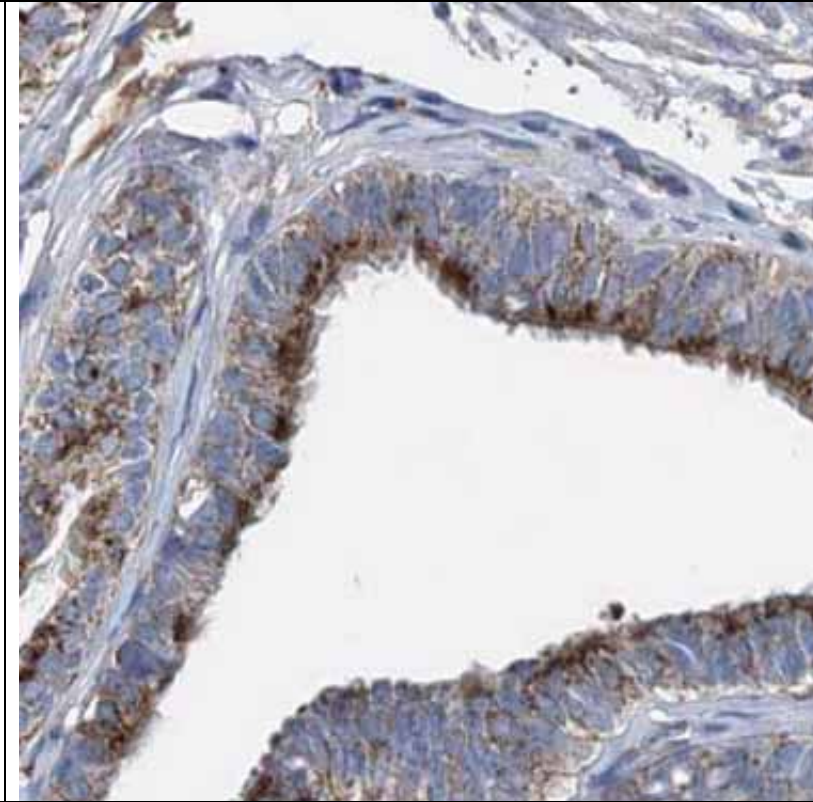

Staining is  
specific to  
*ciliated  
cells*  
(cytoplasm)

SPATA6  
(antibody  
HPA028326)

Category 1

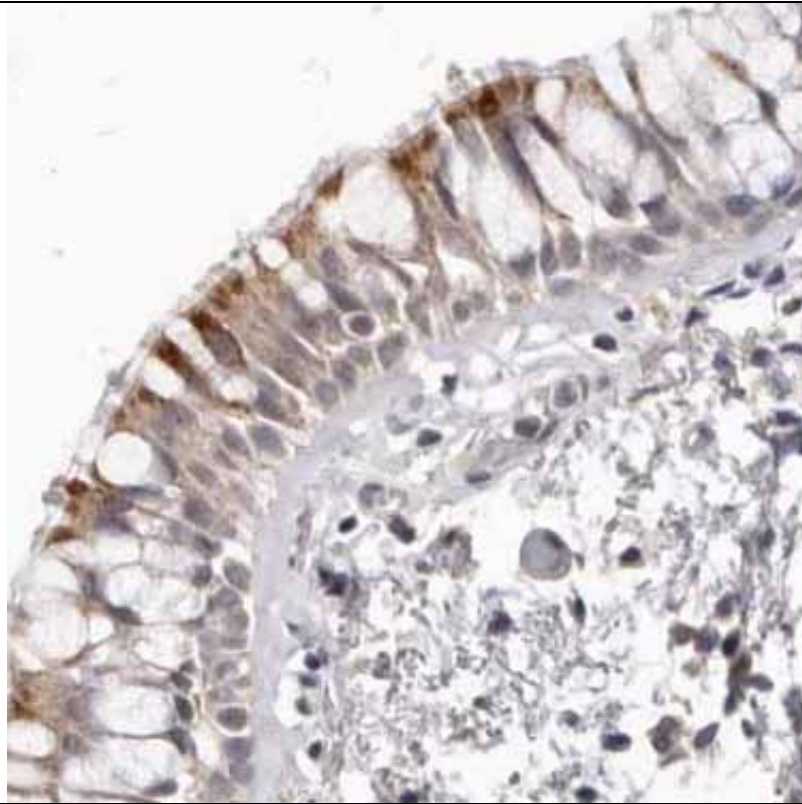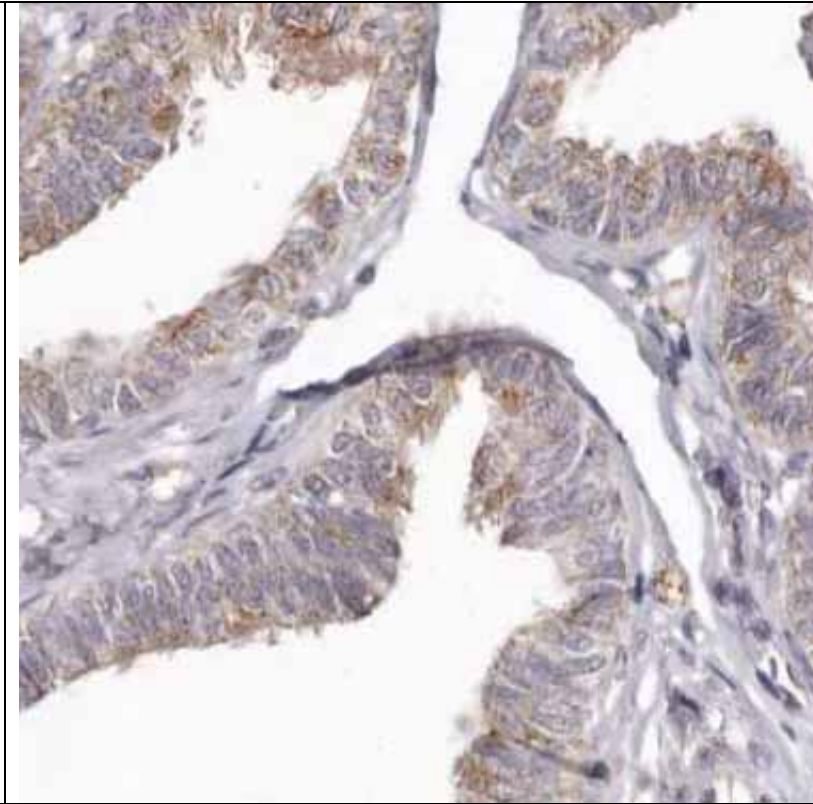

Staining is  
specific to  
*ciliated*  
*cells* (apical  
cytoplasm)

STK33  
(antibody  
HPA015742)

Category 1

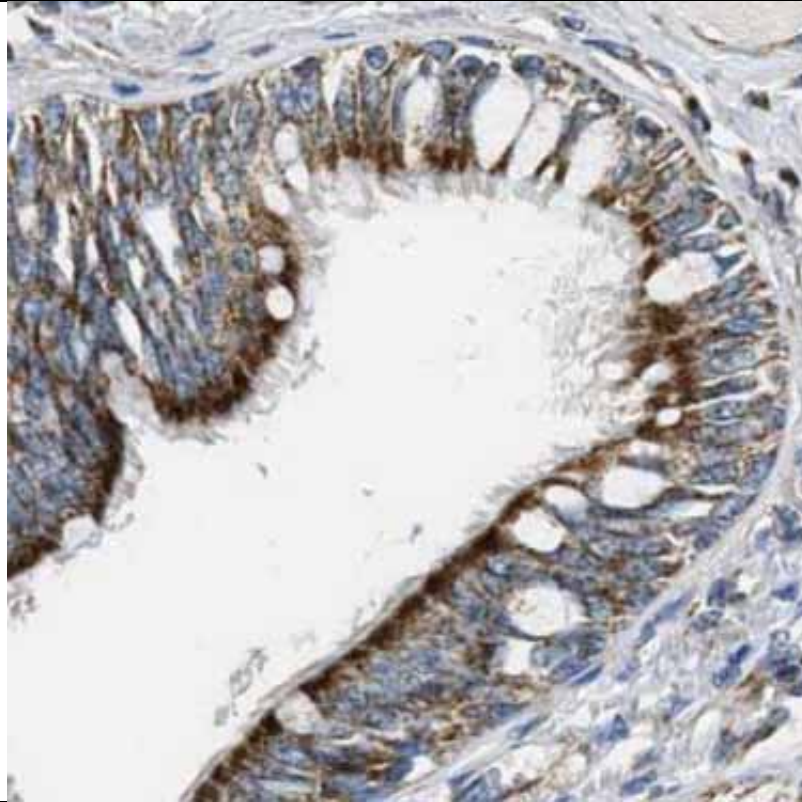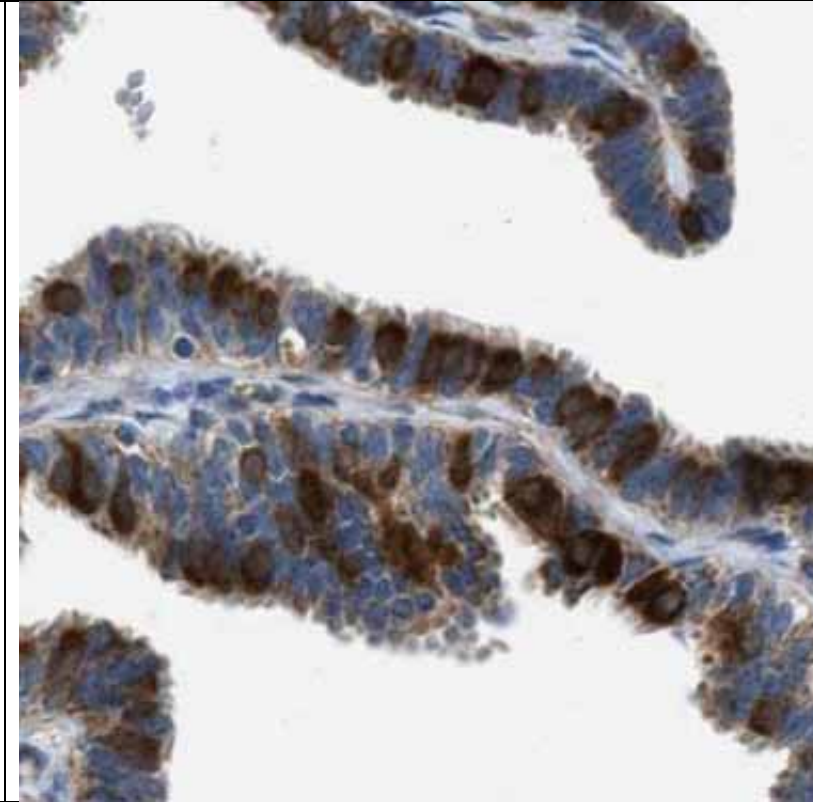

Staining is  
specific to  
*ciliated*  
*cells*  
(cytoplasm)

TMEM67  
(antibody  
HPA039940)

Category 1

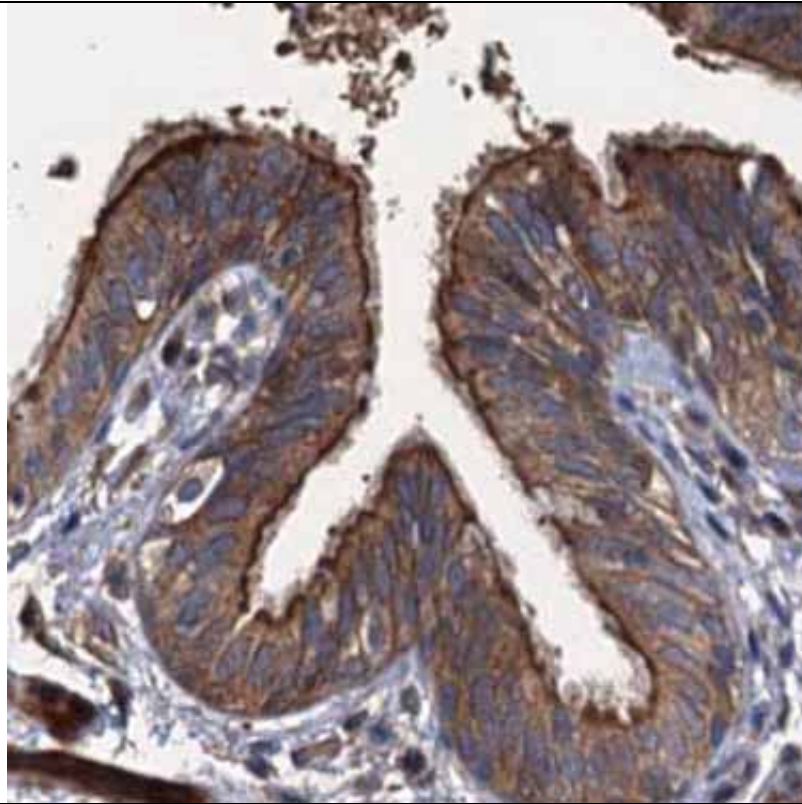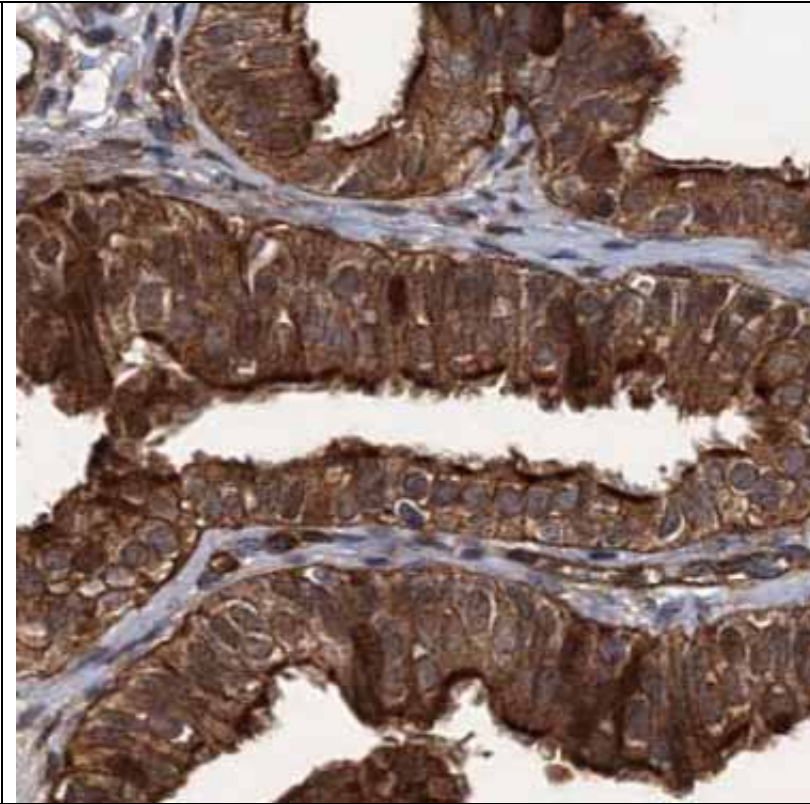

Staining is  
specific to  
*ciliated*  
*cells* (apical  
region of  
cytoplasm)

TRAF3IP1  
(antibody  
HPA037858)

Category 1

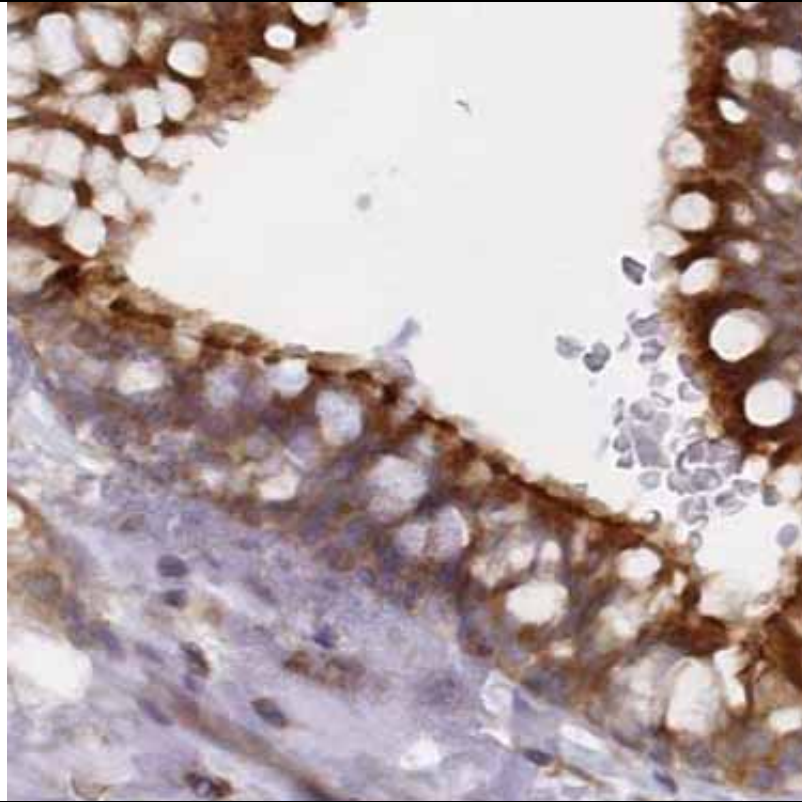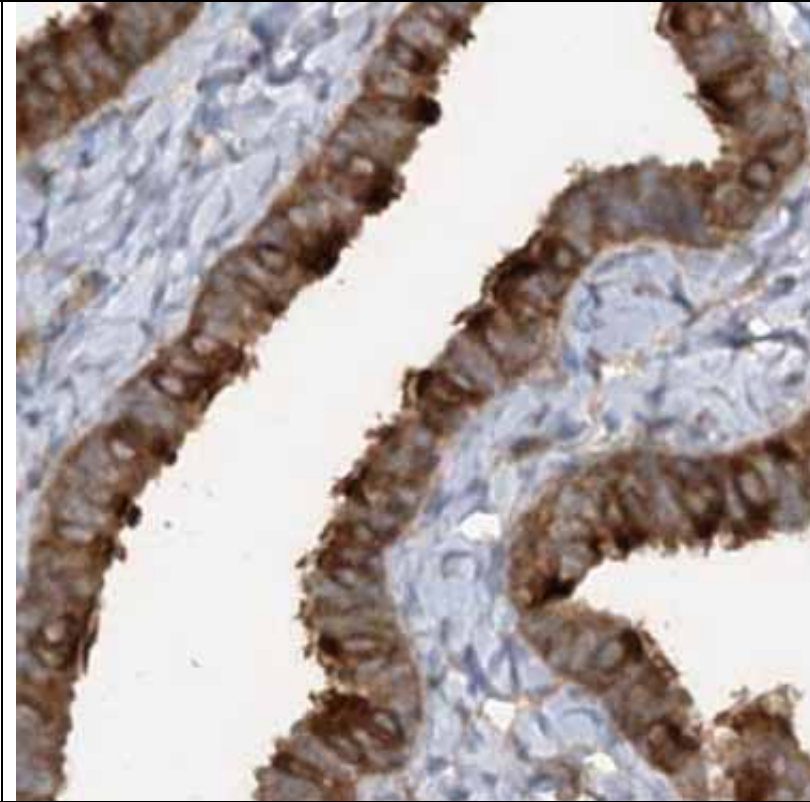

Staining is  
specific to  
*ciliated*  
*cells* (apical  
region of  
cytoplasm)

TSGA10  
(antibody  
HPA036879)  
Category 1

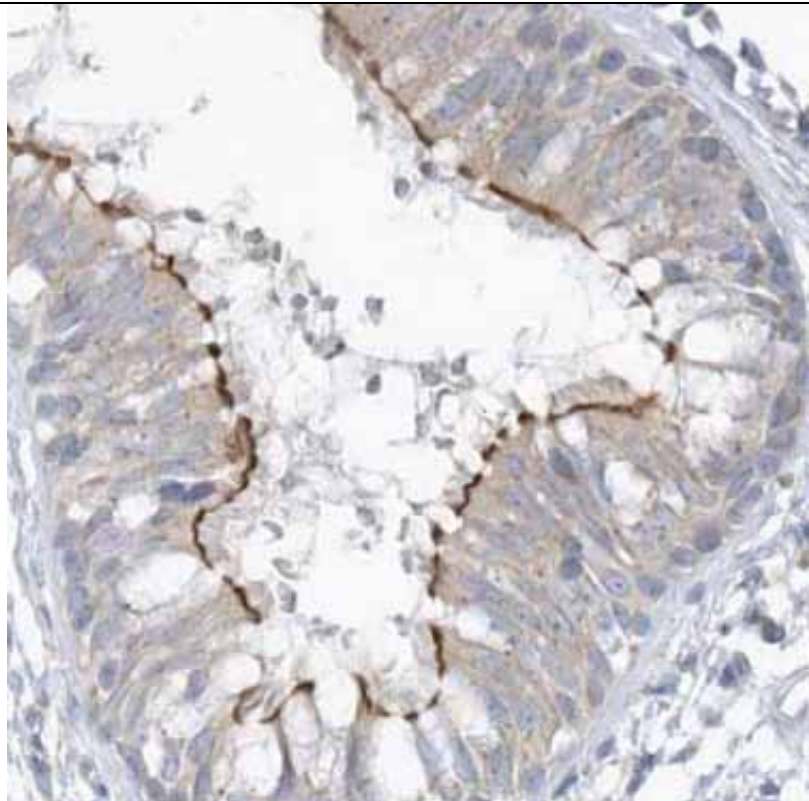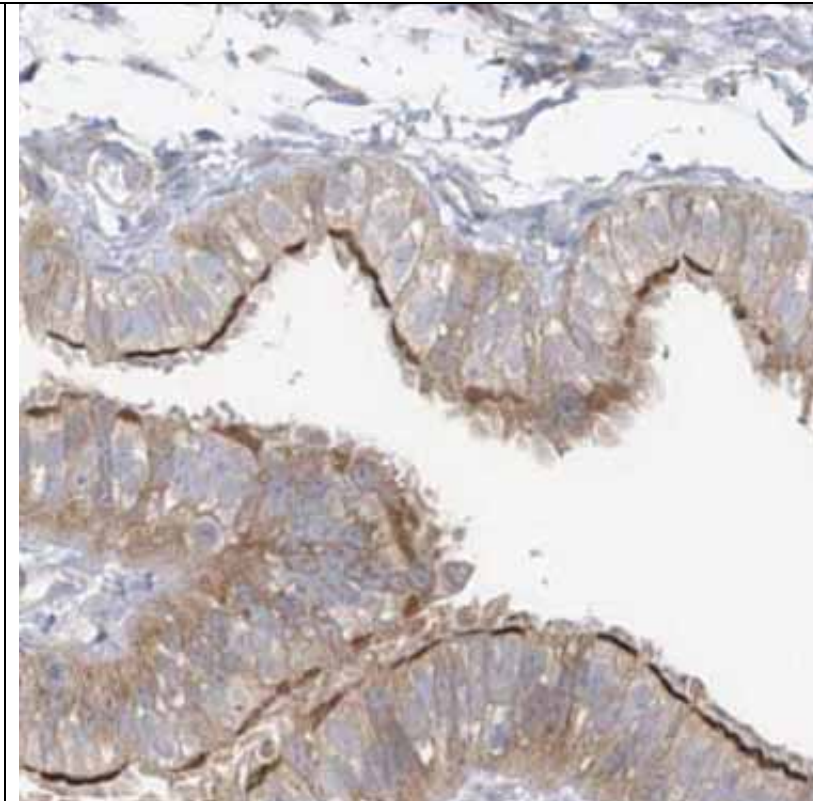

Staining is specific to *ciliated cells* (apical region of cytoplasm)

TTL6  
(antibody  
HPA023653)  
Category 1

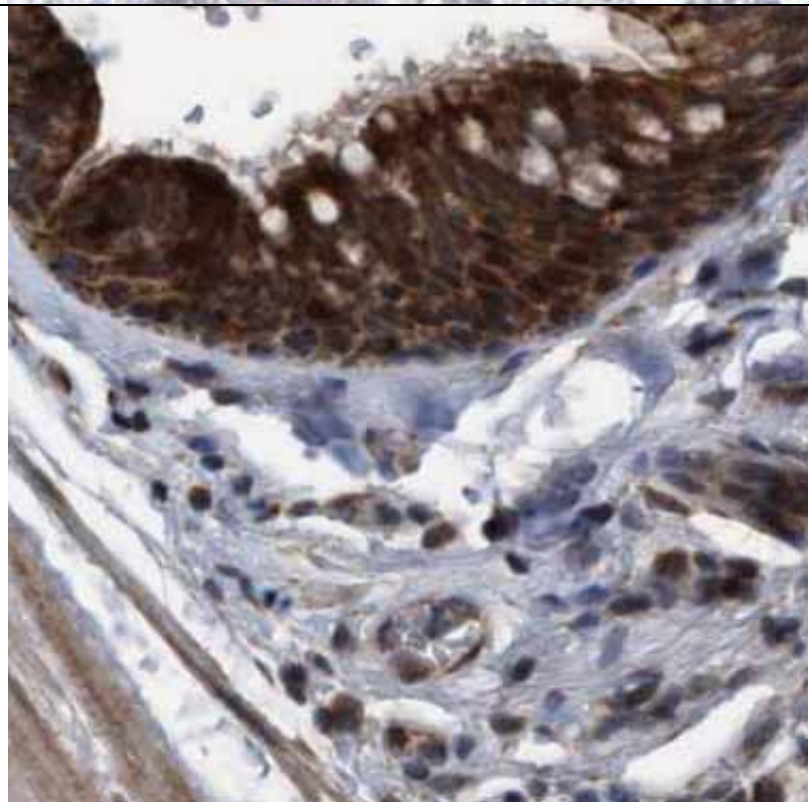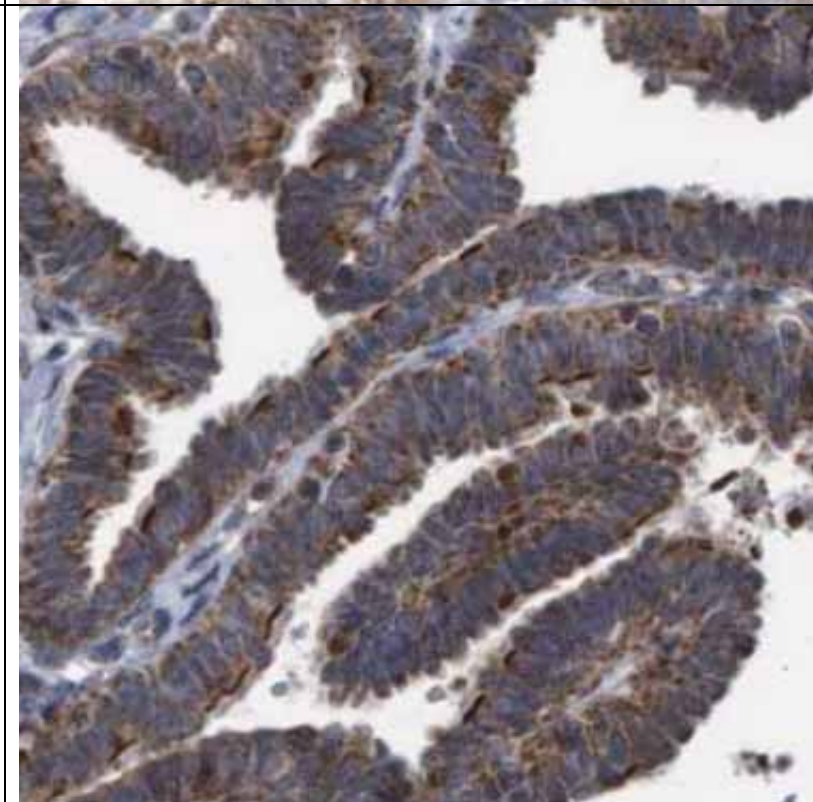

Staining is specific to *ciliated cells* (apical region of cytoplasm)

VWA3B  
(antibody  
HPA036701)

Category 1

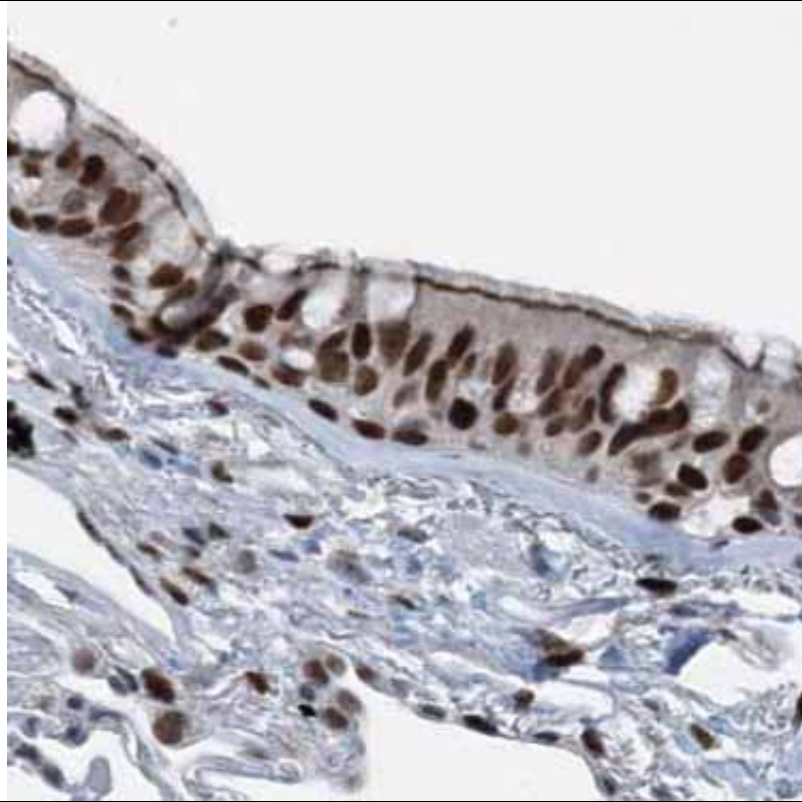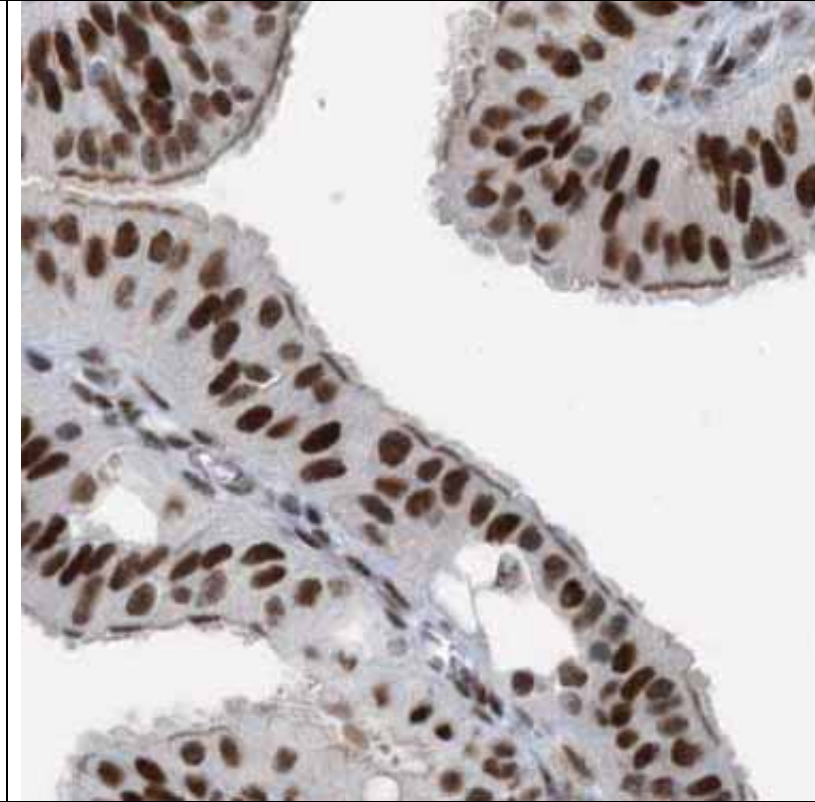

Staining is specific to *ciliated cells* (nucleus & apical region of cytoplasm)

ZNF474  
(antibody  
HPA036595)

Category 1

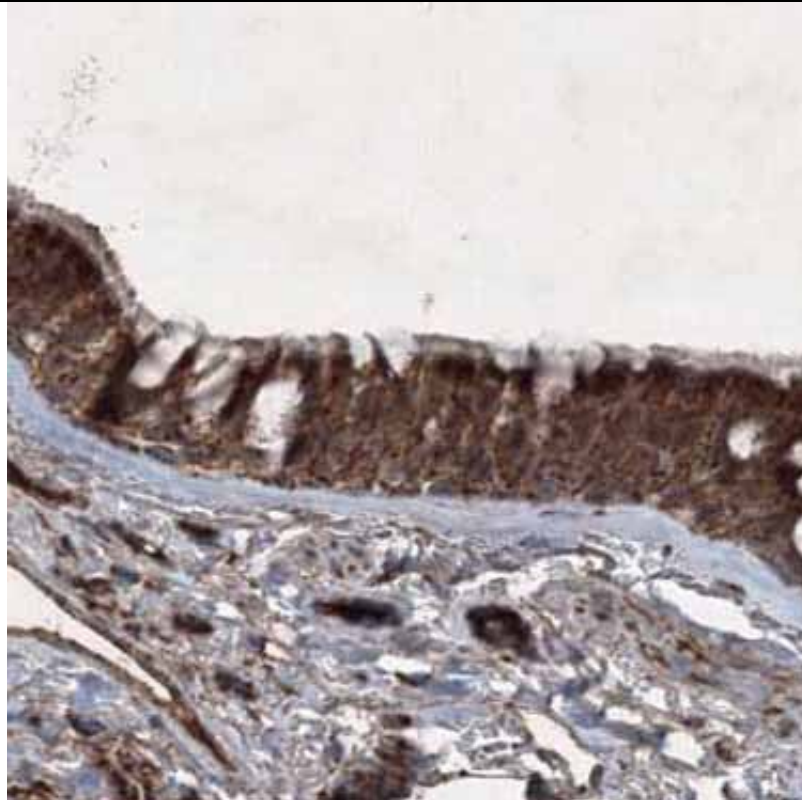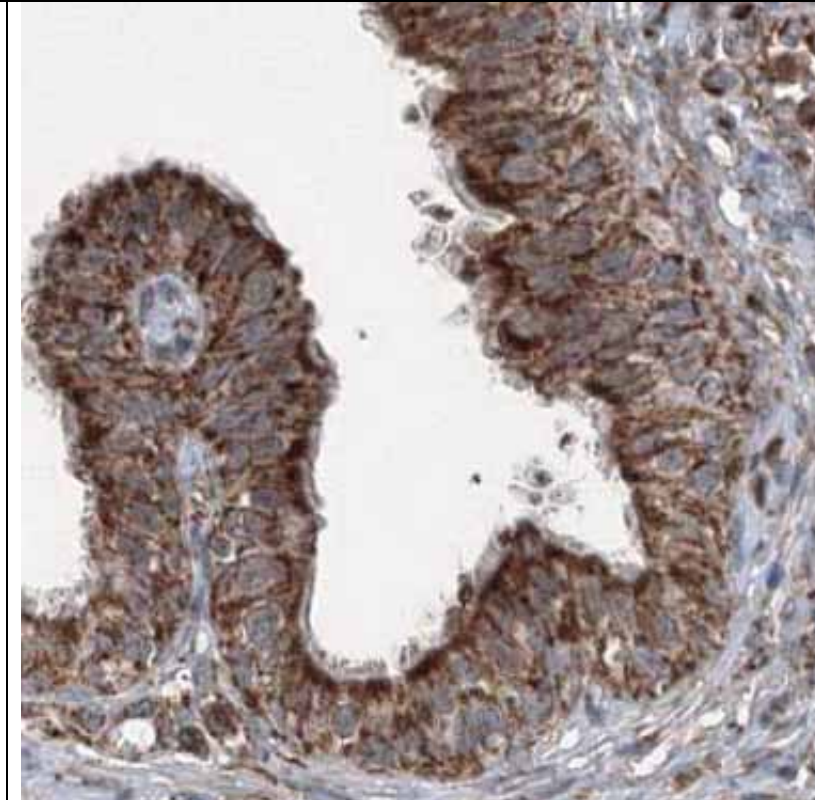

Staining is specific to *ciliated cells* (apical region of cytoplasm)

CAT  
(antibody  
CAB001515)

Category 1

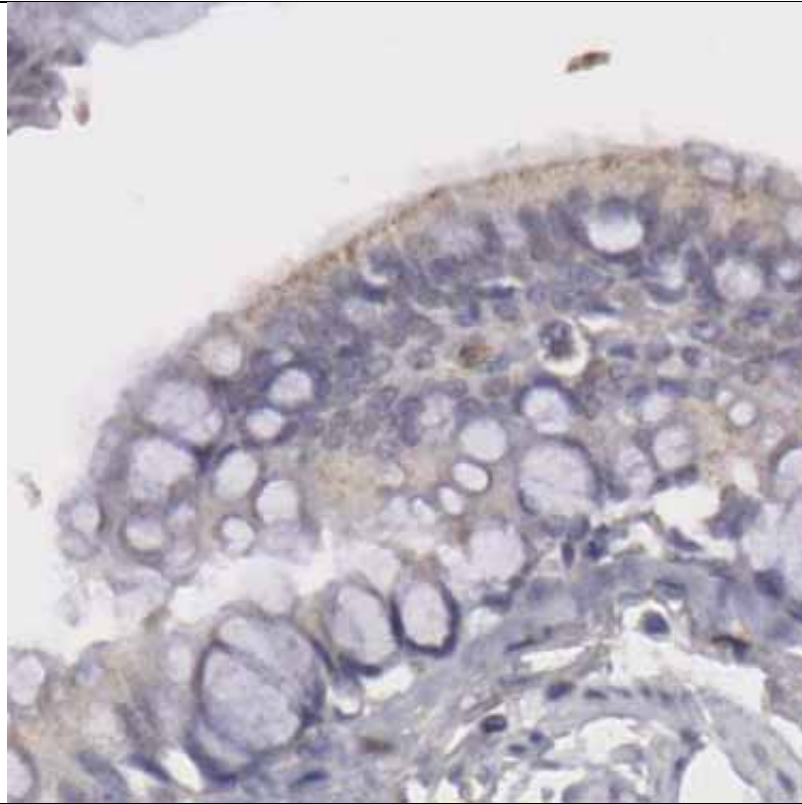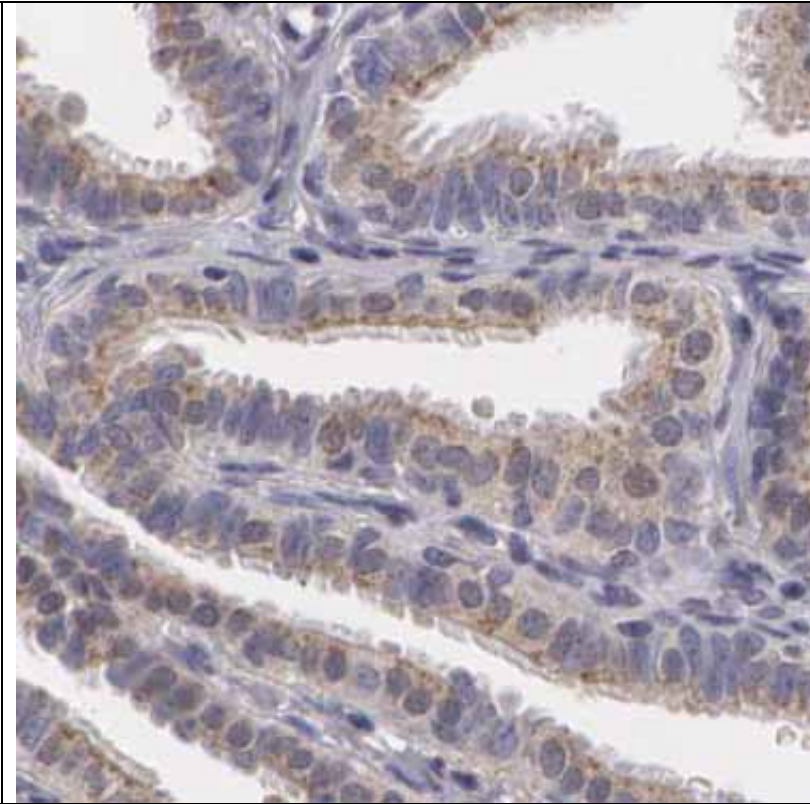

Staining is  
non-specific  
to ciliated  
cells or  
absent

CCDC17  
(antibody  
HPA028338)

Category 1

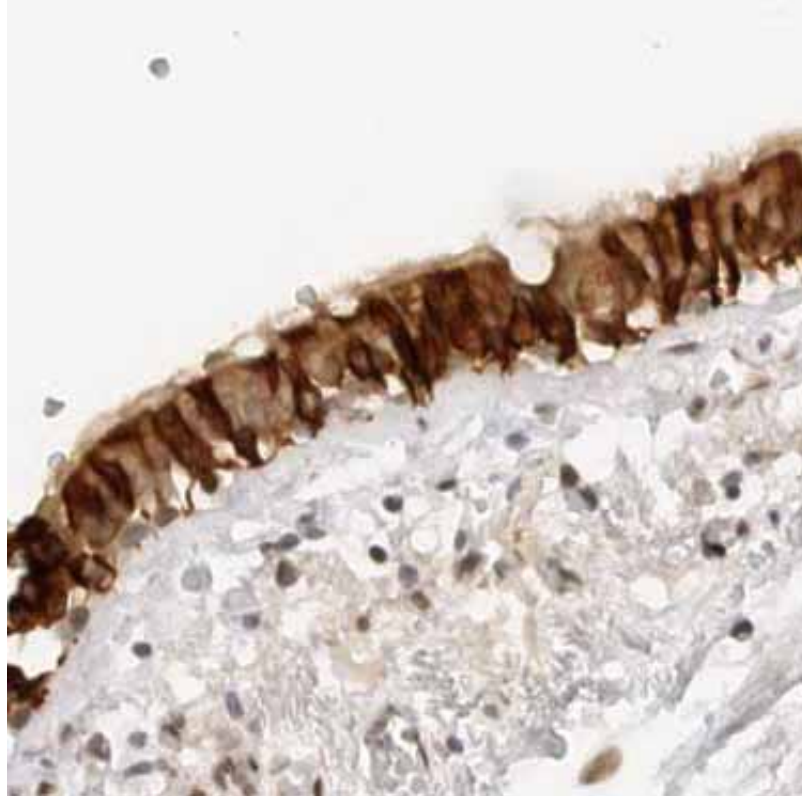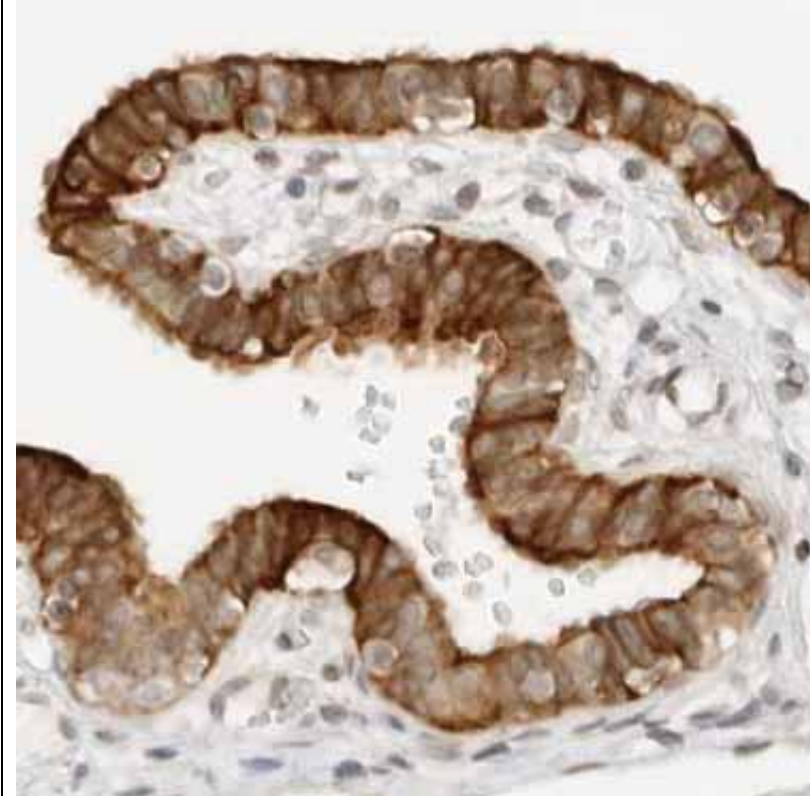

Staining is  
non-specific  
to ciliated  
cells or  
absent

CCDC65  
(antibody  
HPA038520)

Category 1

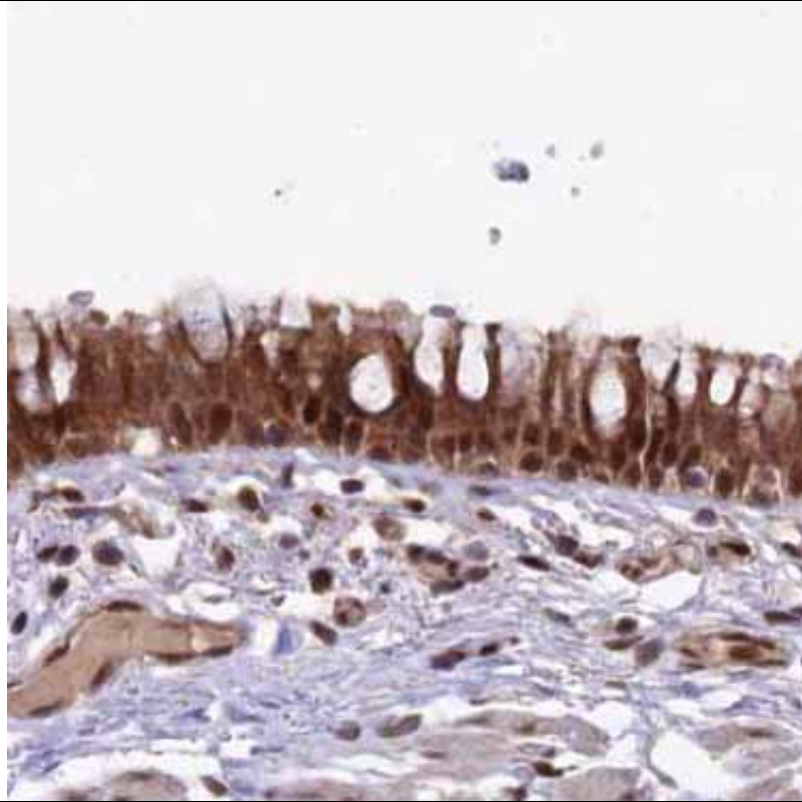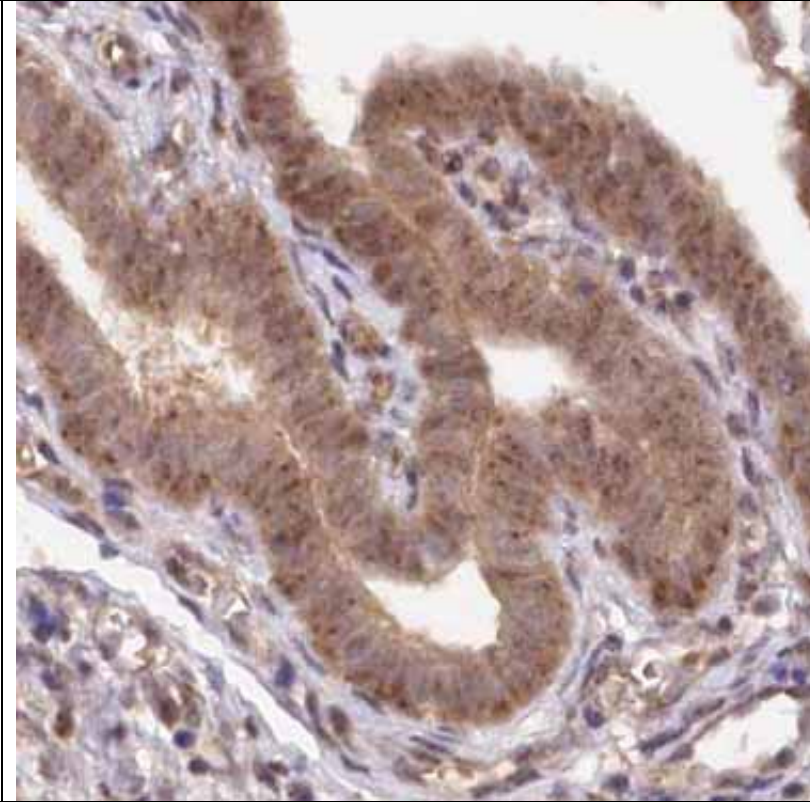

Staining is  
non-specific  
to ciliated  
cells or  
absent

CHST9  
(antibody  
HPA011393)

Category 1

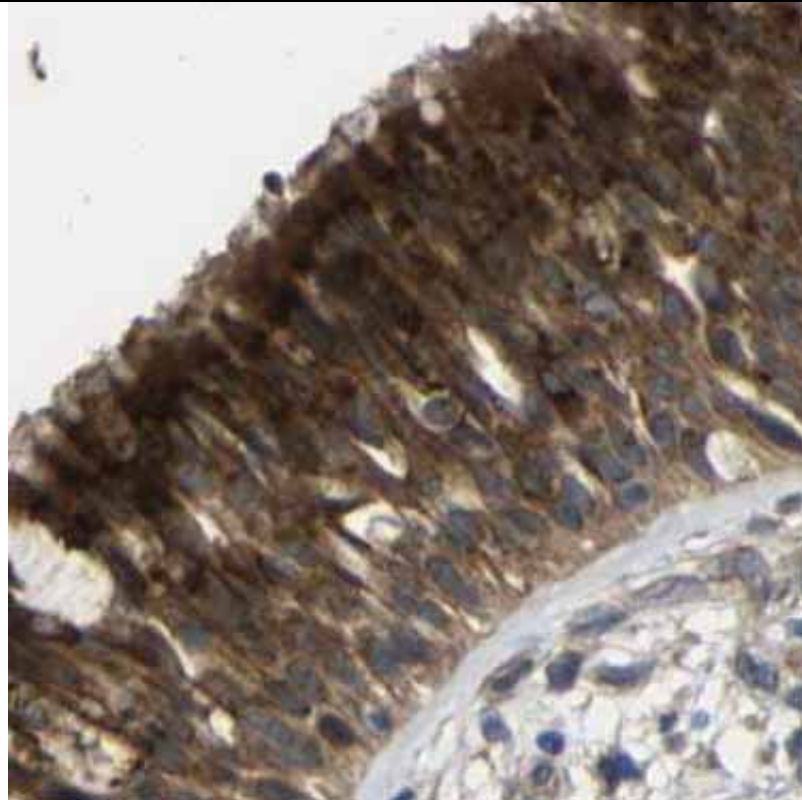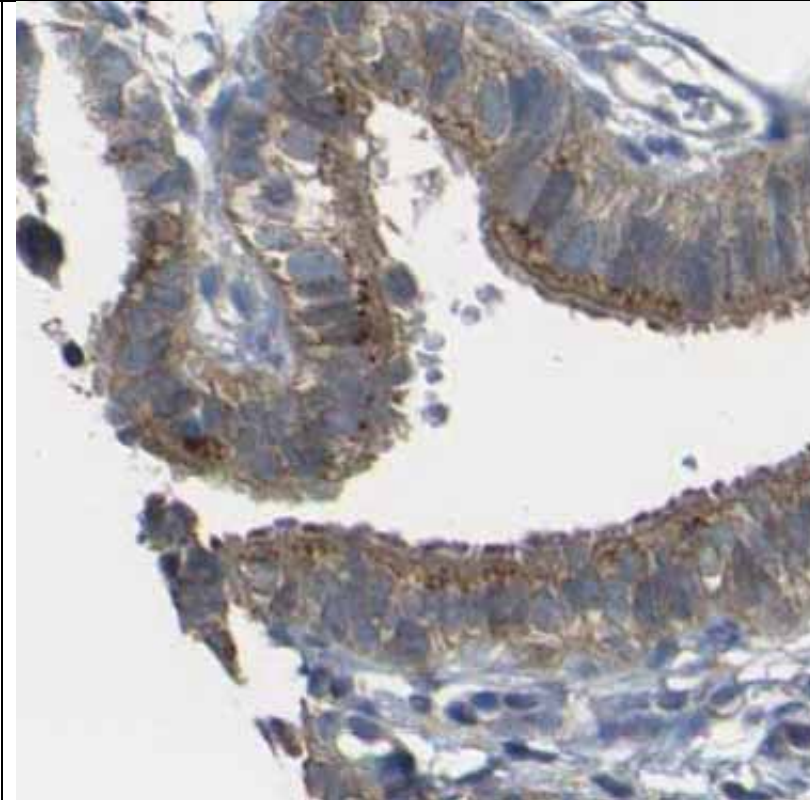

Staining is  
non-specific  
to ciliated  
cells or  
absent

C14orf45  
(antibody  
HPA003136)  
Category 1

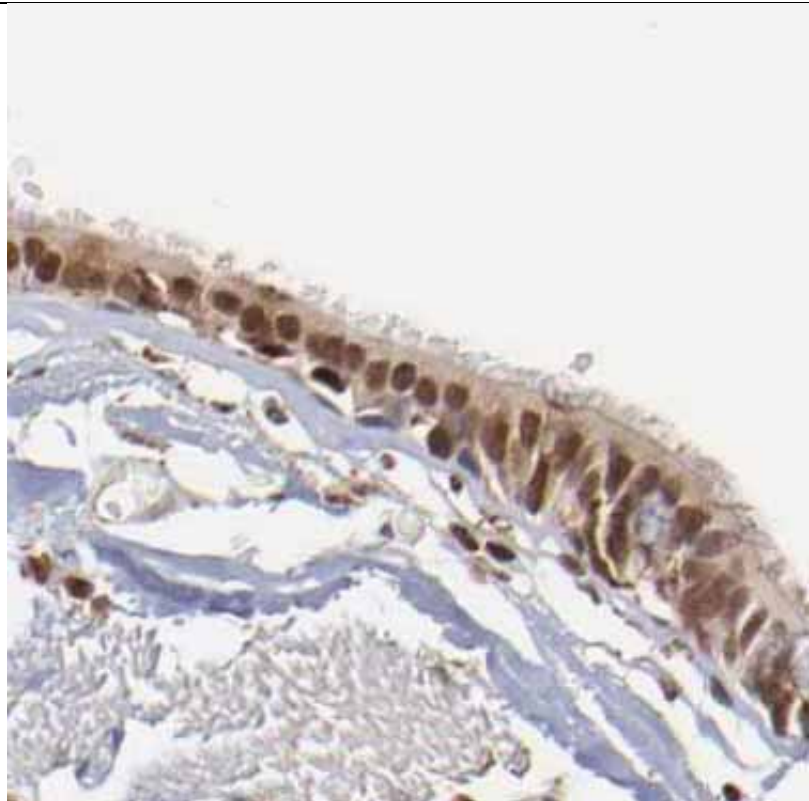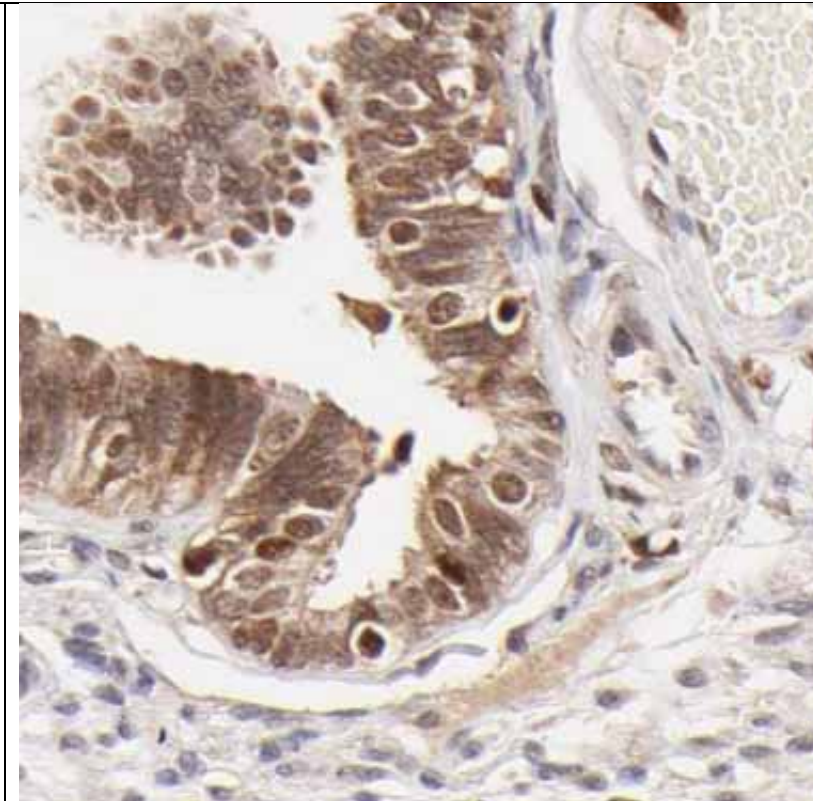

Staining is  
non-specific  
to ciliated  
cells or  
absent

C14orf50  
(antibody  
HPA036801)  
Category 1

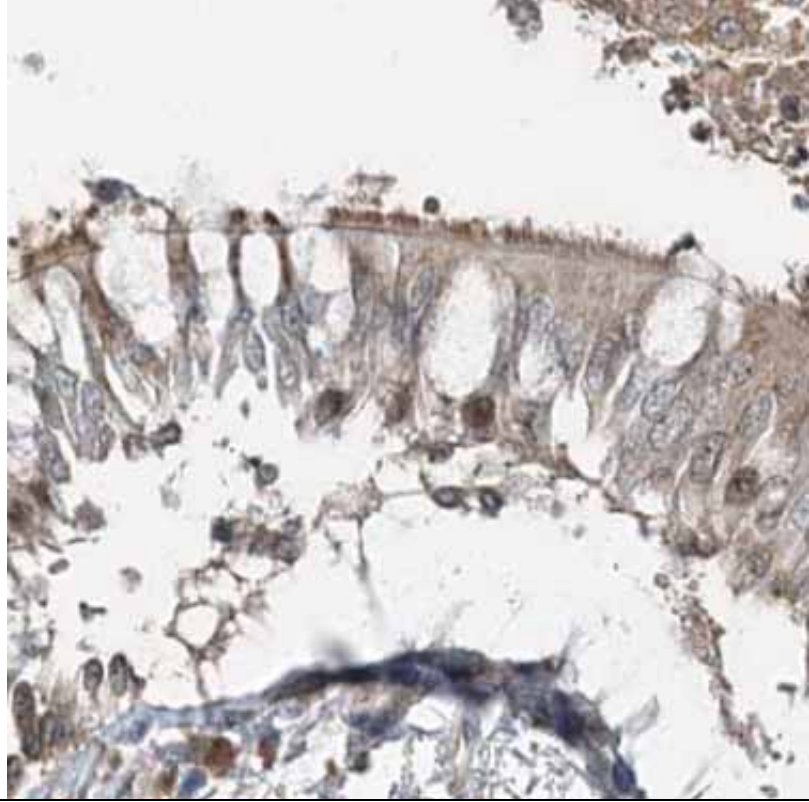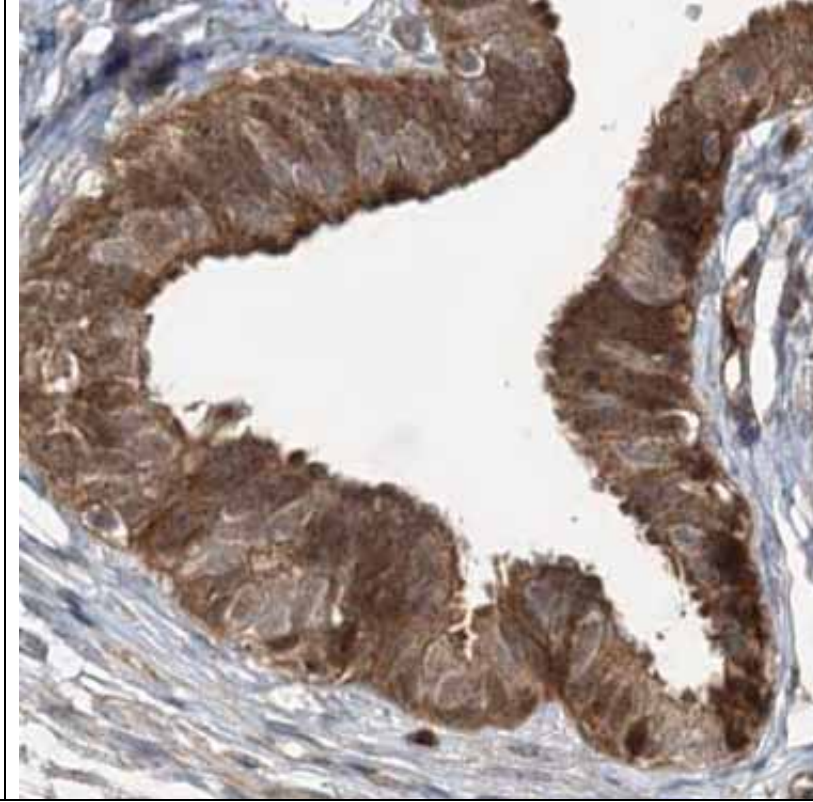

Staining is  
non-specific  
to ciliated  
cells or  
absent



C2orf40  
(antibody  
HPA008546)

Category 1

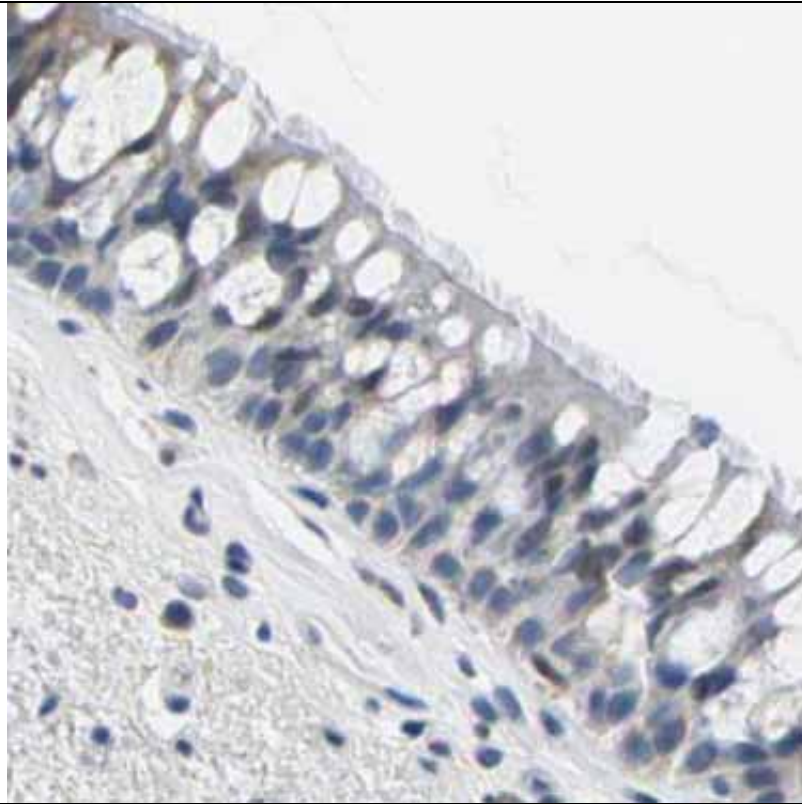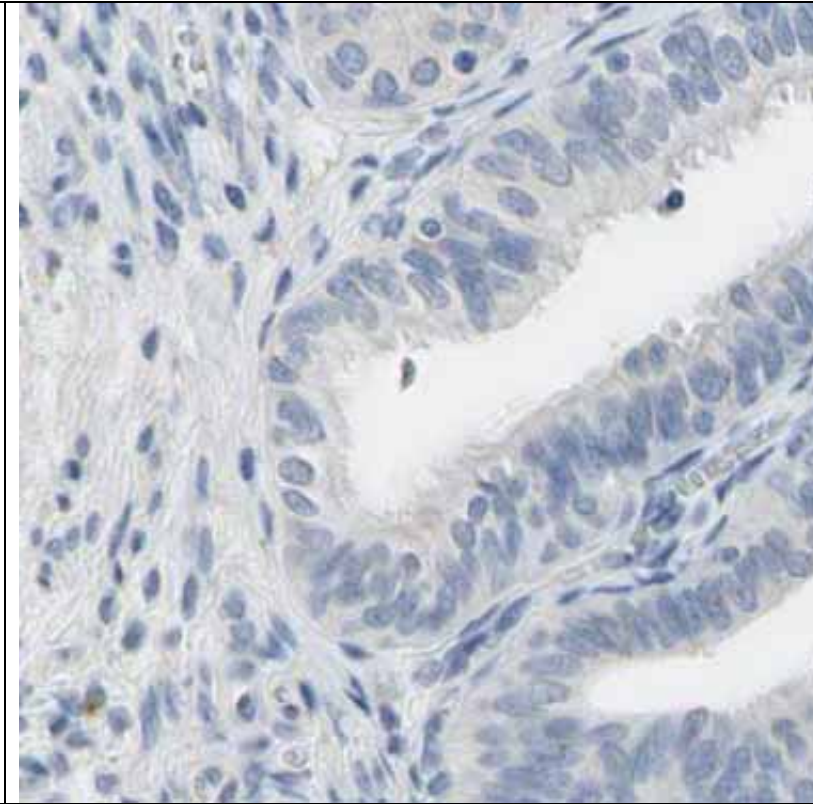

Staining is  
non-specific  
to ciliated  
cells or  
absent

DNAJA4  
(antibody  
CAB004646)

Category 1

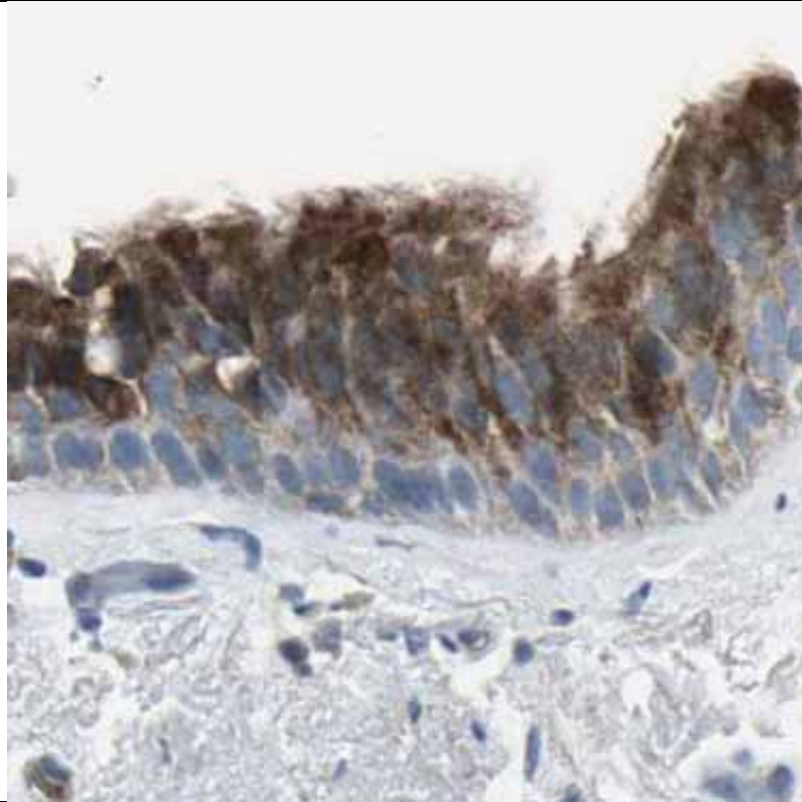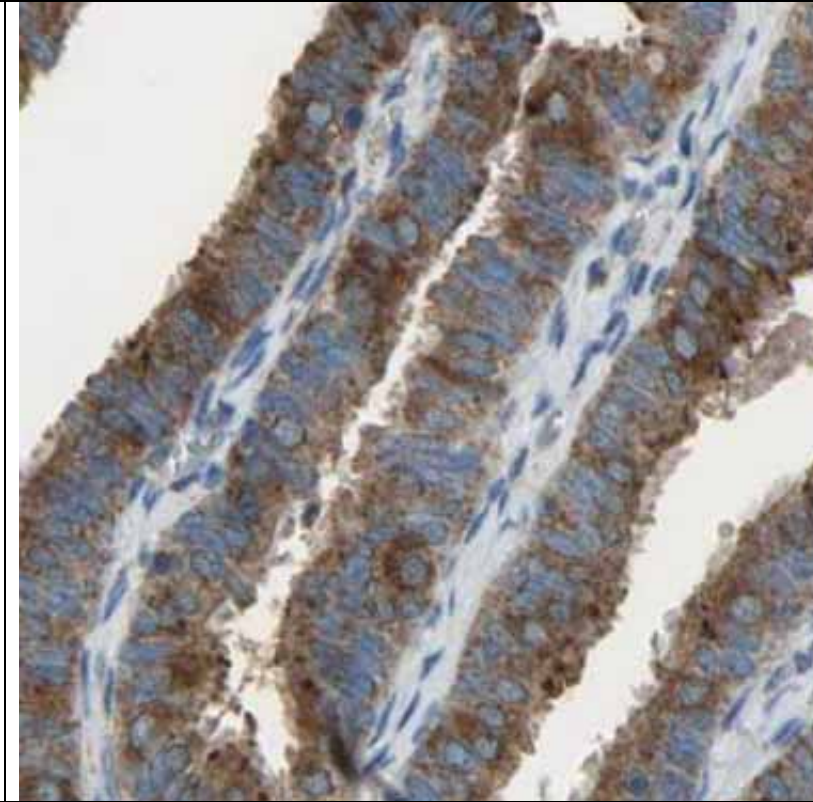

Staining is  
non-specific  
to ciliated  
cells or  
absent

GMPR  
(antibody  
HPA000904)  
Category 1

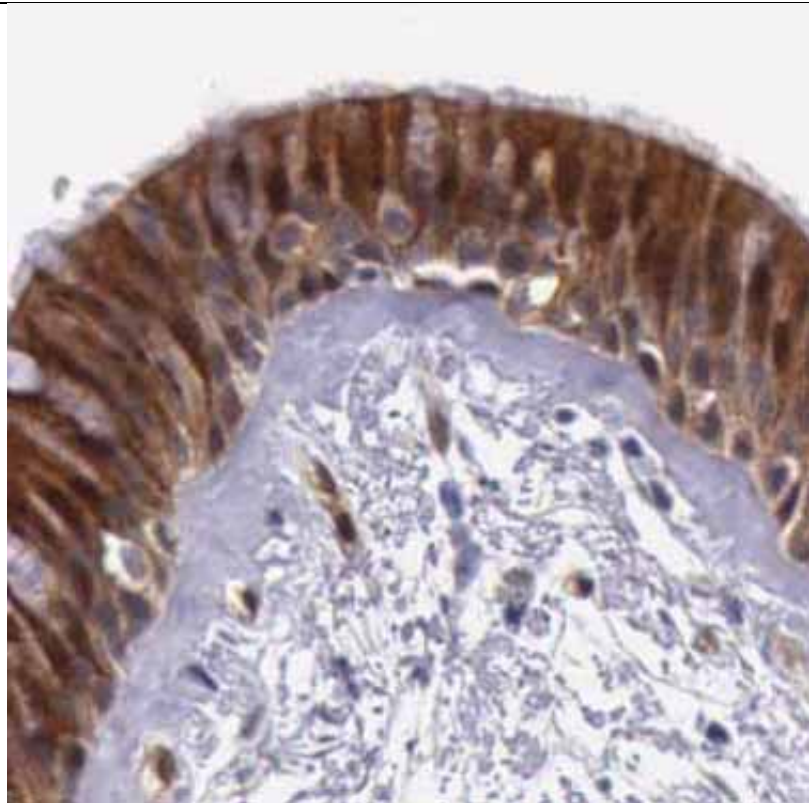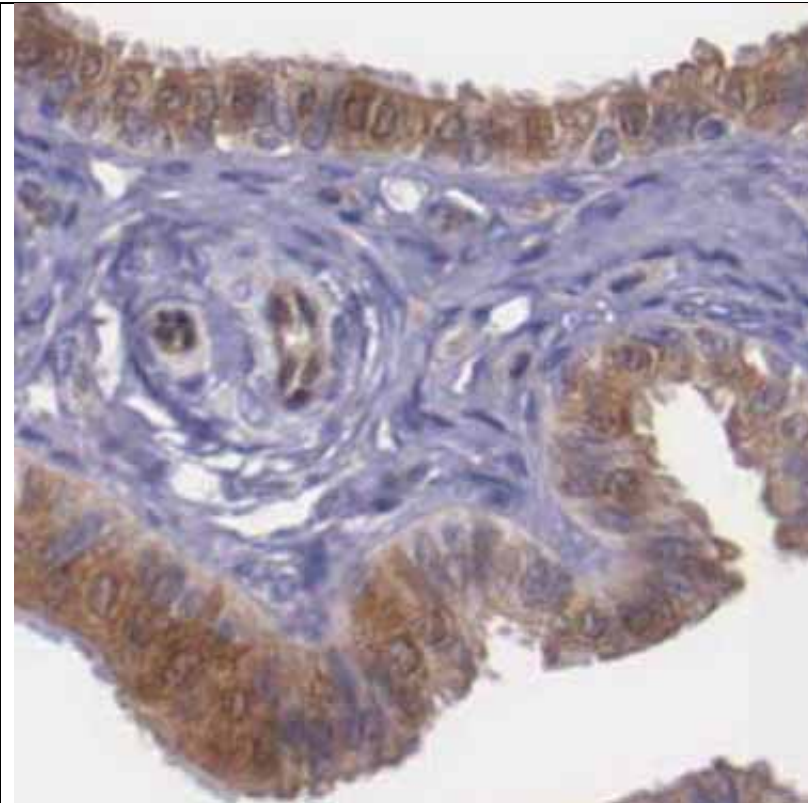

Staining is  
non-specific  
to ciliated  
cells or  
absent

HKDC1  
(antibody  
HPA011956)  
Category 1

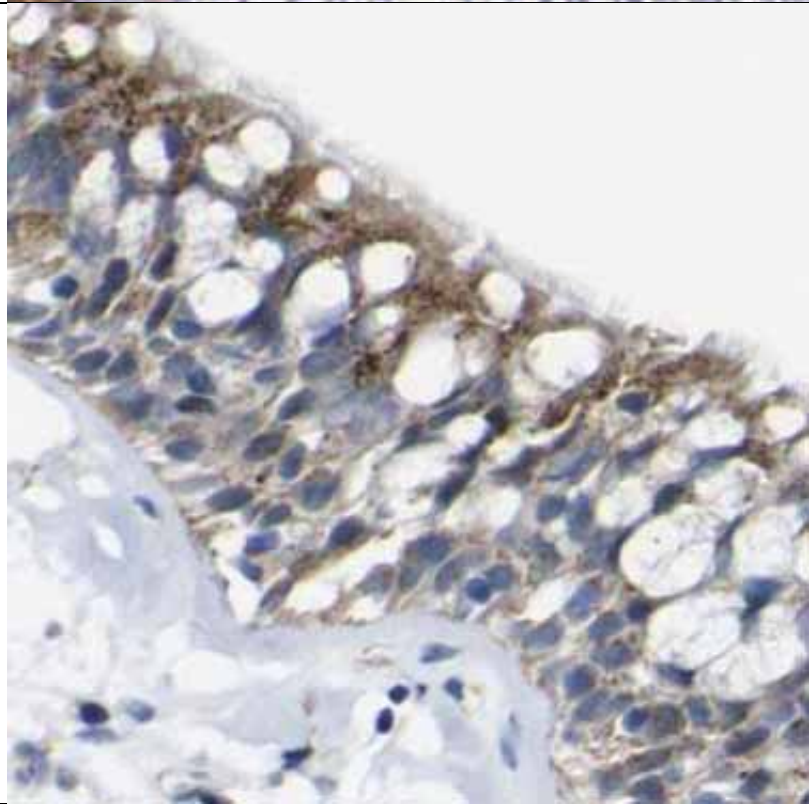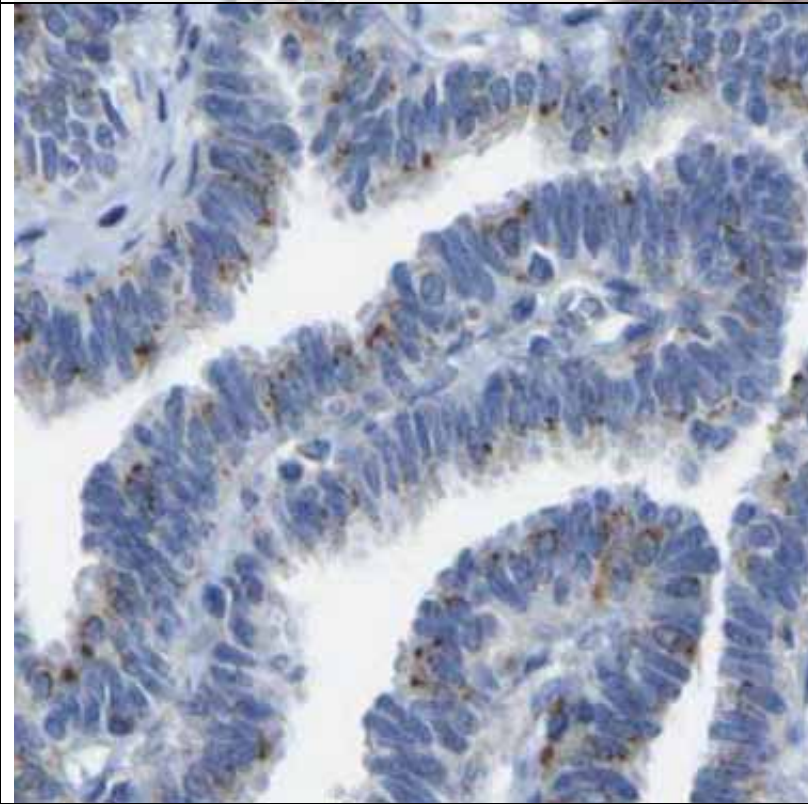

Staining is  
non-specific  
to ciliated  
cells or  
absent

IK  
(antibody  
HPA019754)

Category 1

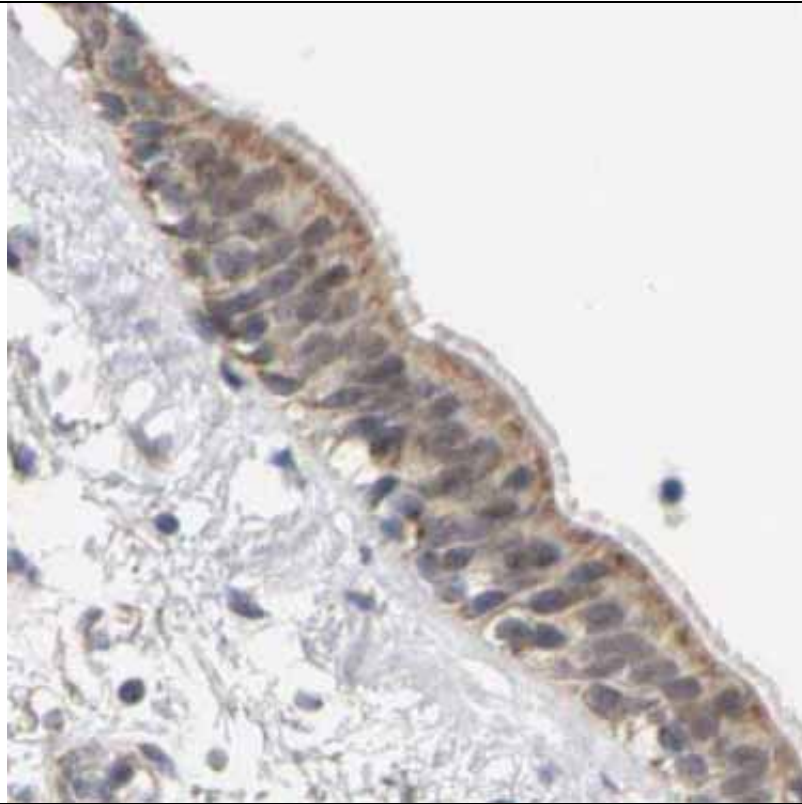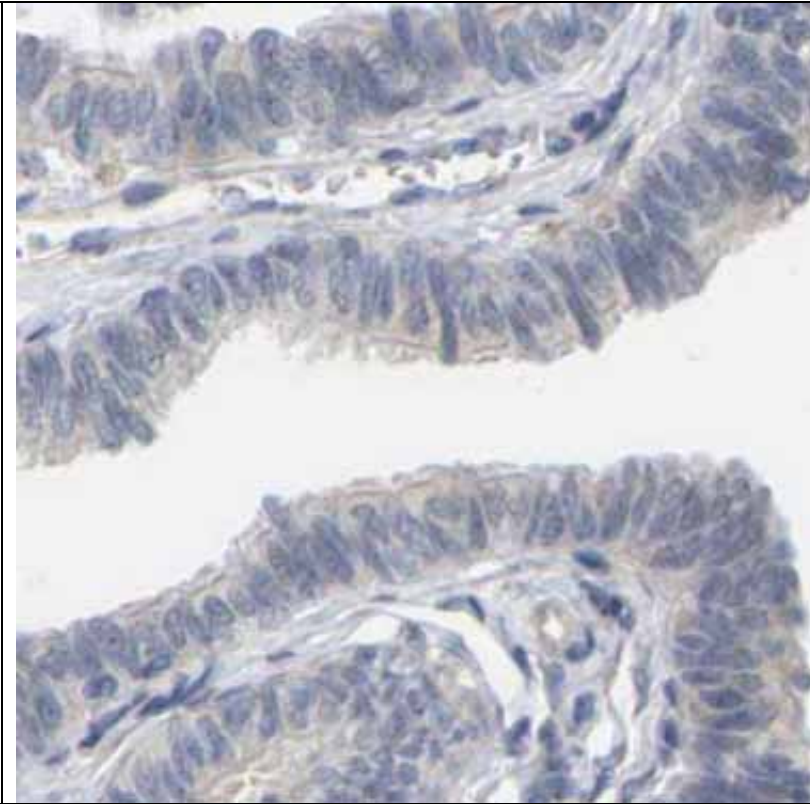

Staining is  
non-specific  
to ciliated  
cells or  
absent

IQCH  
(antibody  
HPA040845)

Category 1

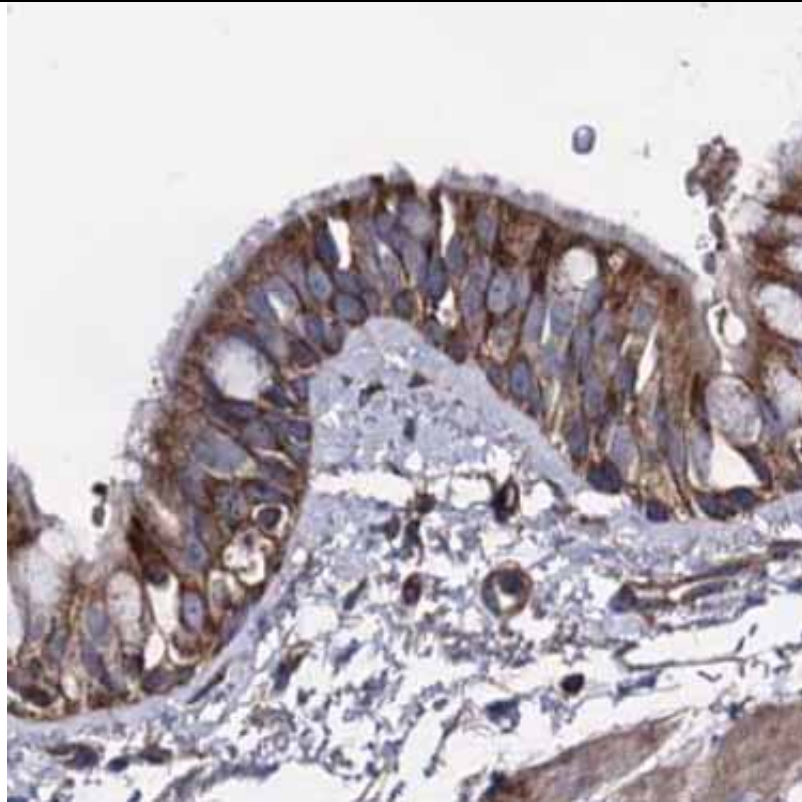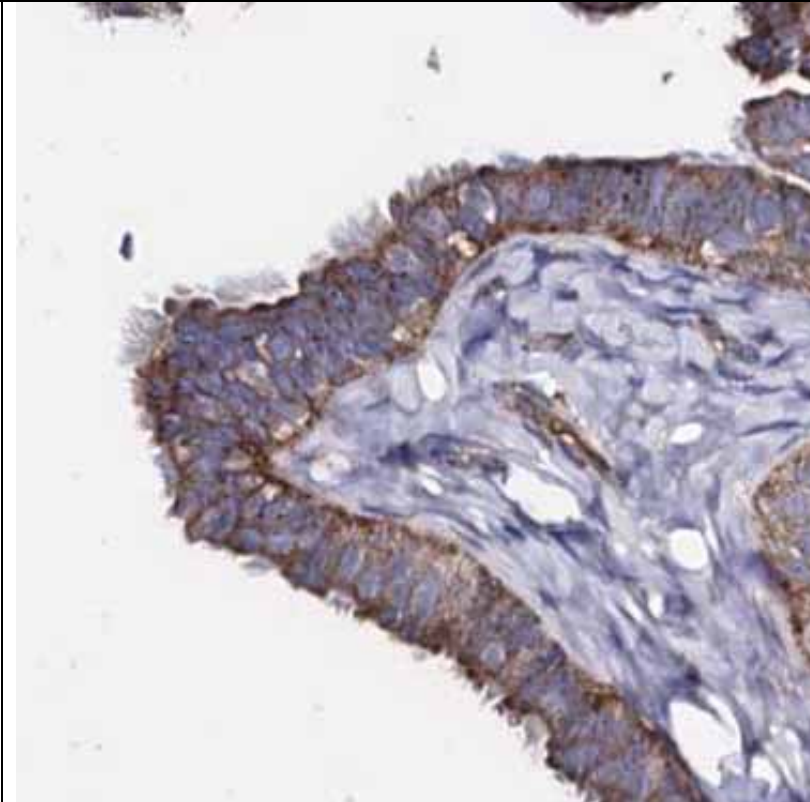

Staining is  
non-specific  
to ciliated  
cells or  
absent

KIF21A  
(antibody  
CAB022079)

Category 1

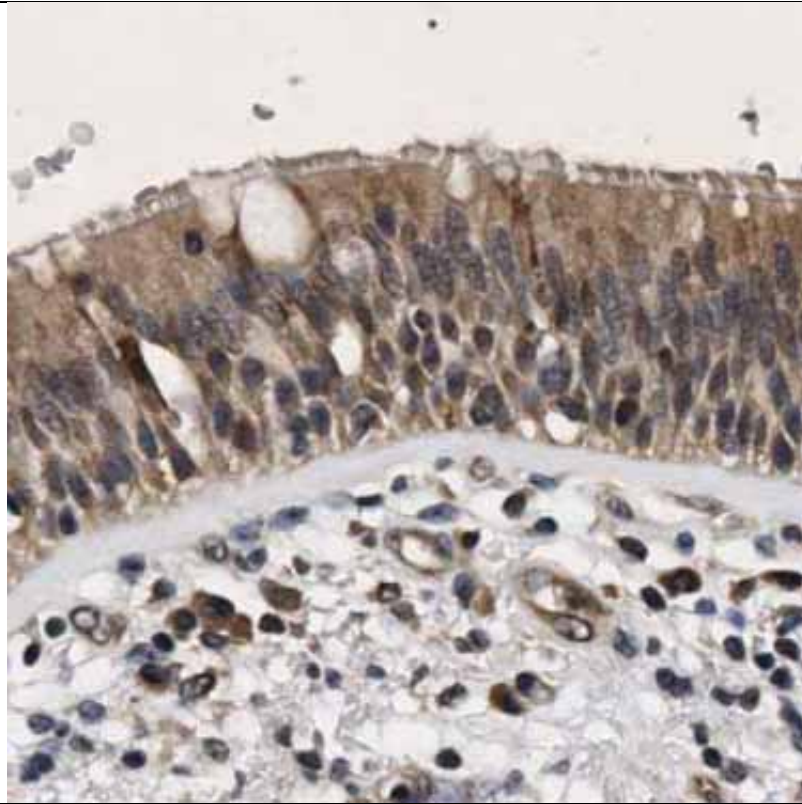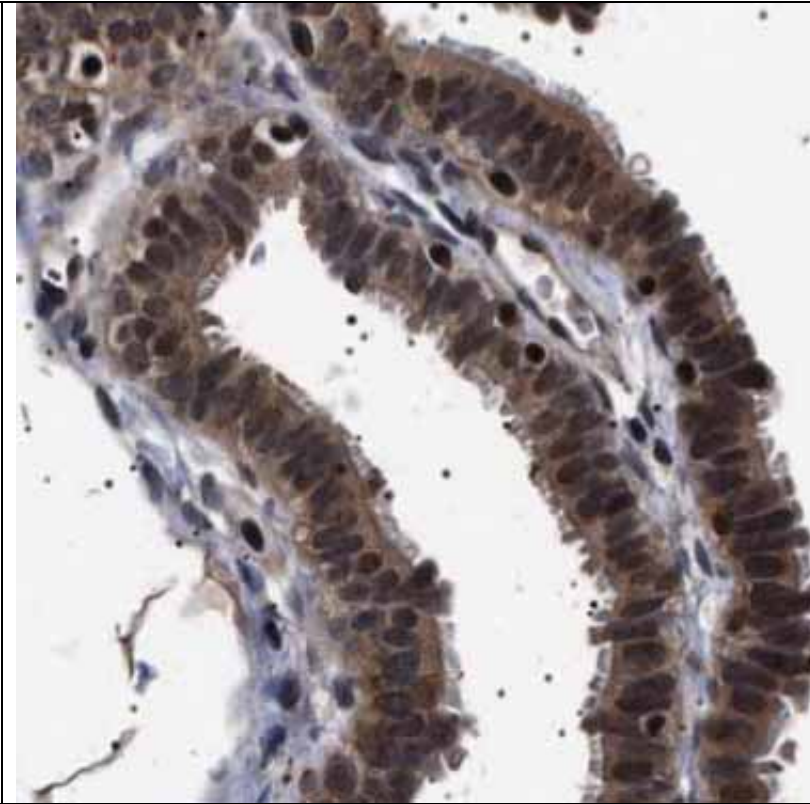

Staining is  
non-specific  
to ciliated  
cells or  
absent

LRRC46  
(antibody  
HPA021882)

Category 1

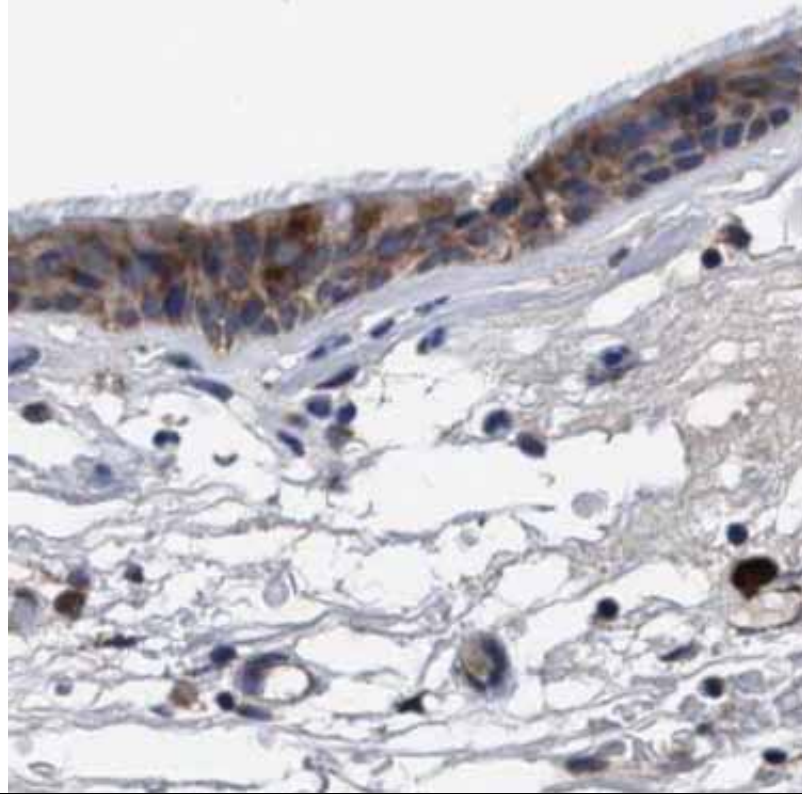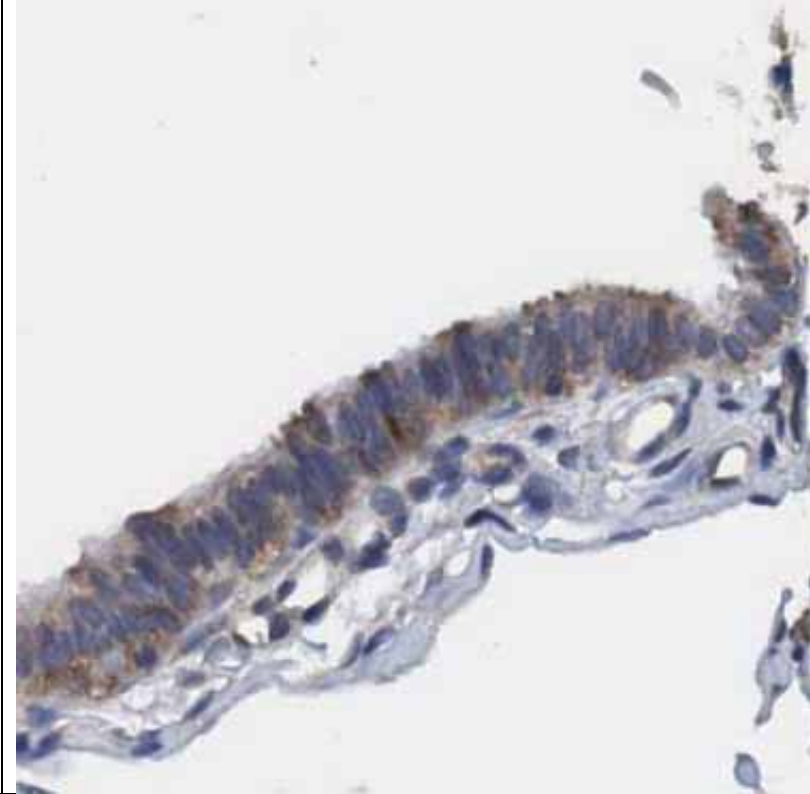

Staining is  
non-specific  
to ciliated  
cells or  
absent

MYB  
(antibody  
CAB017704)

Category 1

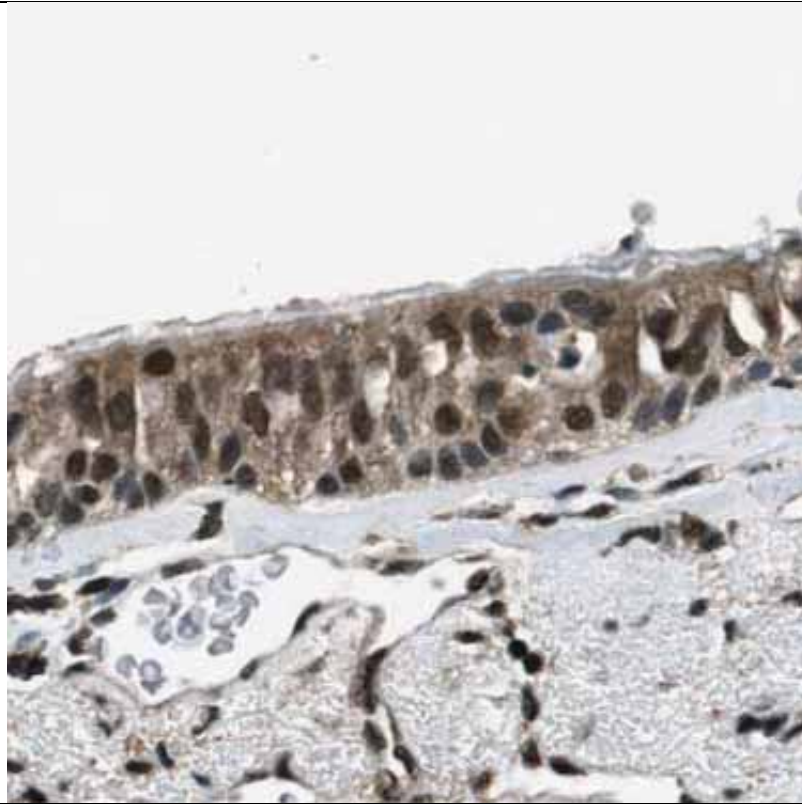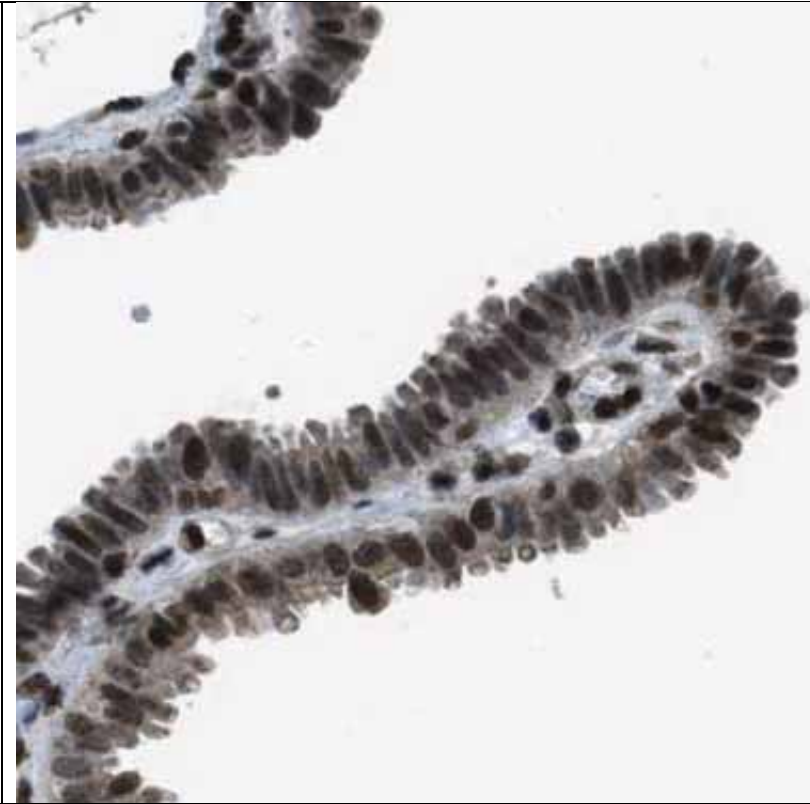

Staining is  
non-specific  
to ciliated  
cells or  
absent

NME7  
(antibody  
HPA038014)

Category 1

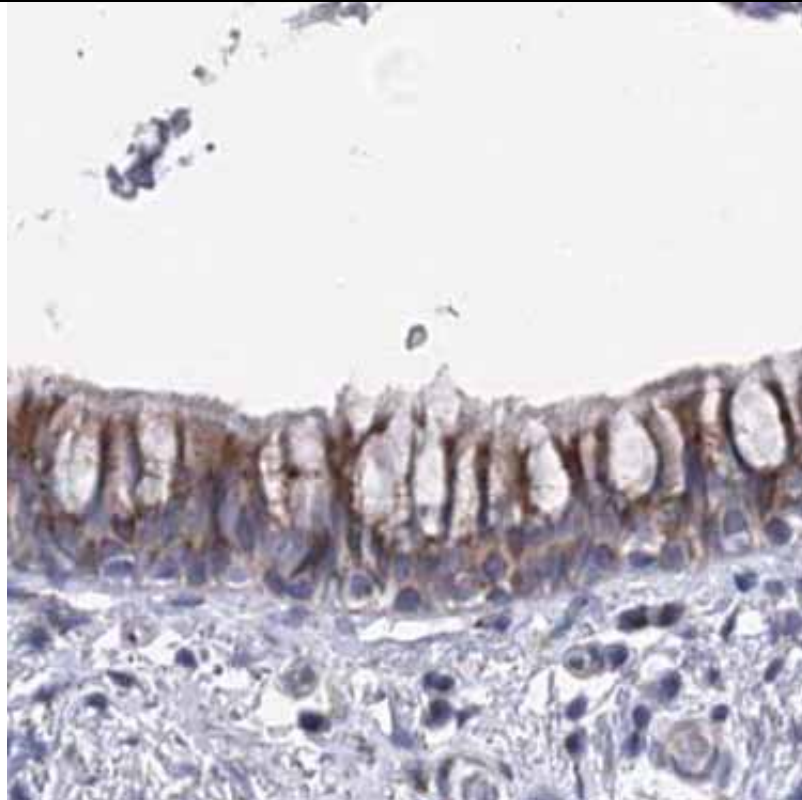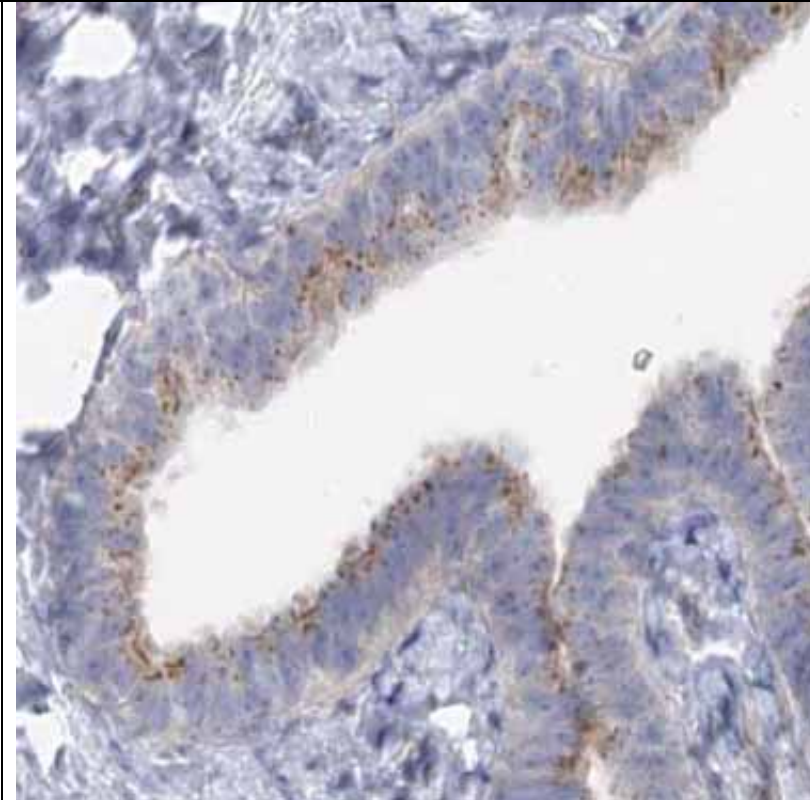

Staining is  
non-specific  
to ciliated  
cells or  
absent

NSUN7  
(antibody  
HPA020653)

Category 1

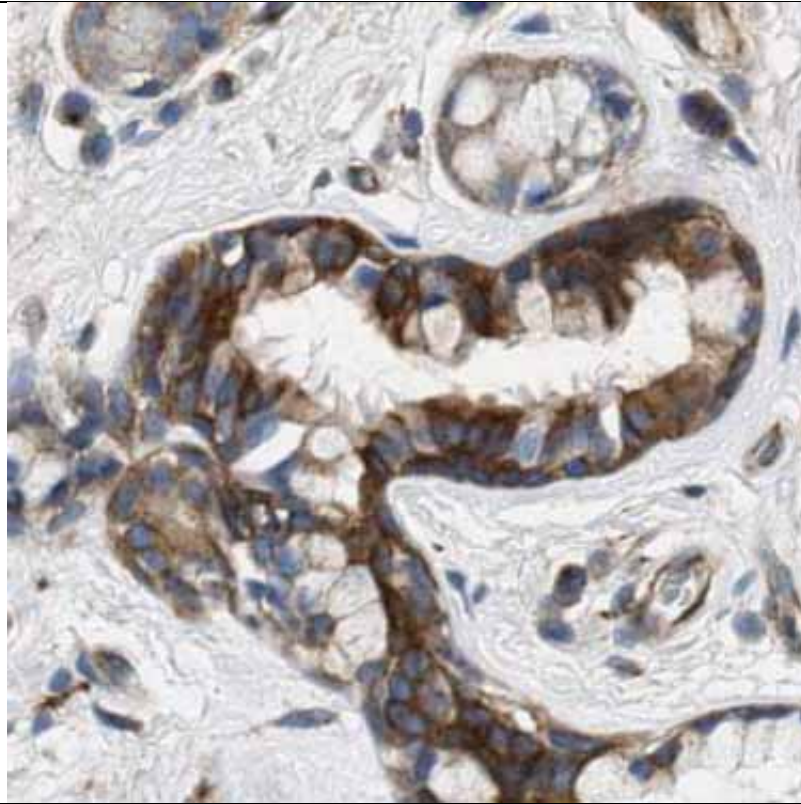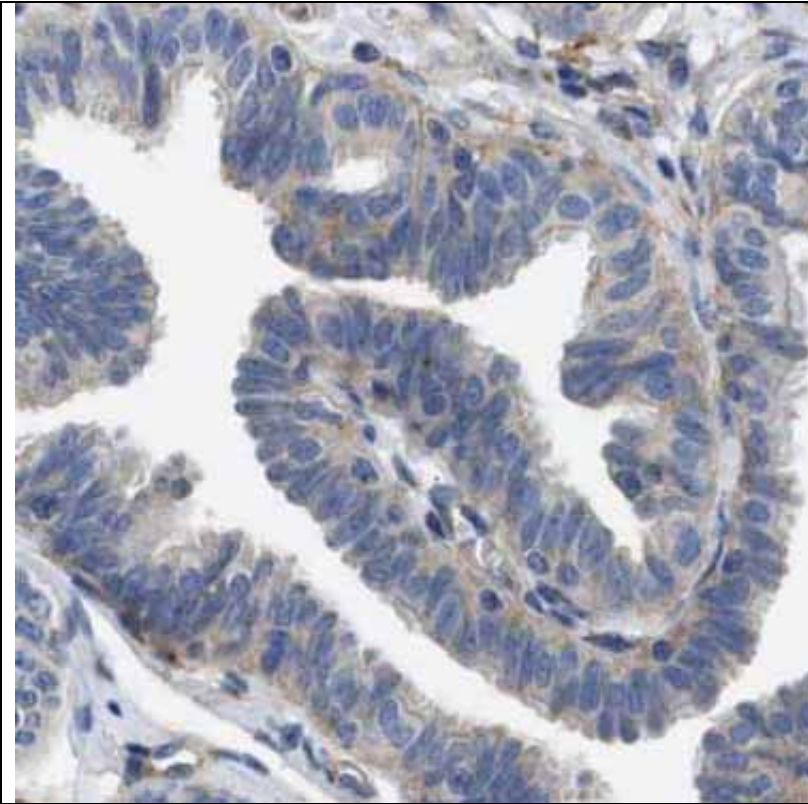

Staining is  
non-specific  
to ciliated  
cells or  
absent

PECR  
(antibody  
HPA021593)

Category 1

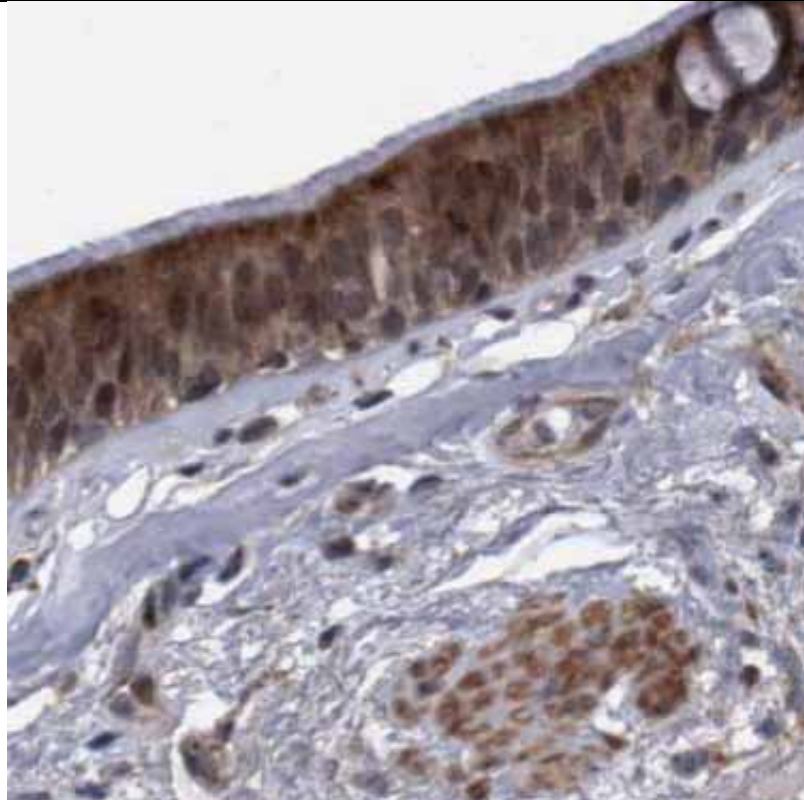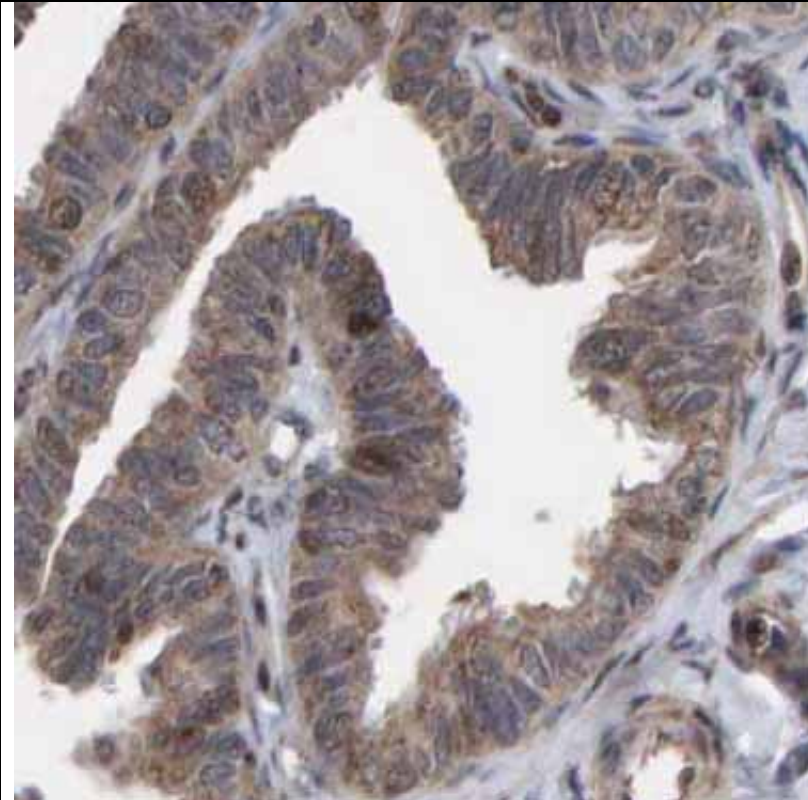

Staining is  
non-specific  
to ciliated  
cells or  
absent

PTPRT  
(antibody  
HPA017336)

Category 1

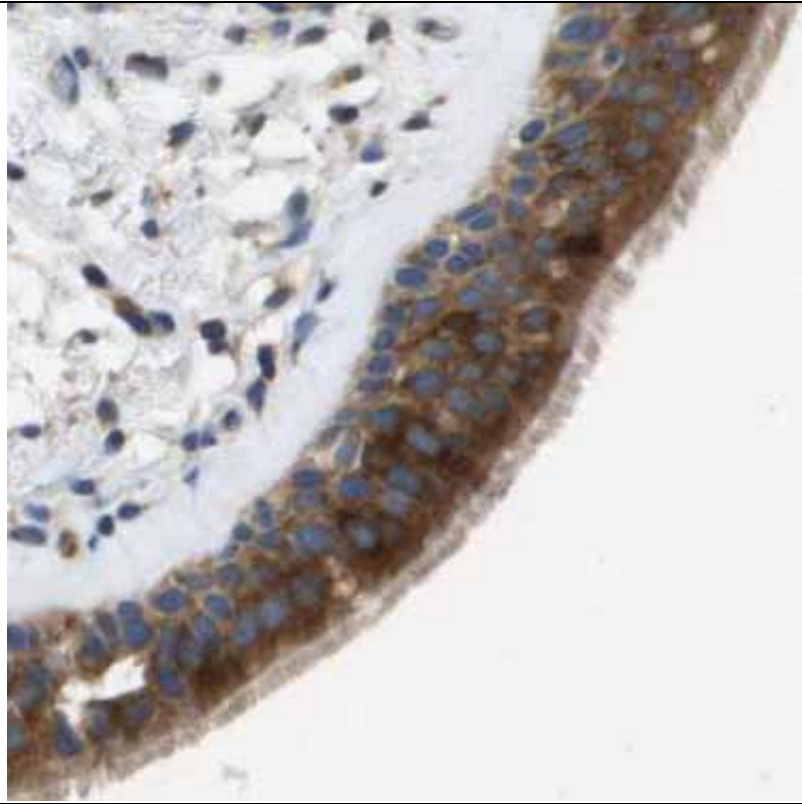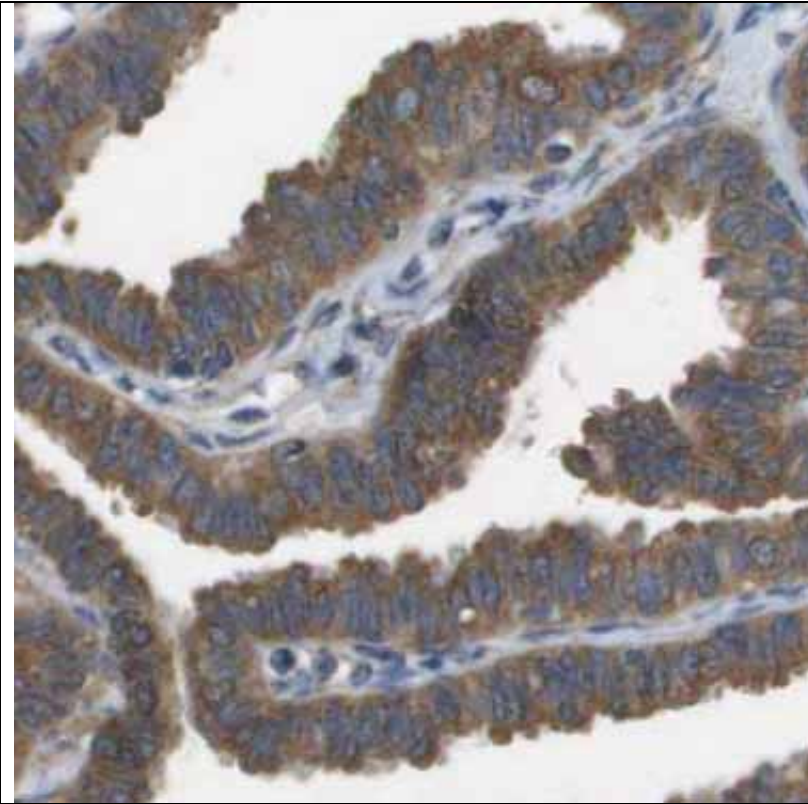

Staining is  
non-specific  
to ciliated  
cells or  
absent

RAGE  
(antibody  
HPA027282)

Category 1

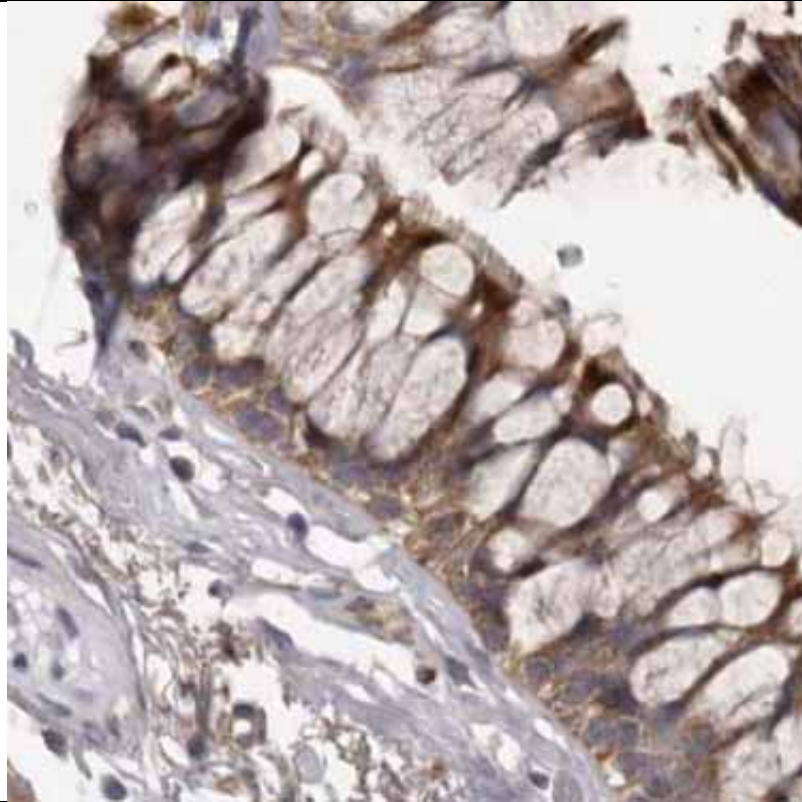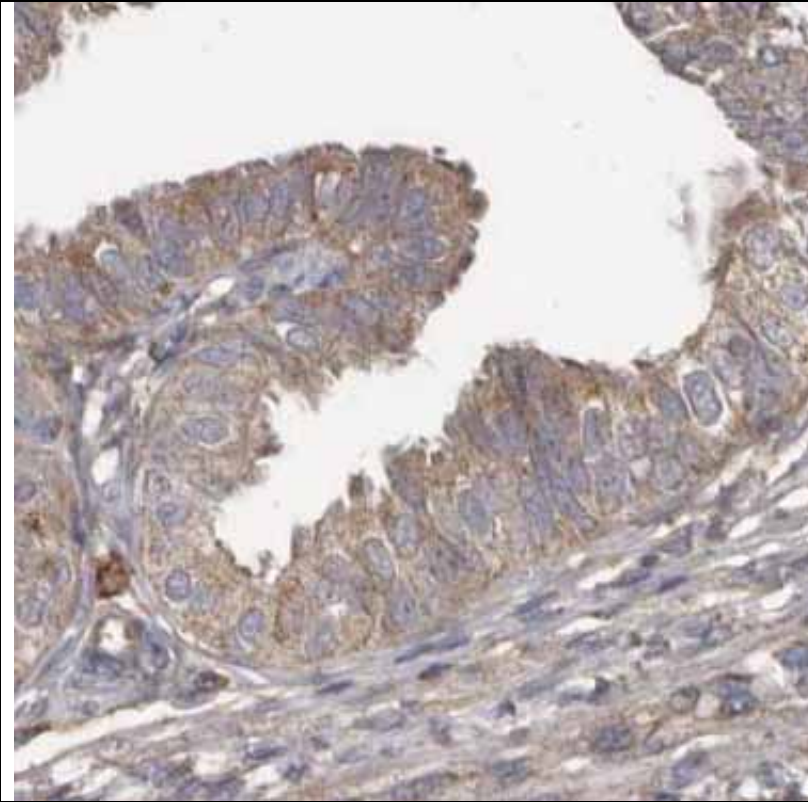

Staining is  
non-specific  
to ciliated  
cells or  
absent

RIBC1  
(antibody  
HPA021613)  
Category 1

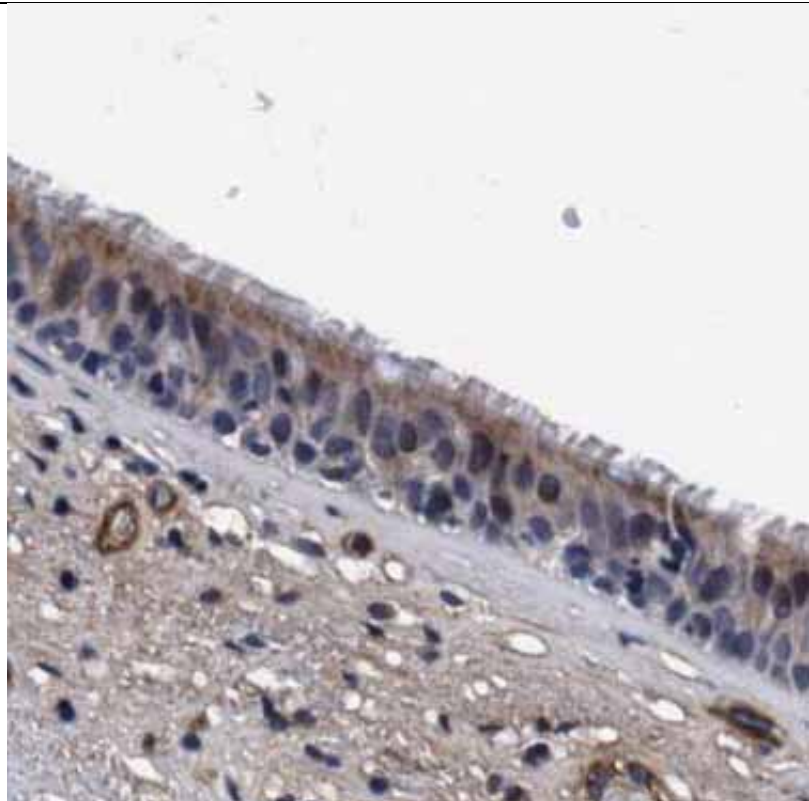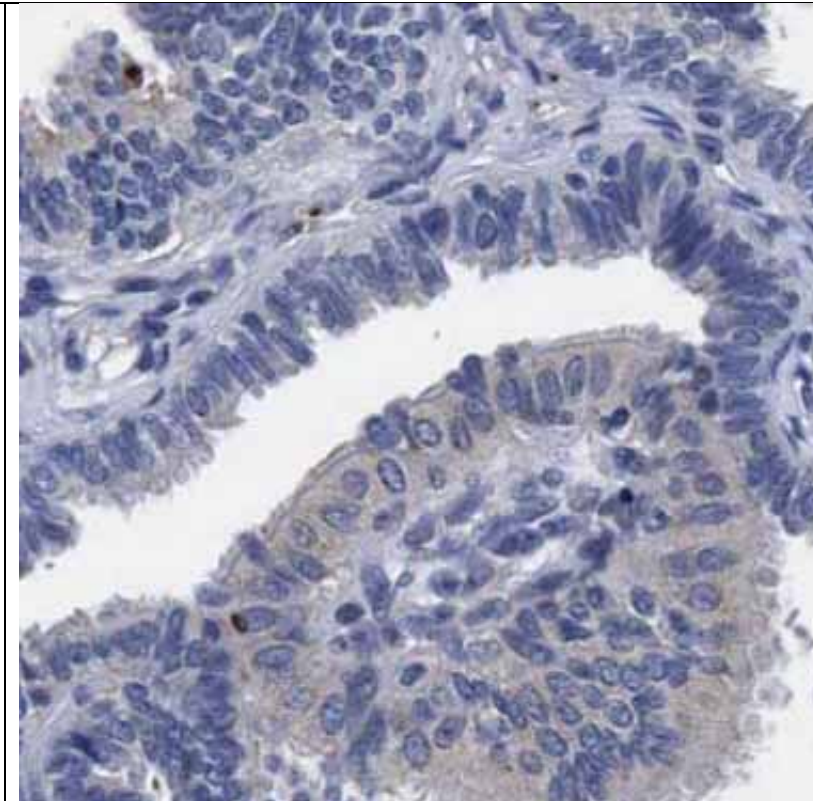

Staining is  
non-specific  
to ciliated  
cells or  
absent

SERPINI2  
(antibody  
HPA030613)  
Category 1

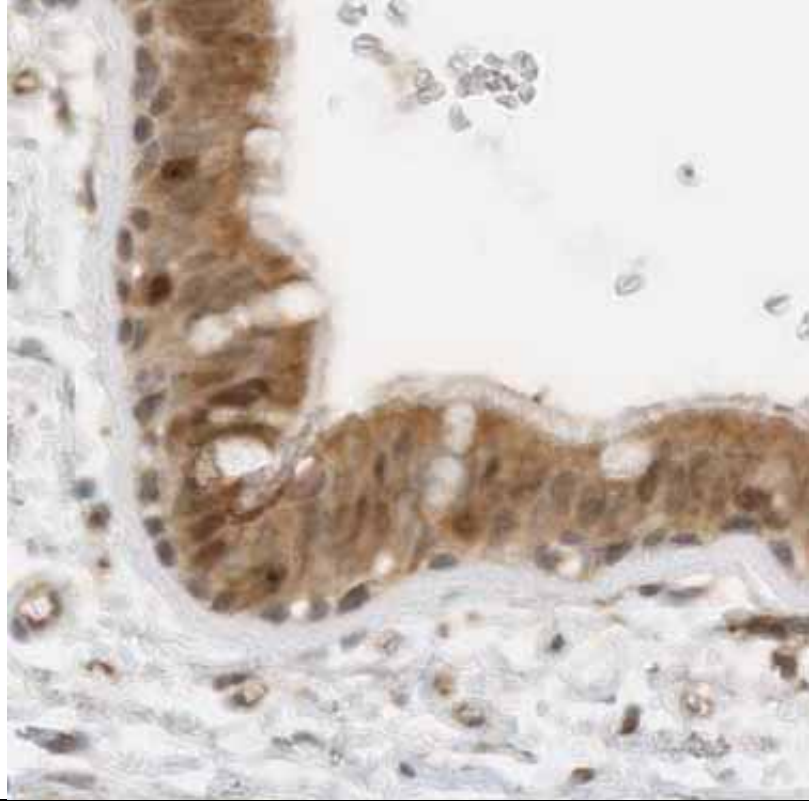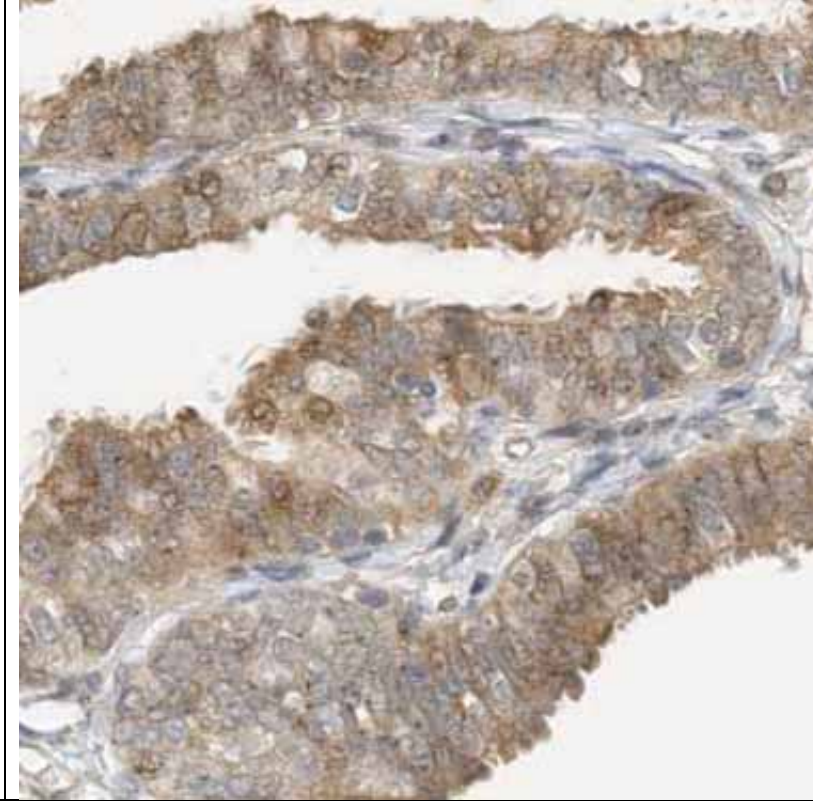

Staining is  
non-specific  
to ciliated  
cells or  
absent



TMEM190  
(antibody  
HPA026899)

Category 1

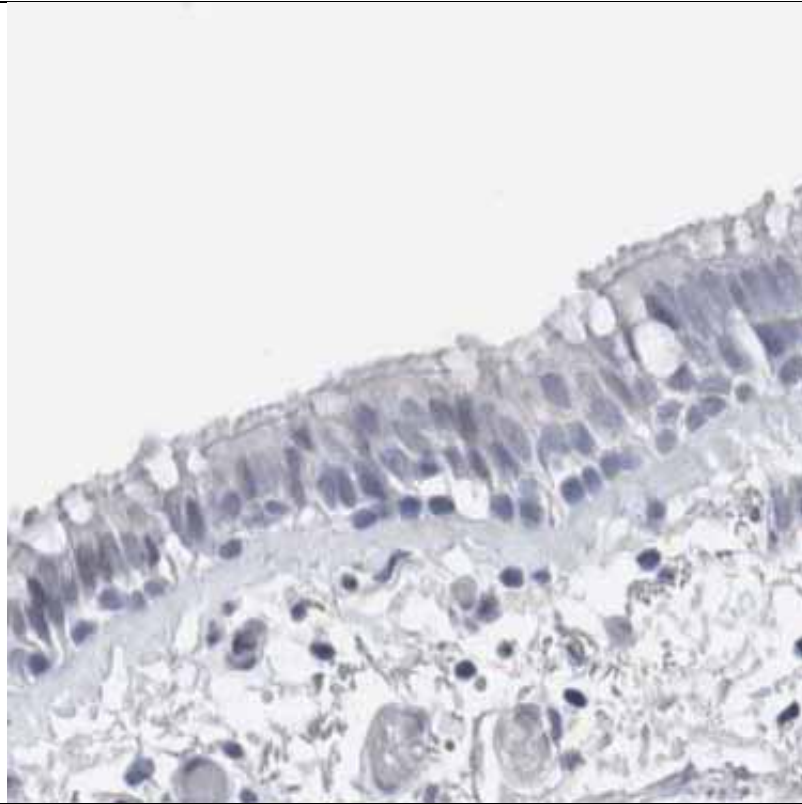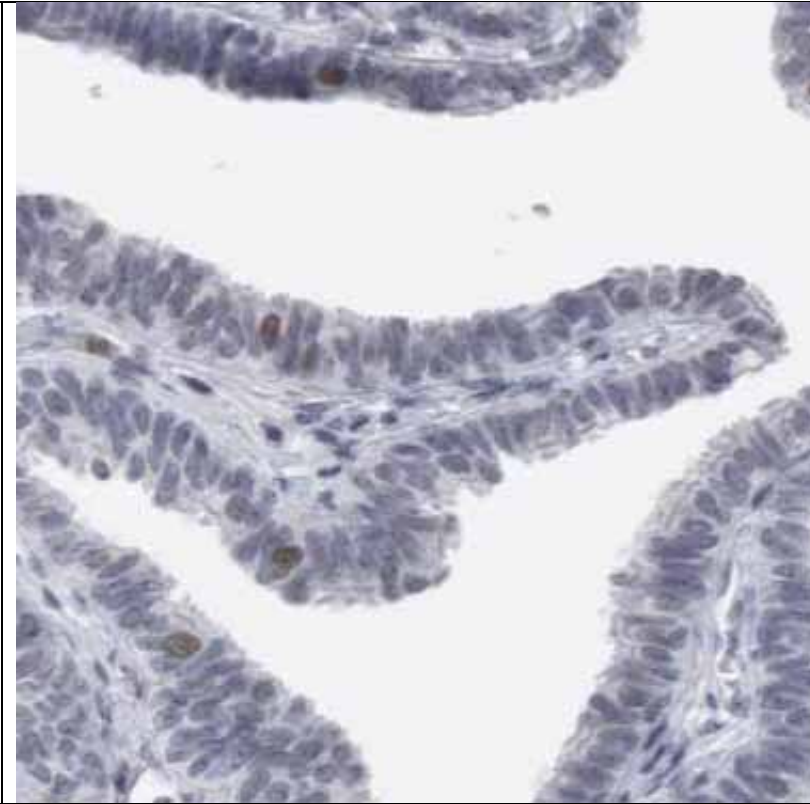

Staining is  
non-specific  
to ciliated  
cells or  
absent

TTC21A  
(antibody  
HPA035511)

Category 1

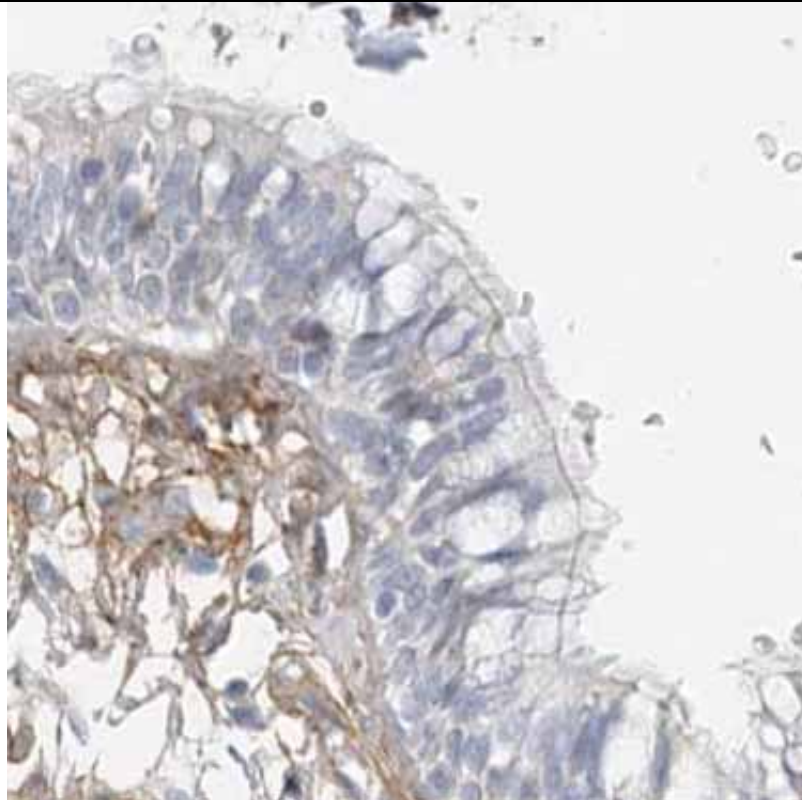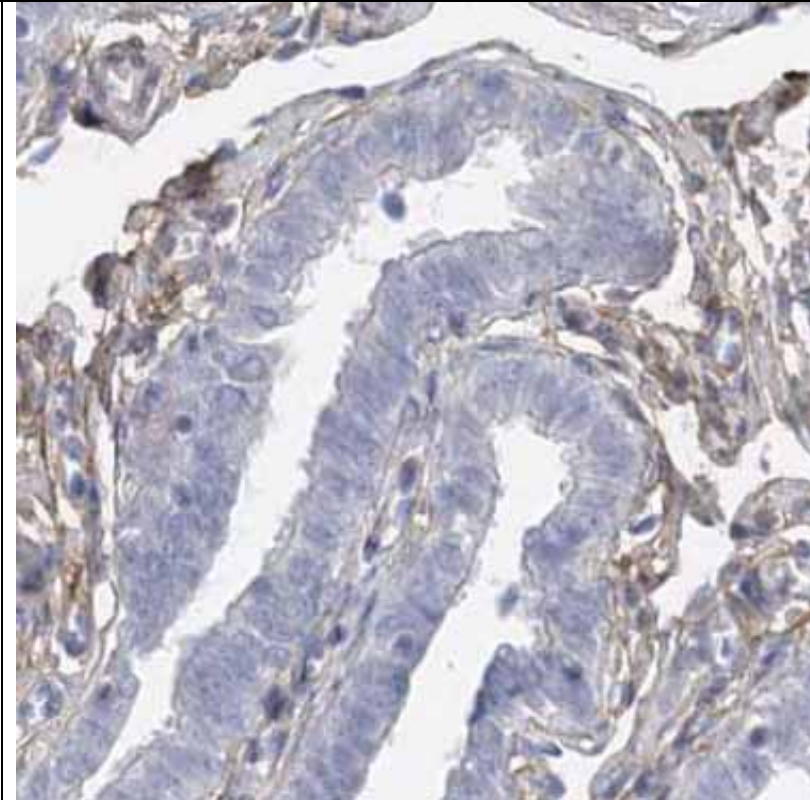

Staining is  
non-specific  
to ciliated  
cells or  
absent

WDR63  
(antibody  
HPA038066)

Category 1

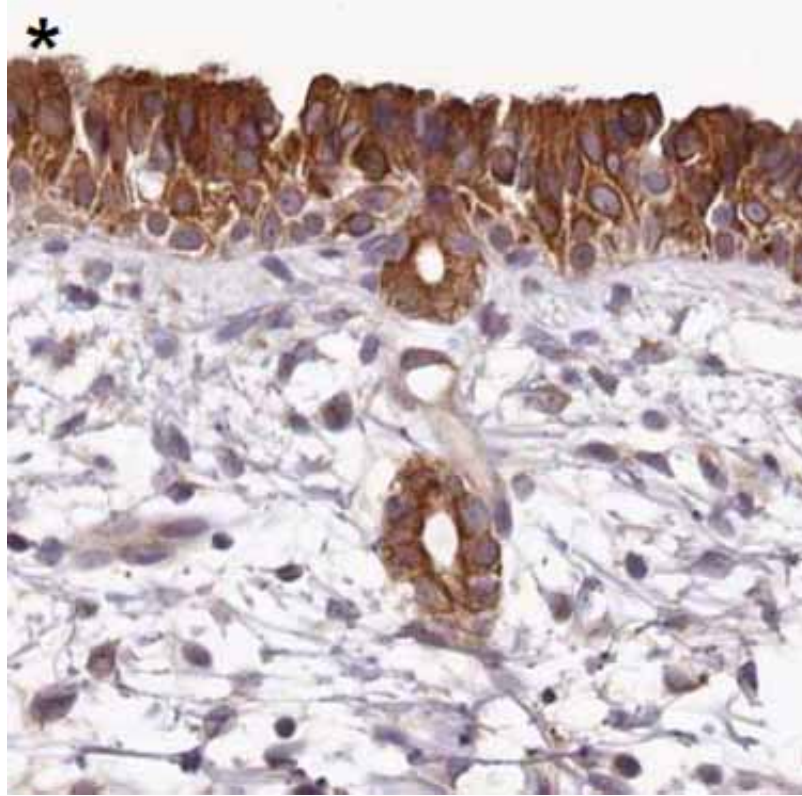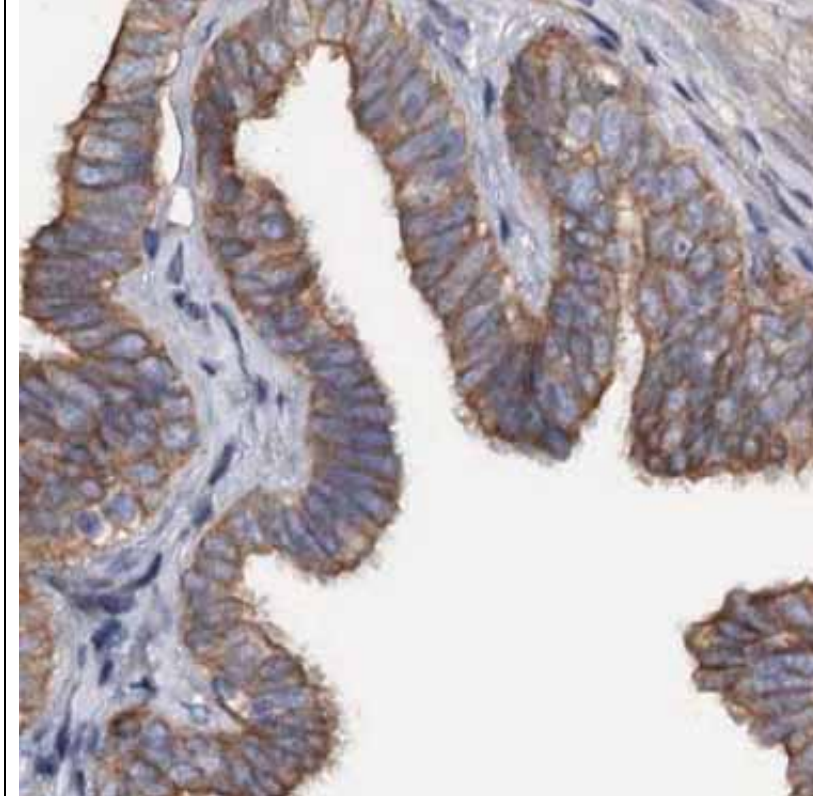

Staining is  
non-specific  
to ciliated  
cells or  
absent

ZMYND10  
(antibody  
HPA035255)

Category 1

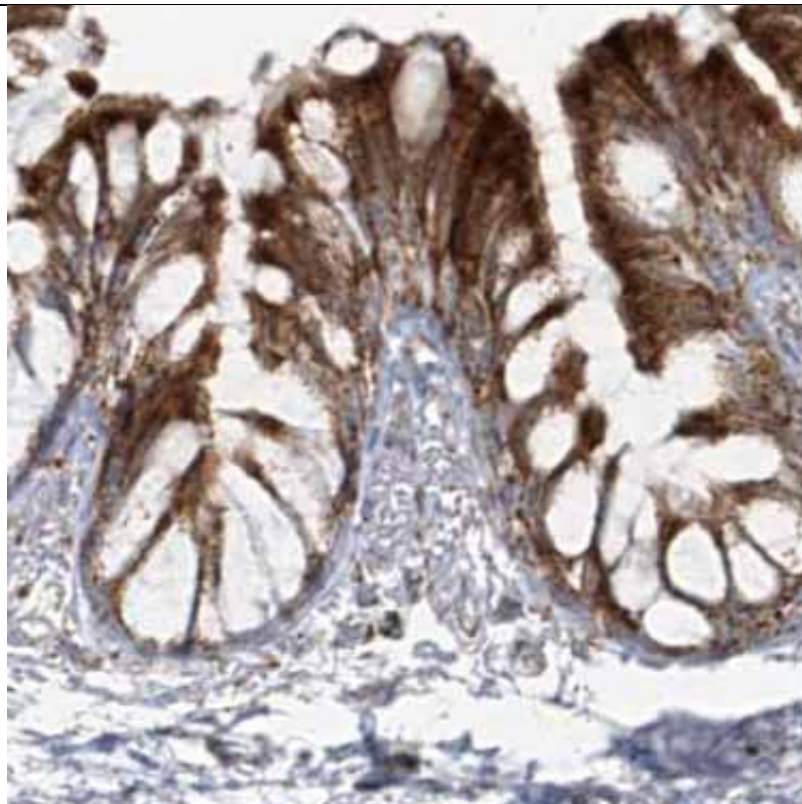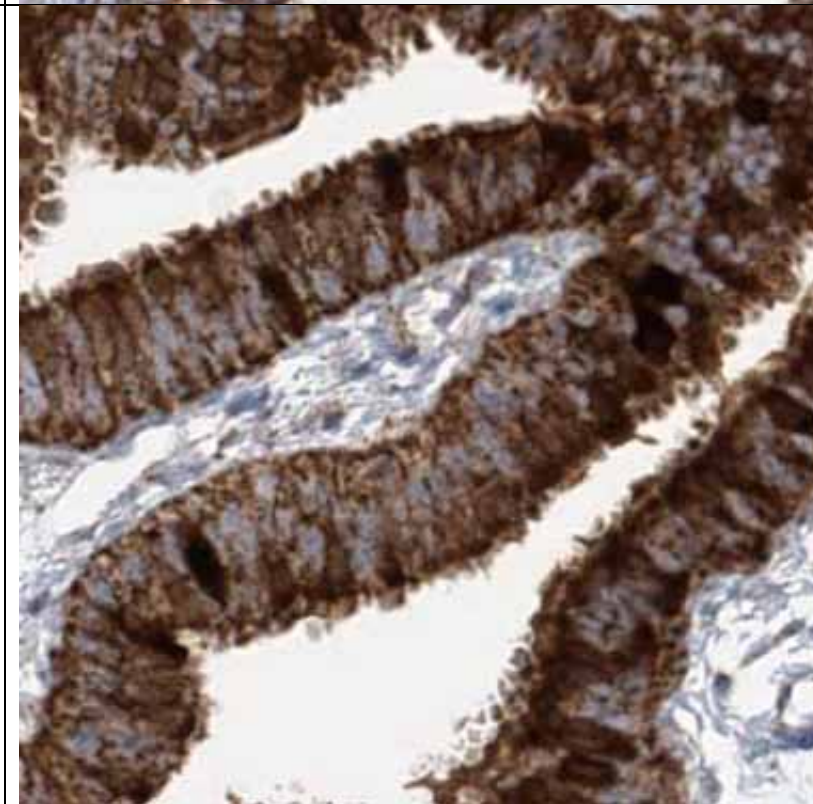

Staining is  
non-specific  
to ciliated  
cells or  
absent

## **Category 2**

(genes with weak evidence  
for ciliary function from the *literature*)

Coverage: 34 proteins were available in Protein Atlas  
from the total of 60 proteins in the category

| Protein                                                        | Airways                                                                             | Fallopian tubes                                                                      | Summary                                             |
|----------------------------------------------------------------|-------------------------------------------------------------------------------------|--------------------------------------------------------------------------------------|-----------------------------------------------------|
| <p>C1orf87<br/>(antibody<br/>HPA031368)</p> <p>Category 2</p>  | 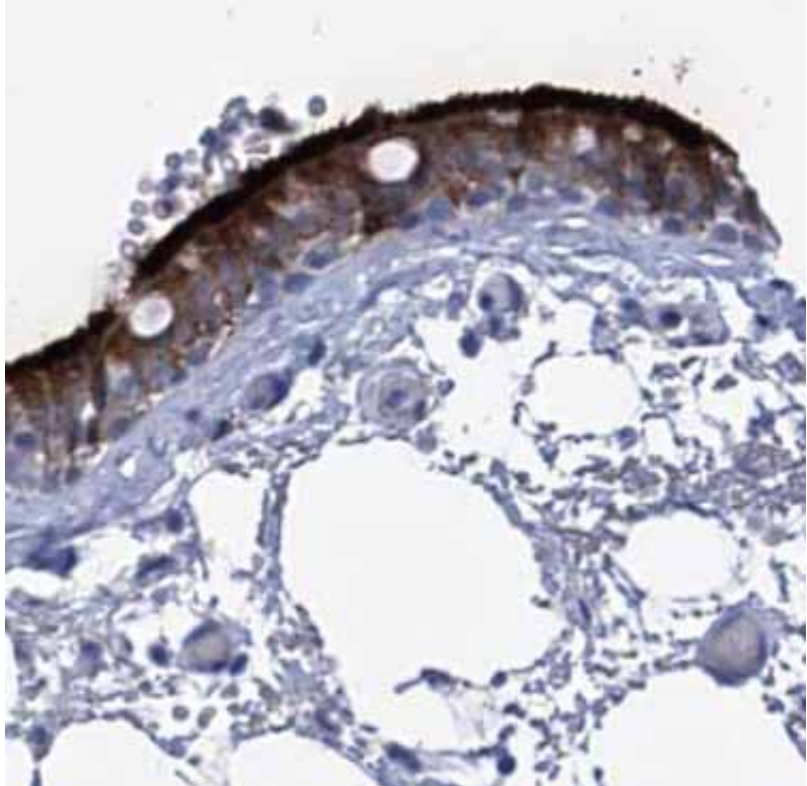  |   | <p>Staining is<br/>specific to<br/><i>cilia</i></p> |
| <p>C1orf222<br/>(antibody<br/>HPA029274)</p> <p>Category 2</p> |  |  | <p>Staining is<br/>specific to<br/><i>cilia</i></p> |

C11orf66  
(antibody  
HPA039068)

Category 2

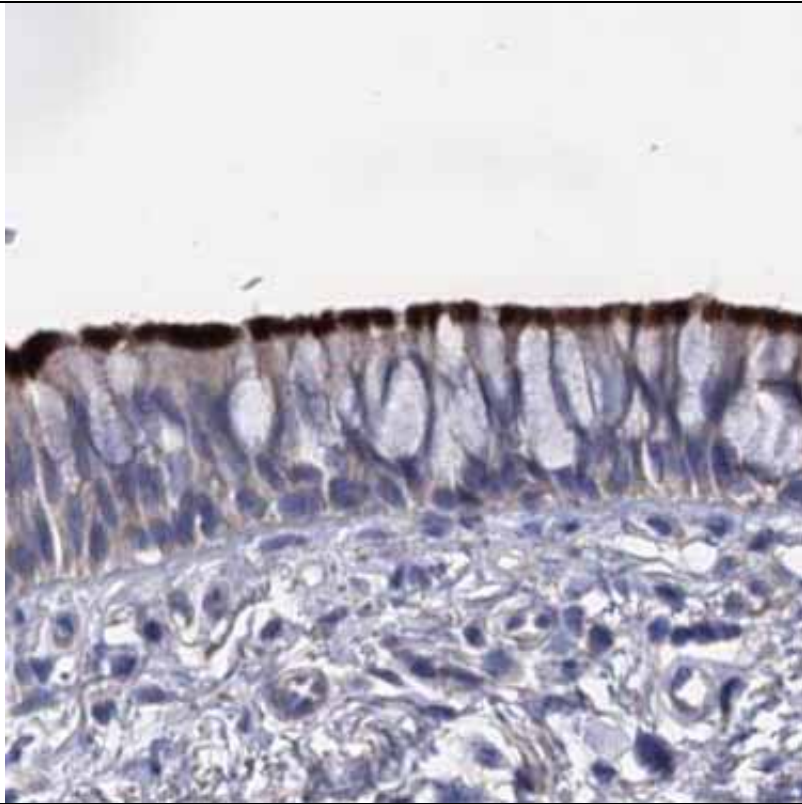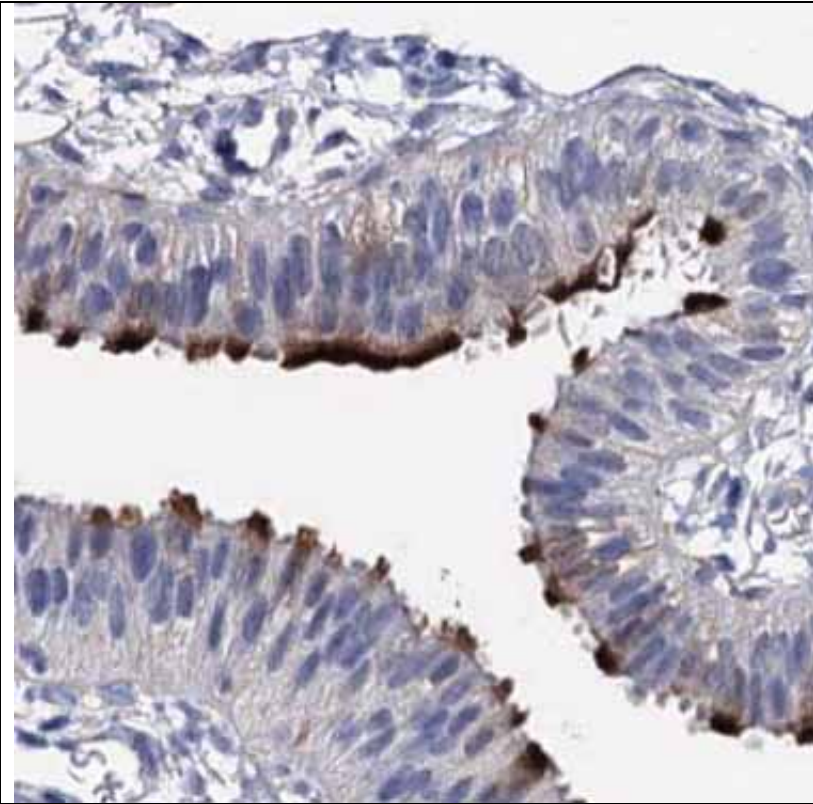

Staining is  
specific to  
*cilia*

C14orf179  
(antibody  
HPA003438)

Category 2

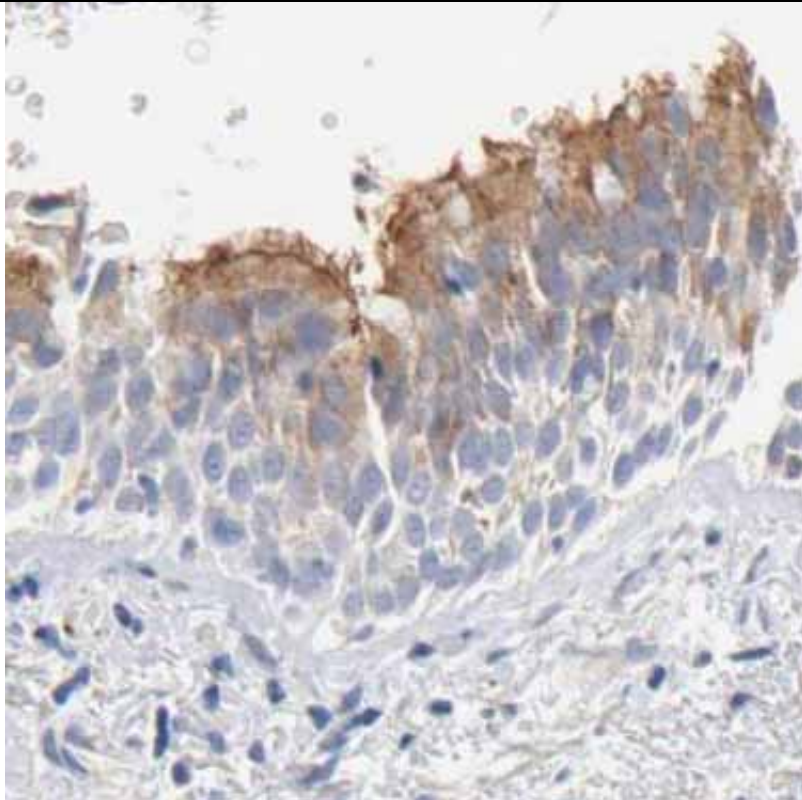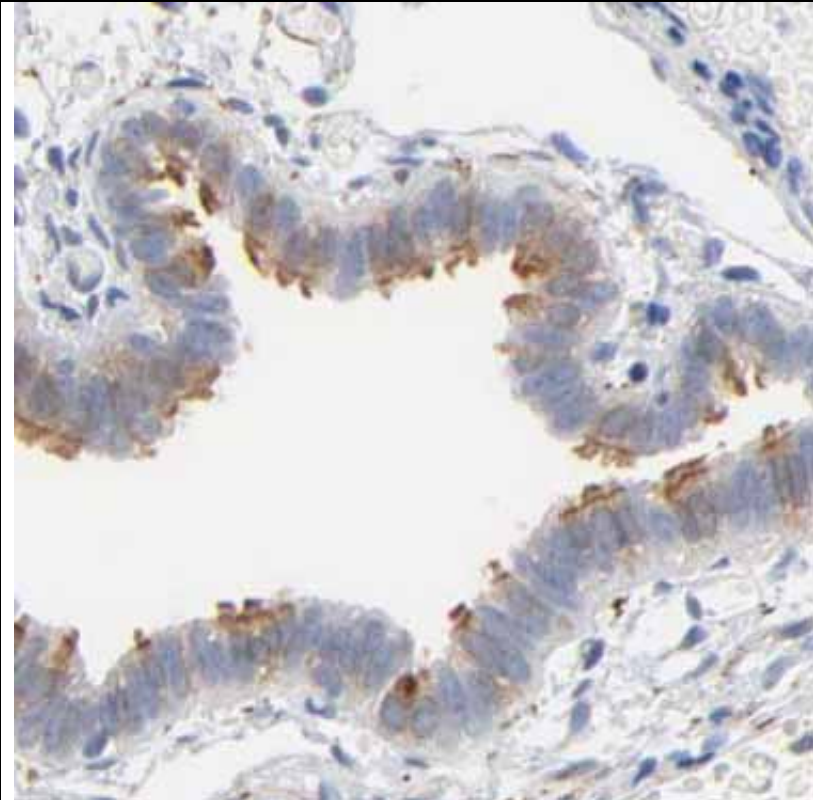

Staining is  
specific to  
*cilia*

C9orf9  
(antibody  
HPA022243)

Category 2

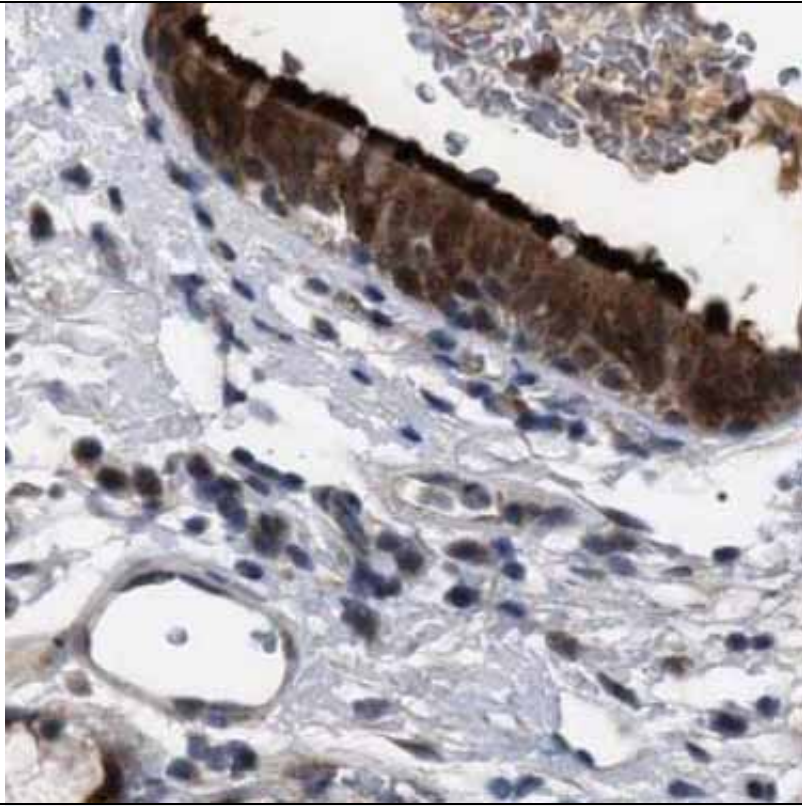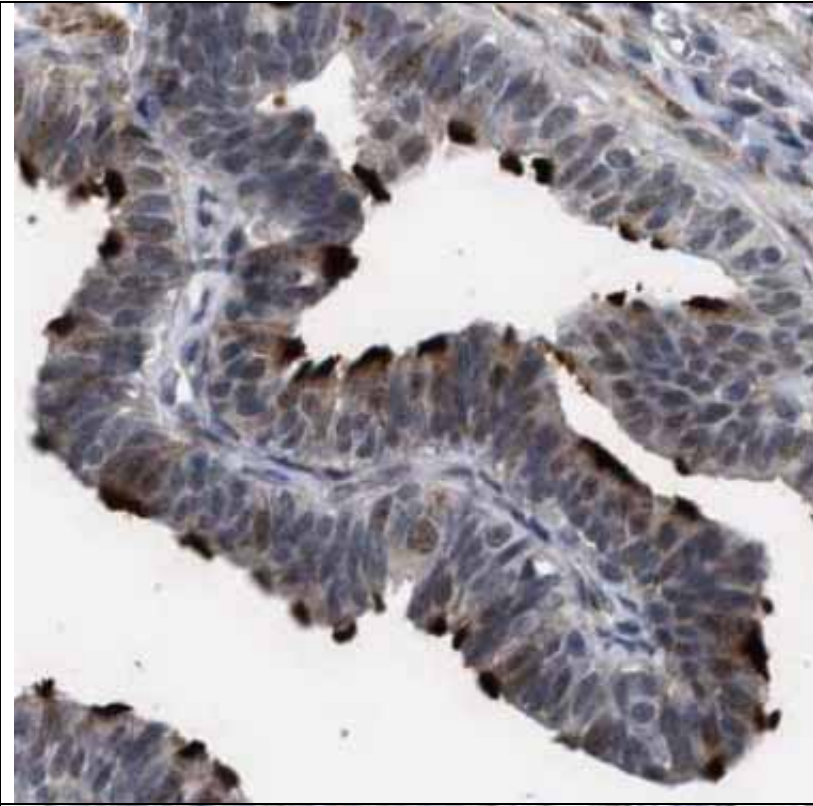

Staining is  
specific to  
*cilia*

DZIP3  
(antibody  
HPA035066)

Category 2

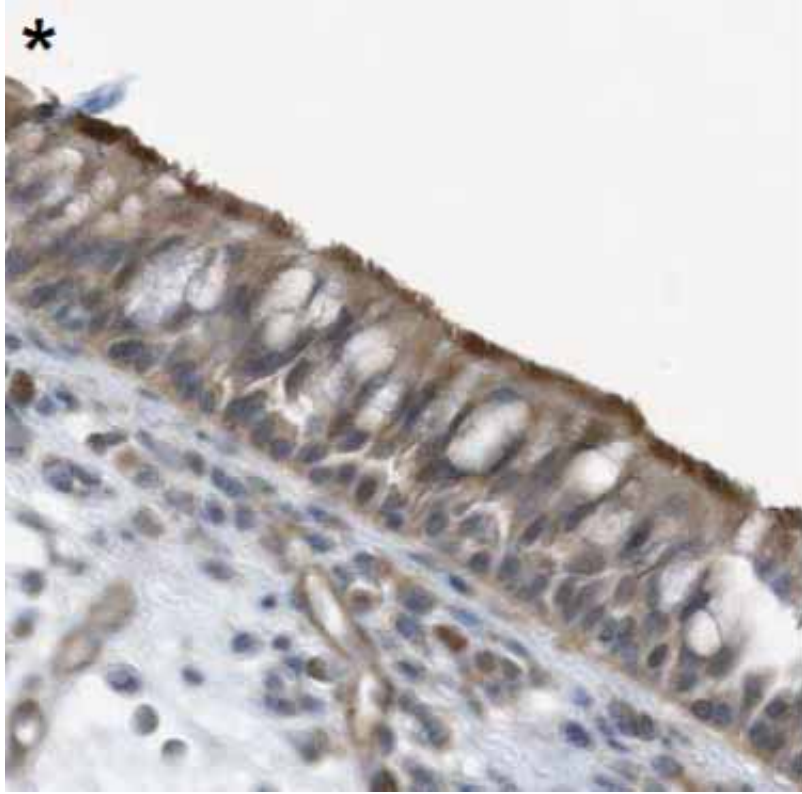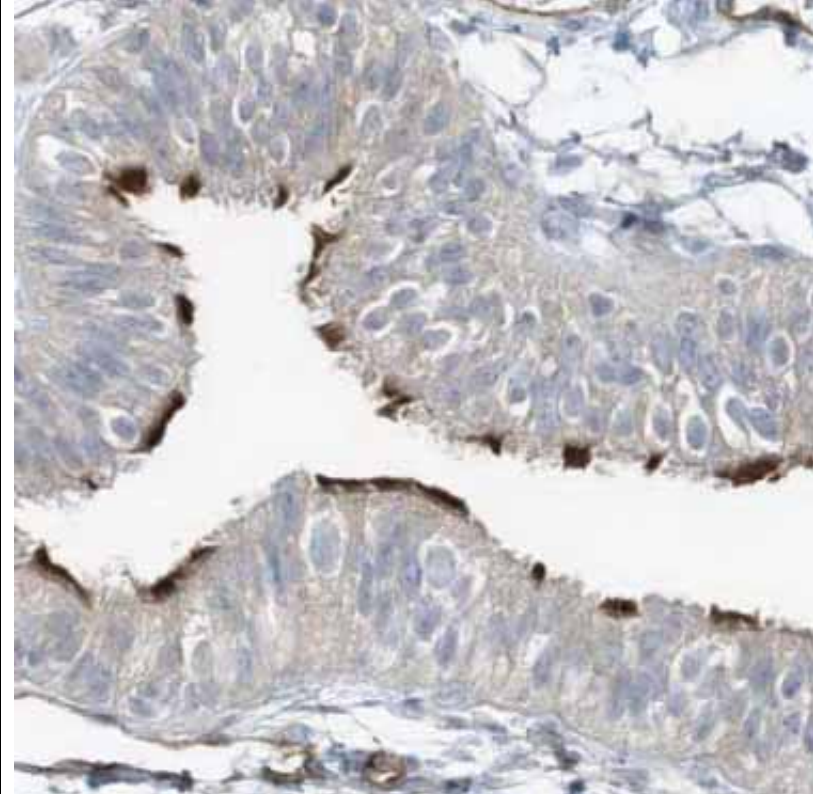

Staining is  
specific to  
*cilia*

FSD1L  
(antibody  
HPA035138)

Category 2

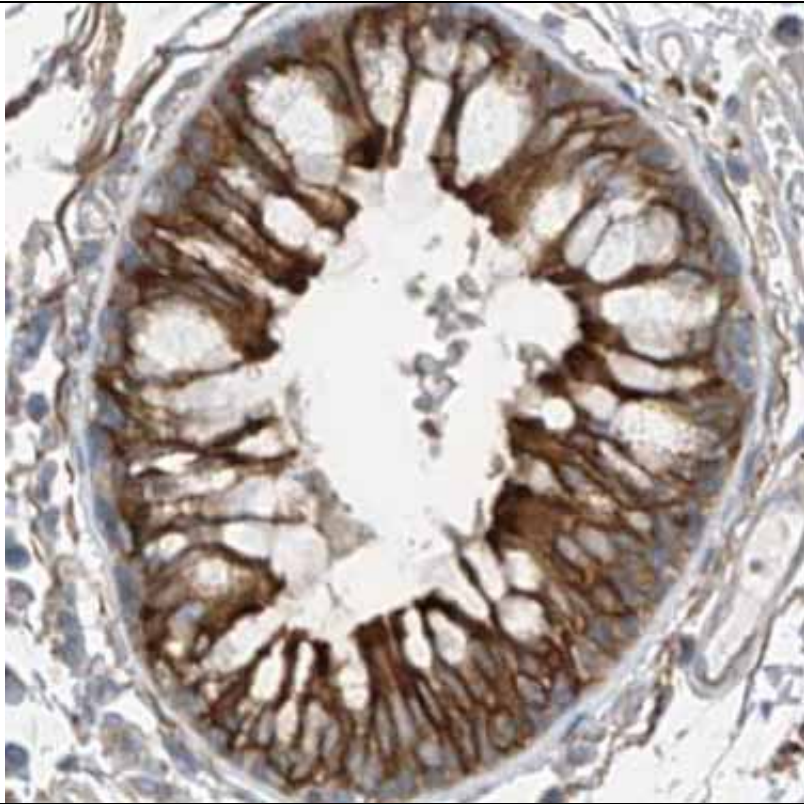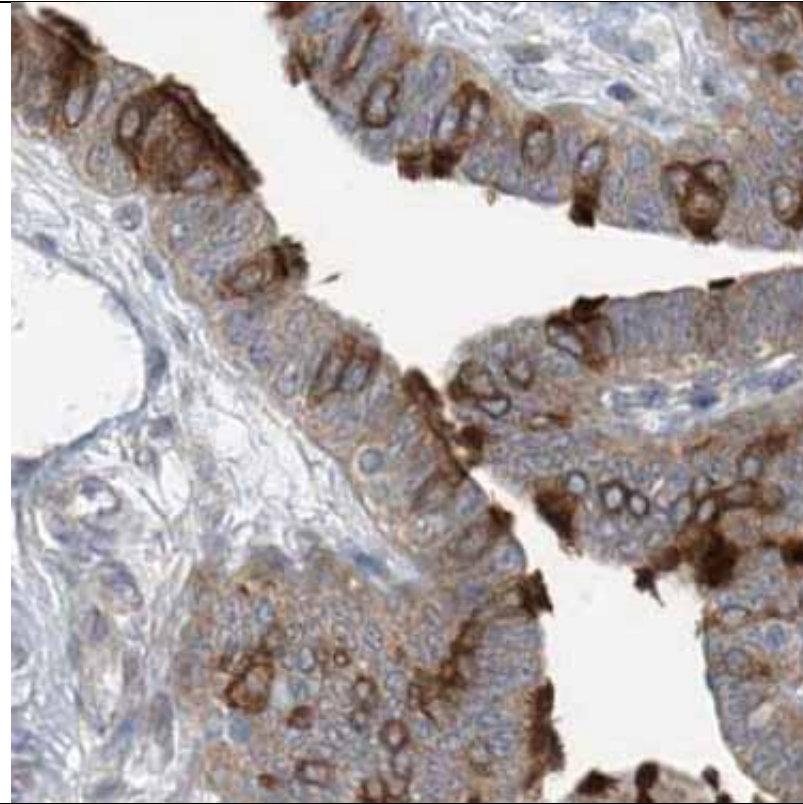

Staining is  
specific to  
*cilia*

KCNRG  
(antibody  
HPA001741)

Category 2

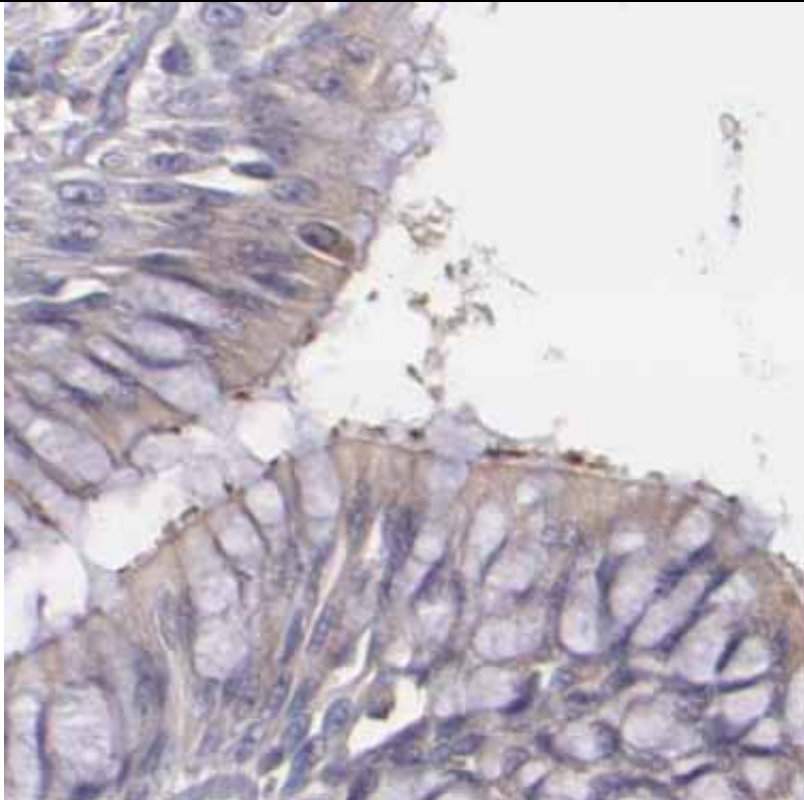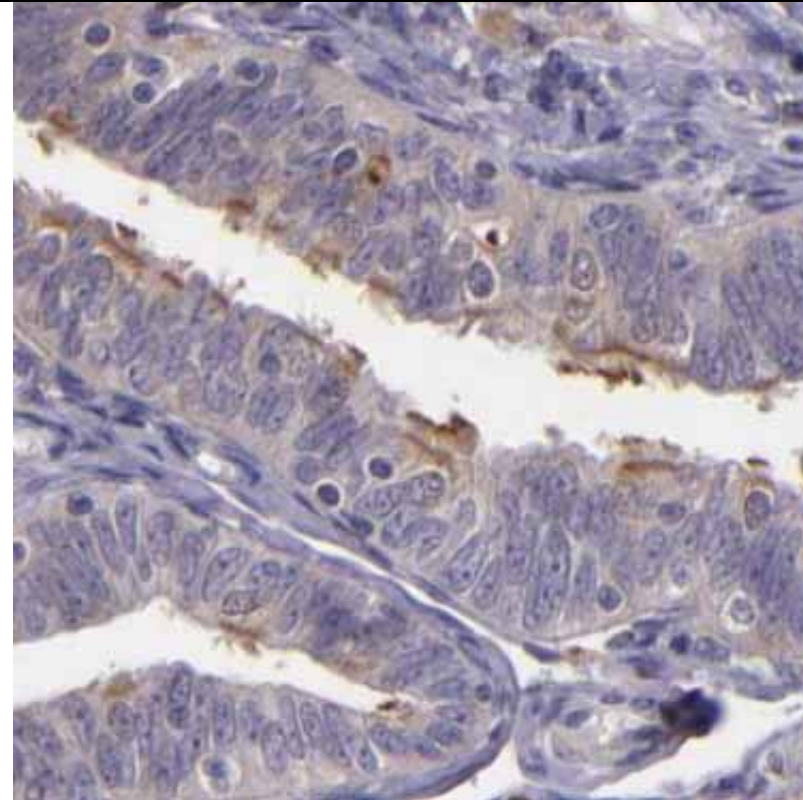

Staining is  
specific to  
*cilia*

LRP2BP  
(antibody  
HPA036665)

Category 2

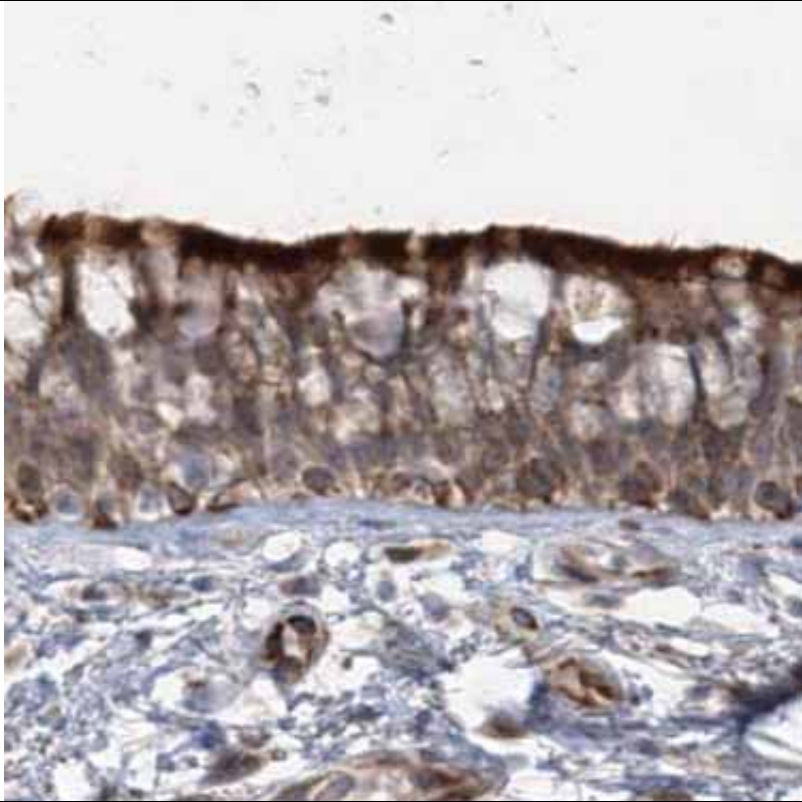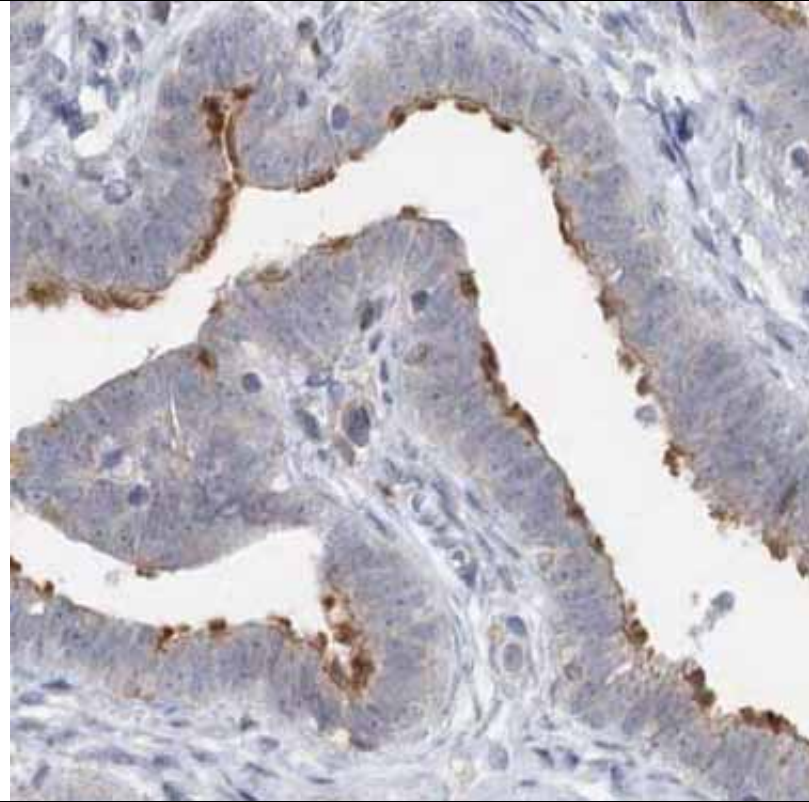

Staining is  
specific to  
*cilia*

MIPEP  
(antibody  
HPA031669)

Category 2

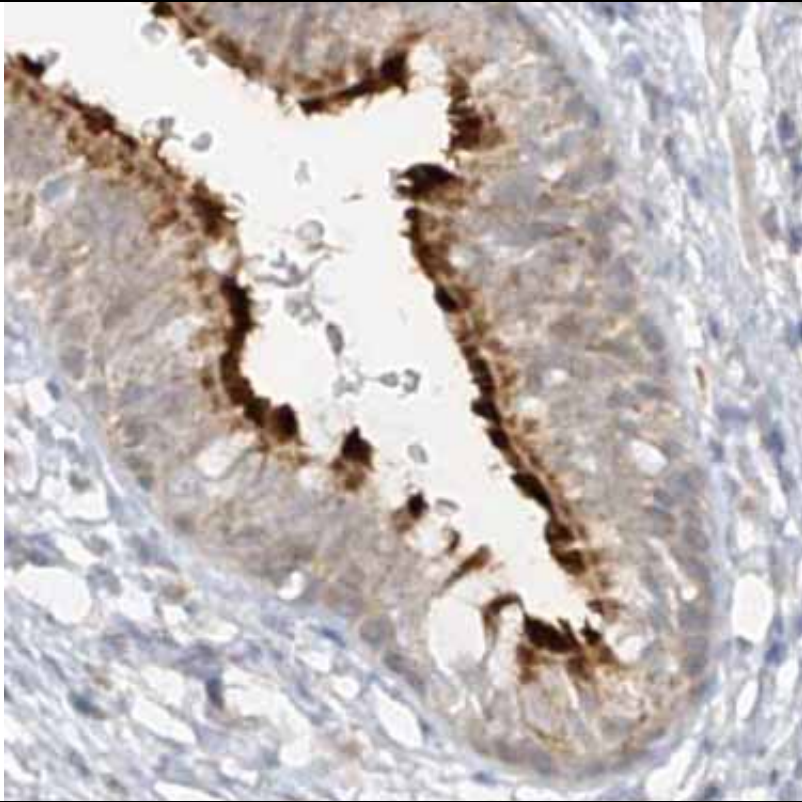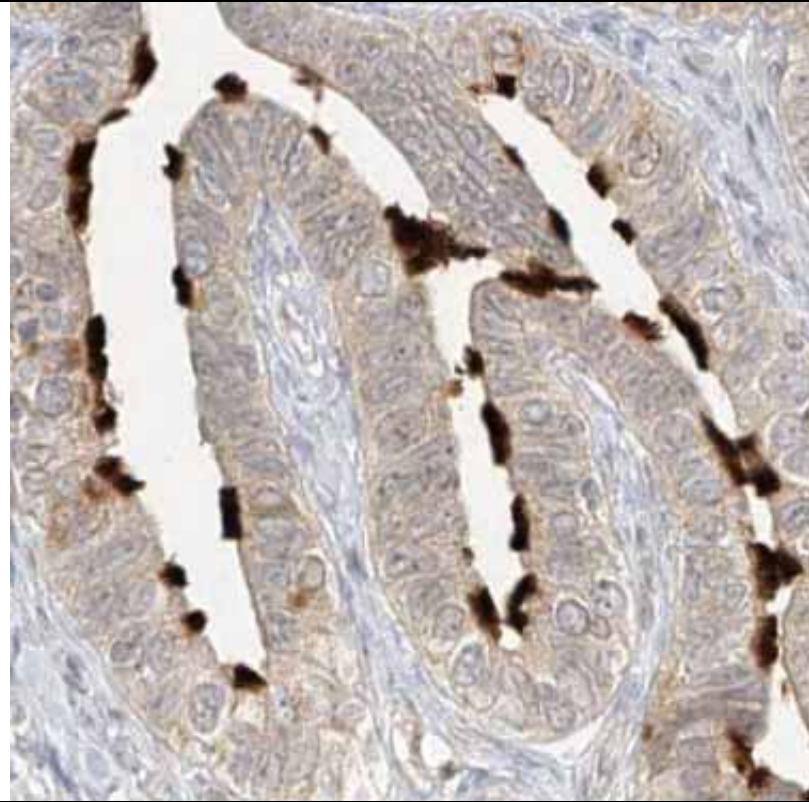

Staining is  
specific to  
*cilia*



PLCH1  
(antibody  
HPA036176)

Category 2

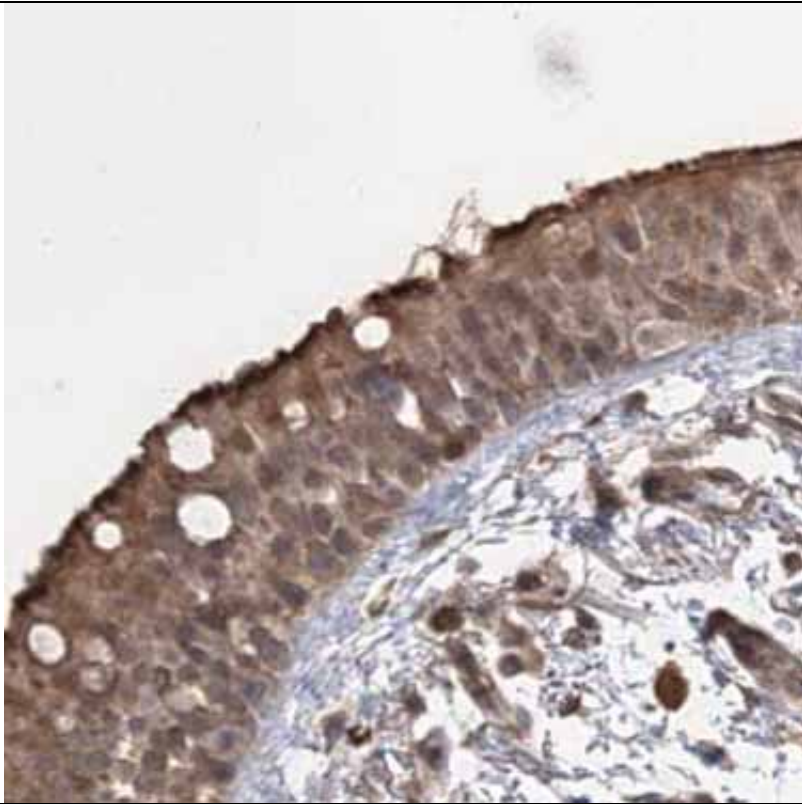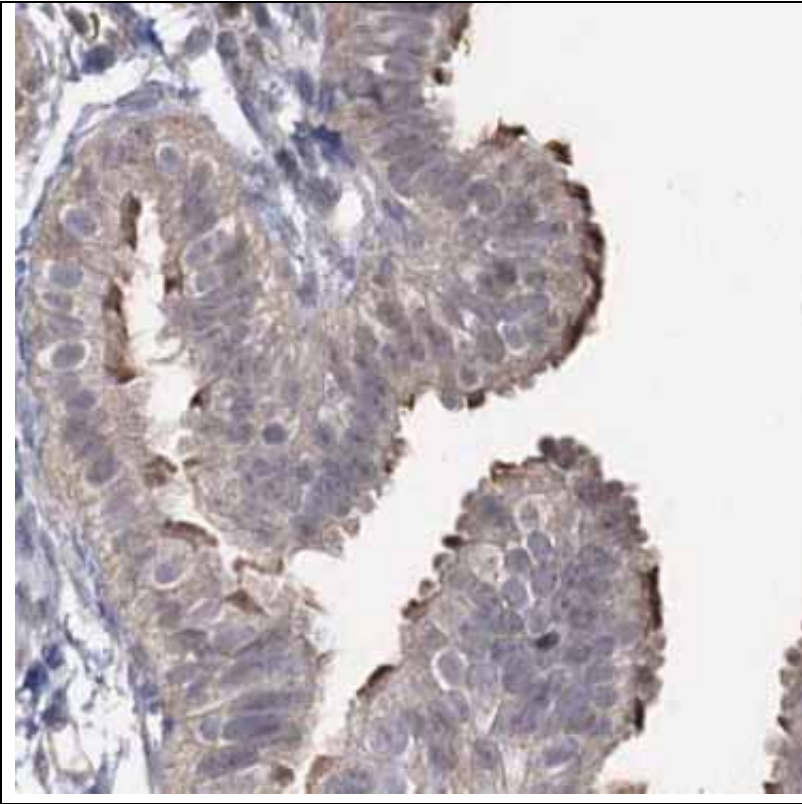

Staining is  
specific to  
*cilia*

SPAG17  
(antibody  
HPA028597)

Category 2

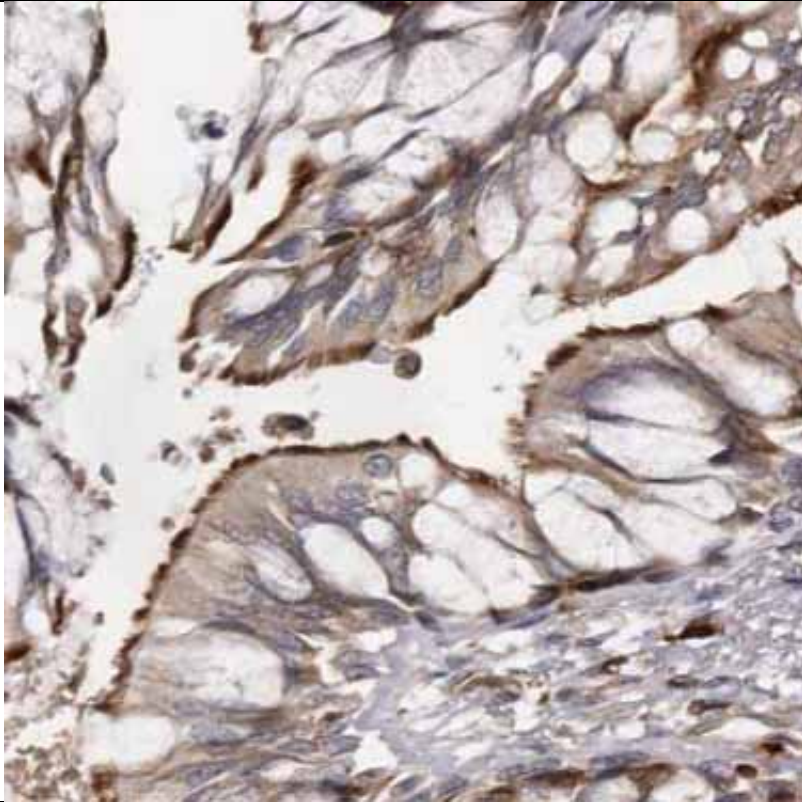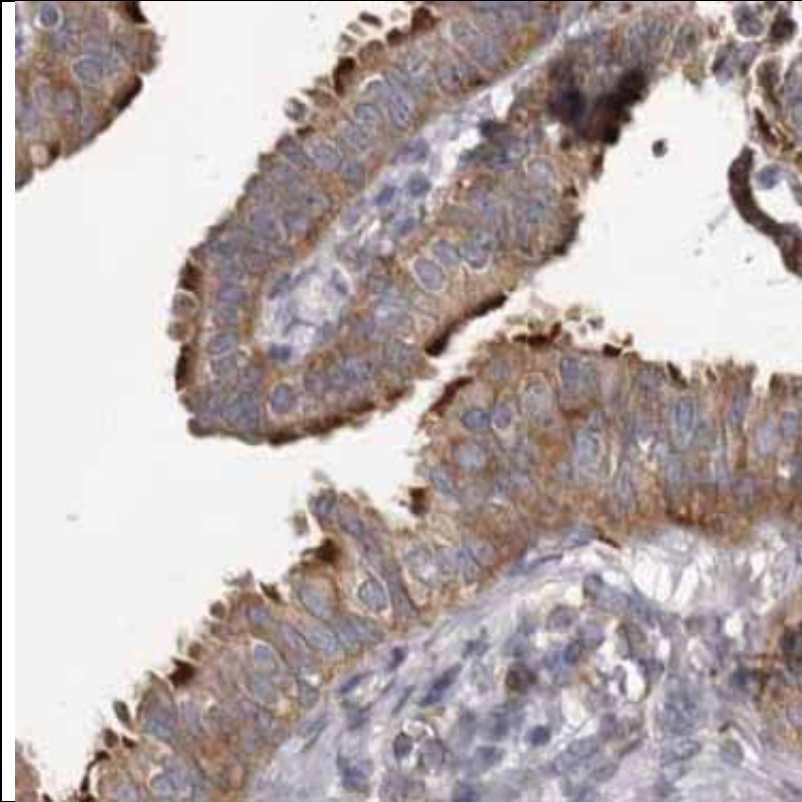

Staining is  
specific to  
*cilia*

UBXN10  
(antibody  
HPA028555)

Category 2

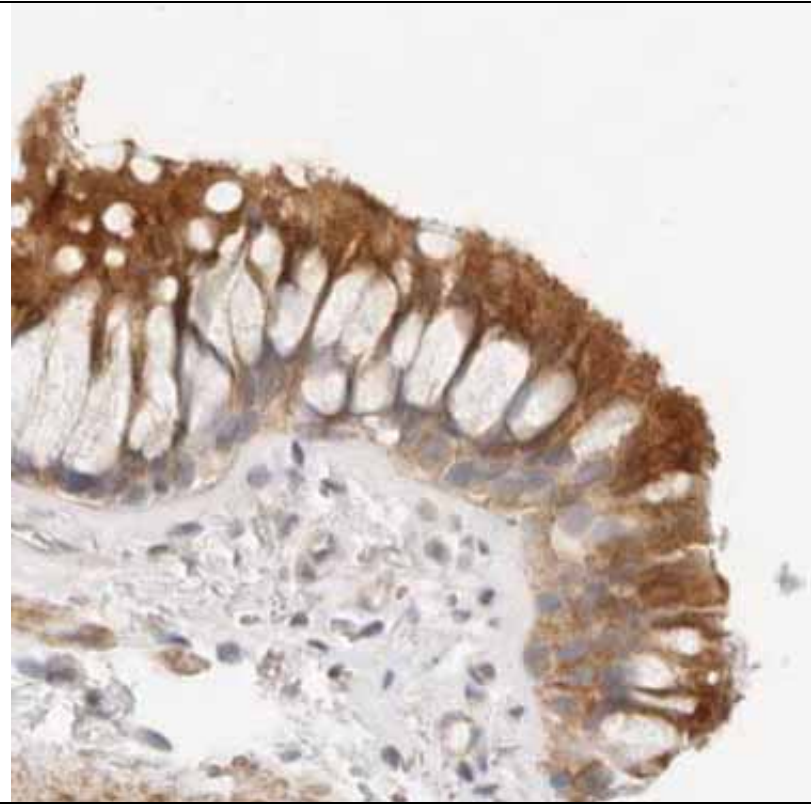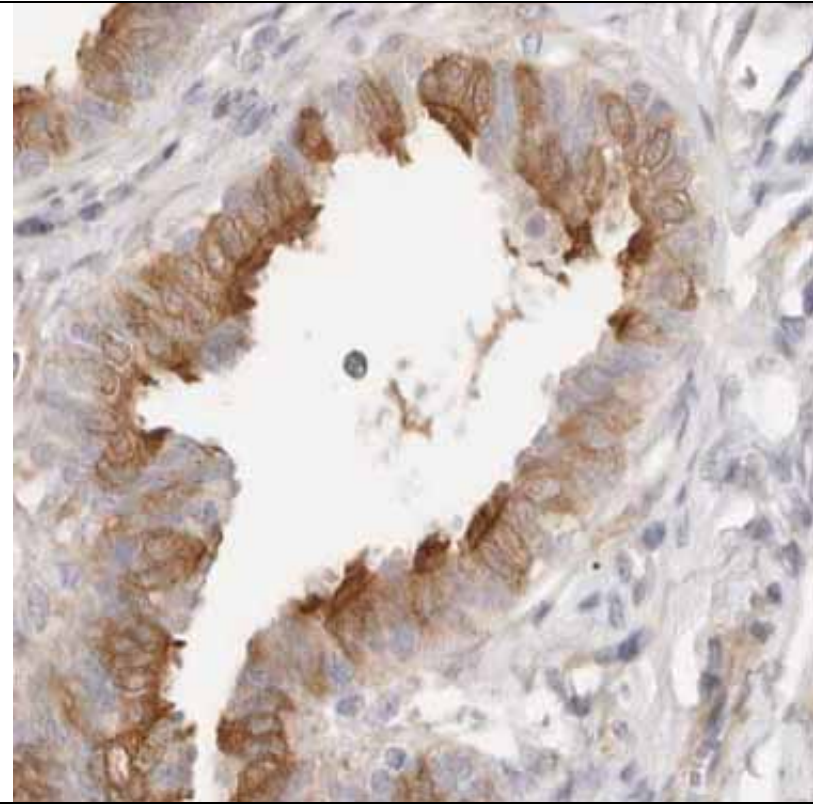

Staining is  
specific to  
*cilia*

C6orf103  
(antibody  
HPA036341)

Category 2

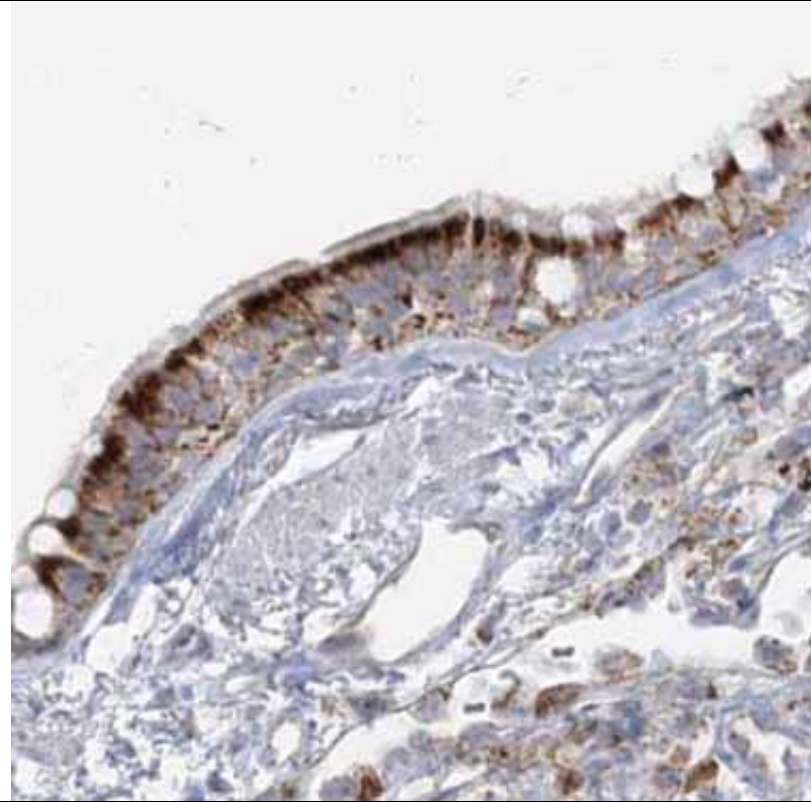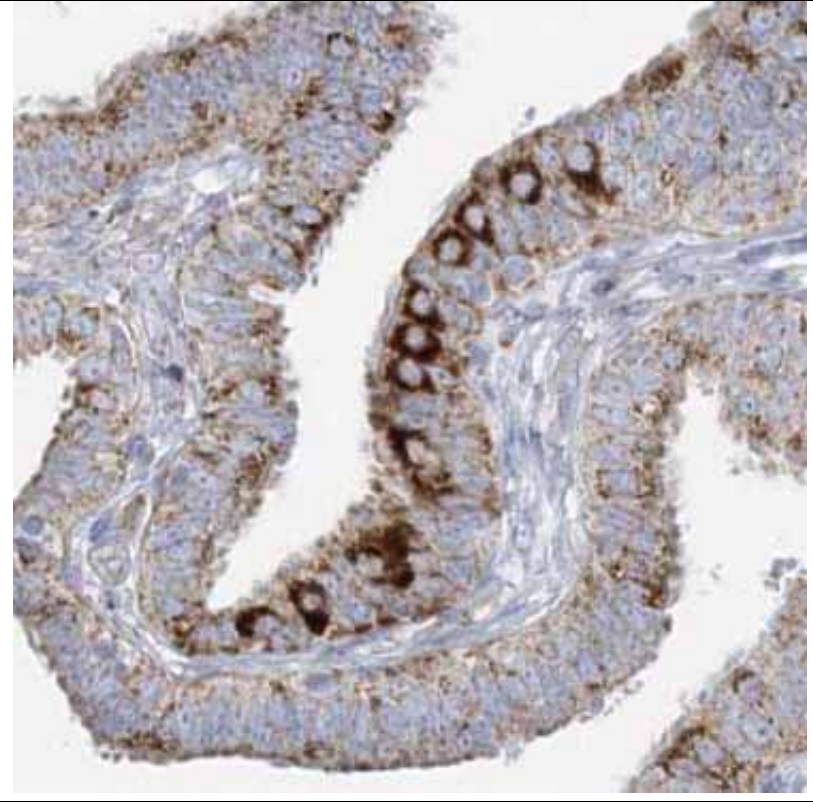

Staining is  
specific to  
*ciliated cells*  
(uncertain  
subcellular  
localization)

FANK1  
(antibody  
HPA038413)

Category 2

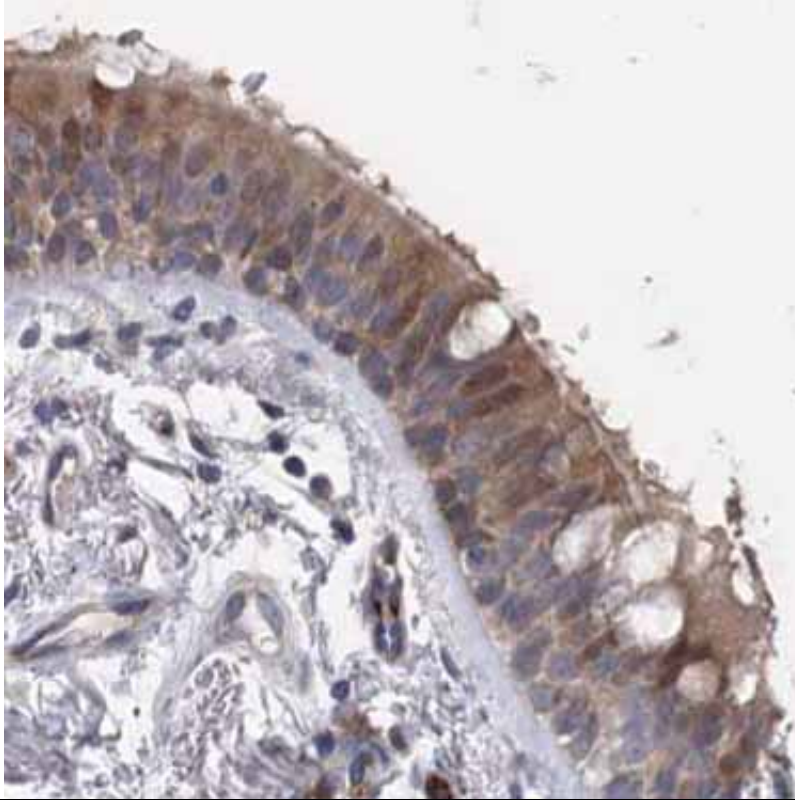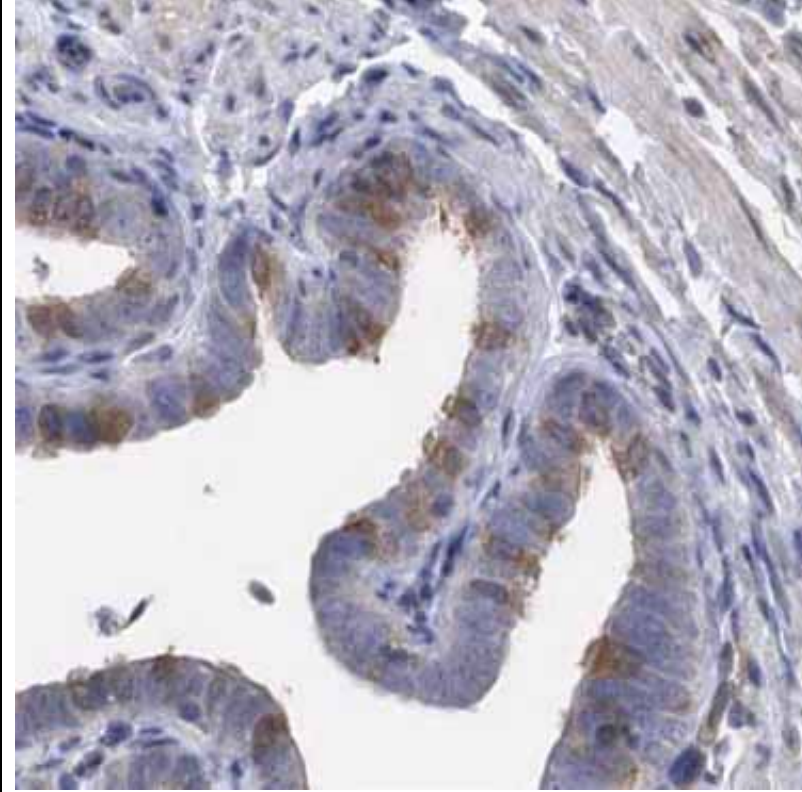

Staining is  
specific to  
*ciliated cells*  
(cilia and  
cytoplasm)

LRR6  
(antibody  
HPA028058)

Category 2

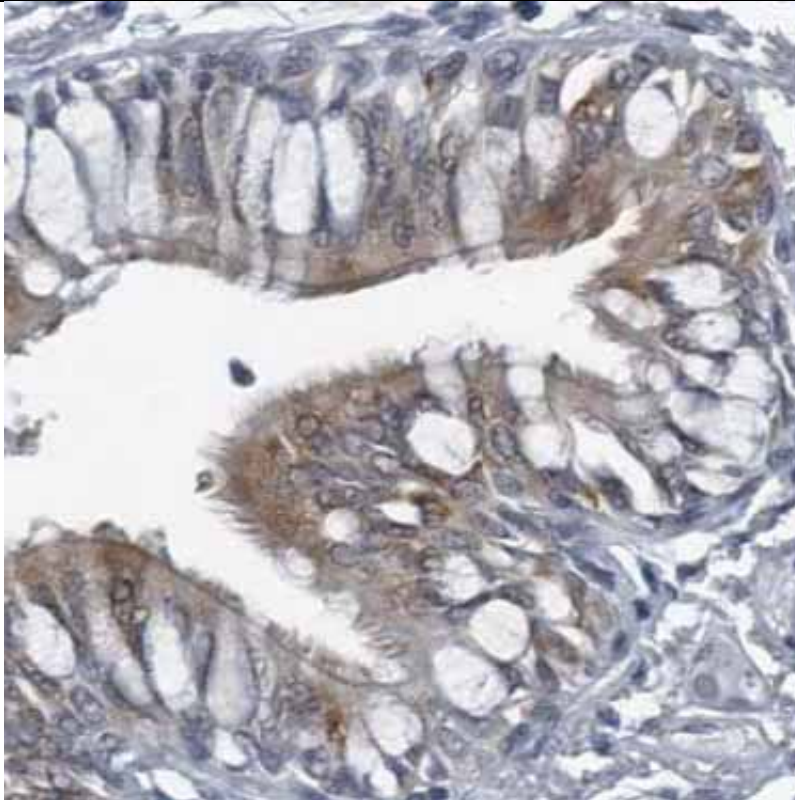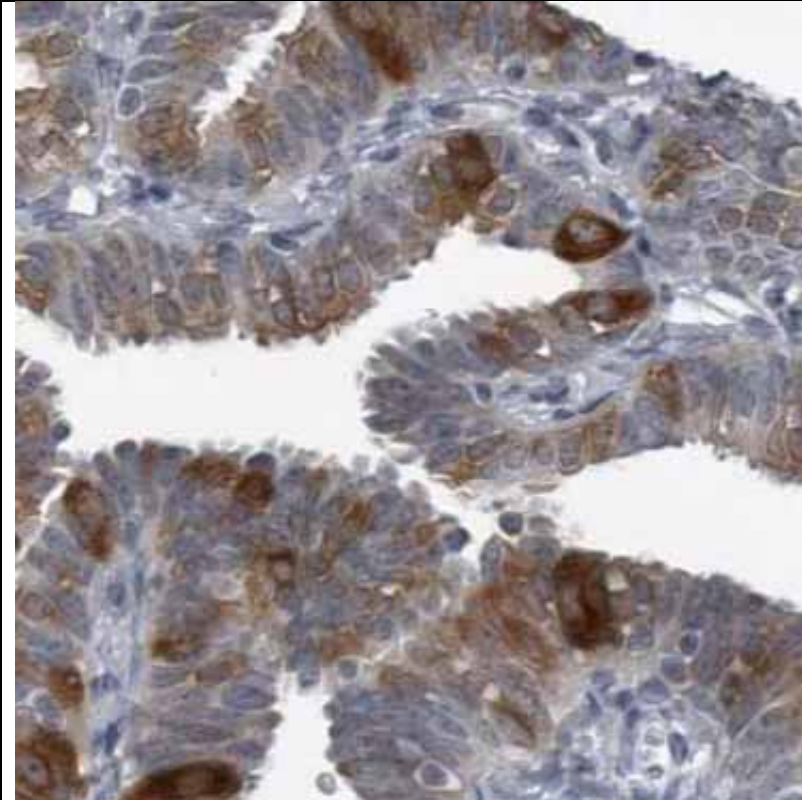

Staining is  
specific to  
*ciliated cells*  
(uncertain  
subcellular  
localization)

NEK10  
(antibody  
HPA038941)

Category 2

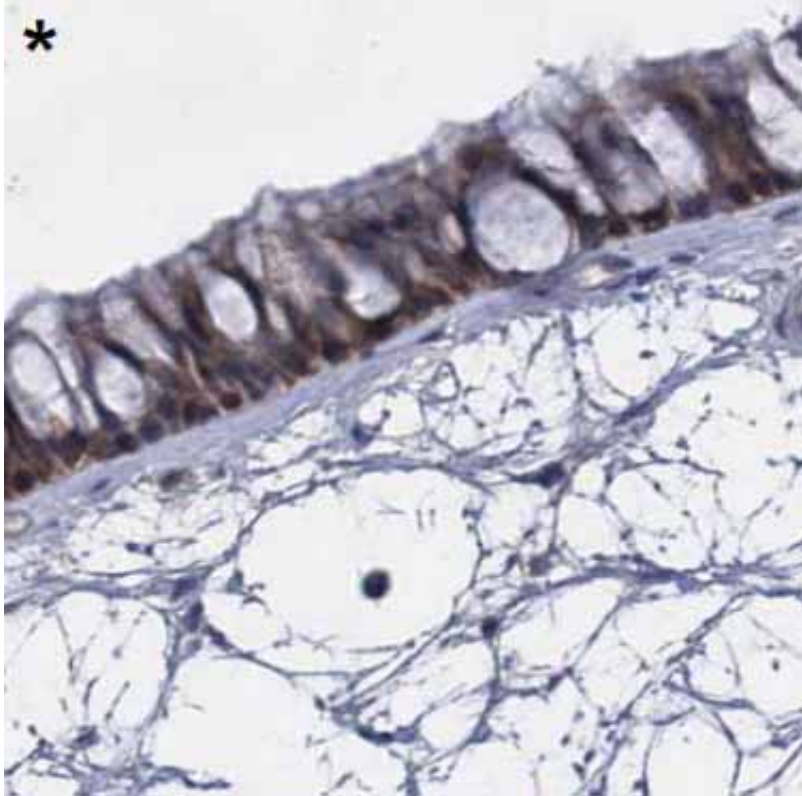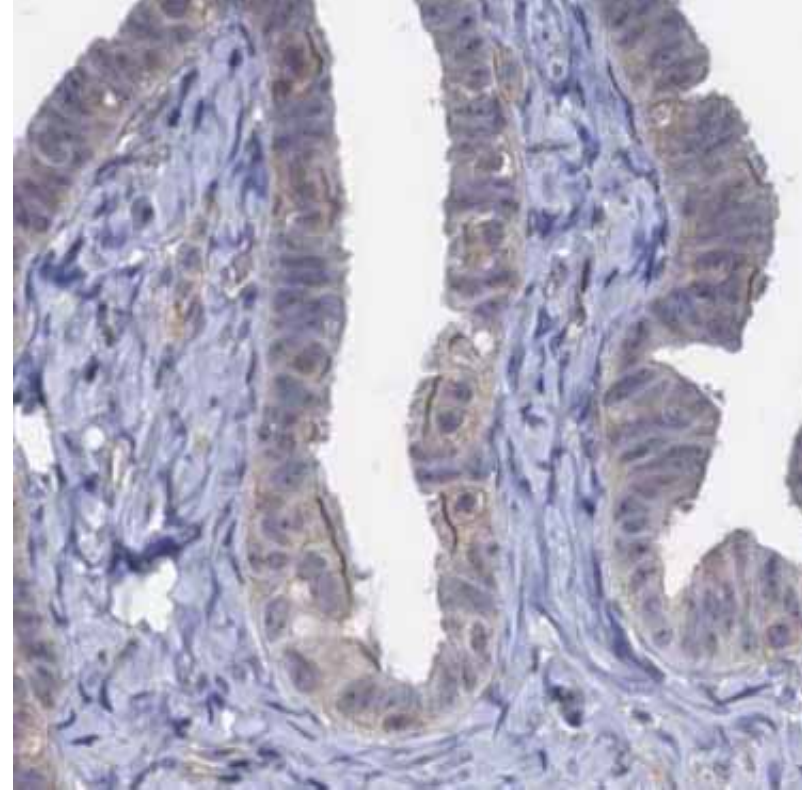

Staining is  
specific to  
*ciliated cells*  
(uncertain  
subcellular  
localization)

PPP1R16A  
(antibody  
HPA023755)

Category 2

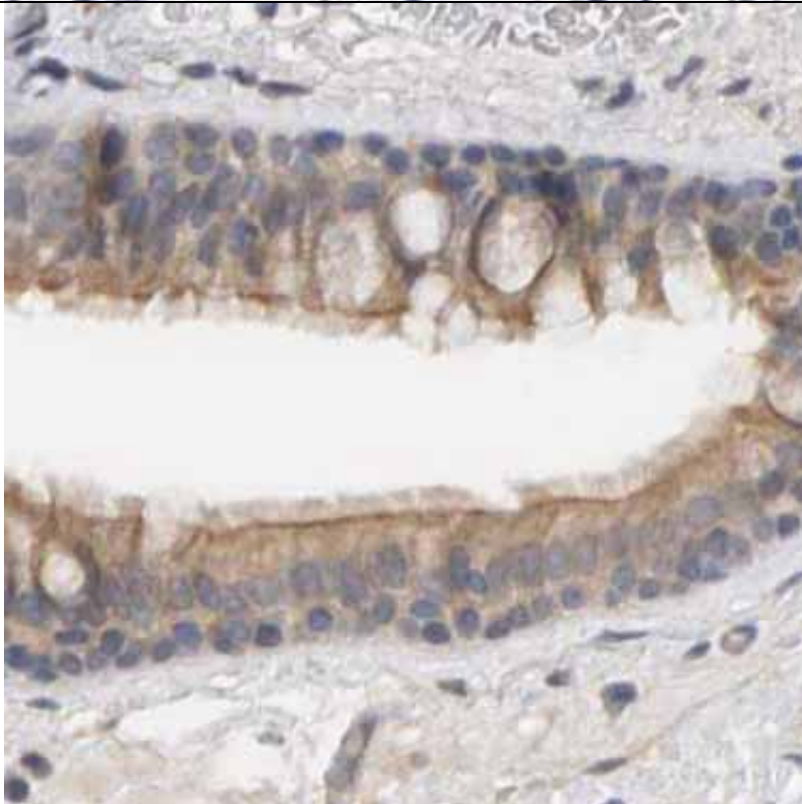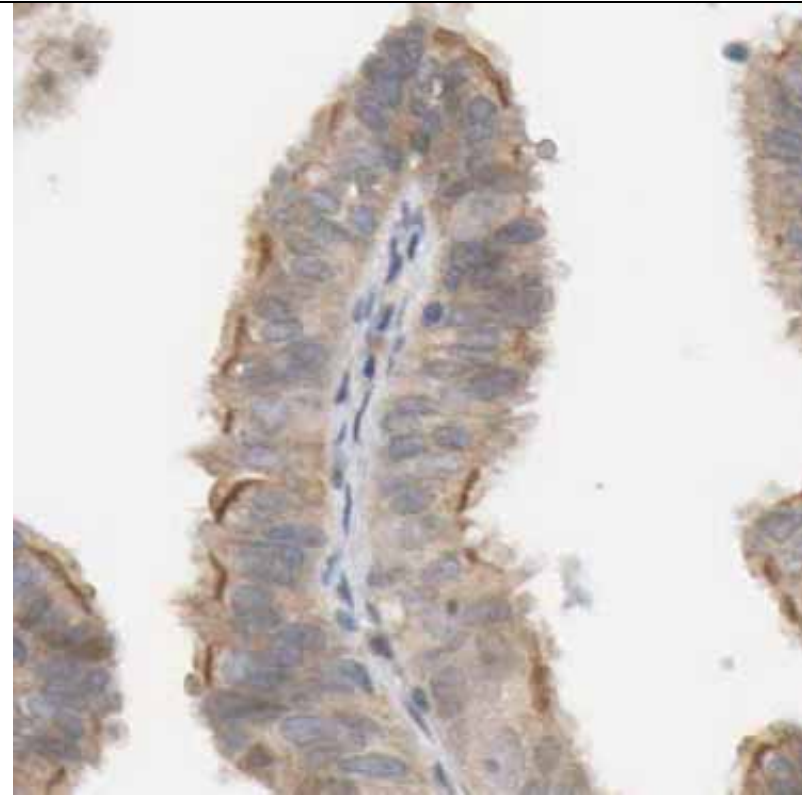

Staining is  
specific to  
*ciliated cells*  
(apical  
cytoplasm)

RBKS  
(antibody  
HPA019725)

Category 2

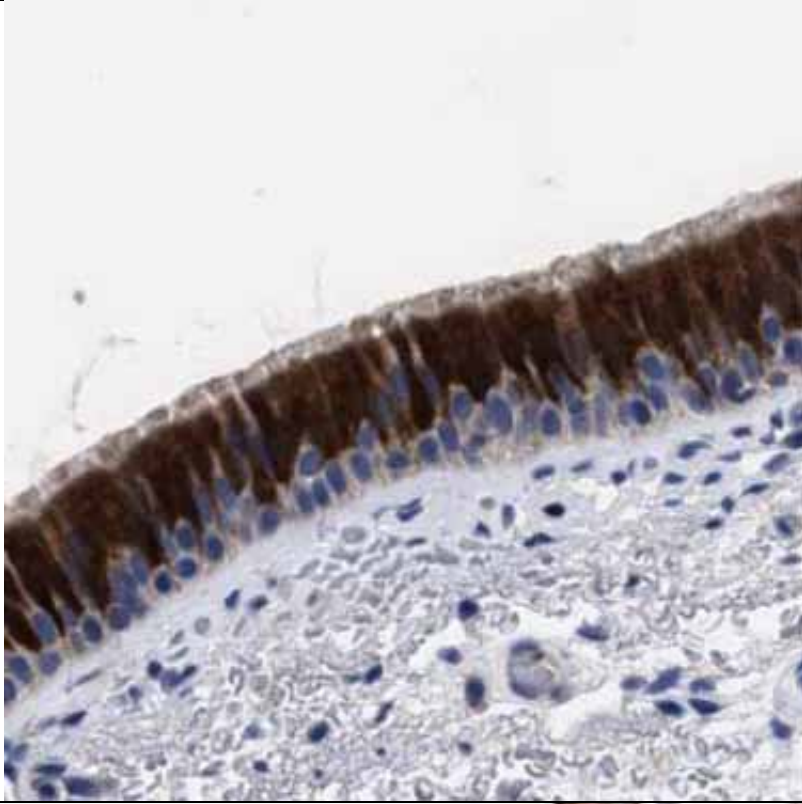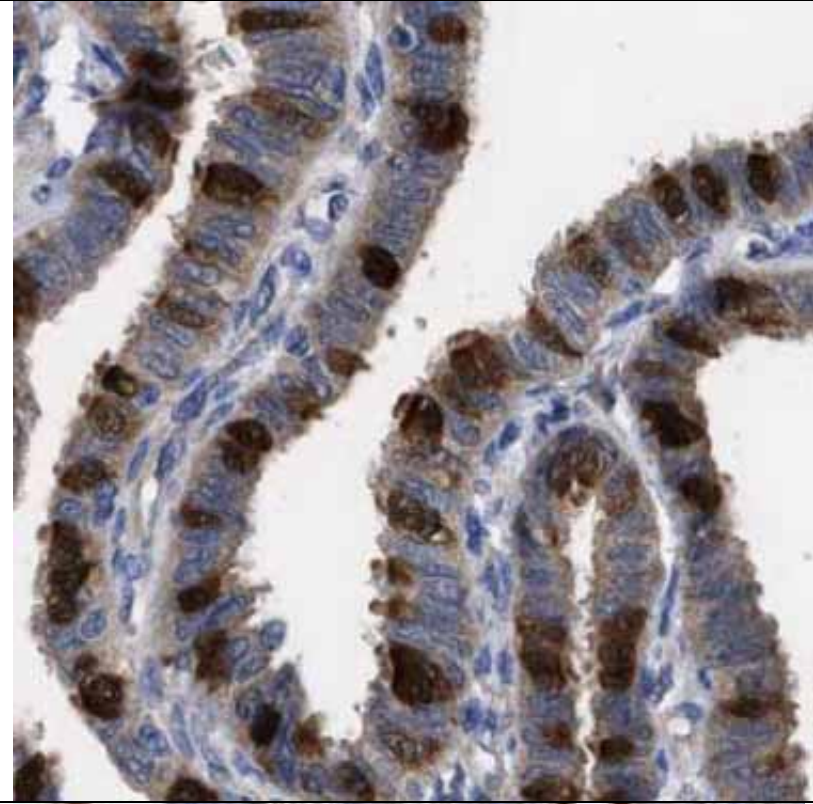

Staining is  
specific to  
*ciliated cells*  
(cilia and  
cytoplasm)

SPATA18  
(antibody  
HPA036854)

Category 2

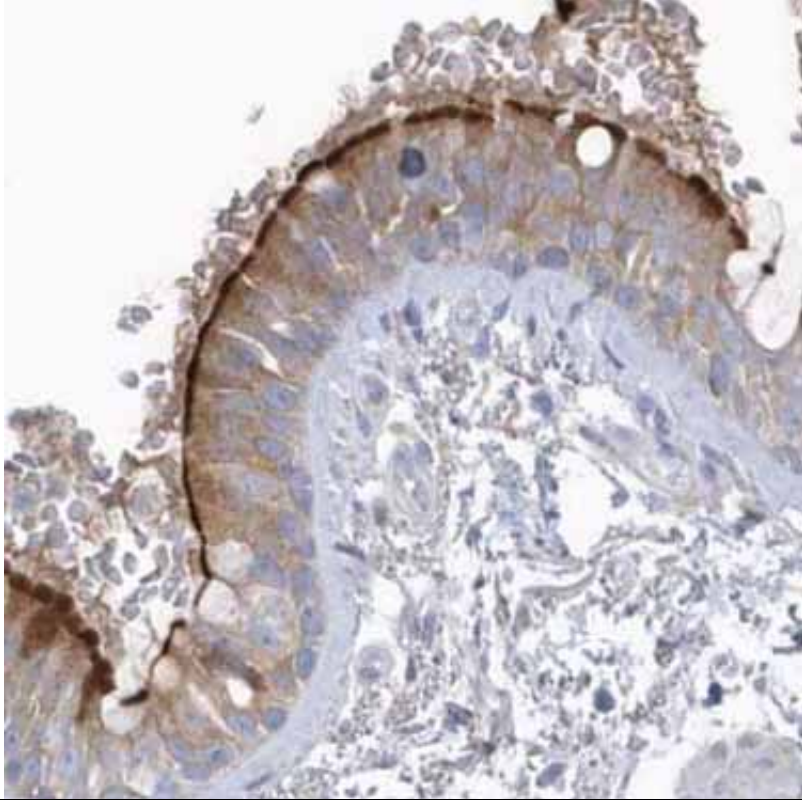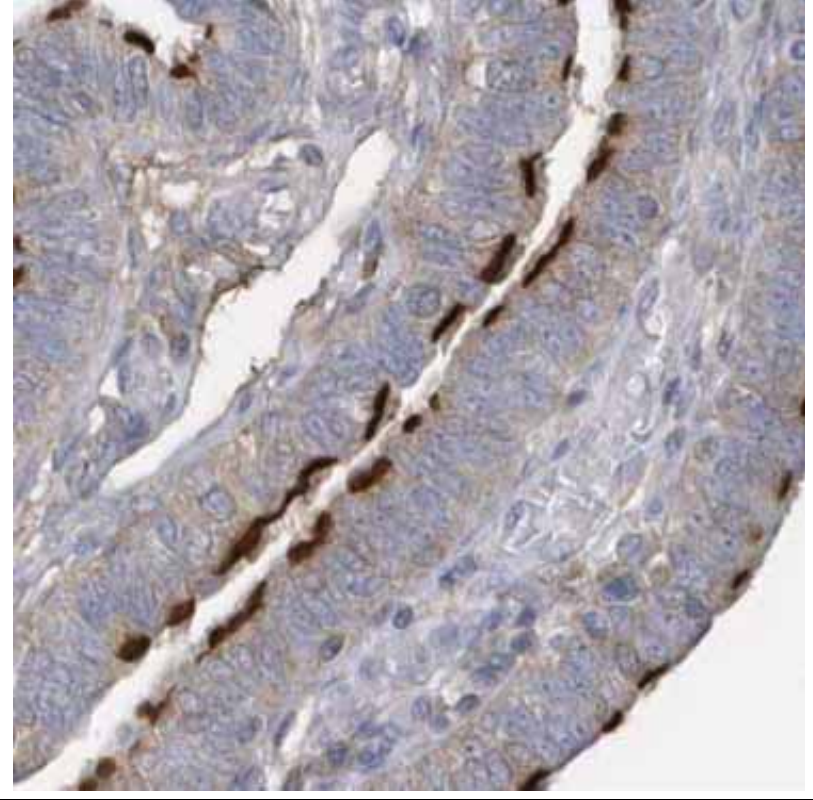

Staining is  
specific to  
*ciliated cells*  
(apical  
cytoplasm)

WDR49  
(antibody  
HPA036225)

Category 2

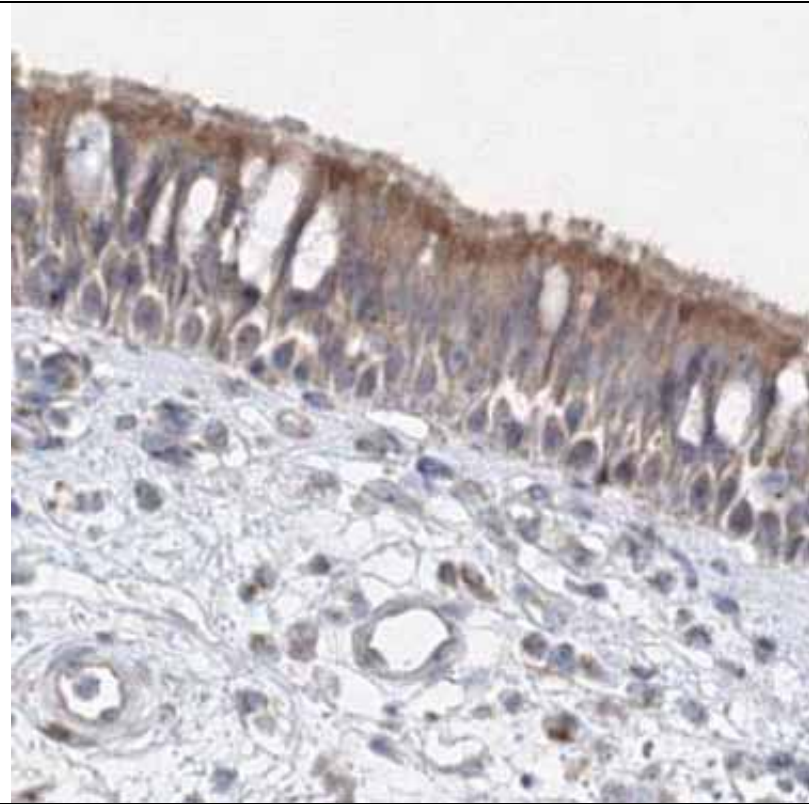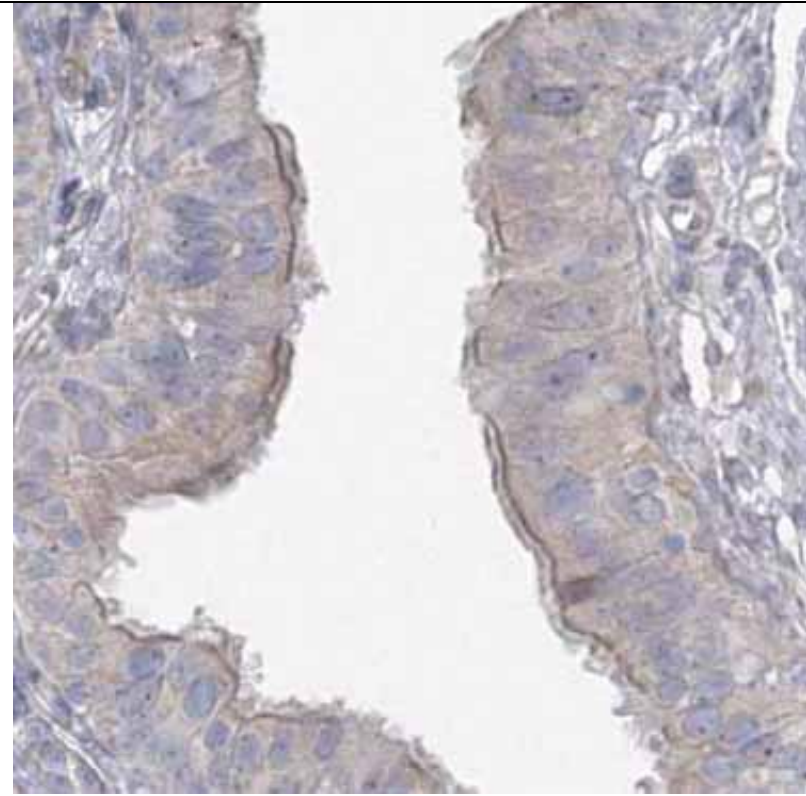

Staining is  
specific to  
*ciliated cells*  
(apical  
cytoplasm)

APOBEC4  
(antibody  
HPA015637)

Category 2

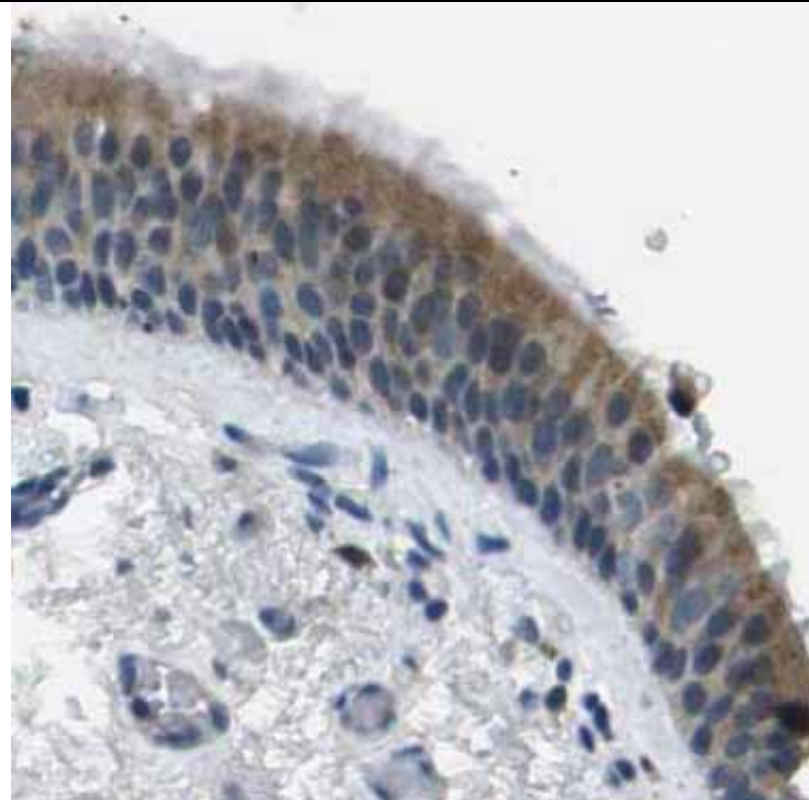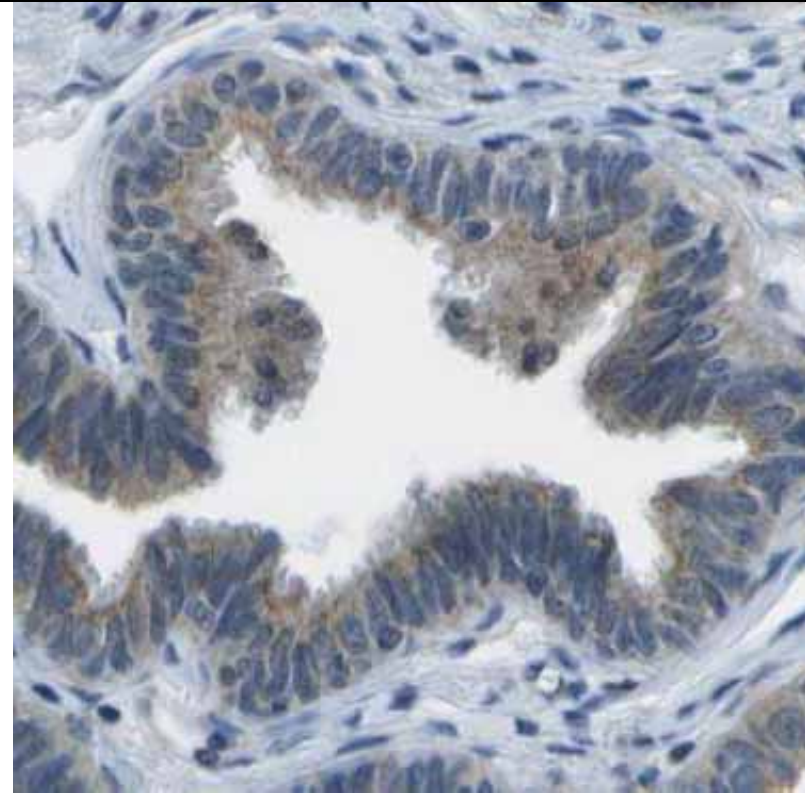

Staining is  
non-specific  
to ciliated  
cells or  
absent

C3orf25  
(antibody  
HPA037694)

Category 2

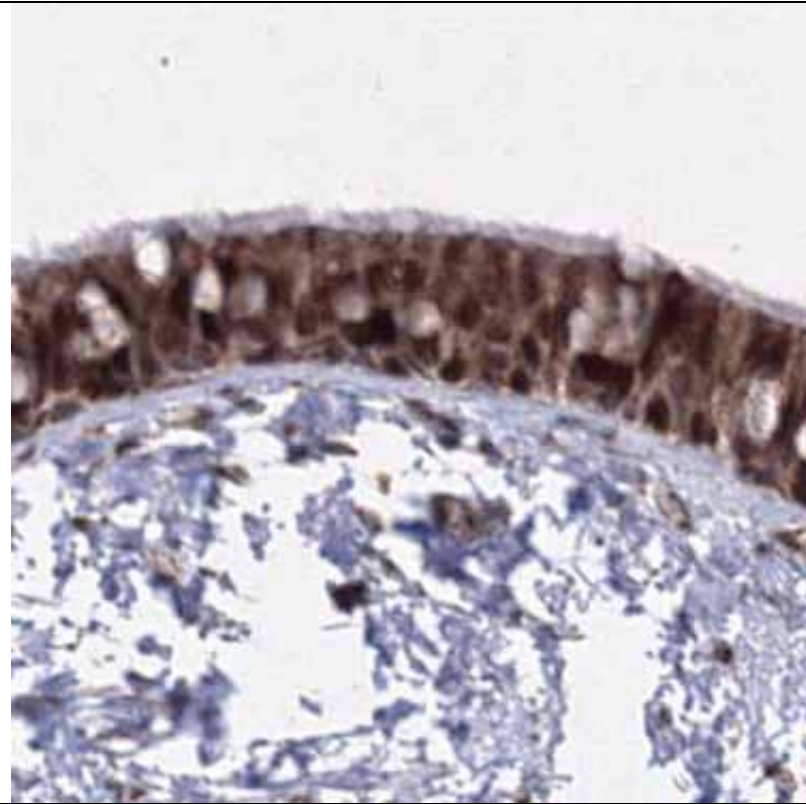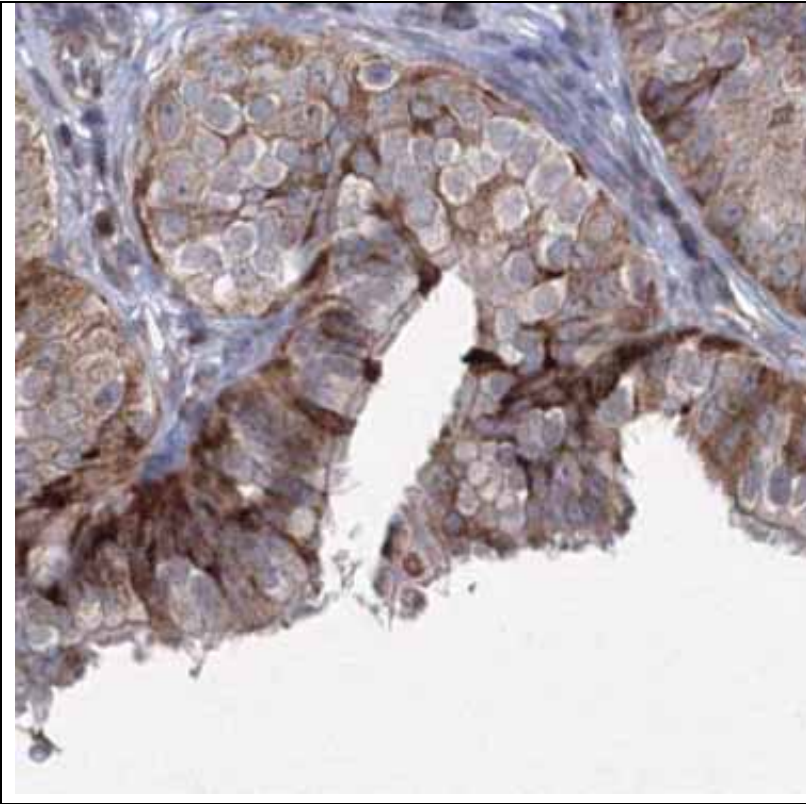

Staining is  
non-specific  
to ciliated  
cells or  
absent

CCDC60  
(antibody  
HPA039048)

Category 2

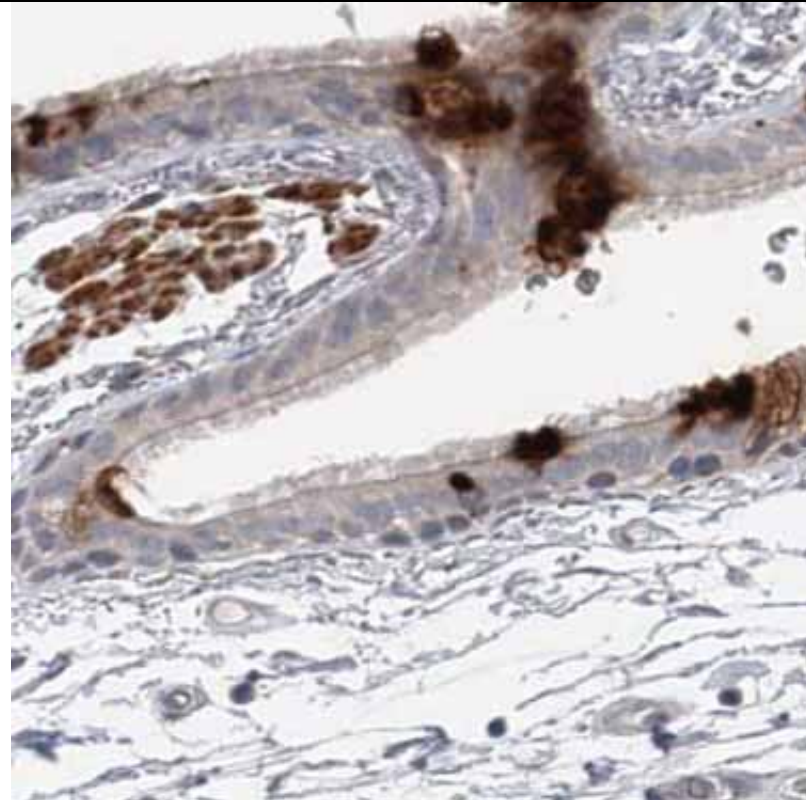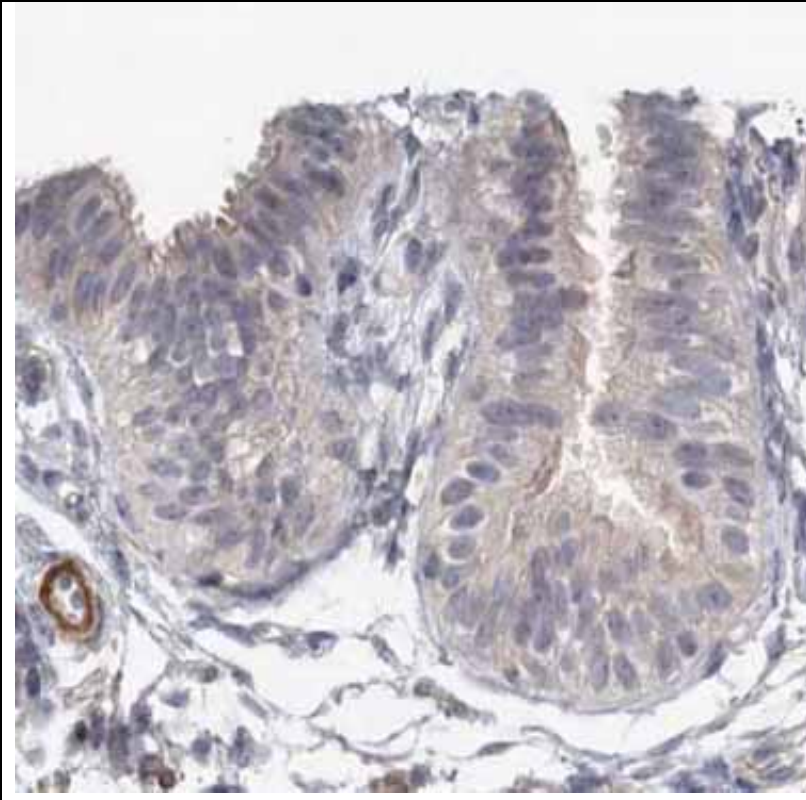

Staining is  
non-specific  
to ciliated  
cells or  
absent

FAM179A  
(antibody  
HPA037561)

Category 2

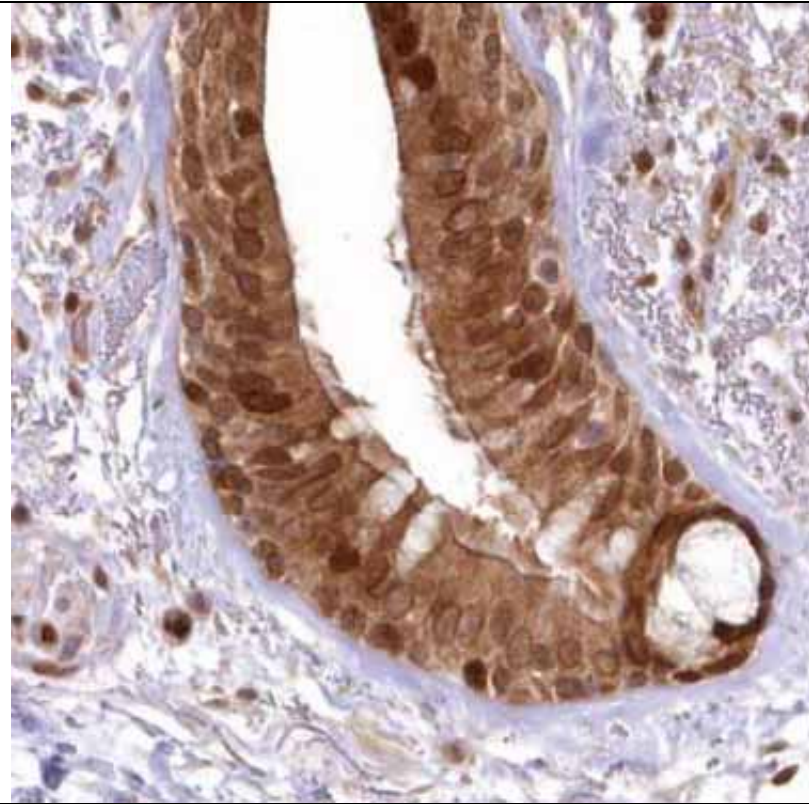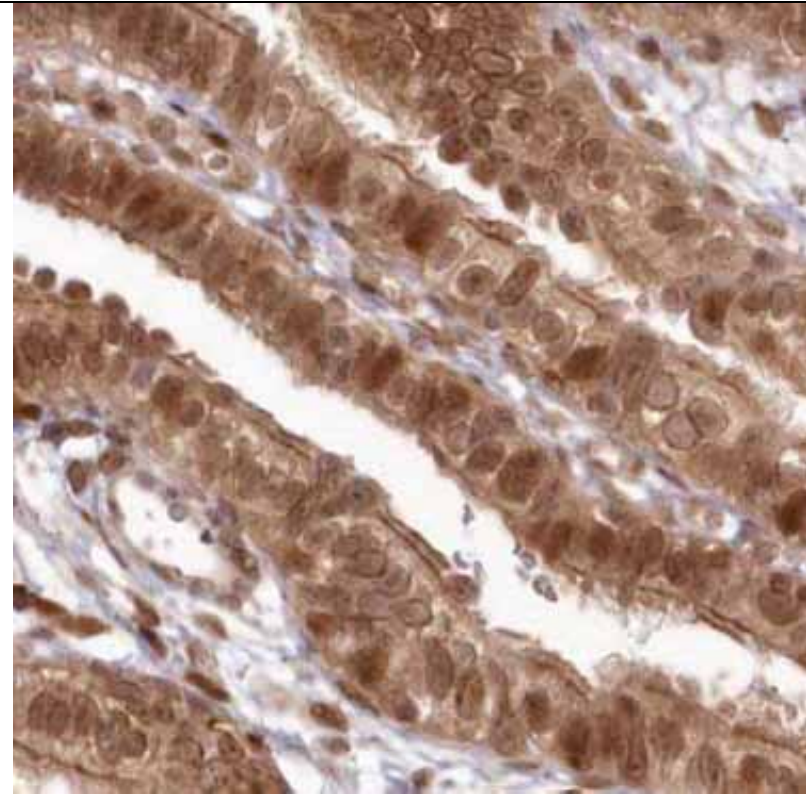

Staining is  
non-specific  
to ciliated  
cells or  
absent

KIAA1377  
(antibody  
HPA038399)

Category 2

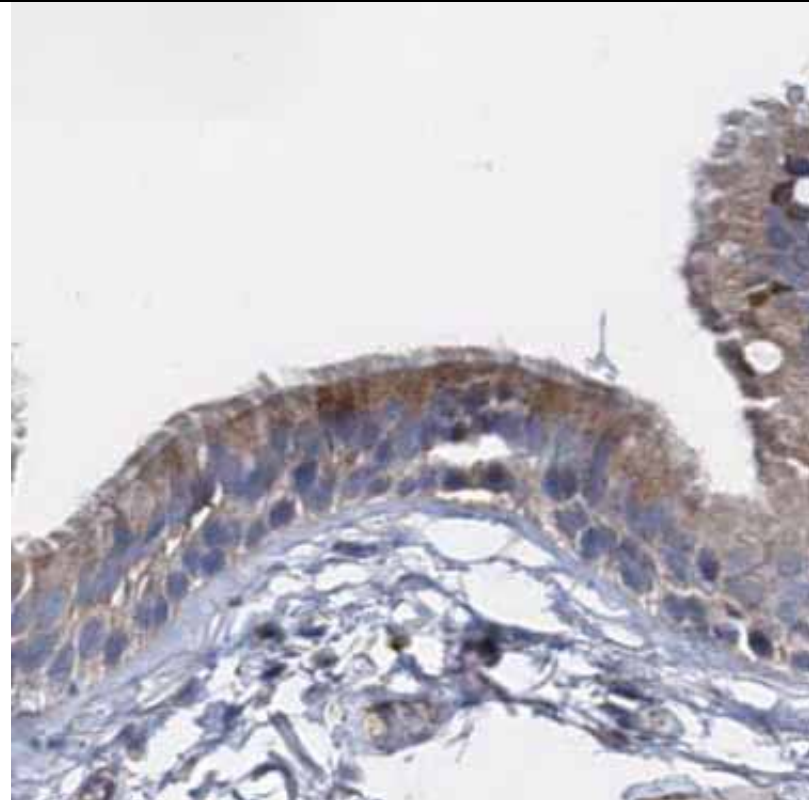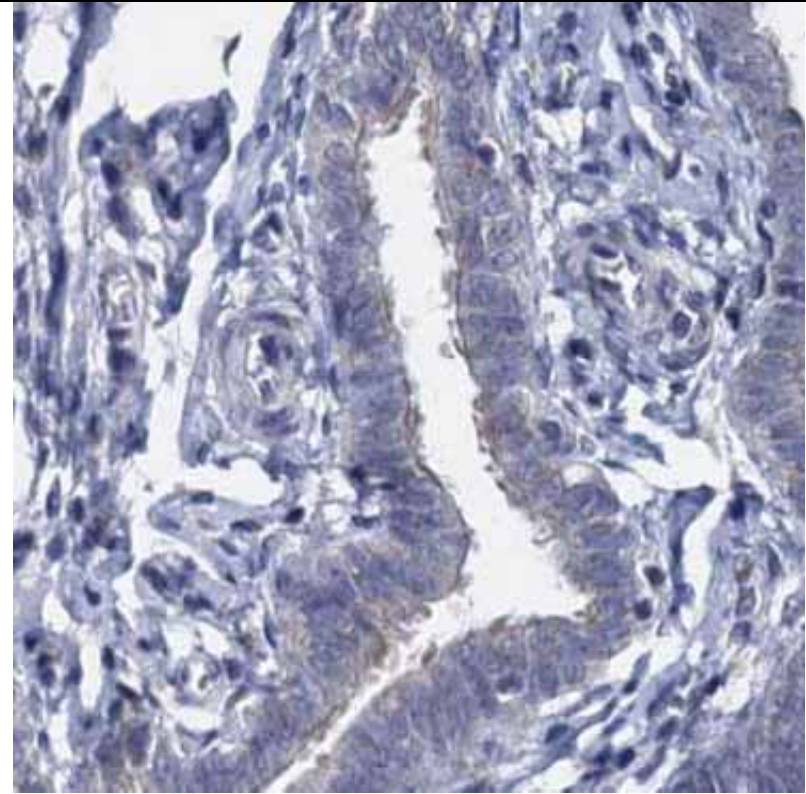

Staining is  
non-specific  
to ciliated  
cells or  
absent



KLHDC9  
(antibody  
HPA032058)

Category 2

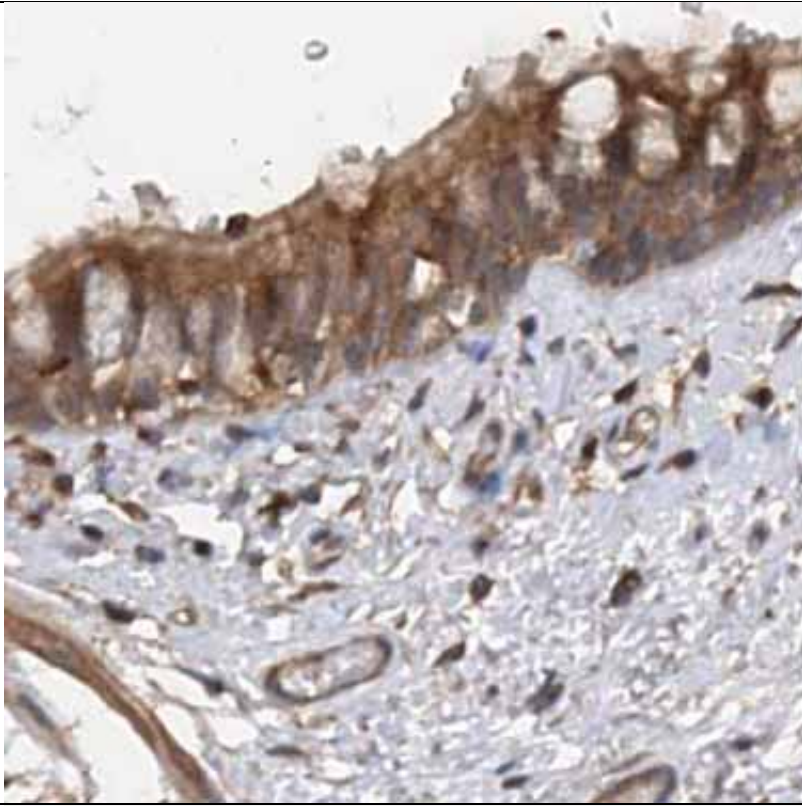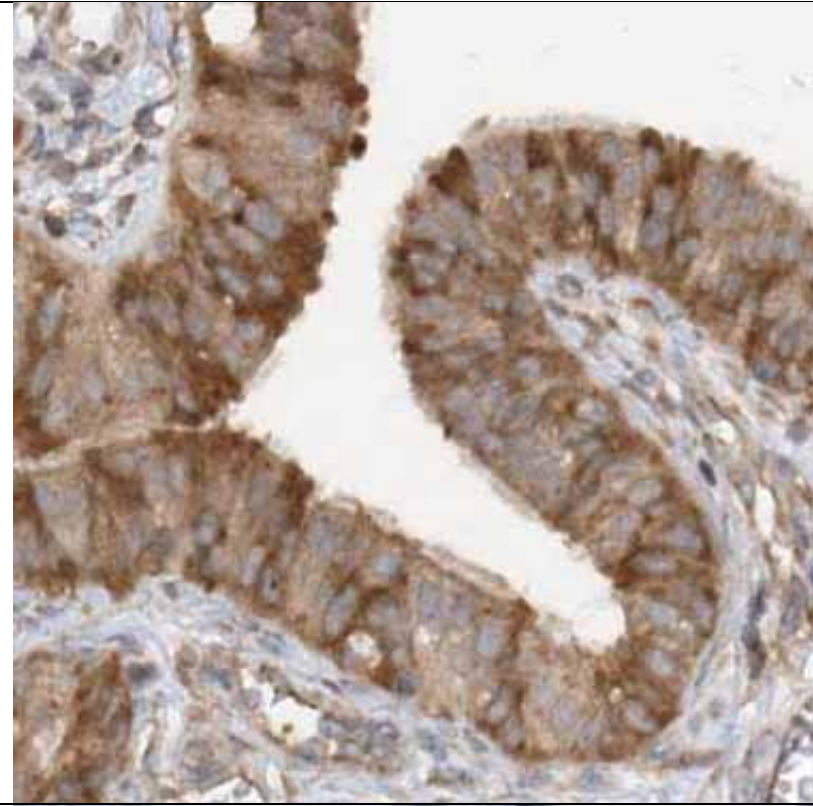

Staining is  
non-specific  
to ciliated  
cells or  
absent

NEK11  
(antibody  
HPA016908)

Category 2

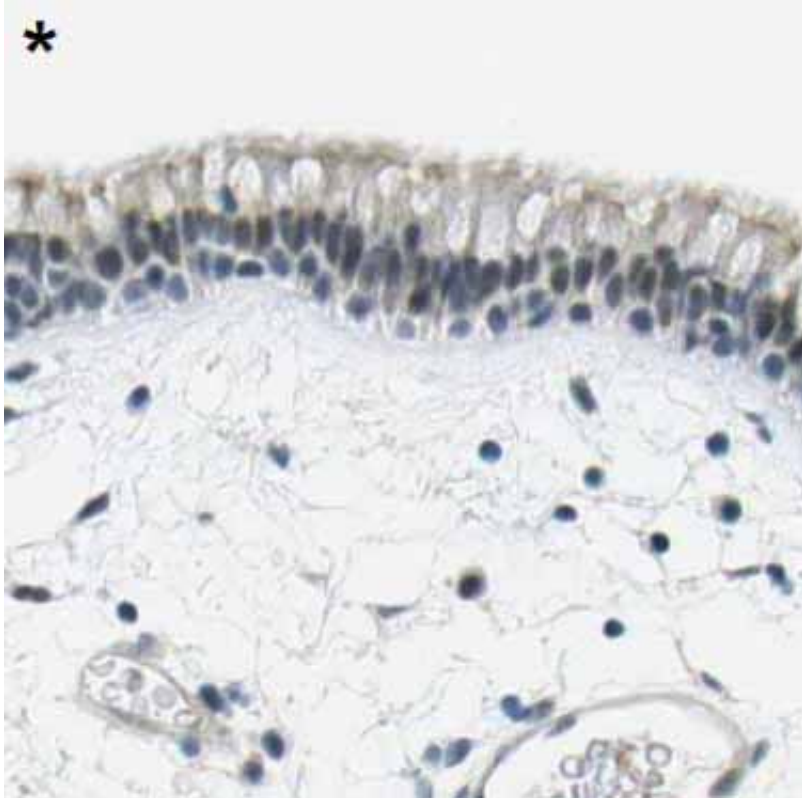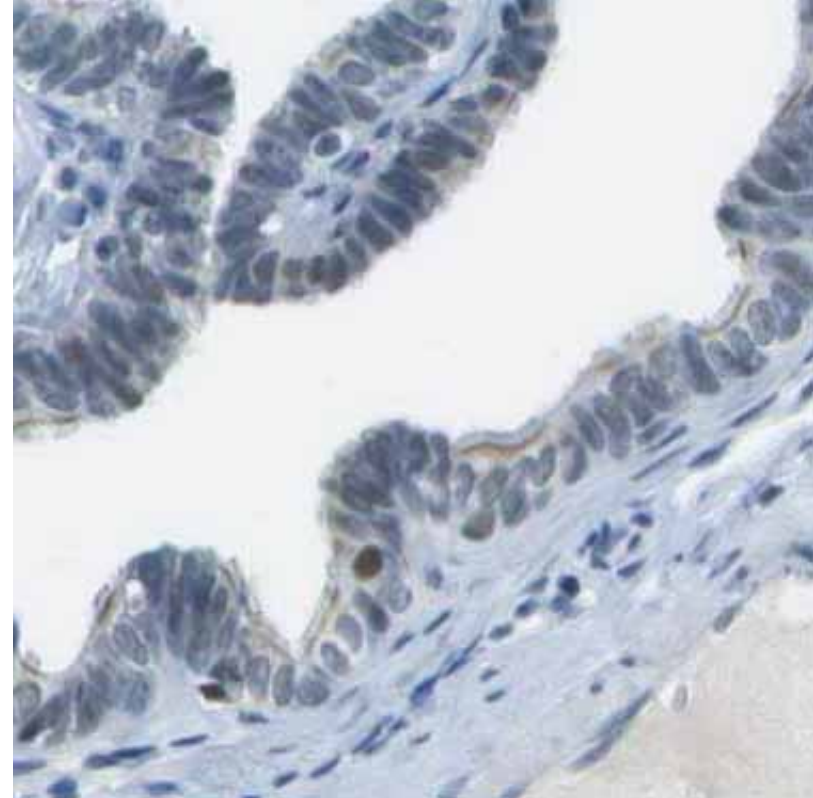

Staining is  
non-specific  
to ciliated  
cells or  
absent

|                                                       |                                                                                     |                                                                                      |                                                             |
|-------------------------------------------------------|-------------------------------------------------------------------------------------|--------------------------------------------------------------------------------------|-------------------------------------------------------------|
| <p>SLFN13<br/>(antibody)<br/>Category 2</p>           | 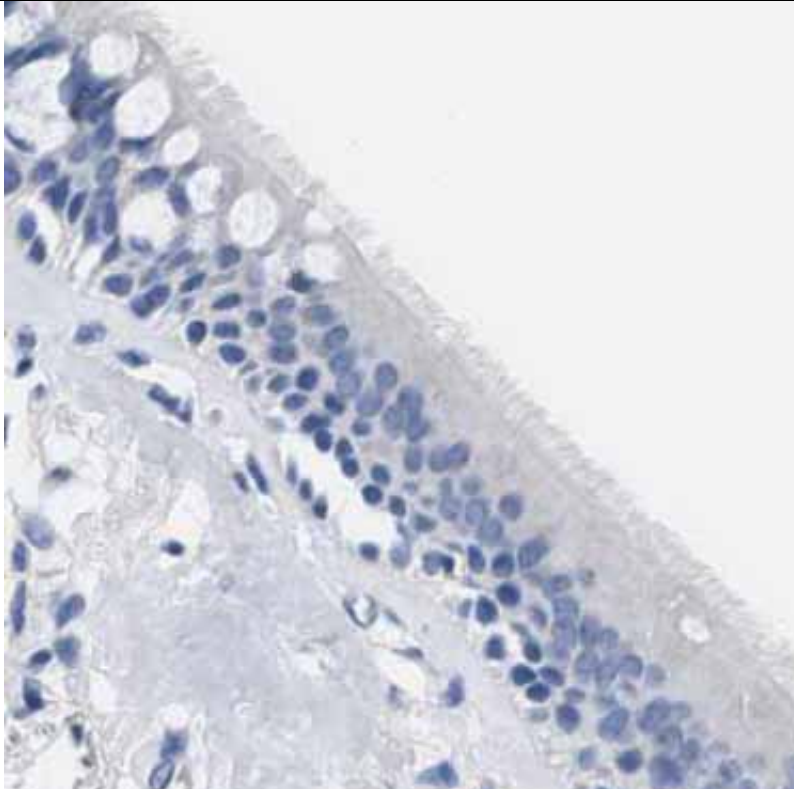  |   | <p>Staining is non-specific to ciliated cells or absent</p> |
| <p>SPATA4<br/>(antibody HPA019220)<br/>Category 2</p> |  |  | <p>Staining is non-specific to ciliated cells or absent</p> |

STOX1  
(antibody  
HPA037845)

Category 2

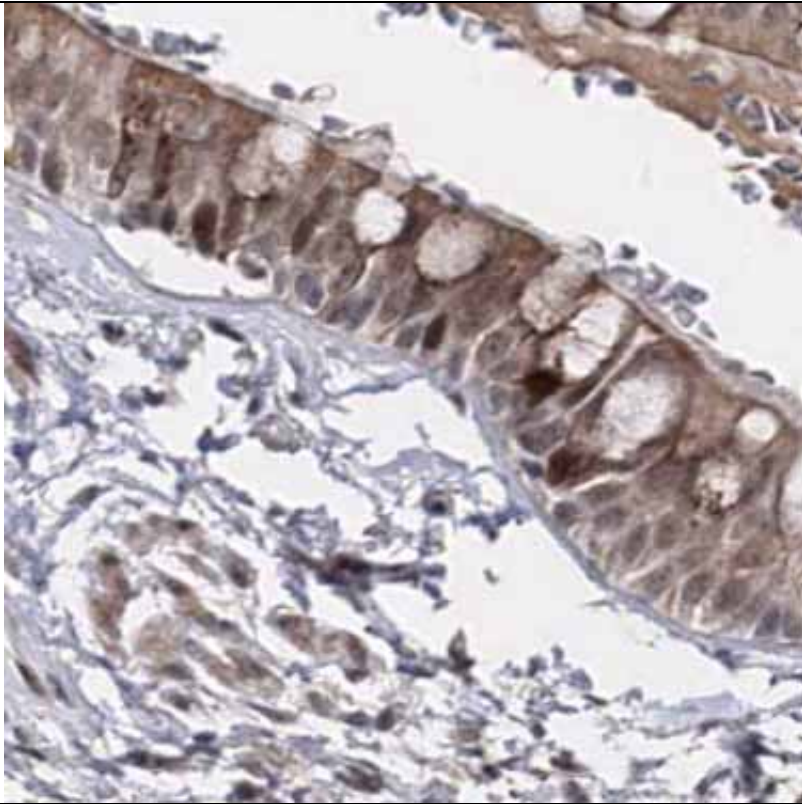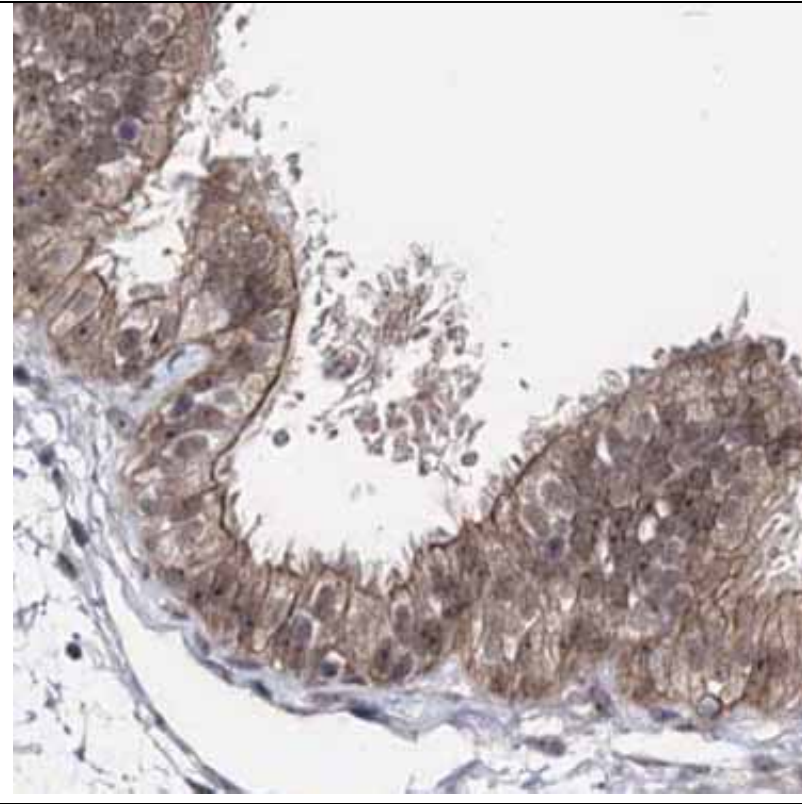

Staining is  
non-specific  
to ciliated  
cells or  
absent

TMEM17  
(antibody  
HPA018100)

Category 2

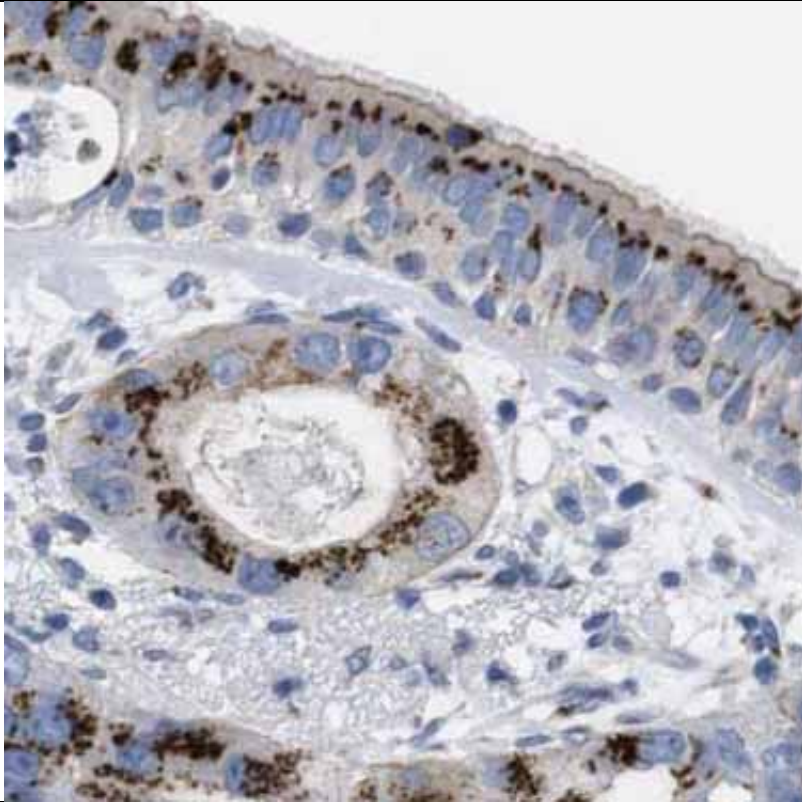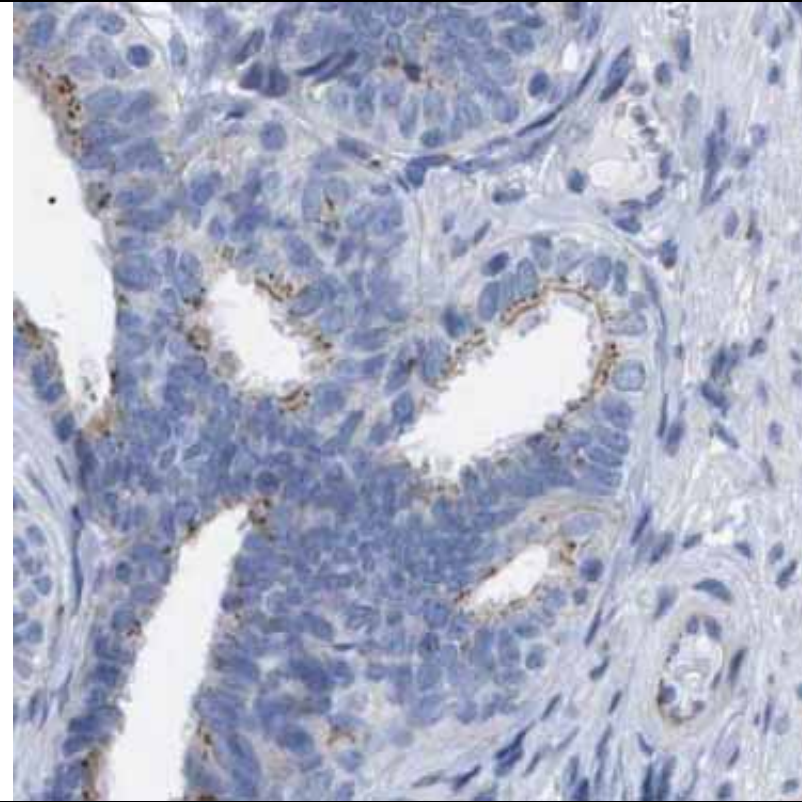

Staining is  
non-specific  
to ciliated  
cells or  
absent

WDR31  
(antibody  
HPA019347)

Category 2

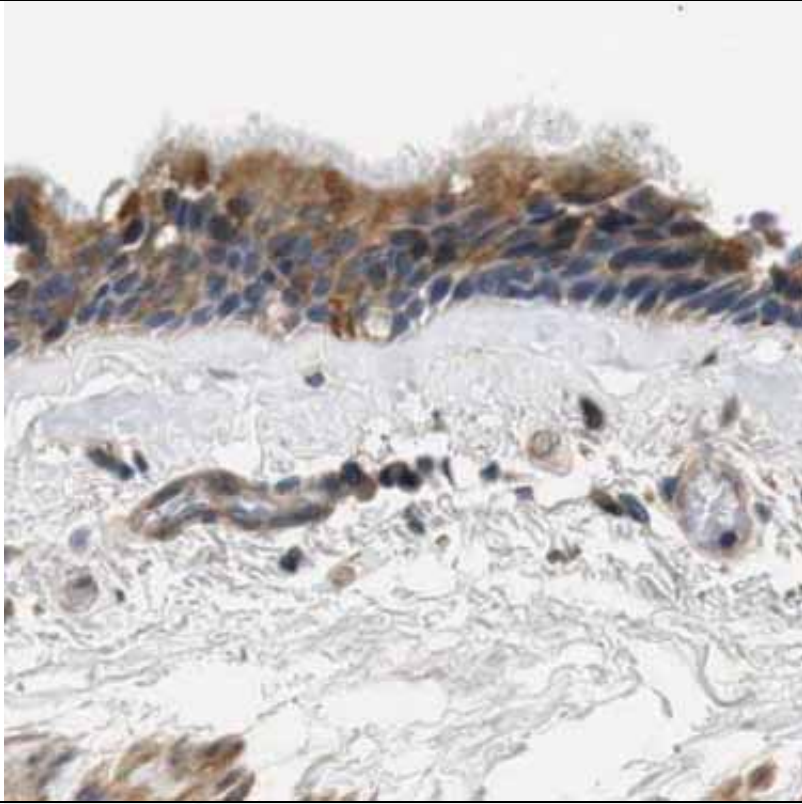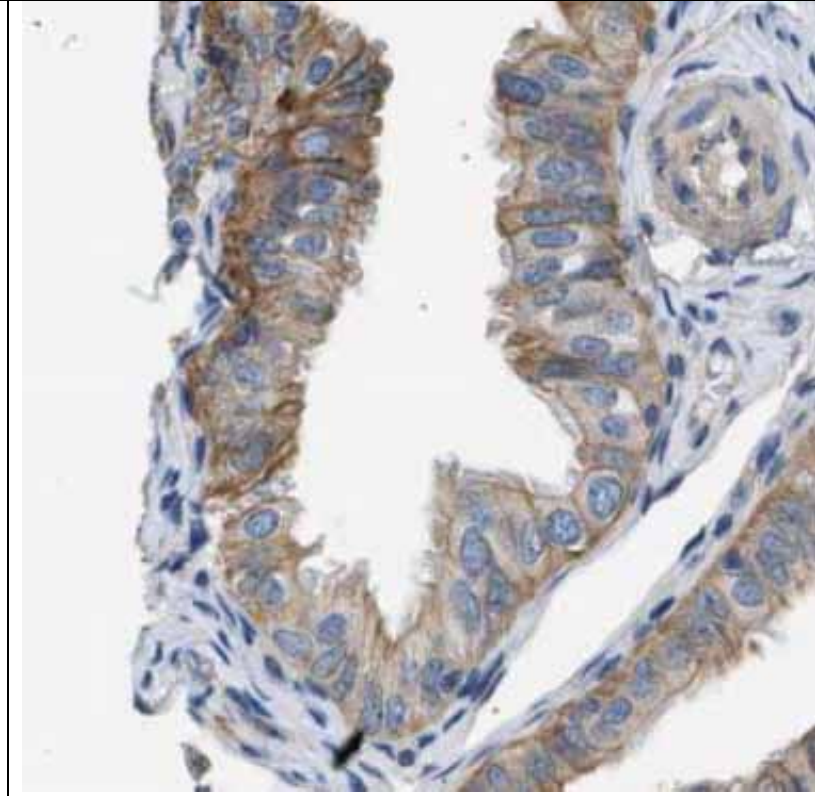

Staining is  
non-specific  
to ciliated  
cells or  
absent

ZNF20  
(antibody  
HPA020887)

Category 2

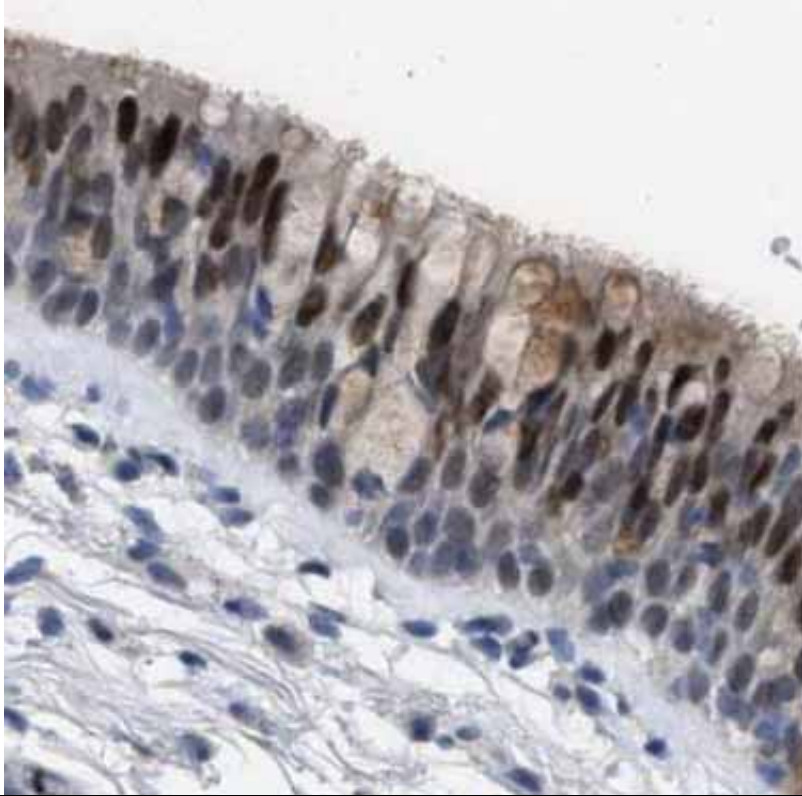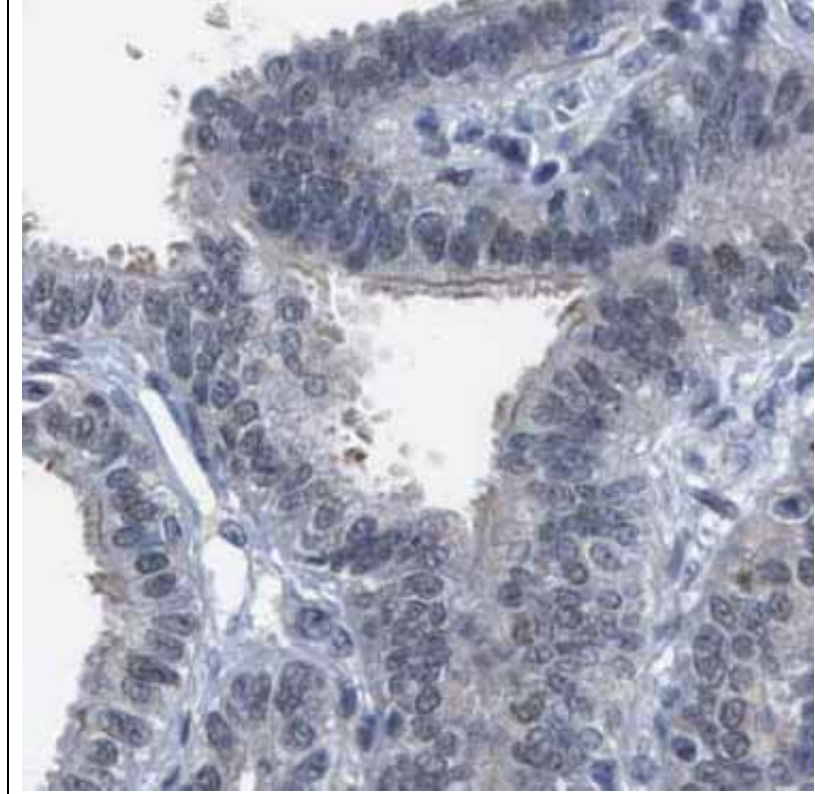

Staining is  
non-specific  
to ciliated  
cells or  
absent

### **Category 3**

(genes with no evidence  
for ciliary function from the *literature*)

Coverage: 48 proteins were available in Protein Atlas  
from the total of 74 proteins in the category

| Protein                                                      | Airways                                                                             | Fallopian tubes                                                                      | Summary                                             |
|--------------------------------------------------------------|-------------------------------------------------------------------------------------|--------------------------------------------------------------------------------------|-----------------------------------------------------|
| <p>ARMC2<br/>(antibody<br/>HPA025809)</p> <p>Category 3</p>  | 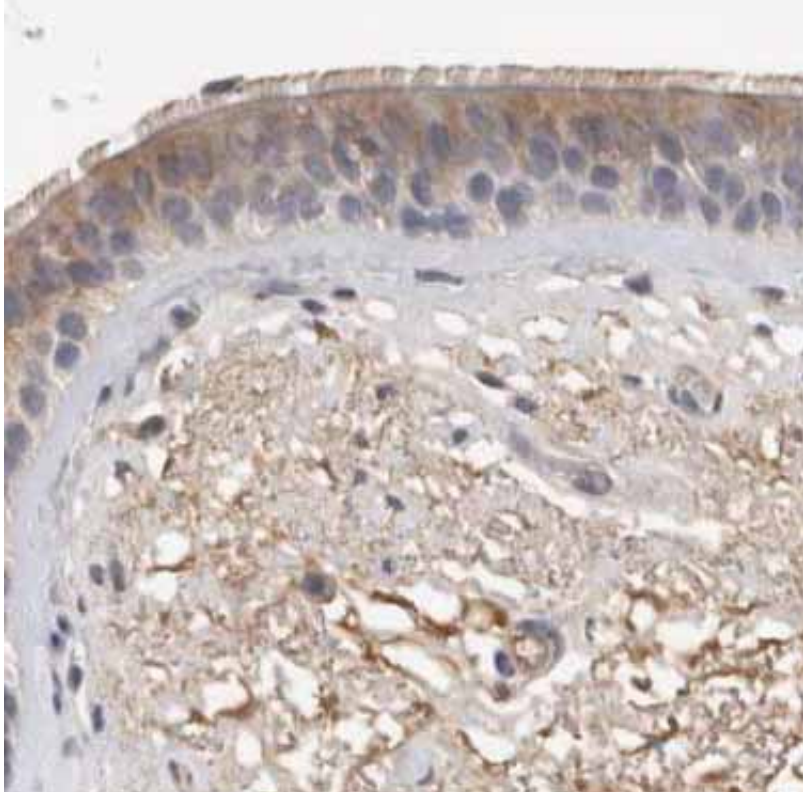  |   | <p>Staining is<br/>specific to<br/><i>cilia</i></p> |
| <p>BAIAP3<br/>(antibody<br/>HPA015627)</p> <p>Category 3</p> |  |  | <p>Staining is<br/>specific to<br/><i>cilia</i></p> |

C1orf92  
(antibody  
HPA028442)

Category 3

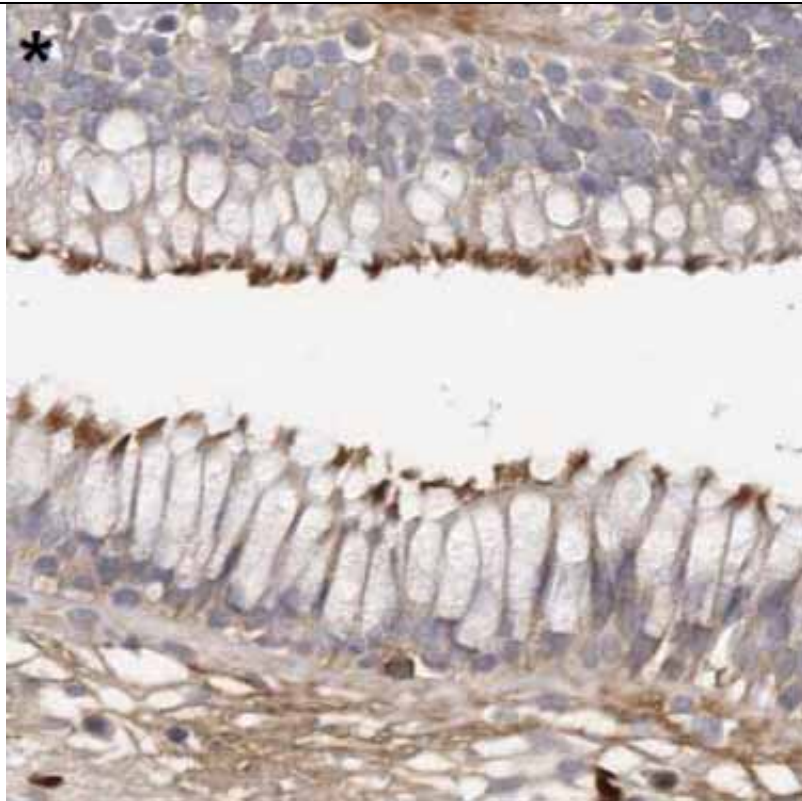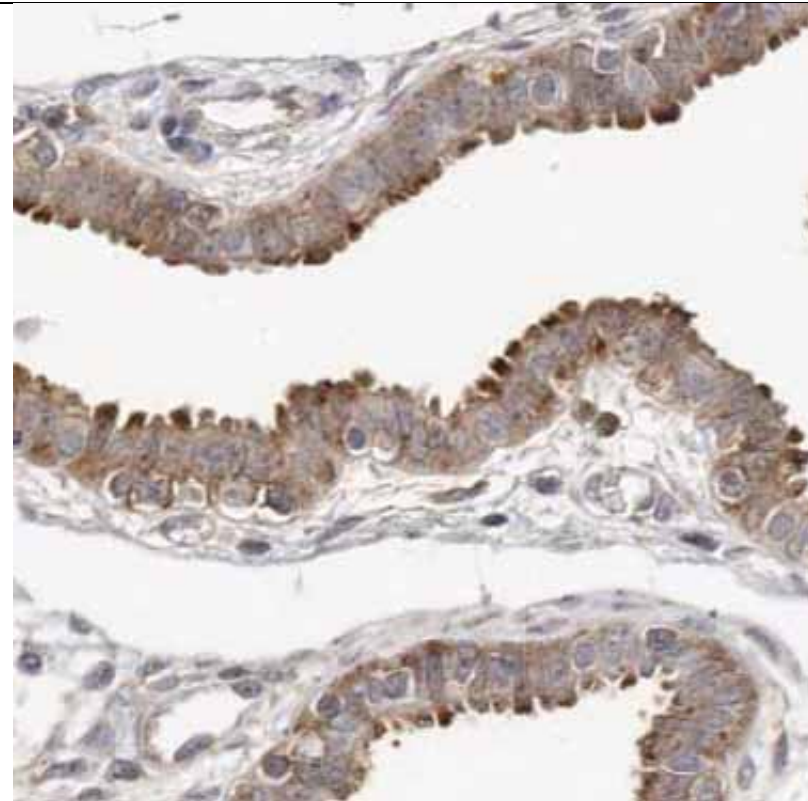

Staining is  
specific to  
*cilia*

C10orf92  
(antibody  
HPA037786)

Category 3

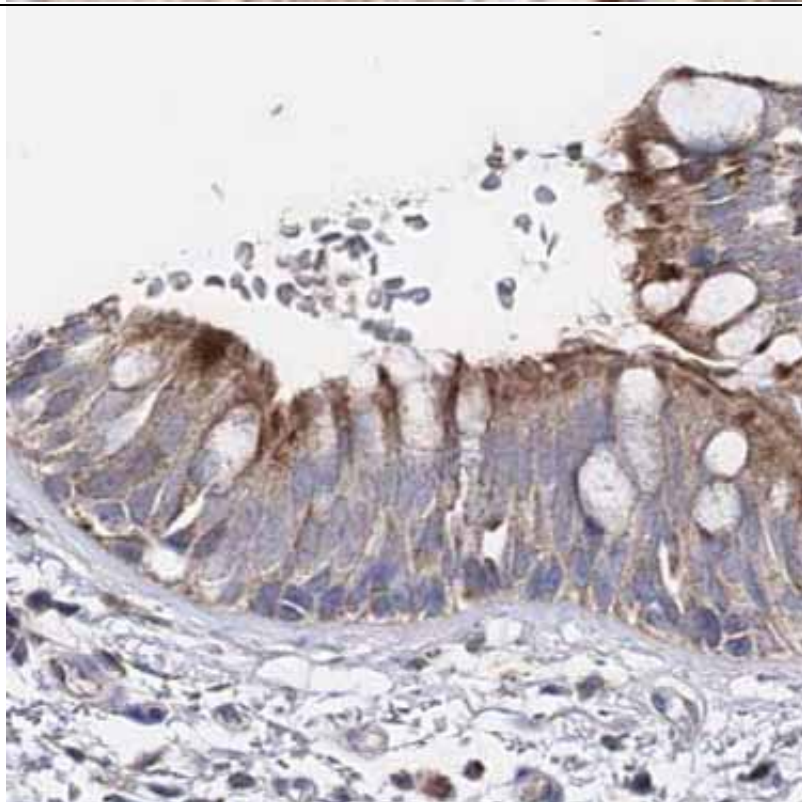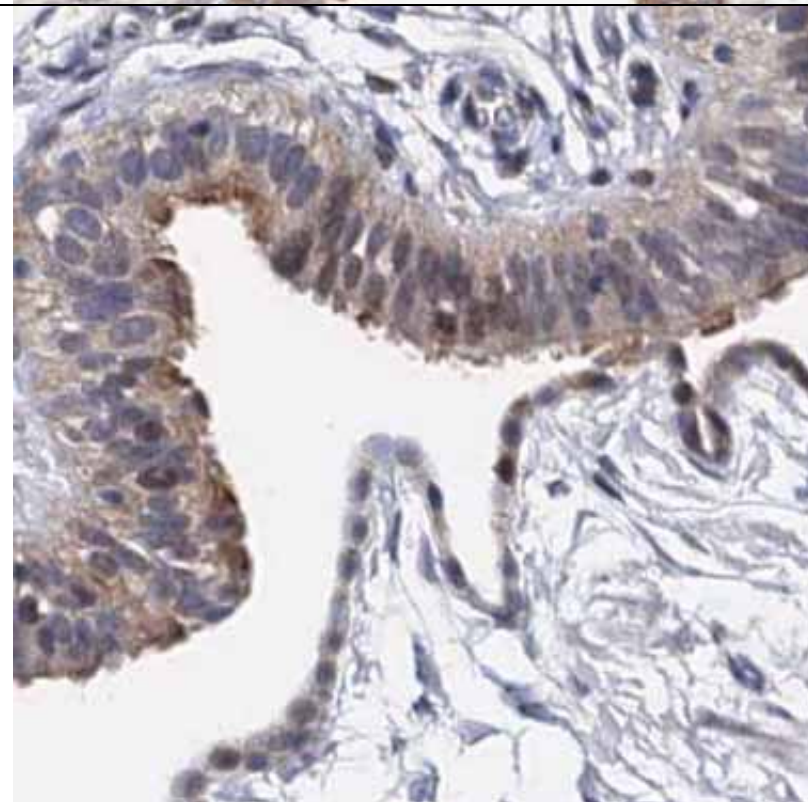

Staining is  
specific to  
*cilia*

C11orf63  
(antibody  
HPA039612)

Category 3

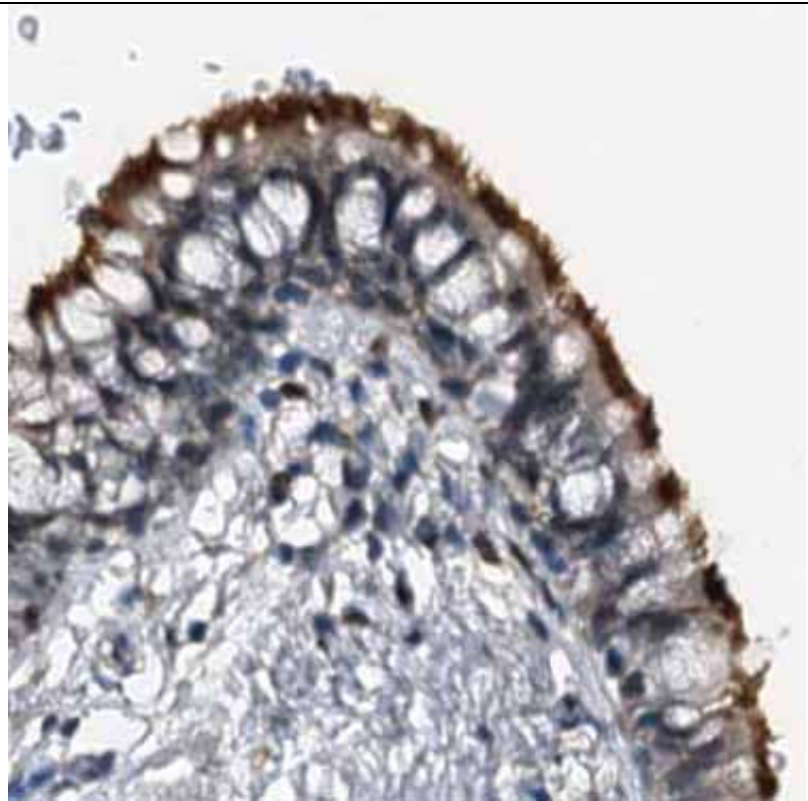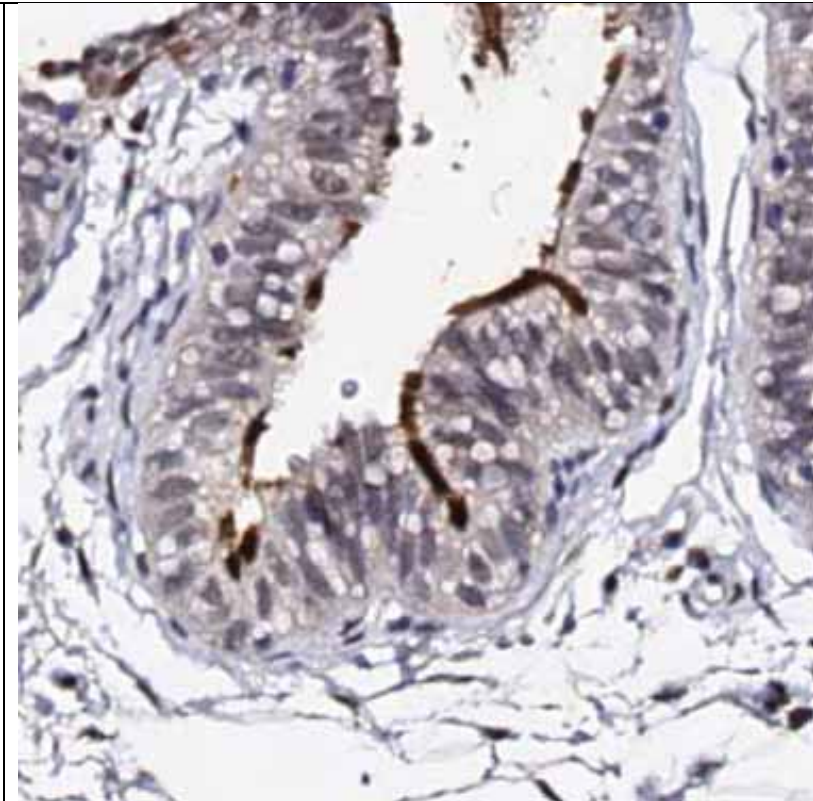

Staining is  
specific to  
*cilia*

C21orf58  
(antibody  
HPA035110)

Category 3

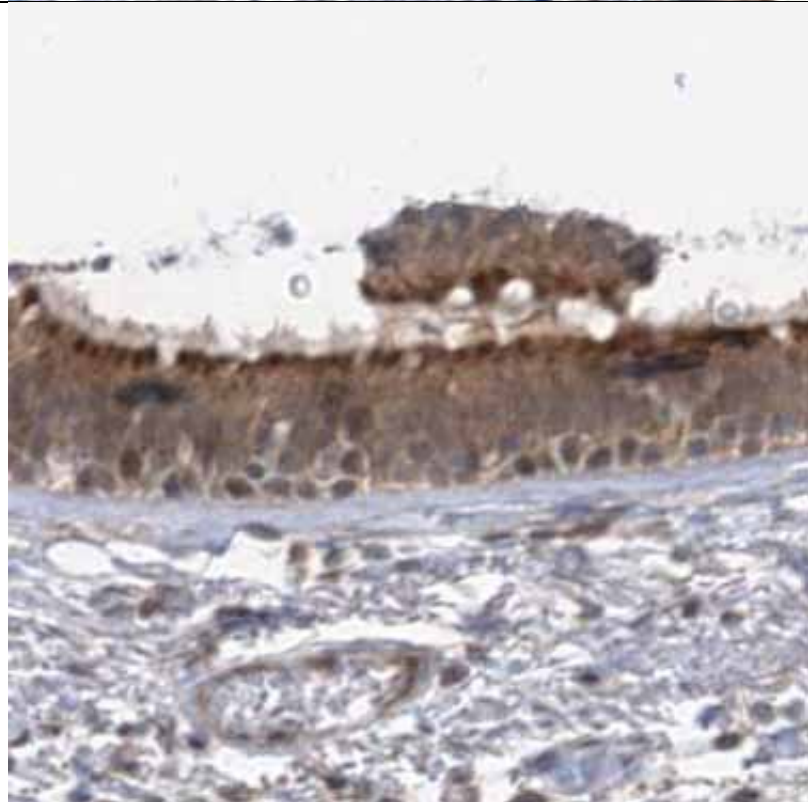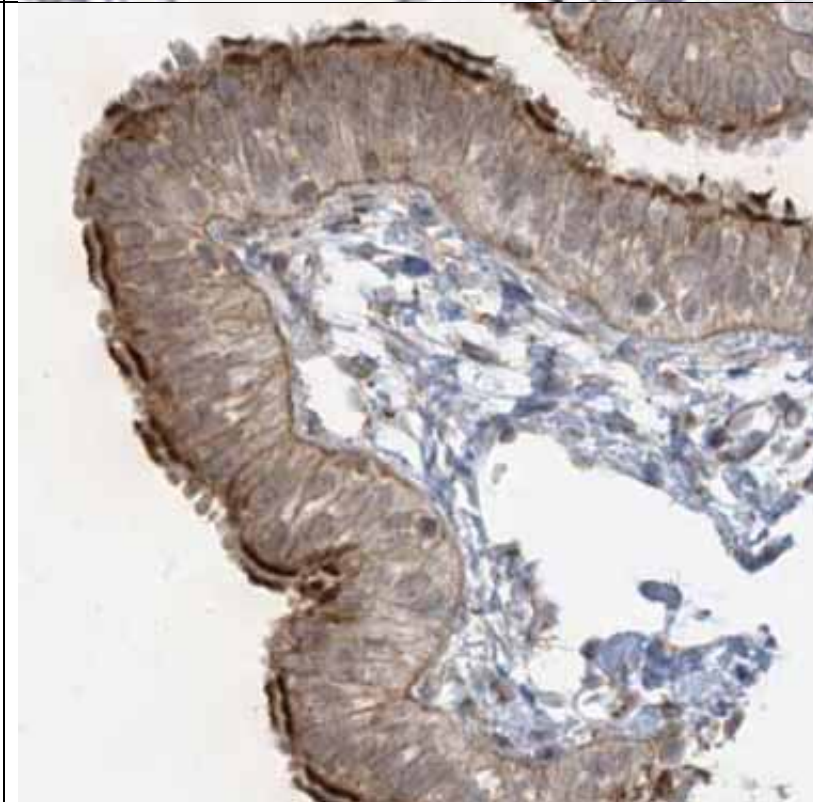

Staining is  
specific to  
*cilia*



C22orf23  
(antibody  
HPA001149)

Category 3

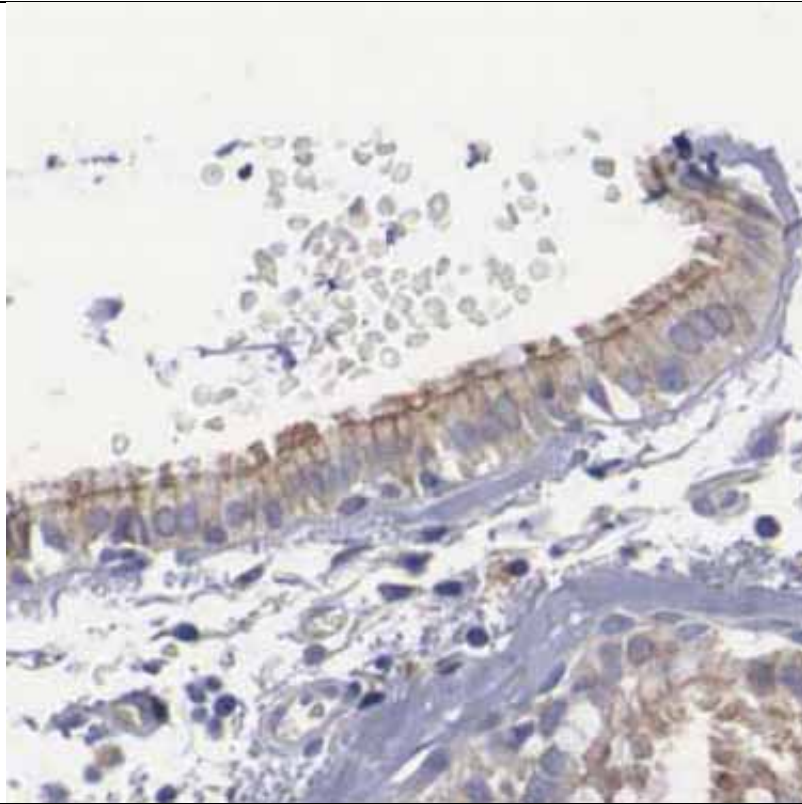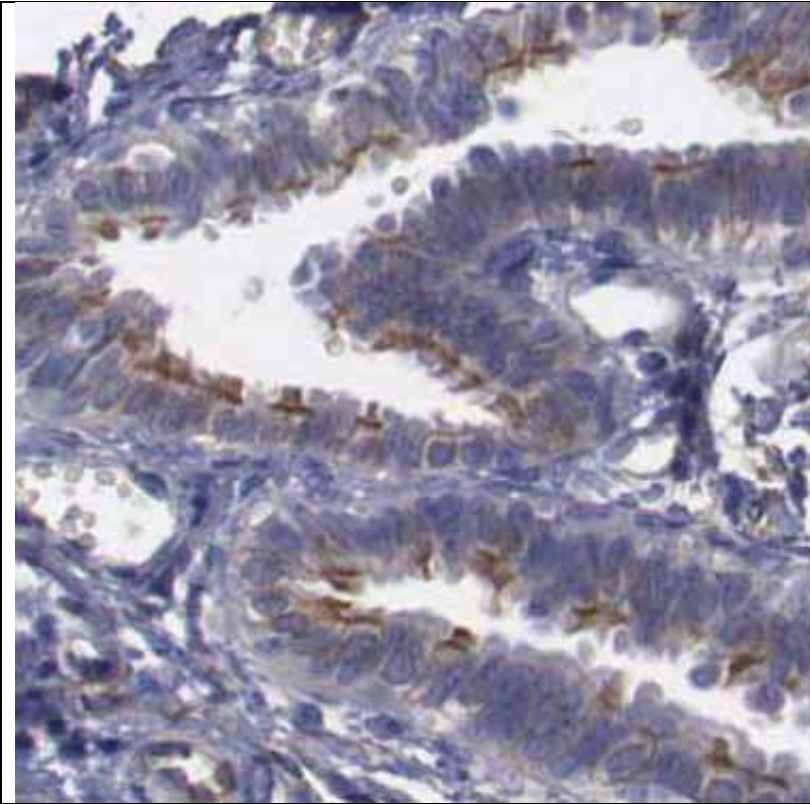

Staining is  
specific to  
*cilia*

CCDC89  
(antibody  
HPA039351)

Category 3

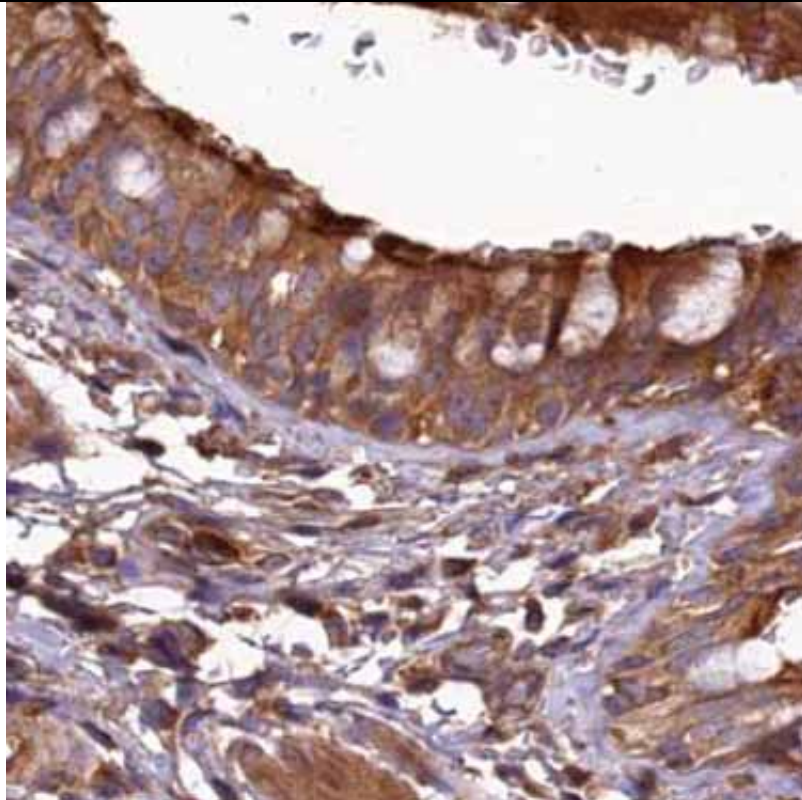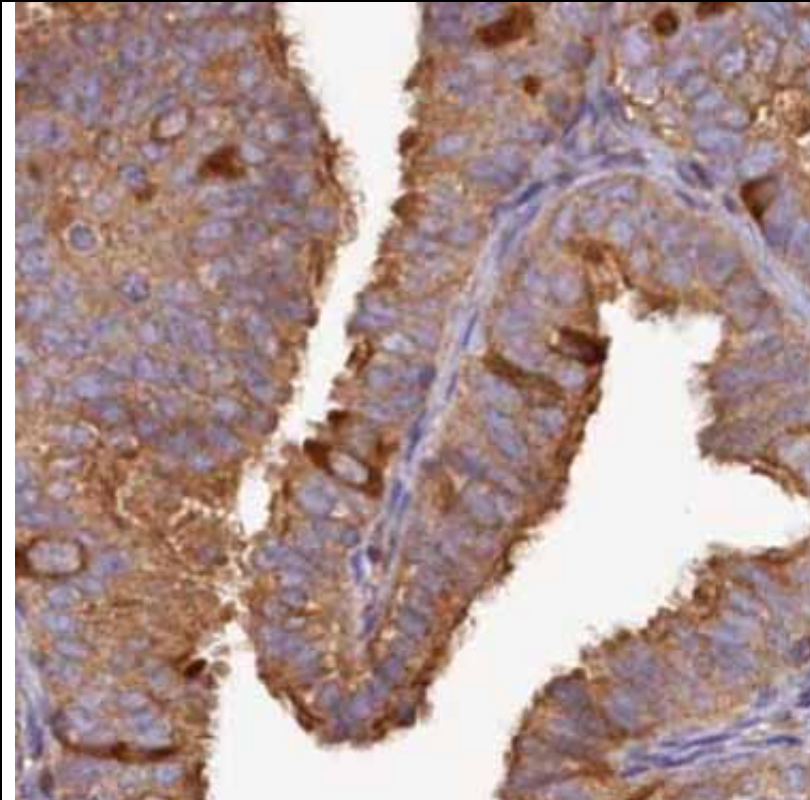

Staining is  
specific to  
*cilia*

CIB1  
(antibody  
CAB012991)

Category 3

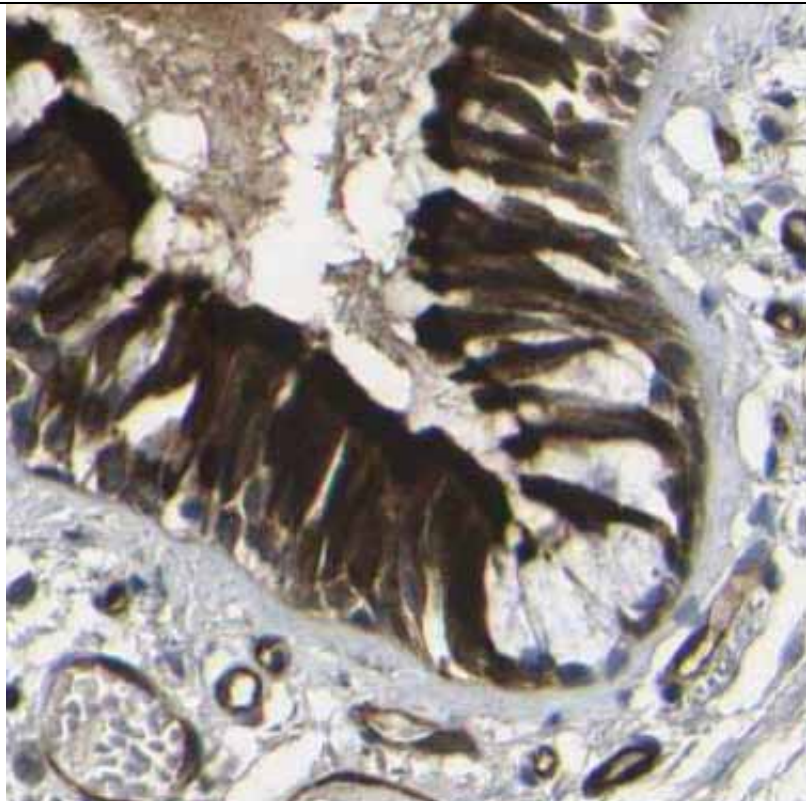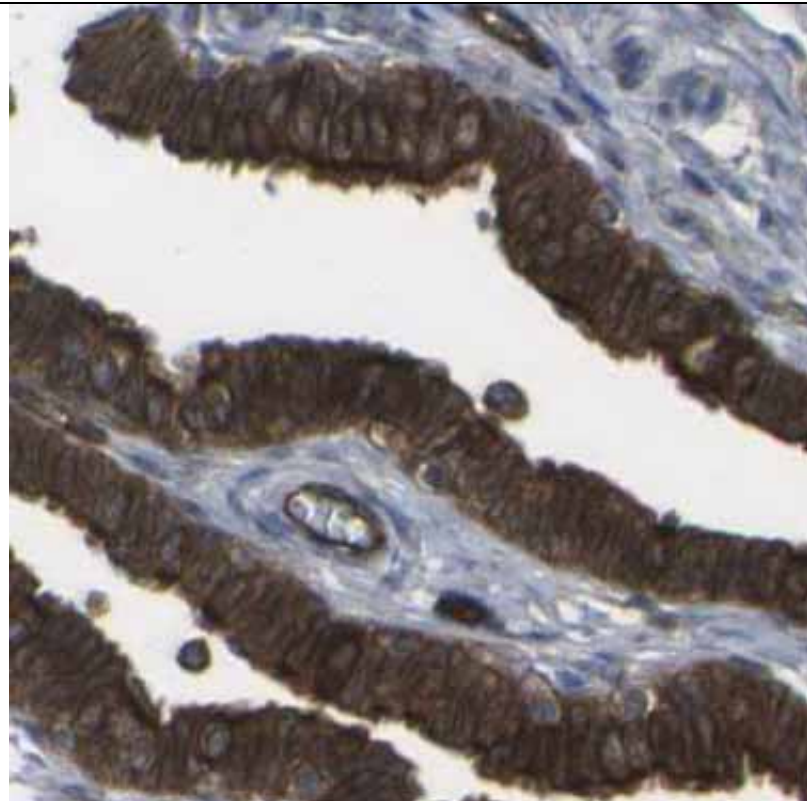

Staining is  
specific to  
*cilia*

IQCK  
(antibody  
HPA026792)

Category 3

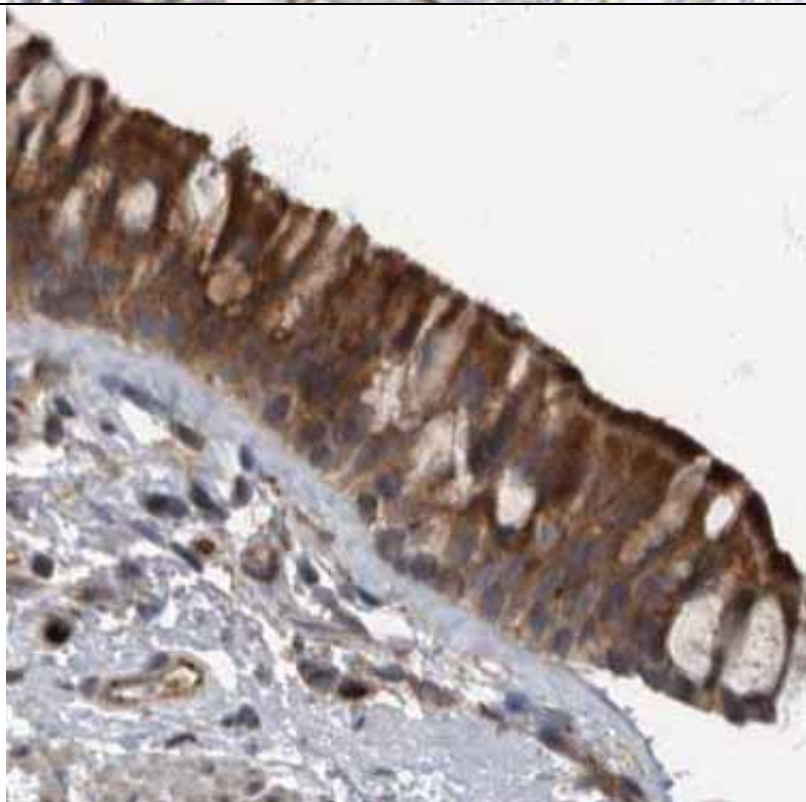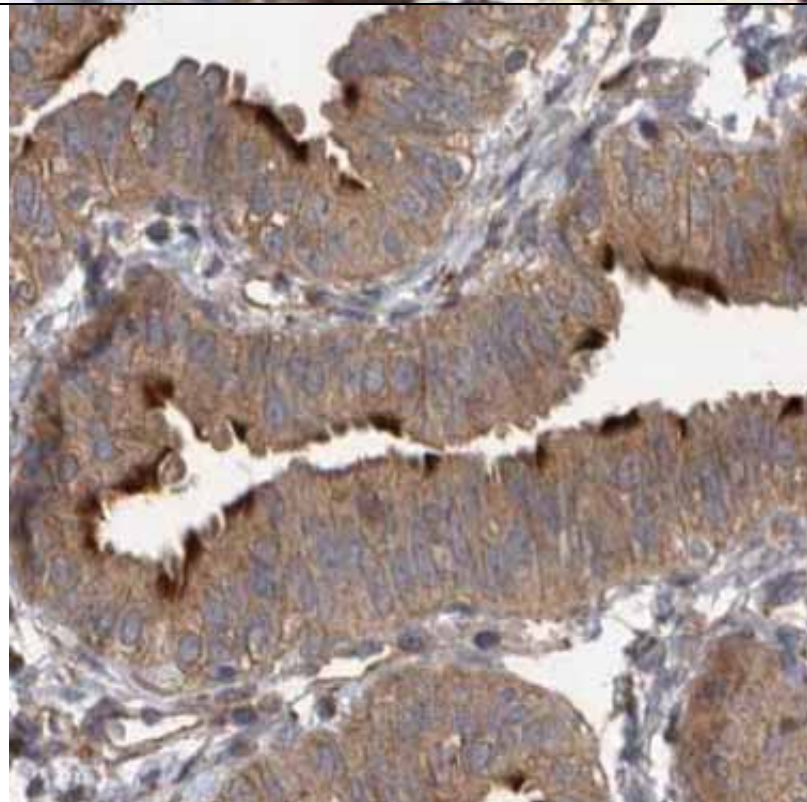

Staining is  
specific to  
*cilia*

KIAA0319  
(antibody  
HPA015607)

Category 3

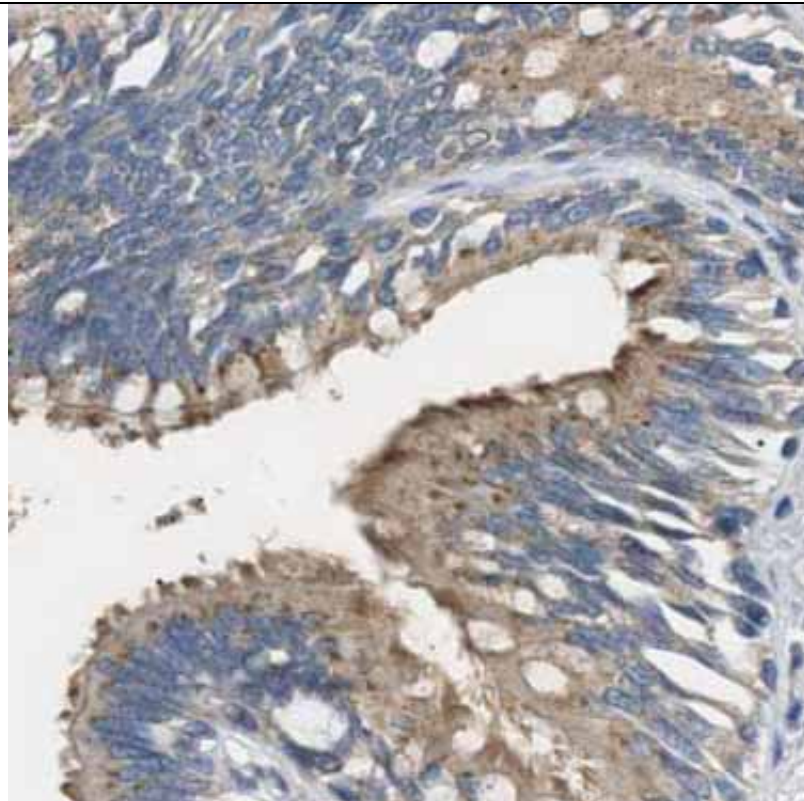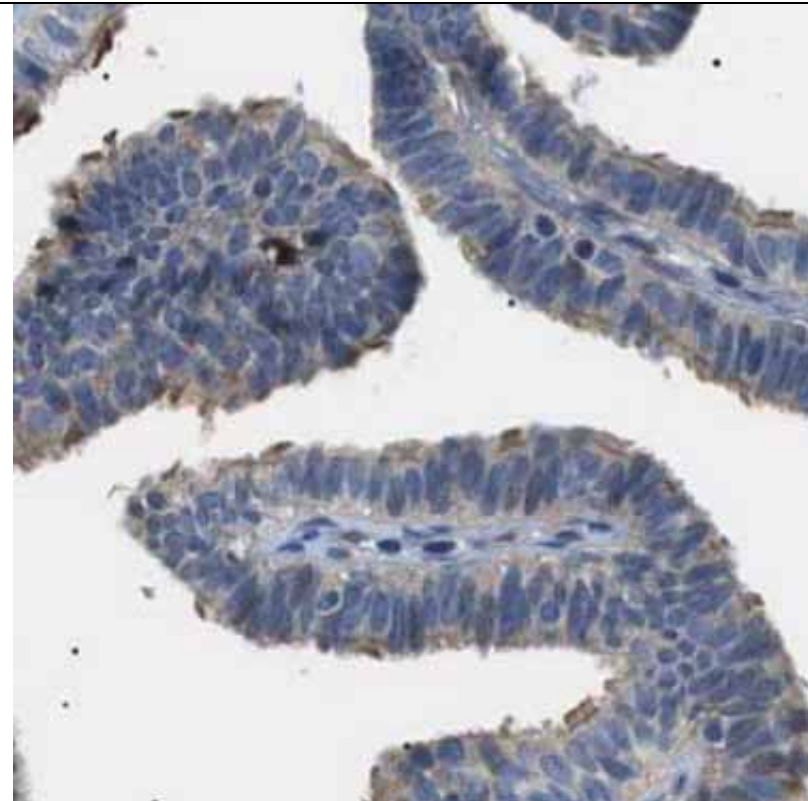

Staining is  
specific to  
*cilia*

LPAR3  
(antibody  
HPA013421)

Category 3

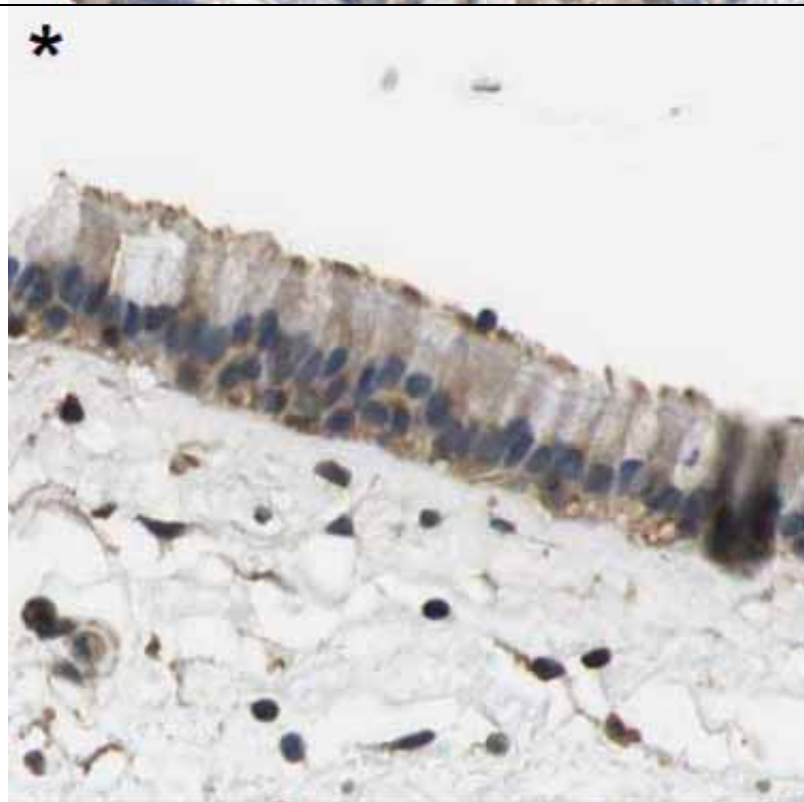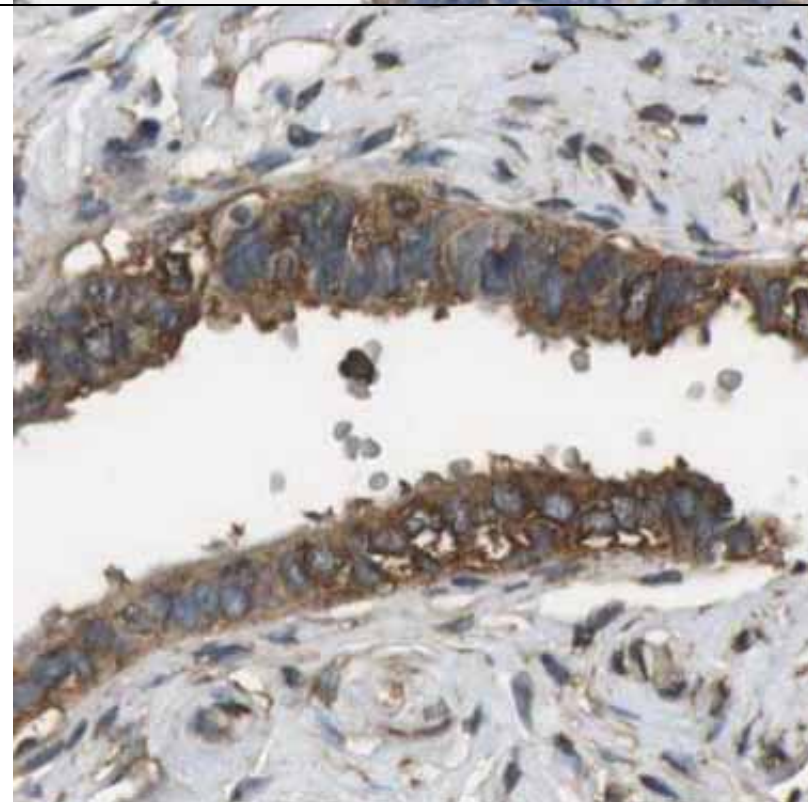

Staining is  
specific to  
*cilia*

LRGUK  
(antibody  
HPA029506)

Category 3

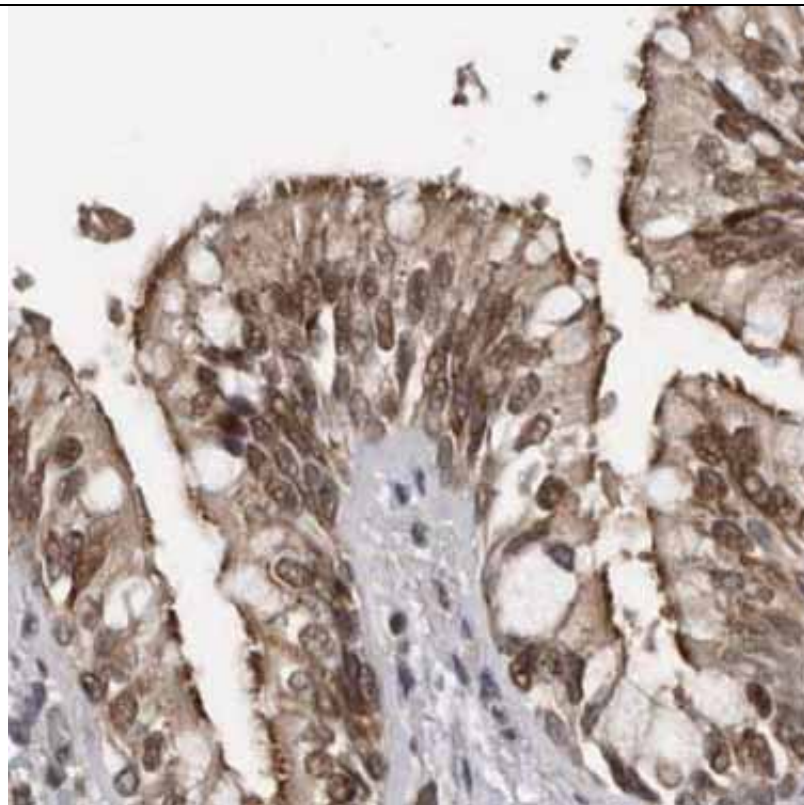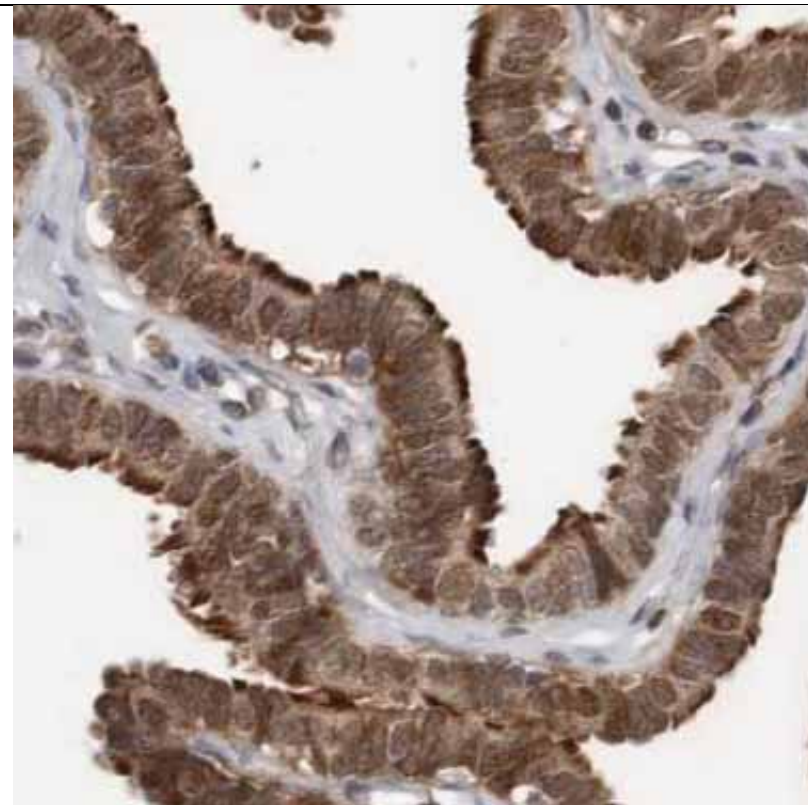

Staining is  
specific to  
*cilia*

LRRC18  
(antibody  
HPA039256)

Category 3

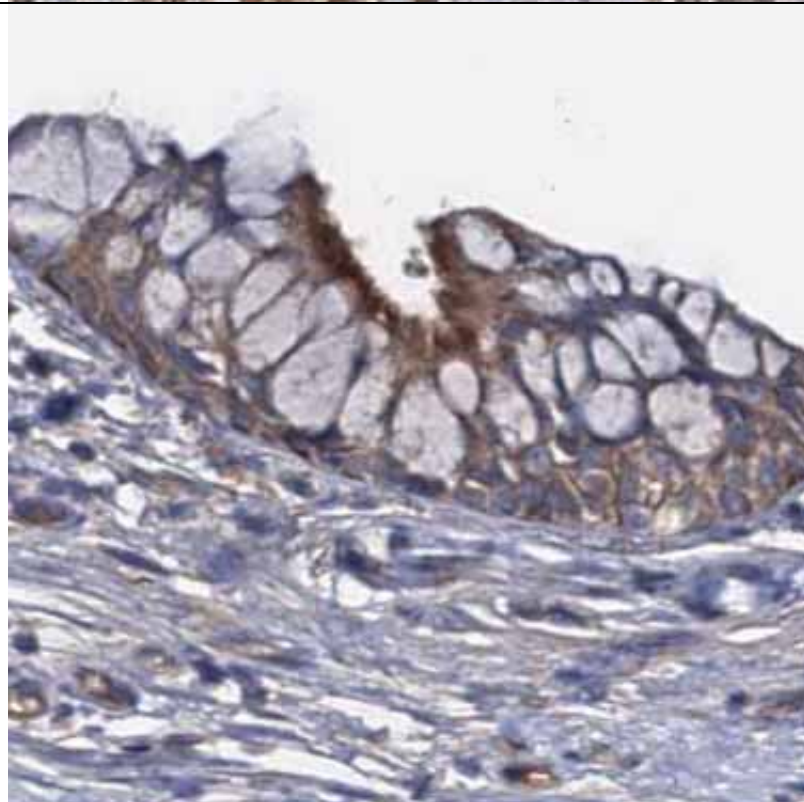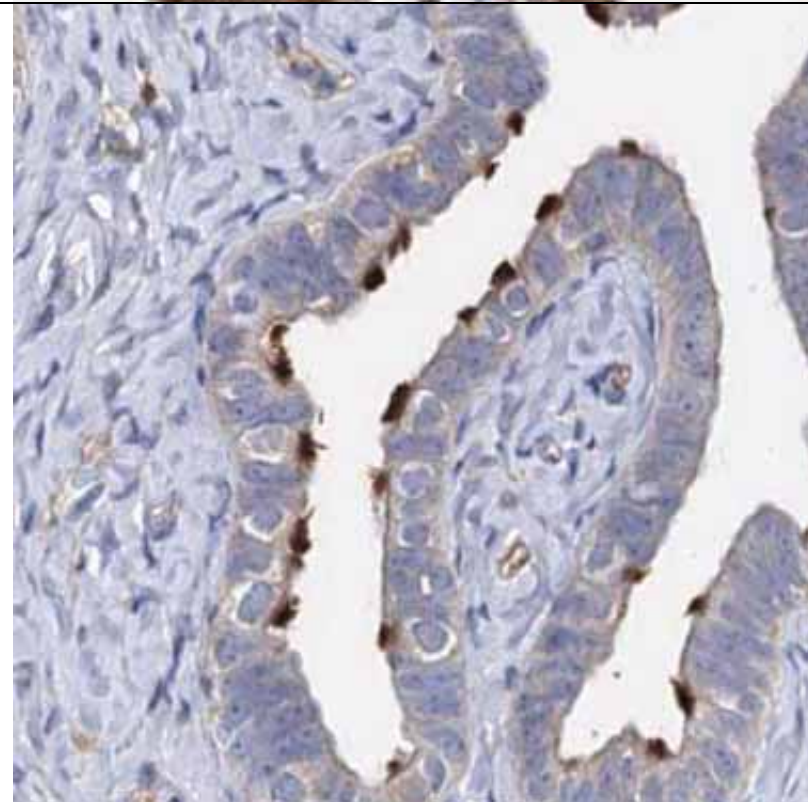

Staining is  
specific to  
*cilia*

LRR1Q3  
(antibody )

Category 3

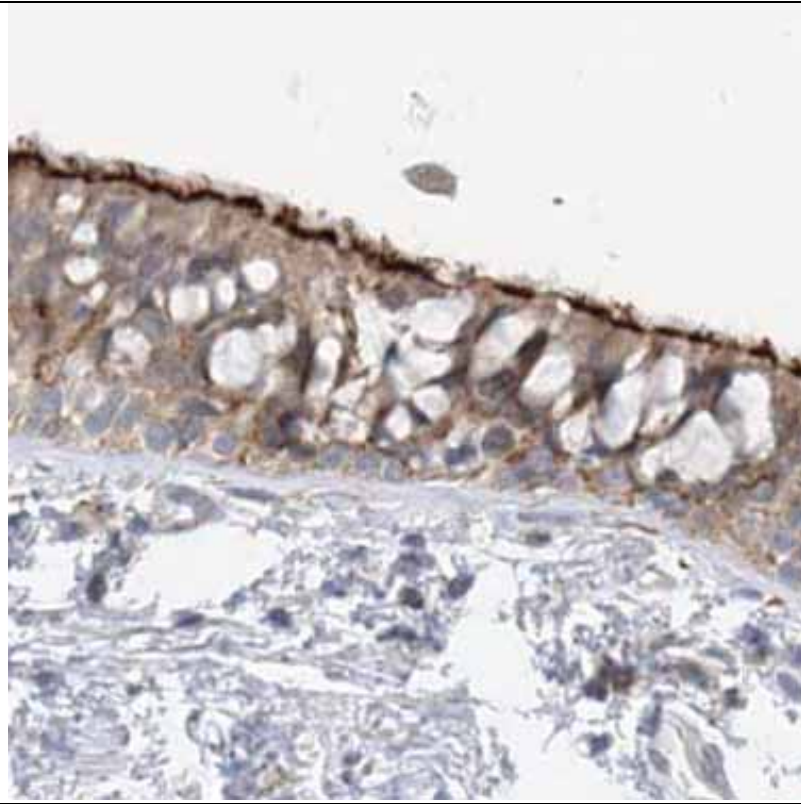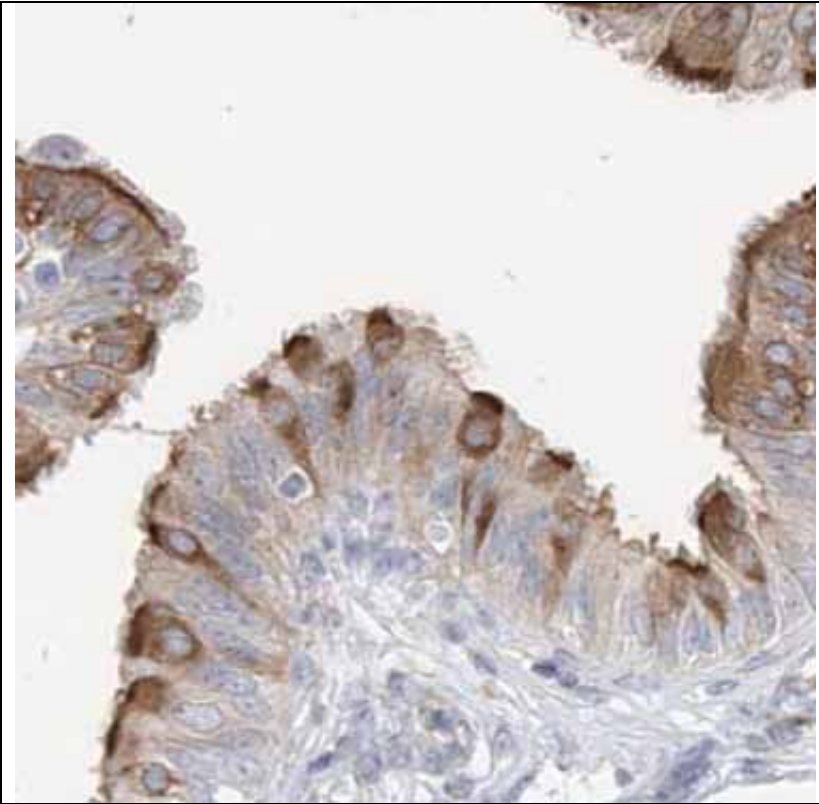

Staining is  
specific to  
*cilia*

NUP62CL  
(antibody  
HPA001884)

Category 3

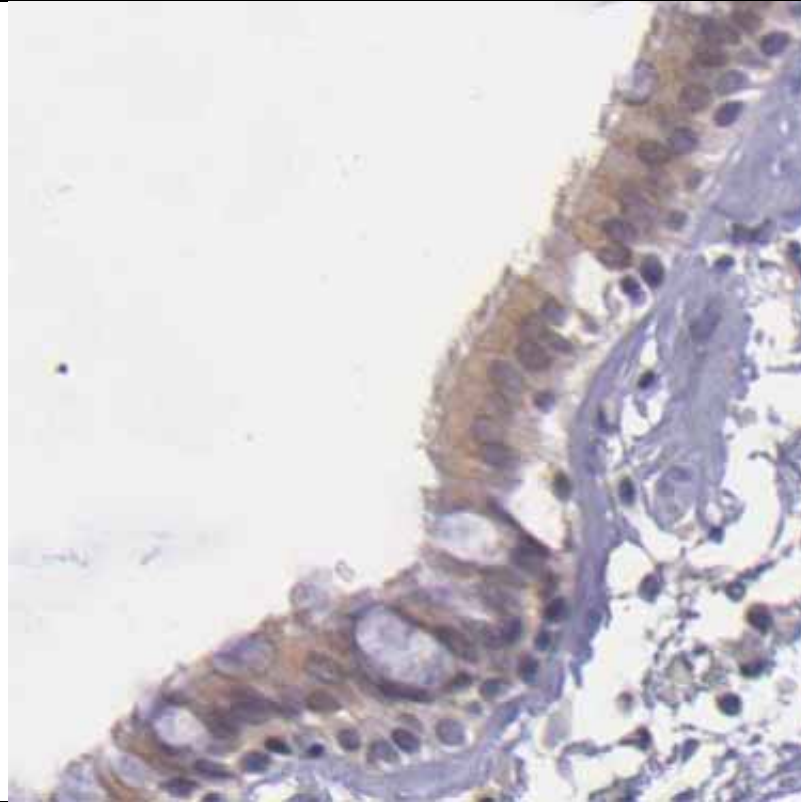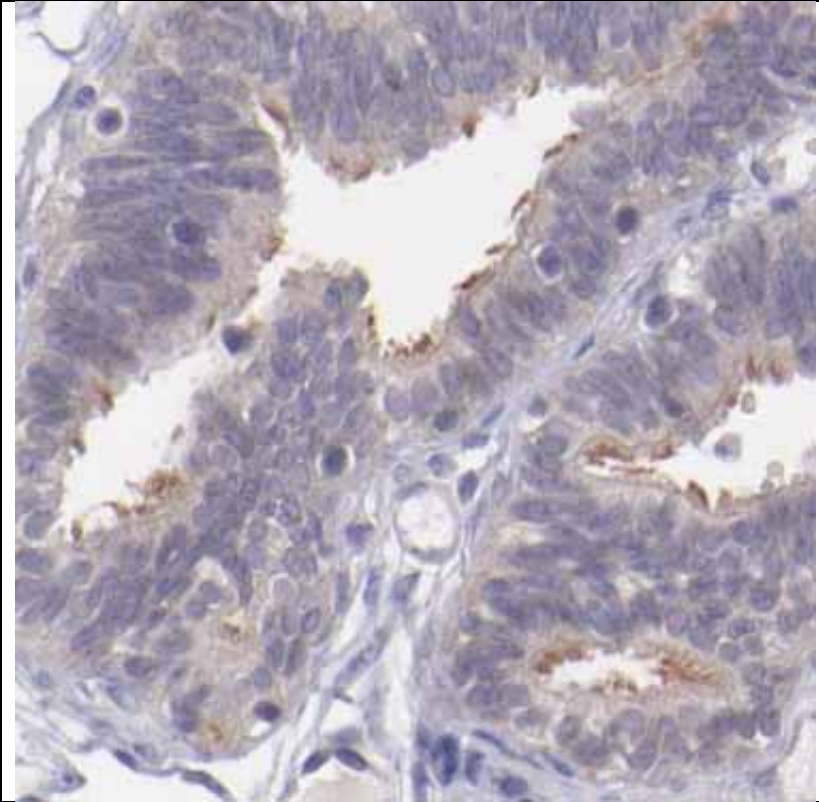

Staining is  
specific to  
*cilia*

PPM1E  
(antibody  
HPA019263)

Category 3

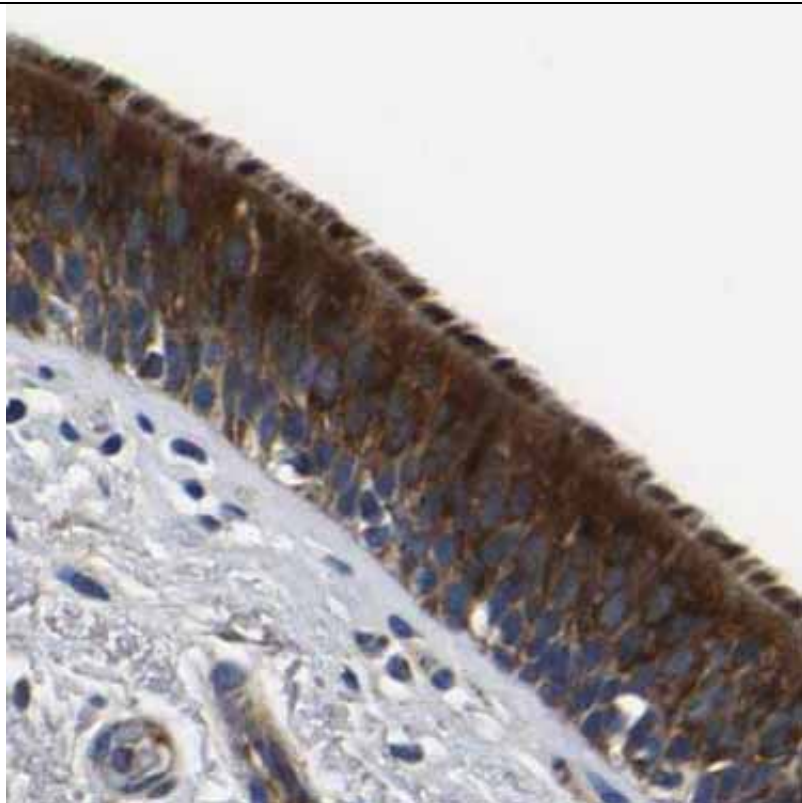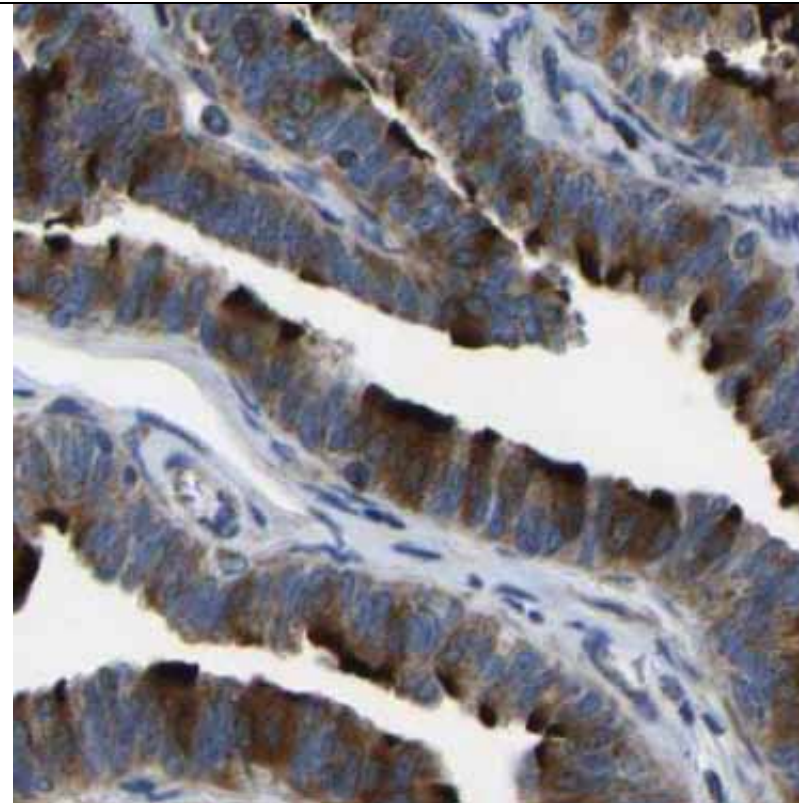

Staining is  
specific to  
*cilia*

RBM20  
(antibody  
HPA035806)

Category 3

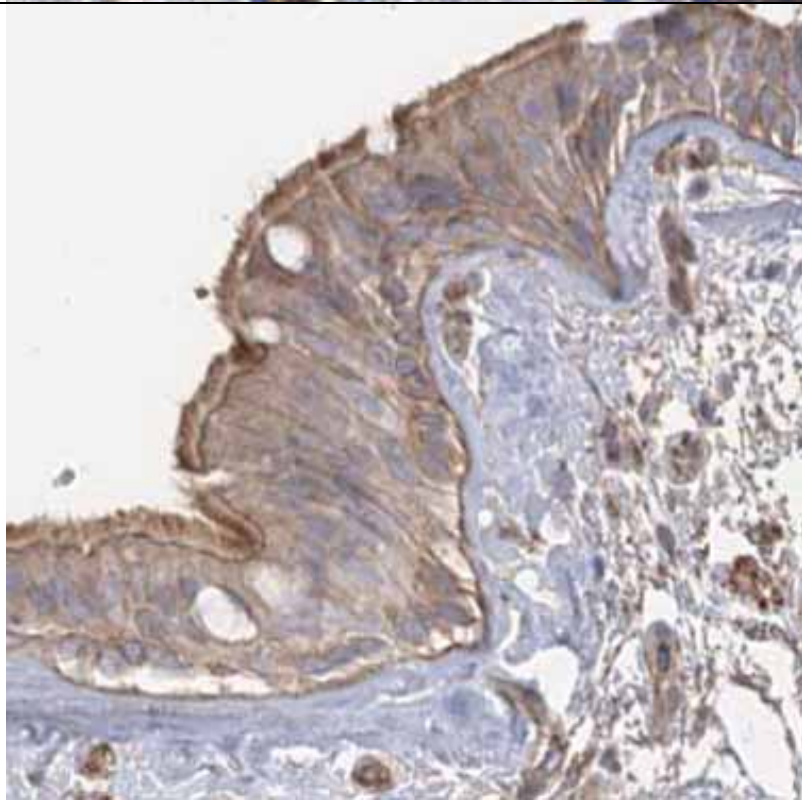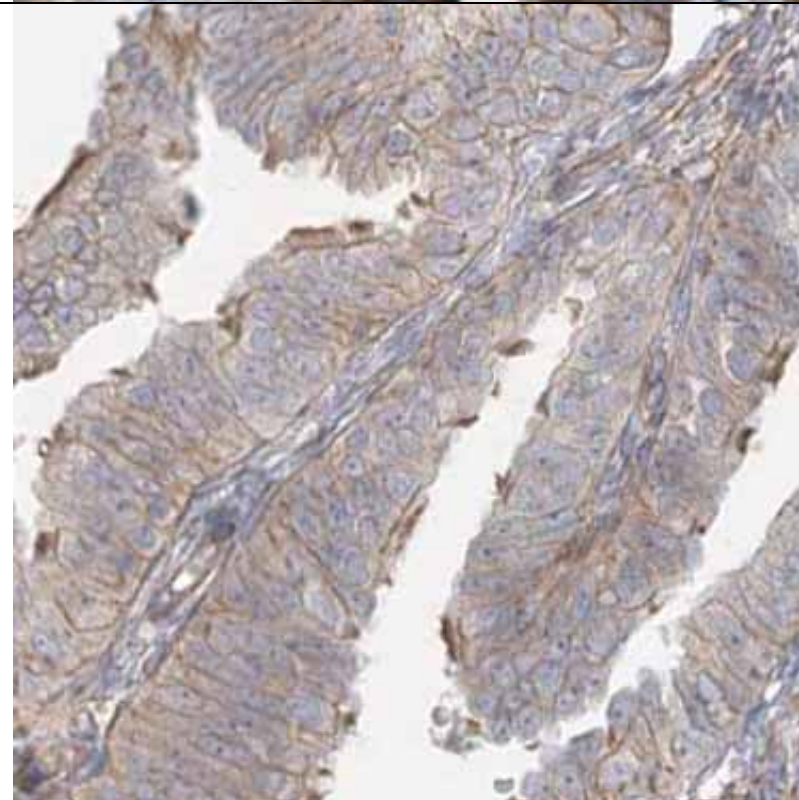

Staining is  
specific to  
*cilia*

RGS22  
(antibody  
HPA023118)

Category 3

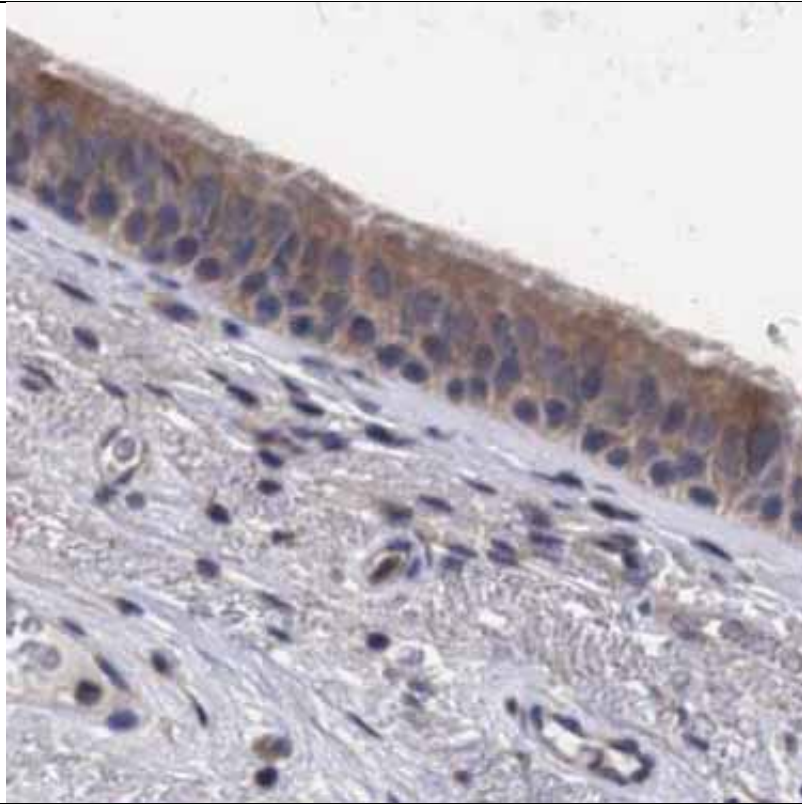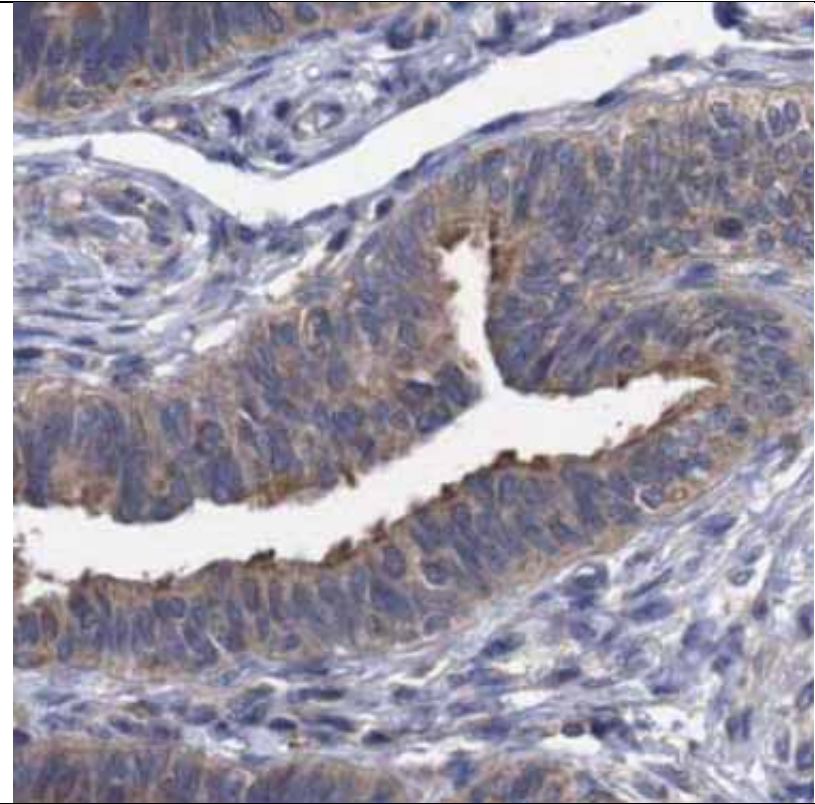

Staining is  
specific to  
*cilia*

UFC1  
(antibody  
HPA028722)

Category 3

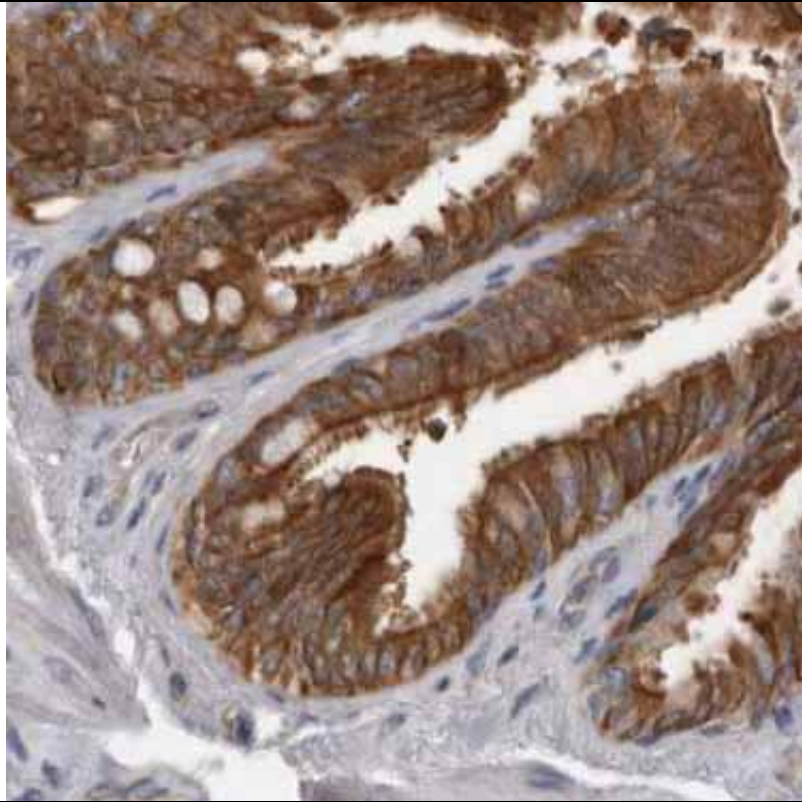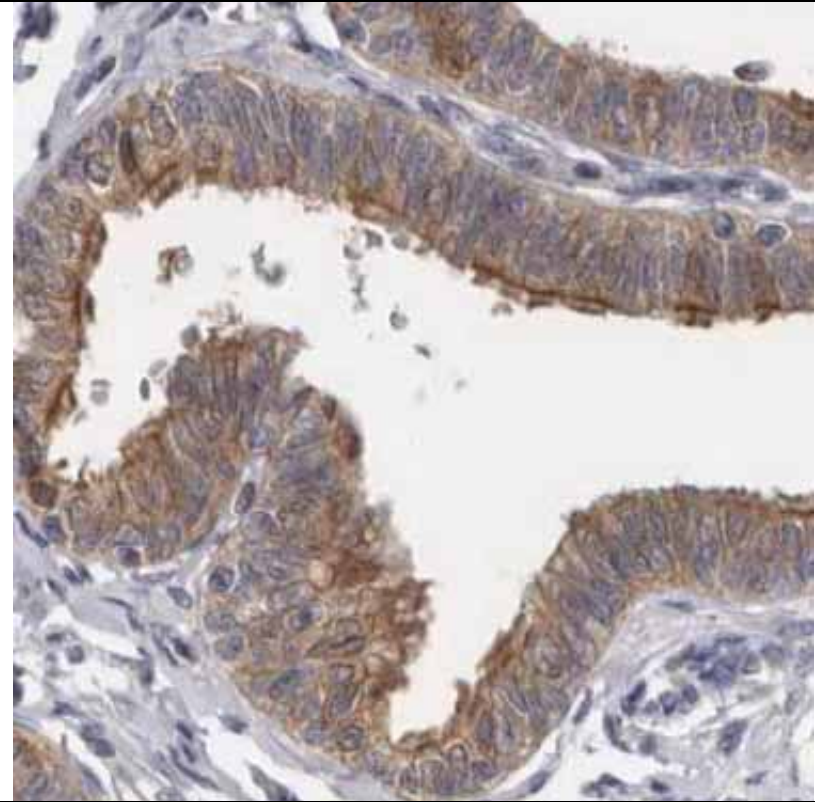

Staining is  
specific to  
*cilia*

ACYP1  
(antibody  
HPA034944)

Category 3

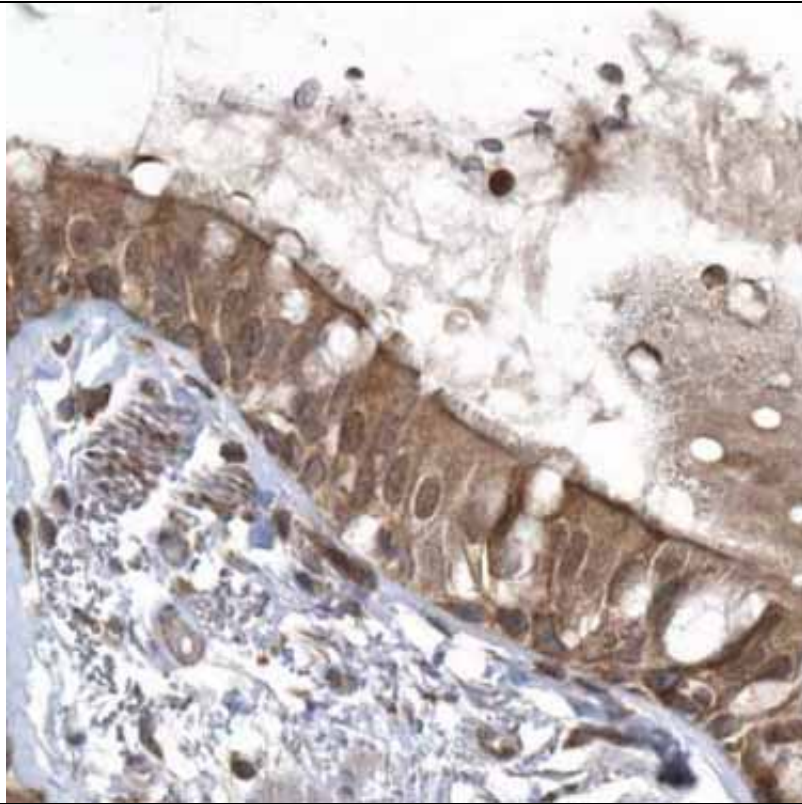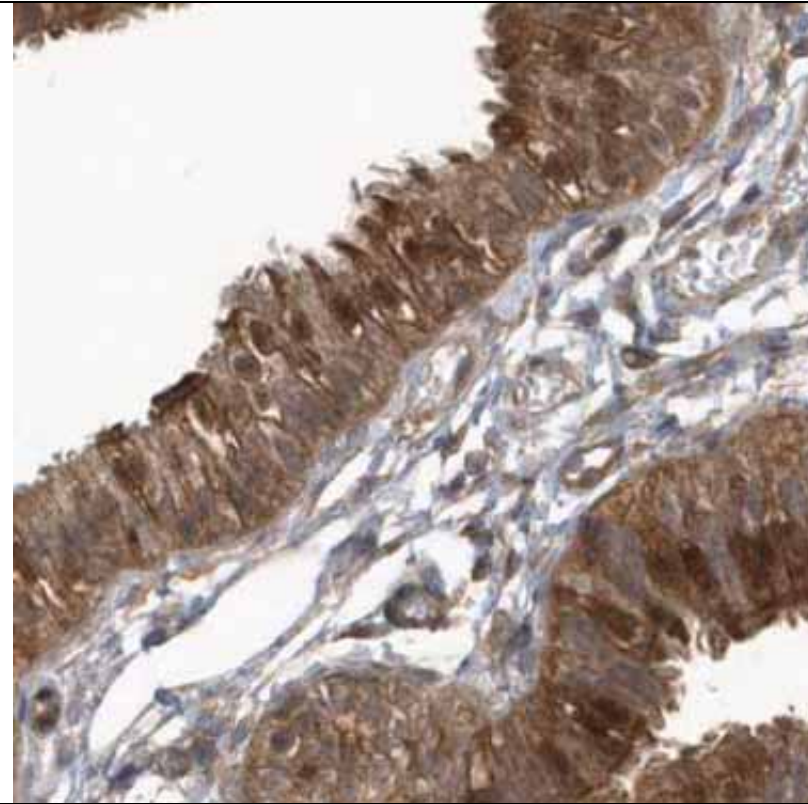

Staining is  
specific to  
*ciliated cells*  
(uncertain  
subcellular  
localization)

C1orf129  
(antibody  
HPA028413)

Category 3

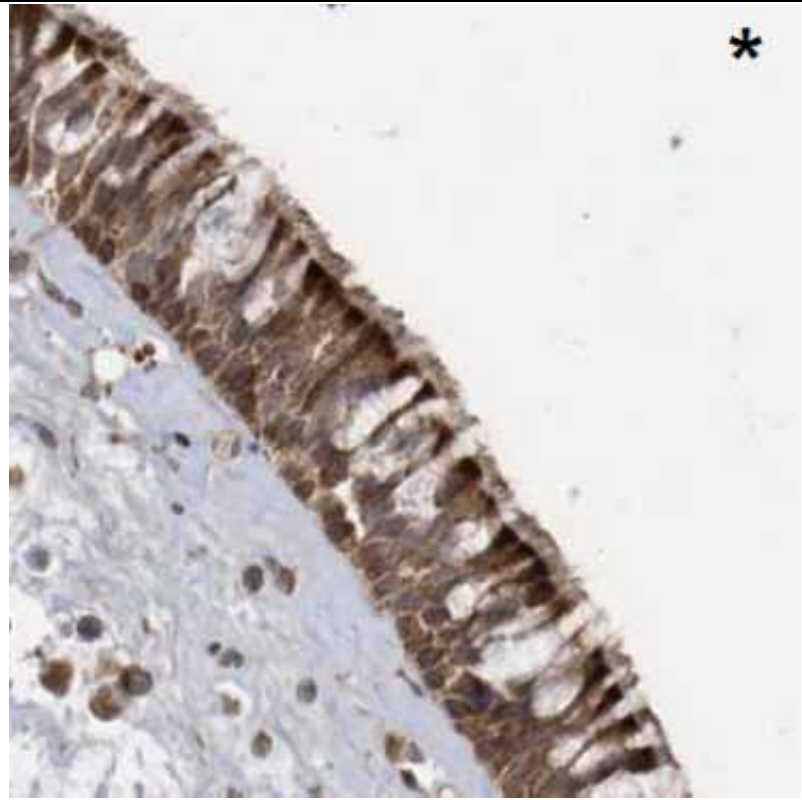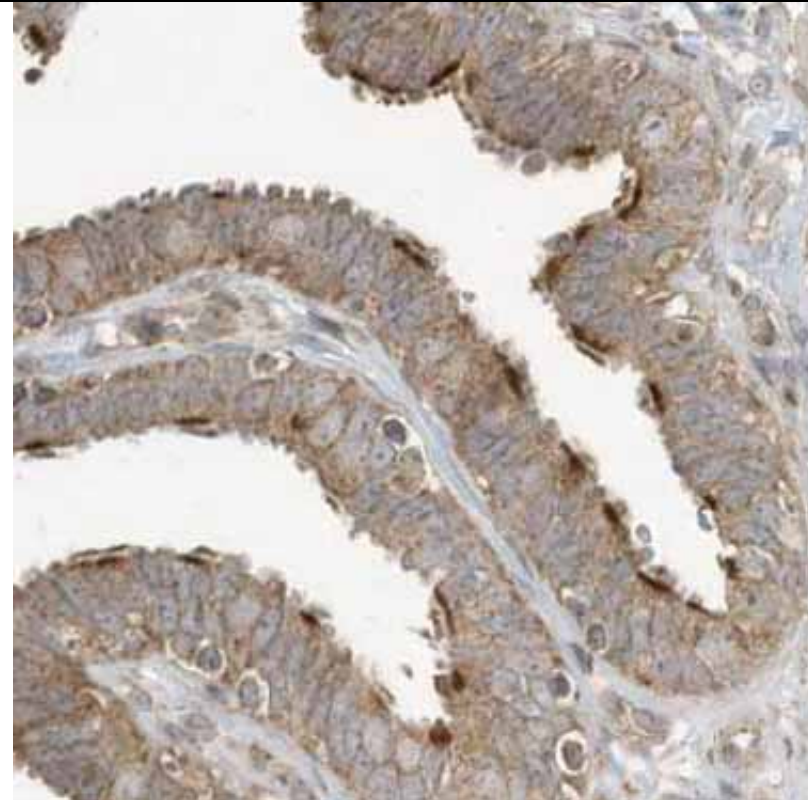

Staining is  
specific to  
*ciliated cells*  
(apical  
cytoplasm)



DCDC5  
(antibody  
HPA039014)

Category 3

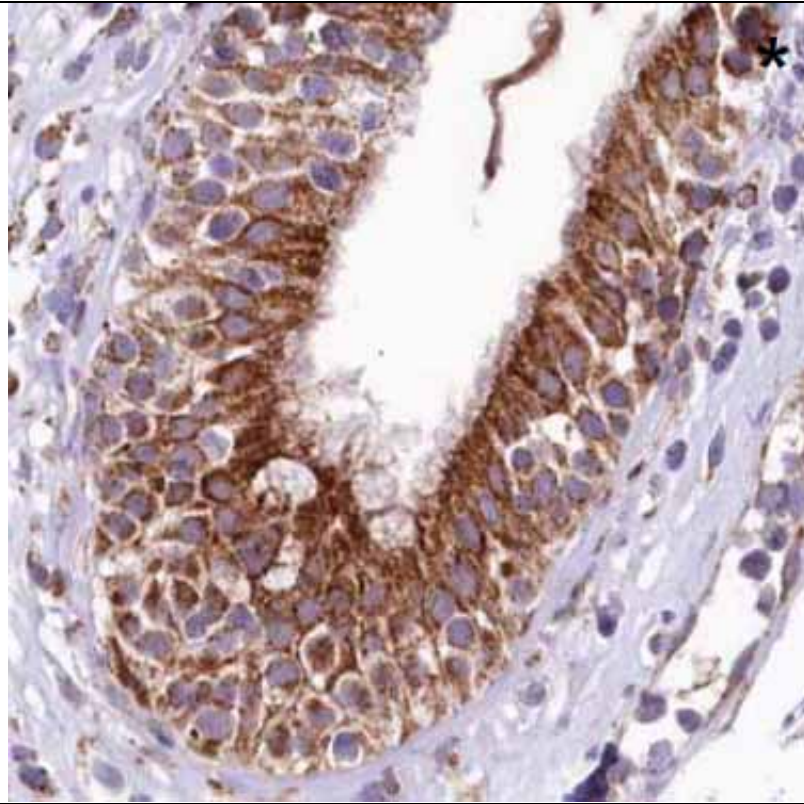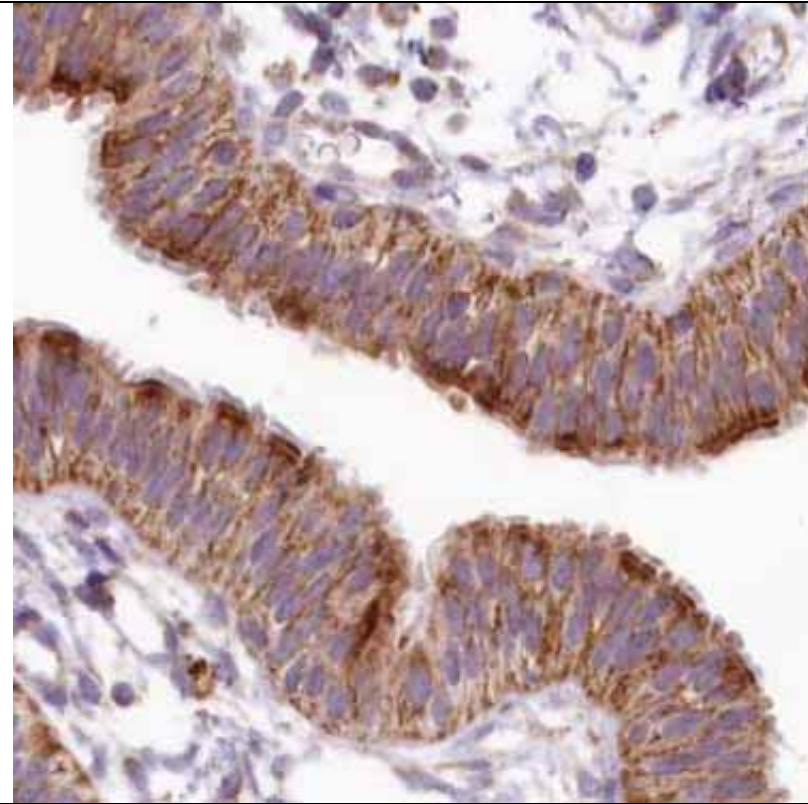

Staining is  
specific to  
*ciliated cells*  
(apical  
cytoplasm)

FLJ16686  
(antibody  
HPA037761)

Category 3

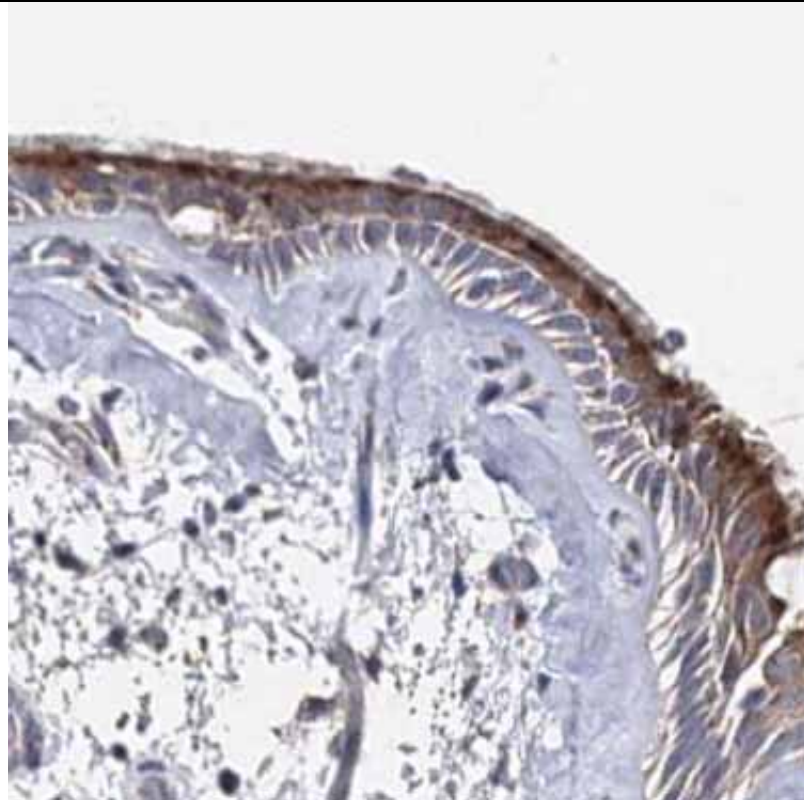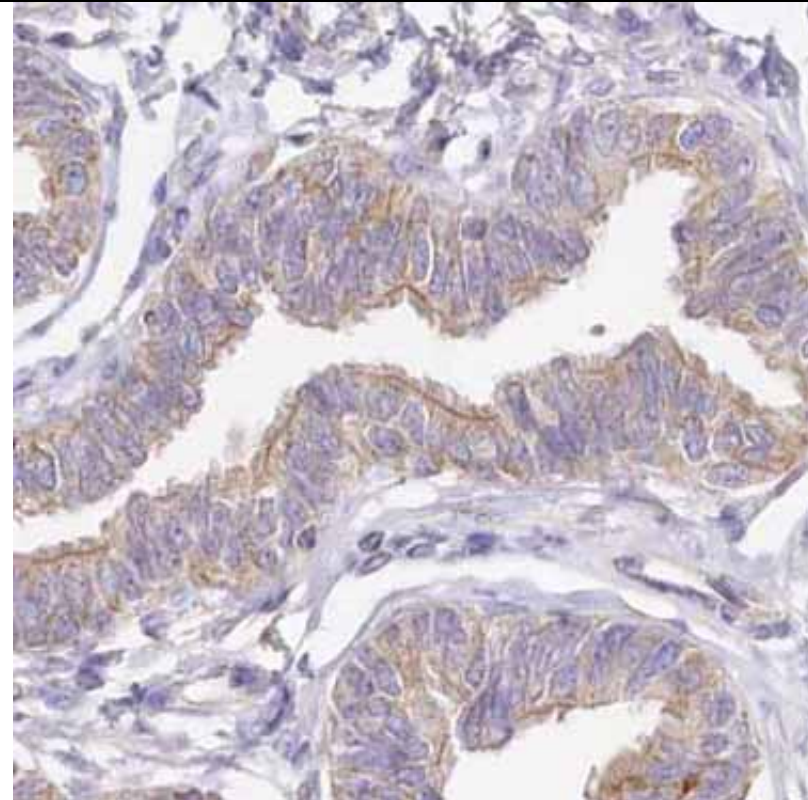

Staining is  
specific to  
*ciliated cells*  
(apical  
cytoplasm)

SYTL3  
(antibody  
HPA030586)

Category 3

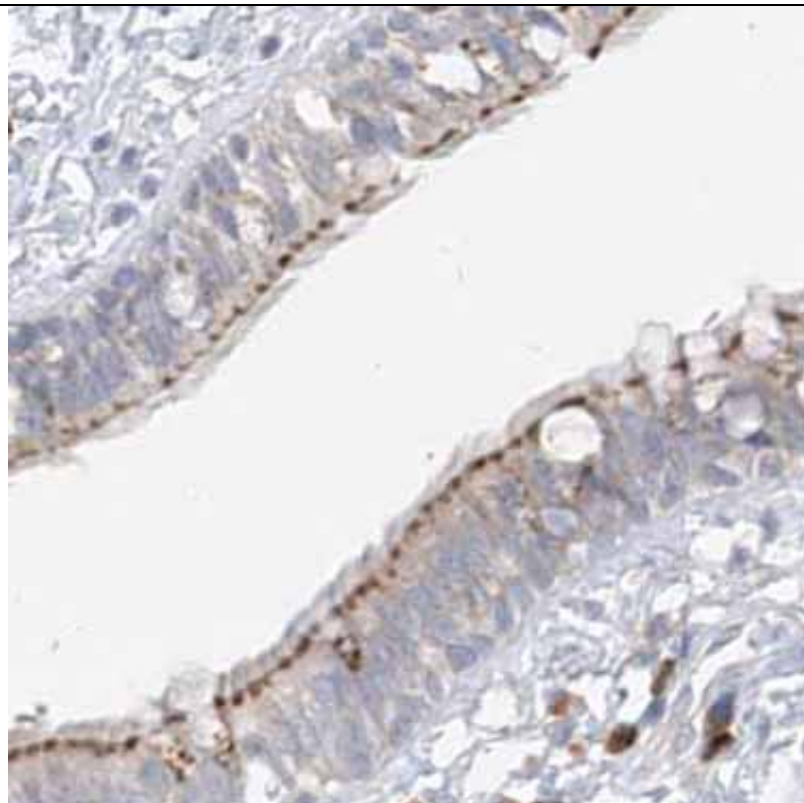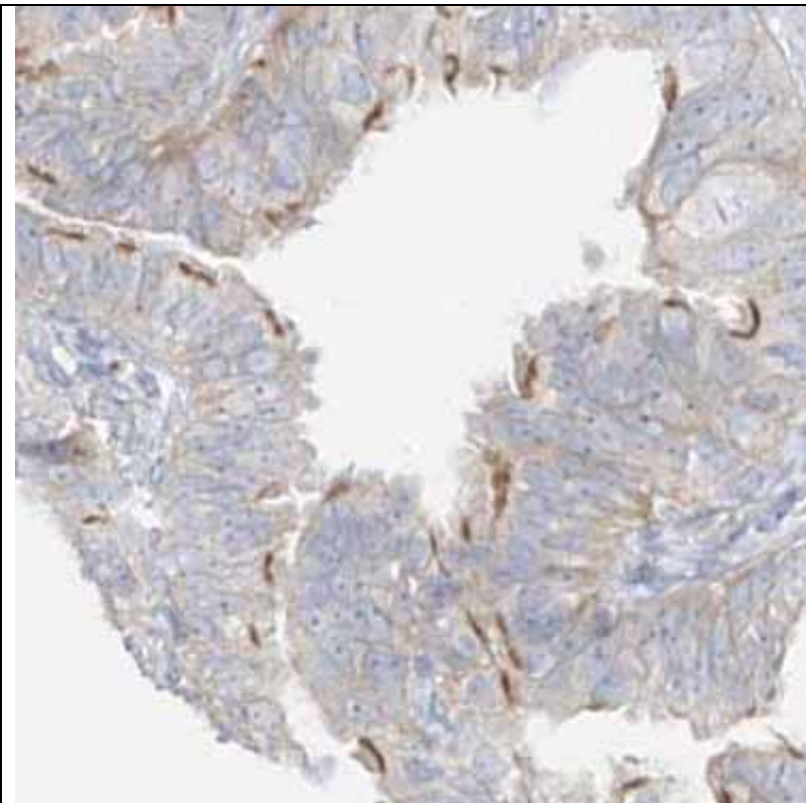

Staining is  
specific to  
*ciliated cells*  
(apical  
cytoplasm)

ALS2CR12  
(antibody  
HPA035793)

Category 3

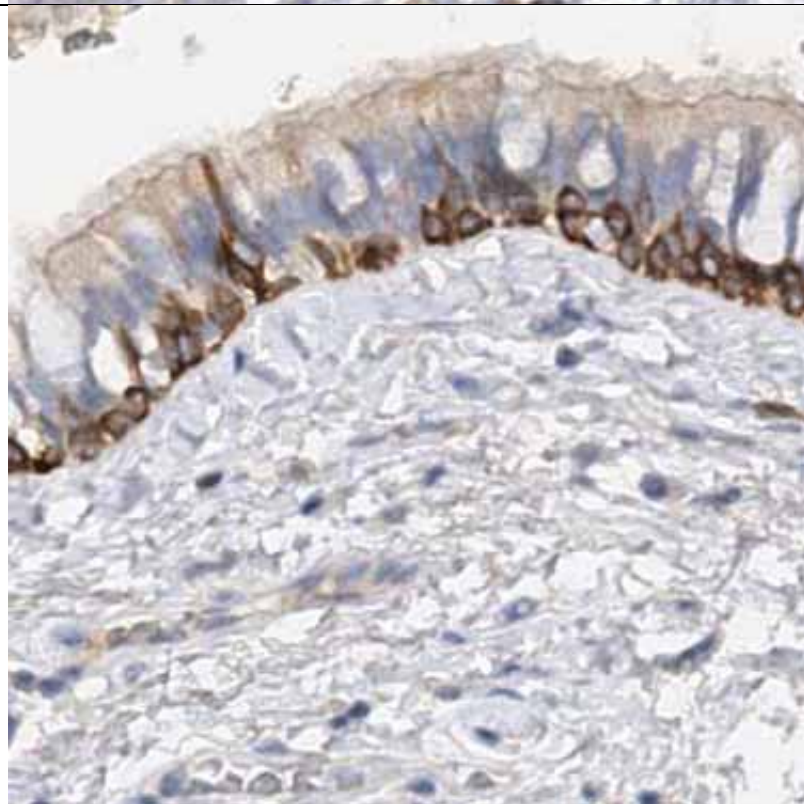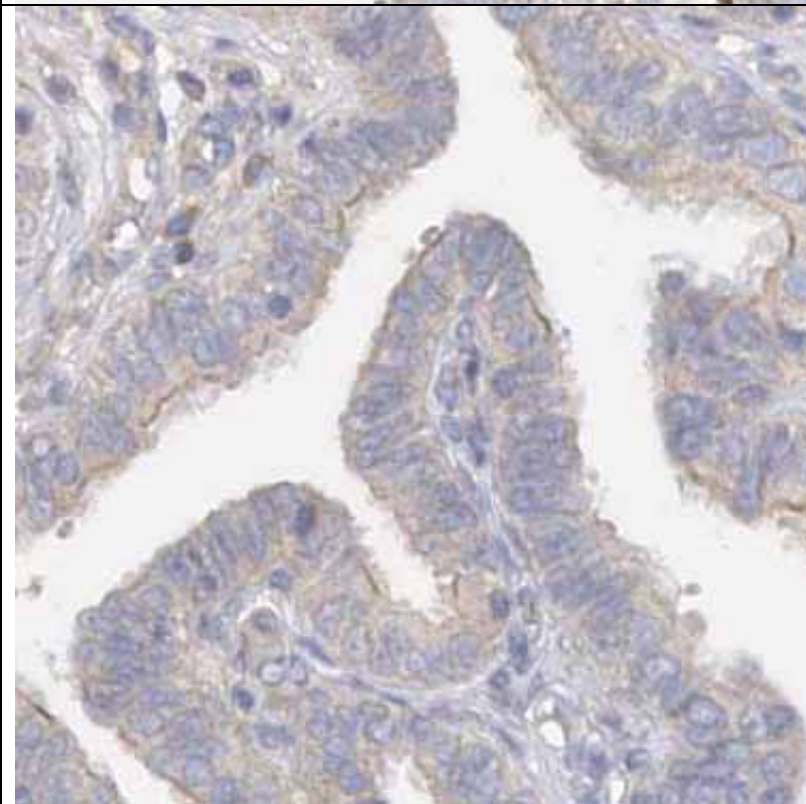

Staining is  
non-specific  
to ciliated  
cells or  
absent

ANKFN1  
(antibody  
HPA021566)

Category 3

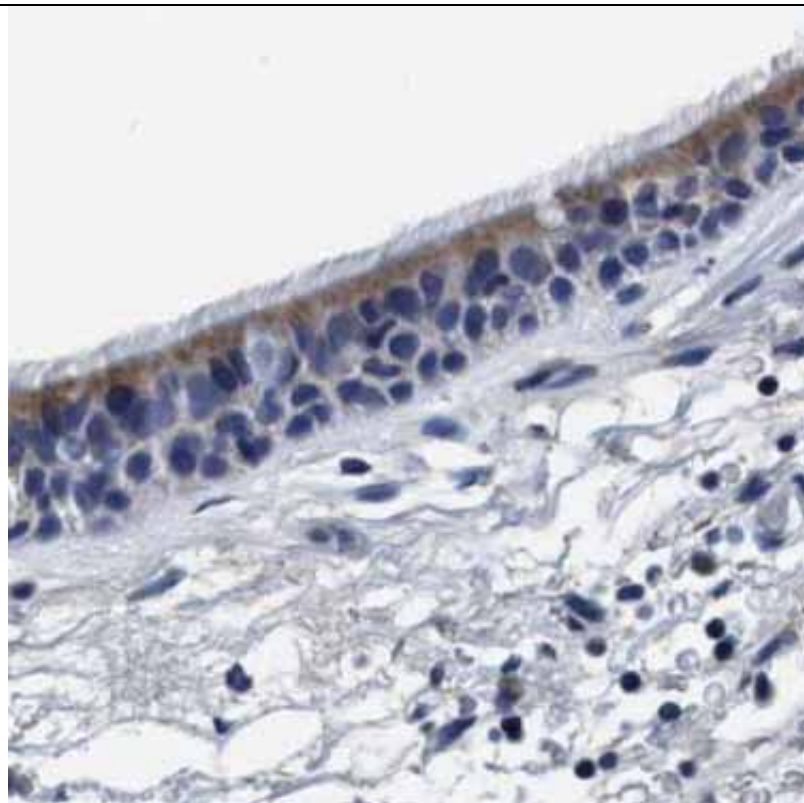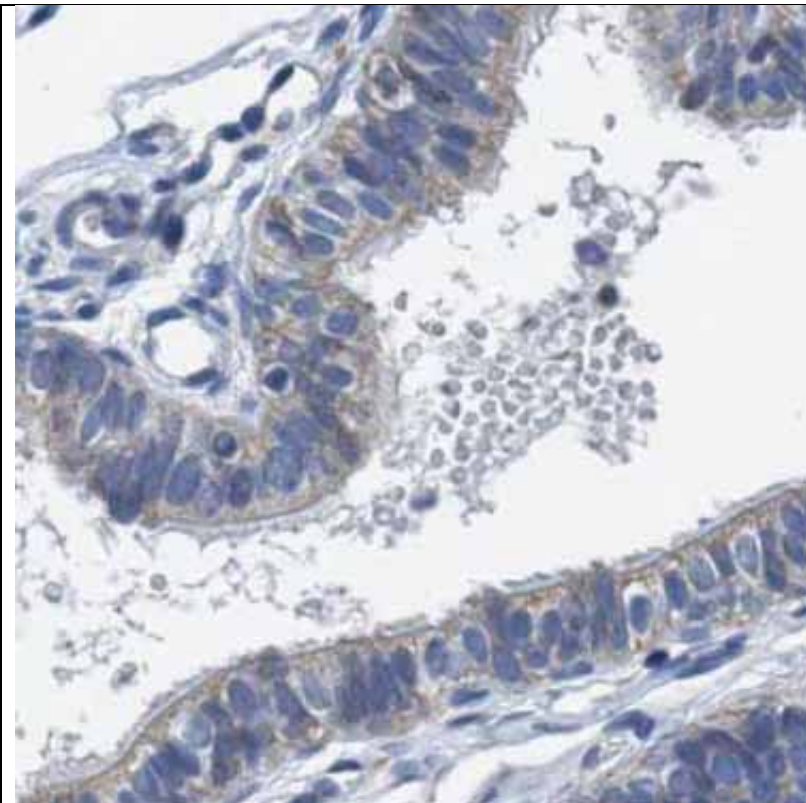

Staining is  
non-specific  
to ciliated  
cells or  
absent

CCDC67  
(antibody  
HPA010986)

Category 3

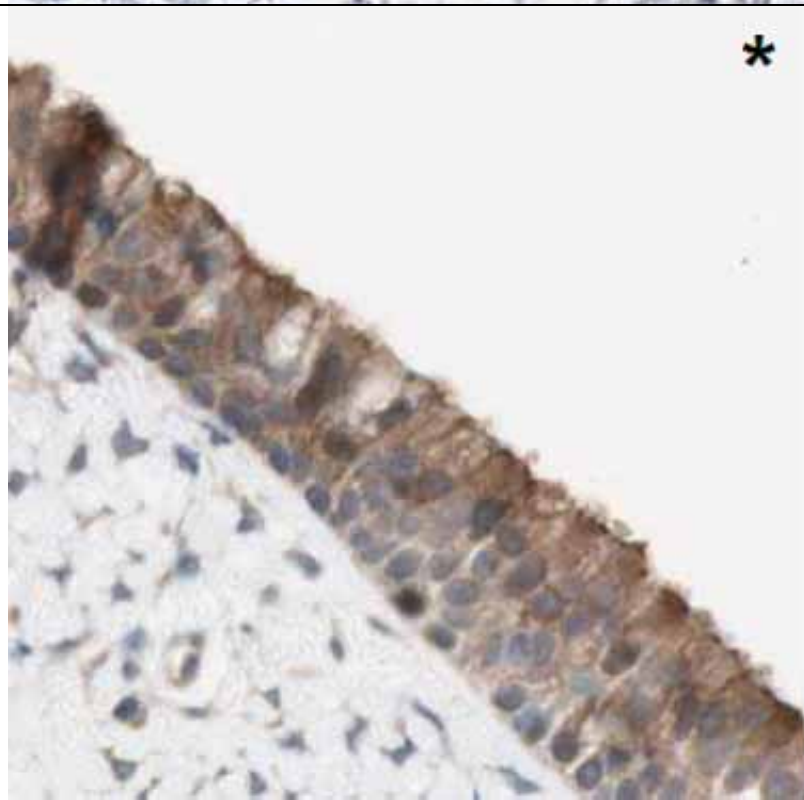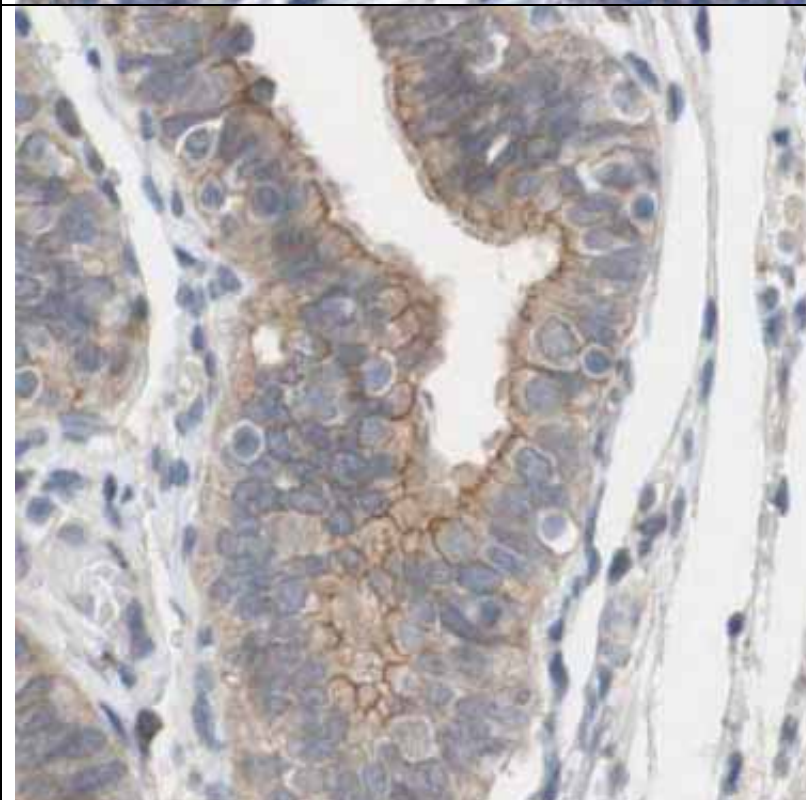

Staining is  
non-specific  
to ciliated  
cells or  
absent

C9orf103  
(antibody  
HPA020378)

Category 3

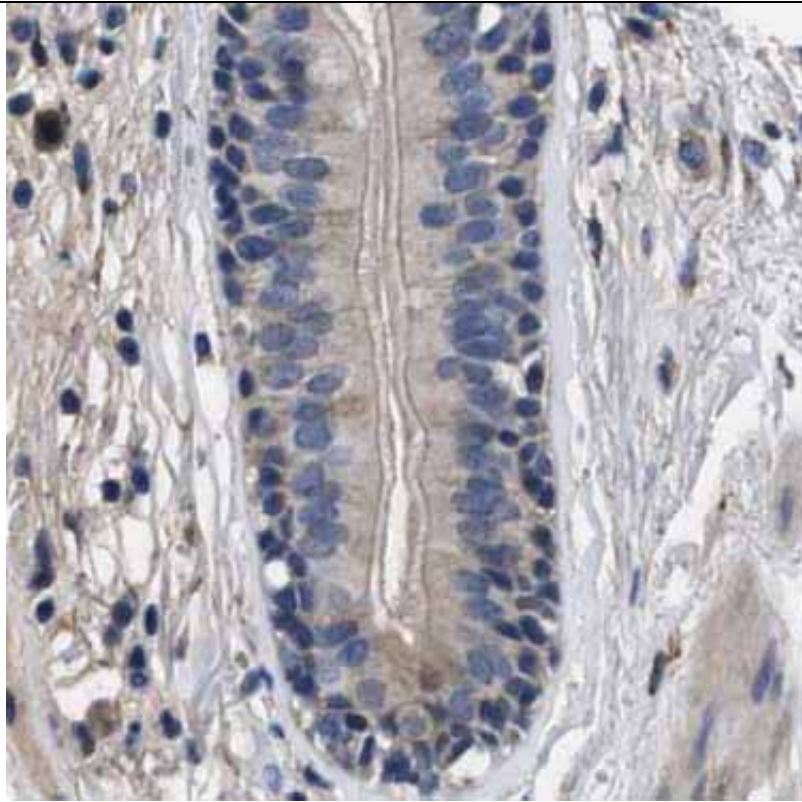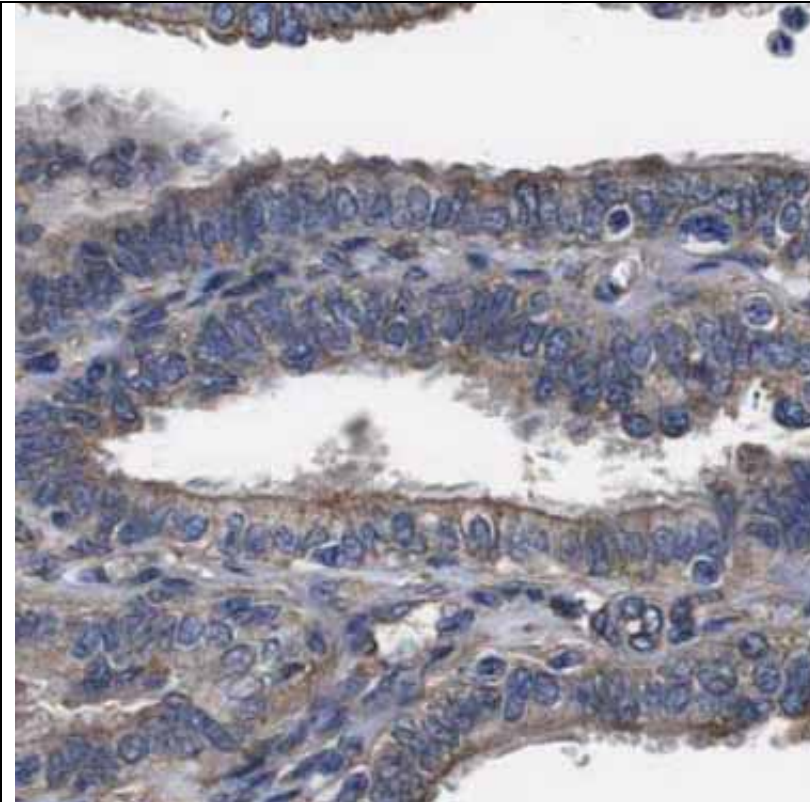

Staining is  
non-specific  
to ciliated  
cells or  
absent

C10orf57  
(antibody  
HPA009025)

Category 3

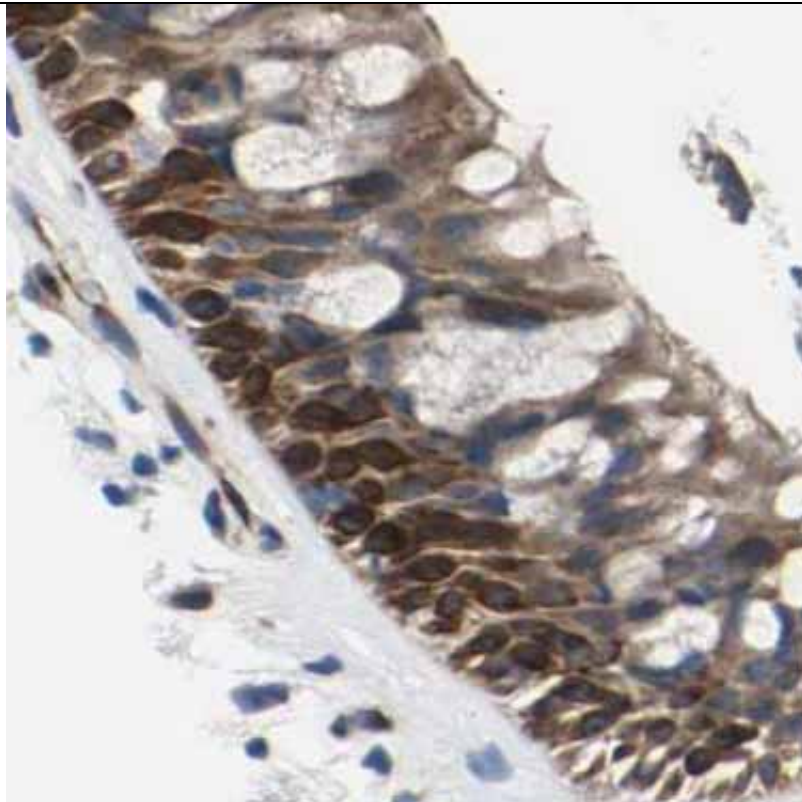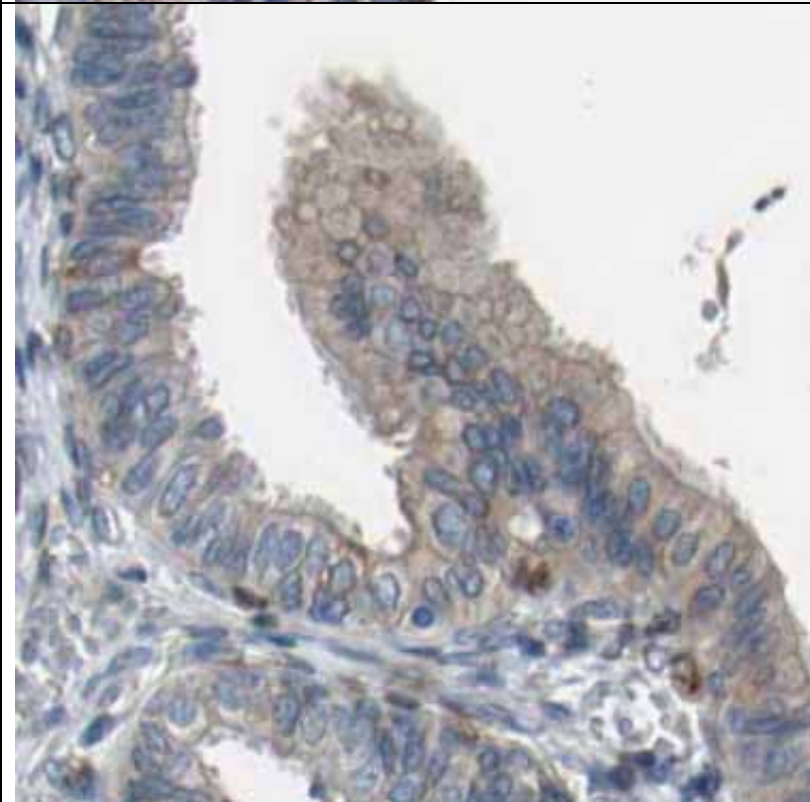

Staining is  
non-specific  
to ciliated  
cells or  
absent

FABP6  
(antibody  
HPA012601)

Category 3

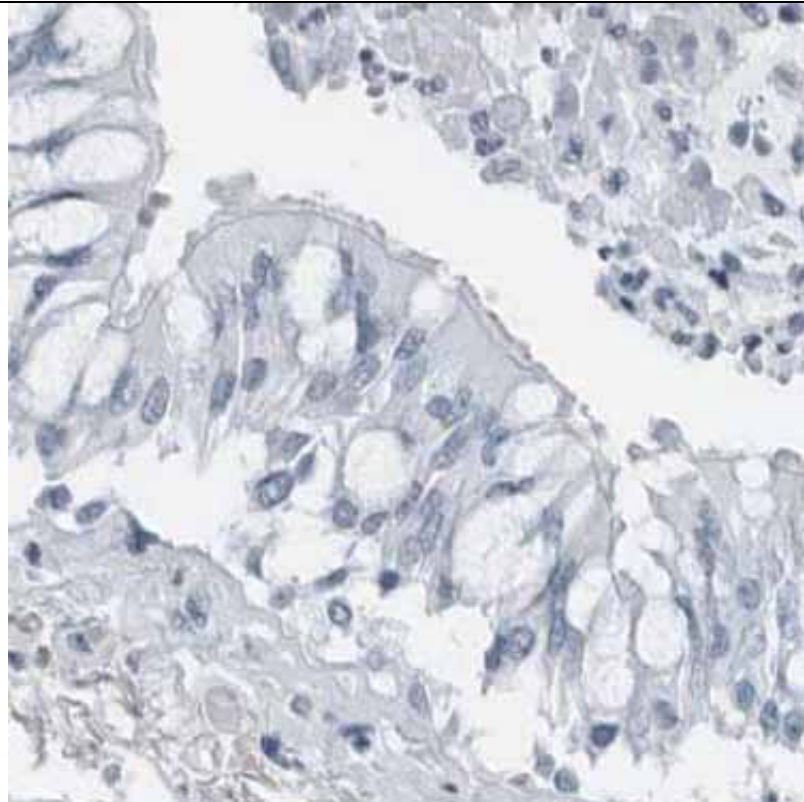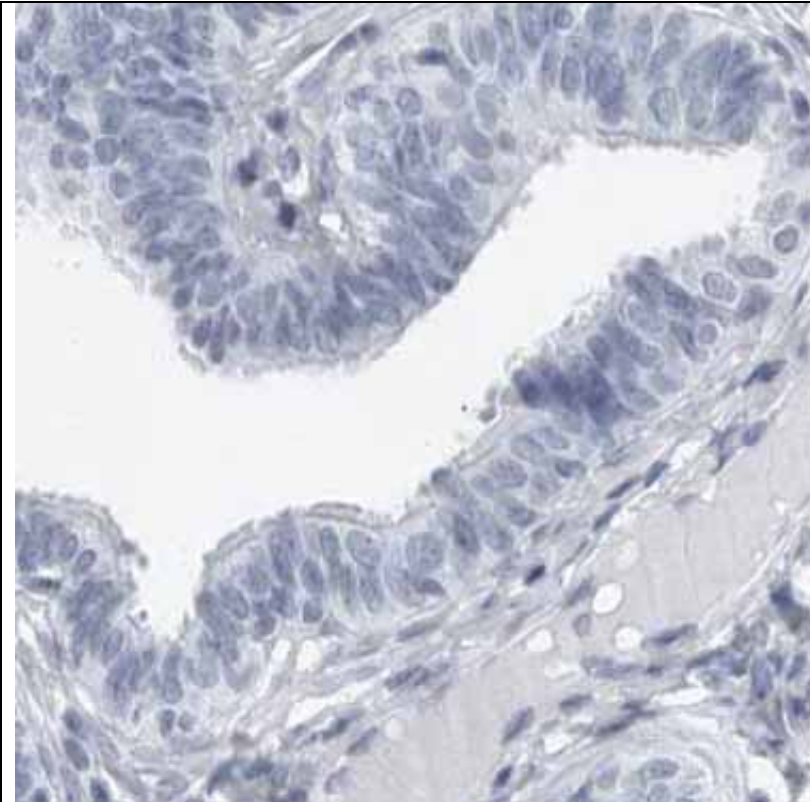

Staining is  
non-specific  
to ciliated  
cells or  
absent

FAM174A  
(antibody  
HPA019539)

Category 3

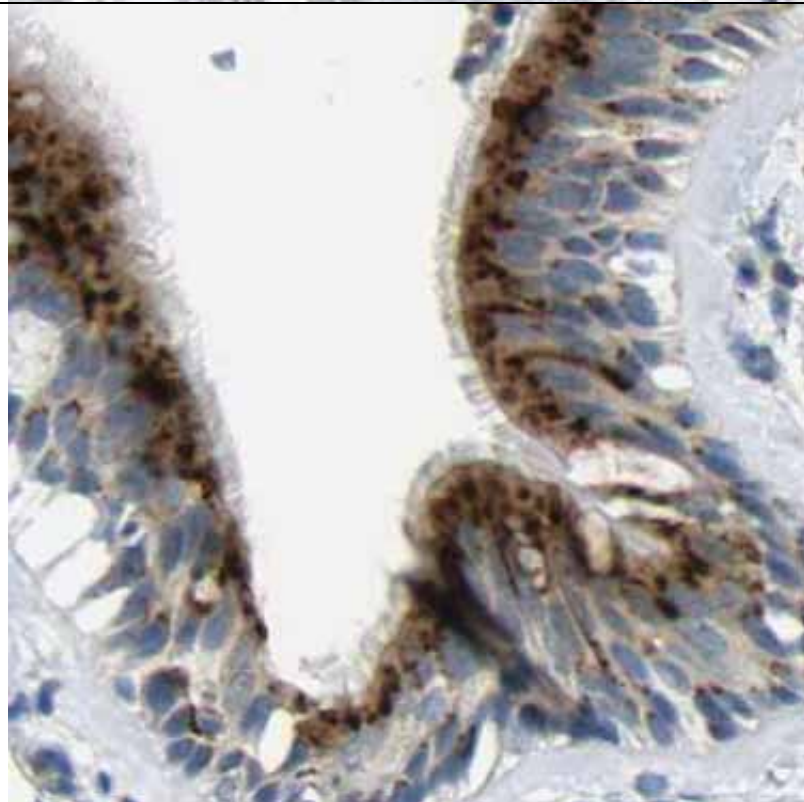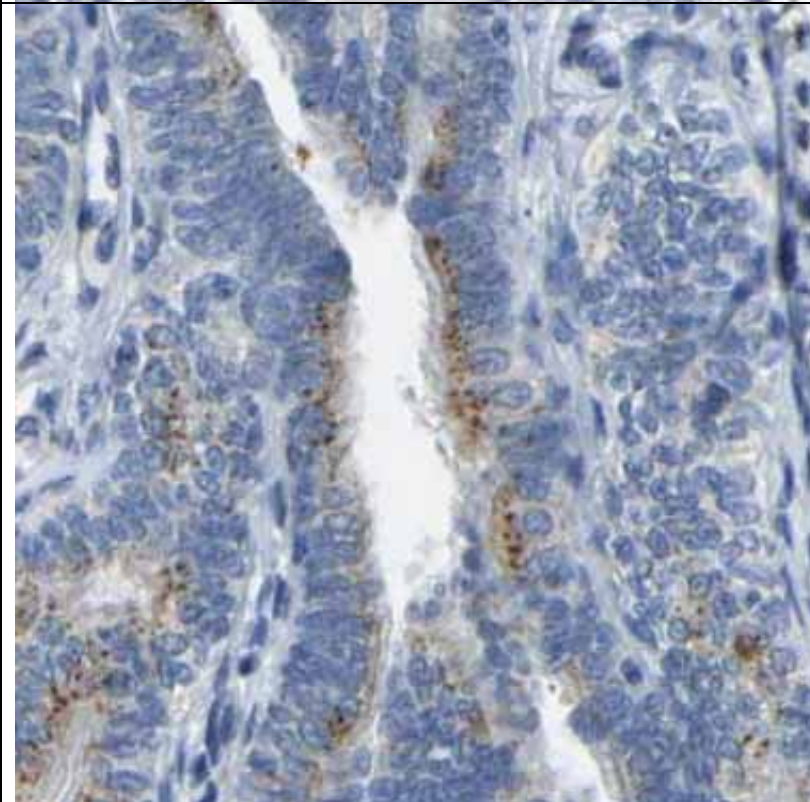

Staining is  
non-specific  
to ciliated  
cells or  
absent

GLT8D1  
(antibody  
HPA010588)

Category 3

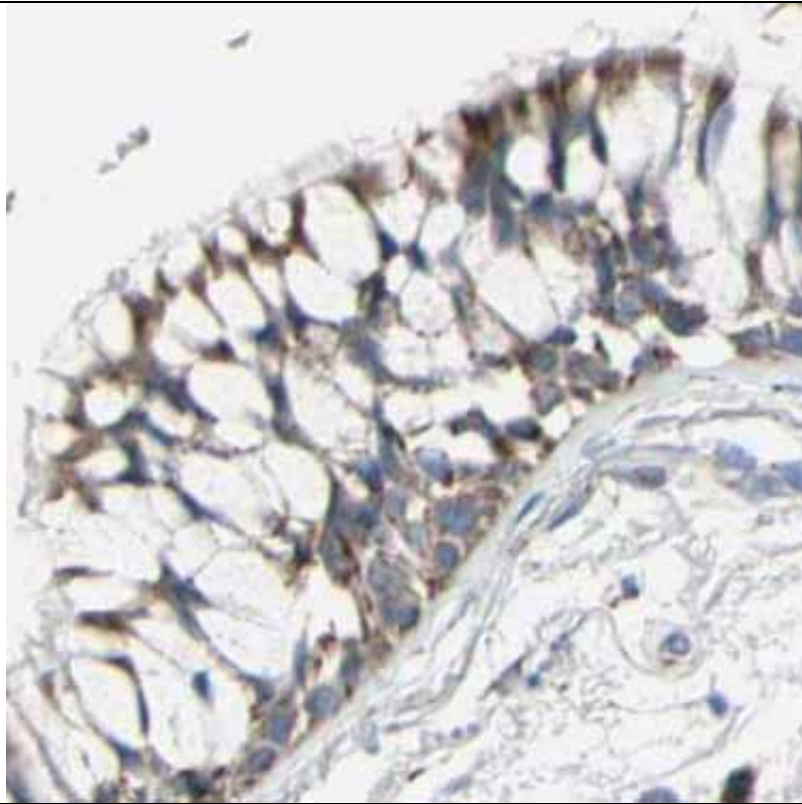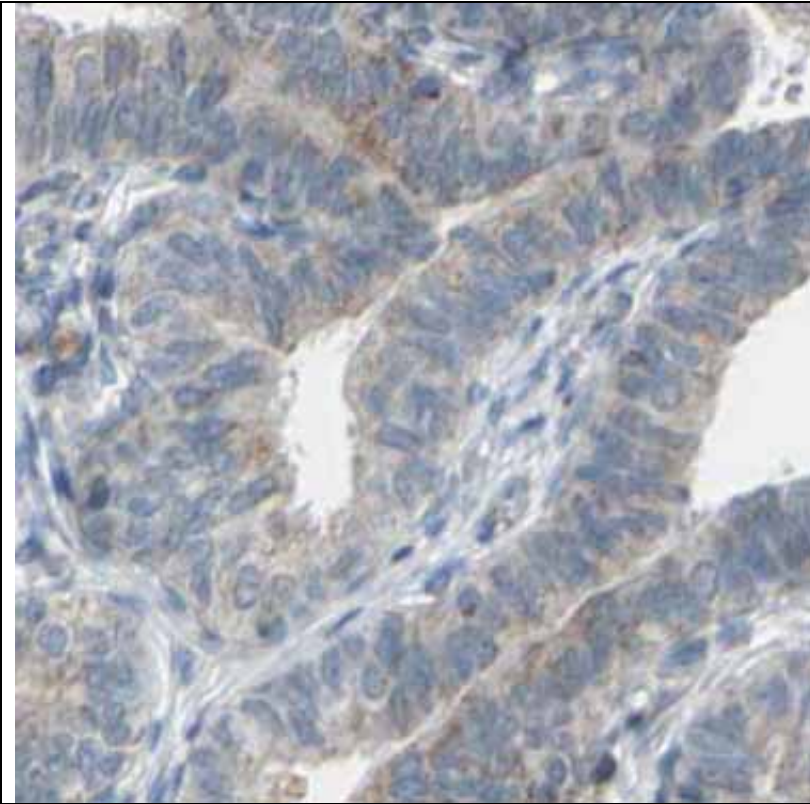

Staining is  
non-specific  
to ciliated  
cells or  
absent

GRAMD2  
(antibody  
HPA029435)

Category 3

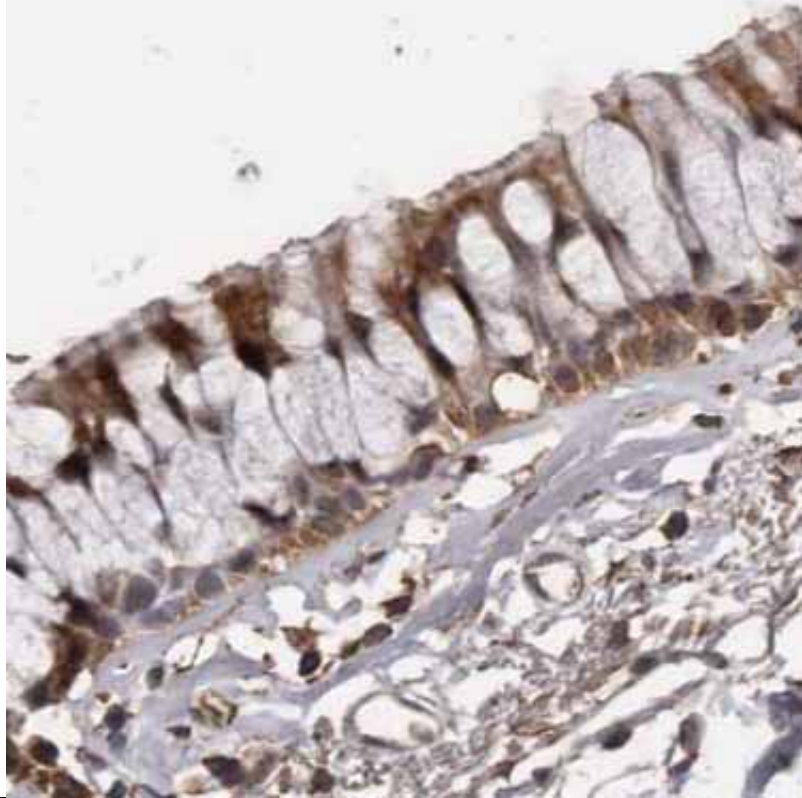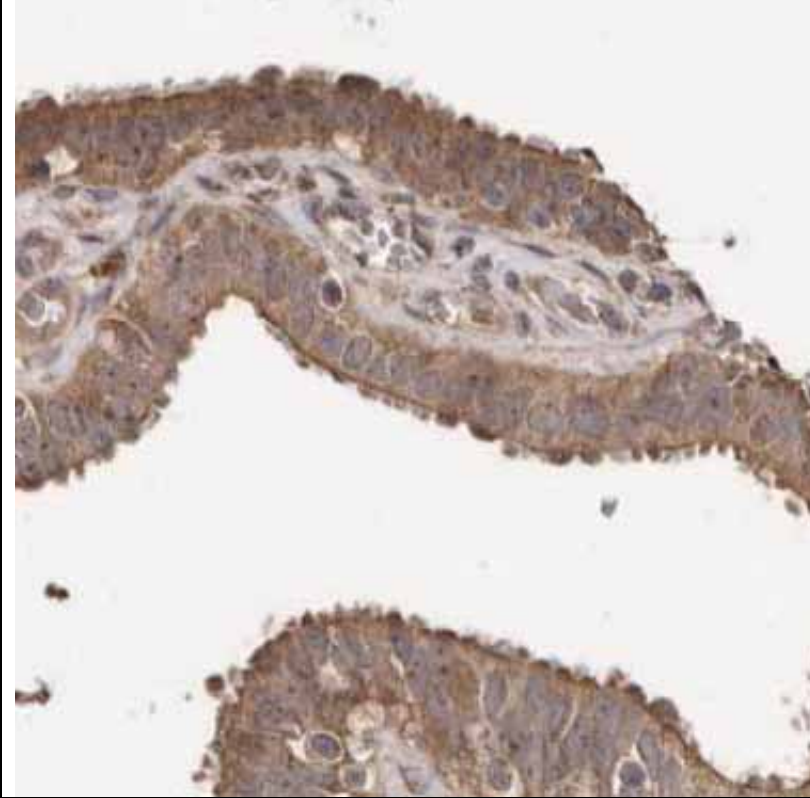

Staining is  
non-specific  
to ciliated  
cells or  
absent

IL5RA  
(antibody  
HPA013196)

Category 3

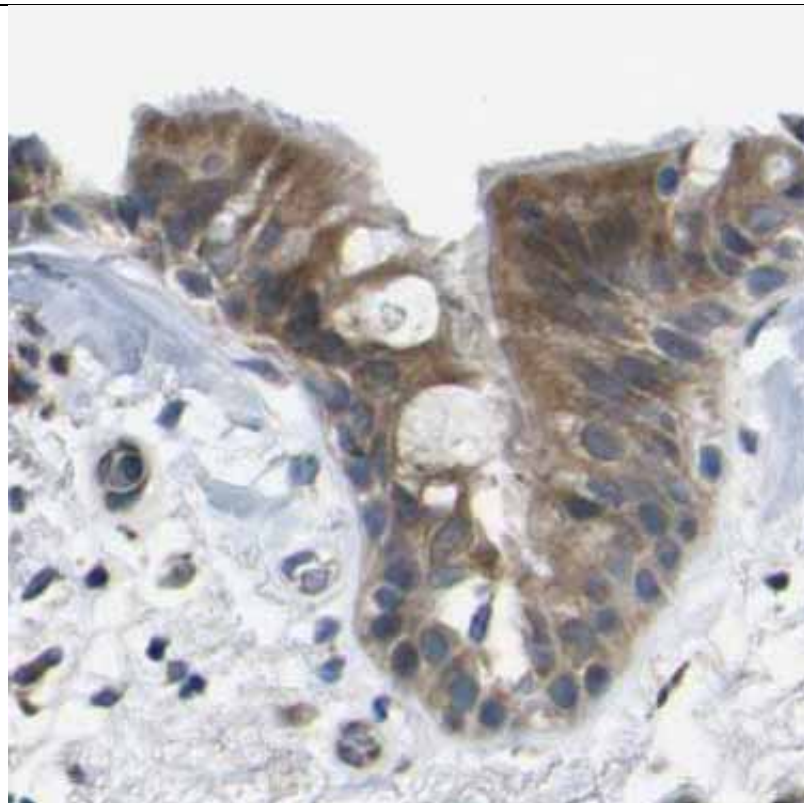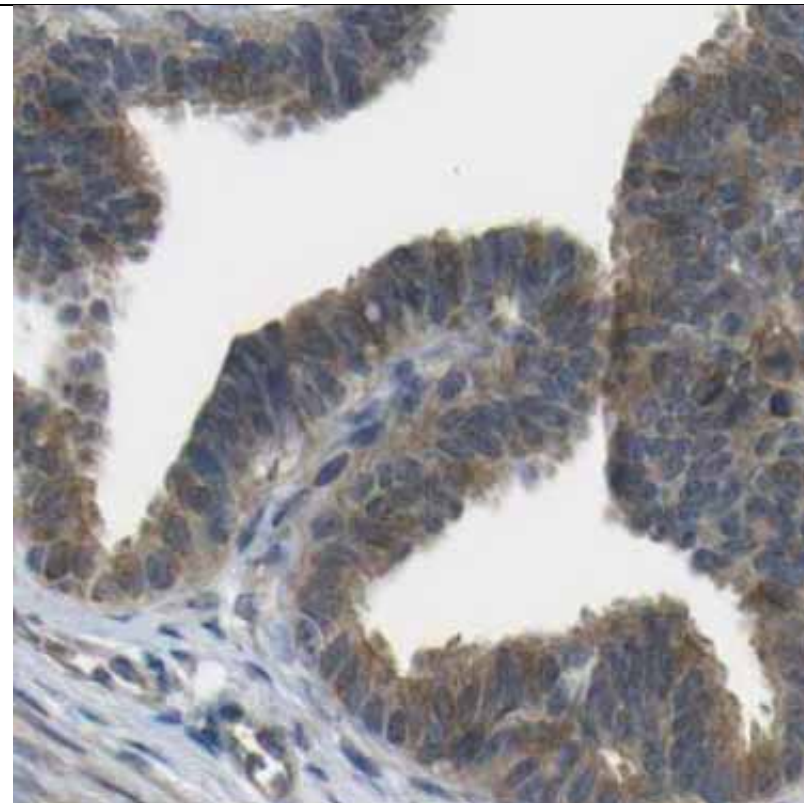

Staining is  
non-specific  
to ciliated  
cells or  
absent

KCNMB2  
(antibody  
CAB022649)

Category 3

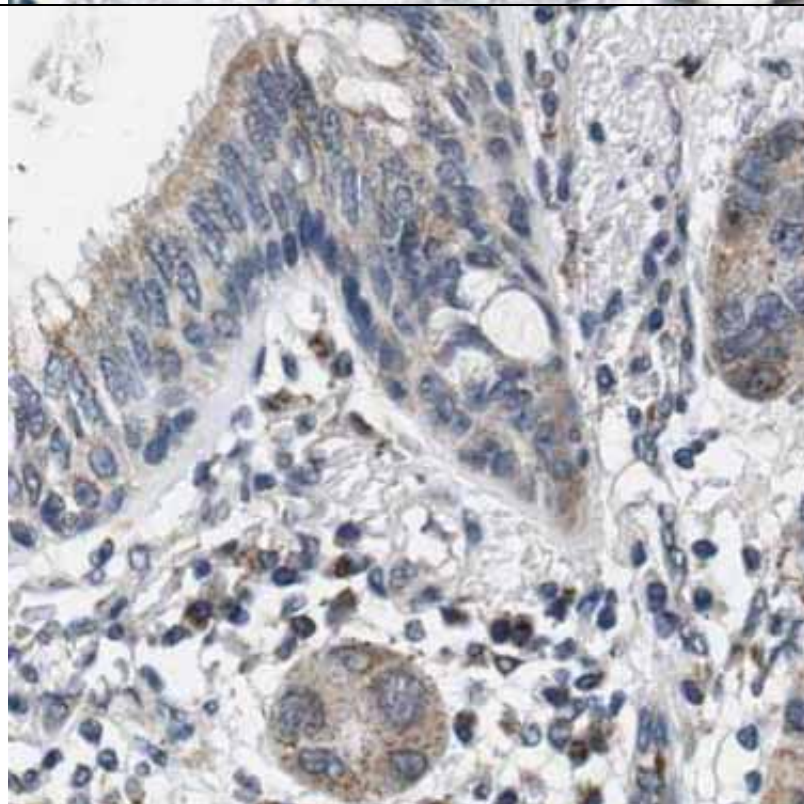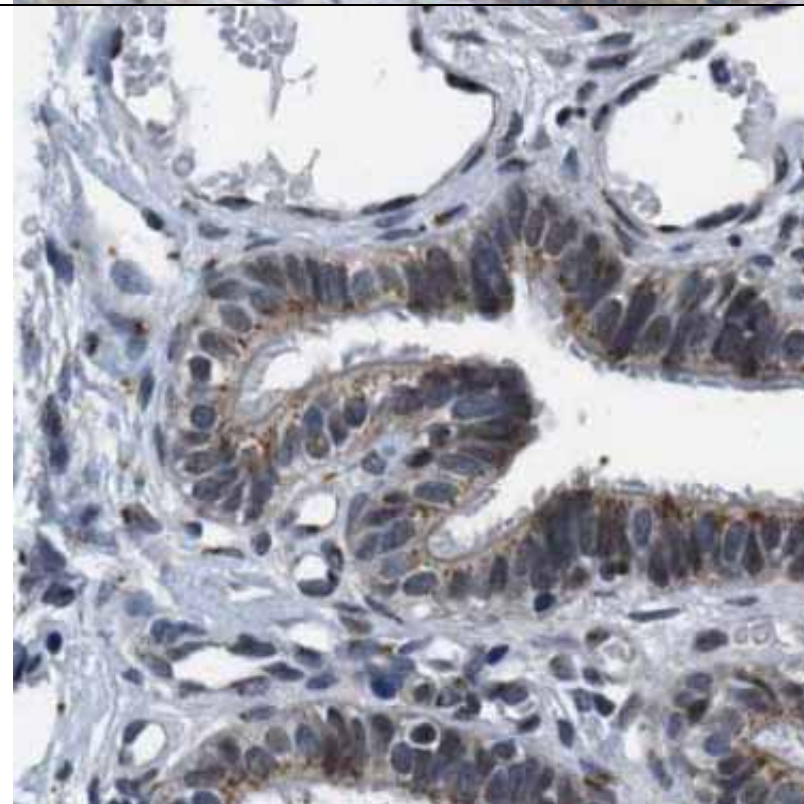

Staining is  
non-specific  
to ciliated  
cells or  
absent

KIAA0556  
(antibody  
HPA035090)

Category 3

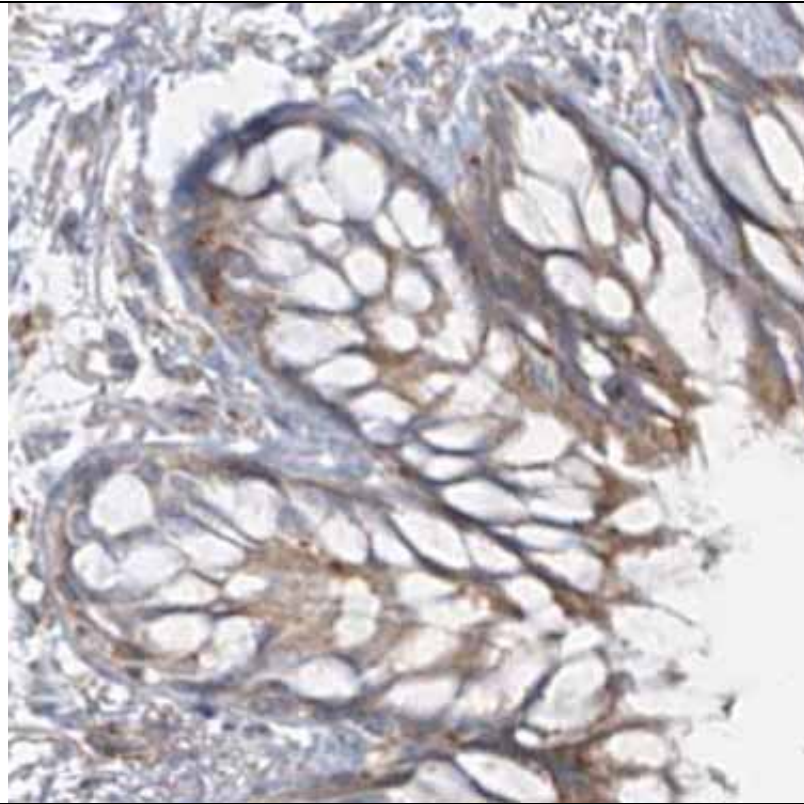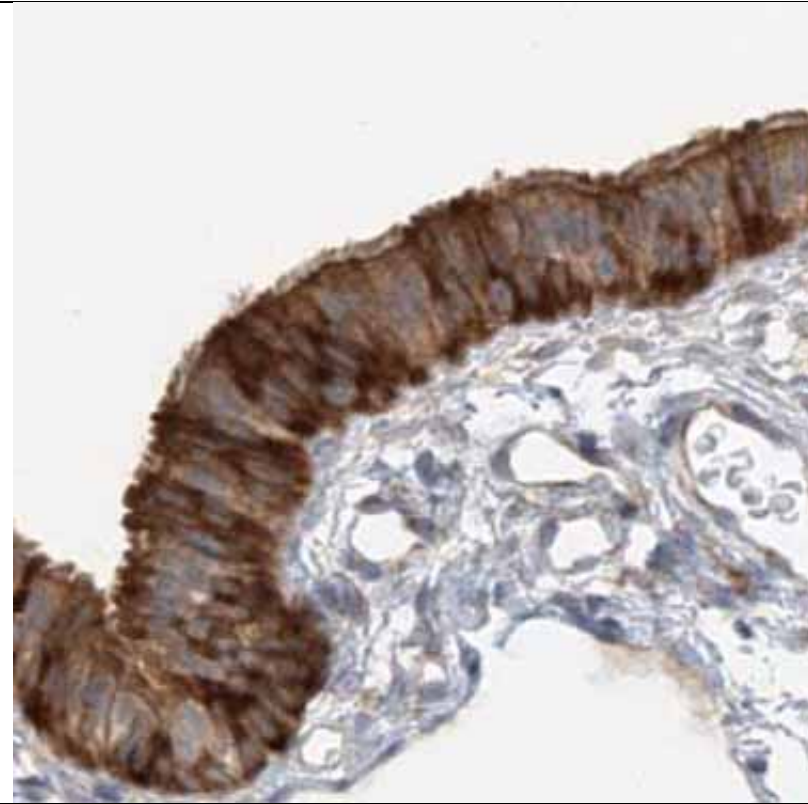

Staining is  
non-specific  
to ciliated  
cells or  
absent

LCA5L  
(antibody  
HPA019790)

Category 3

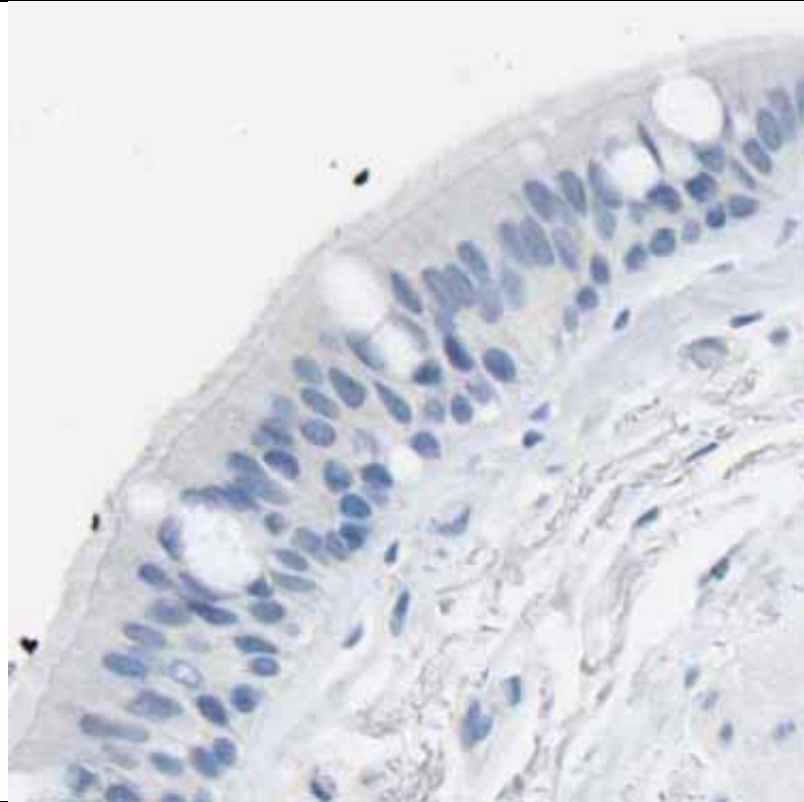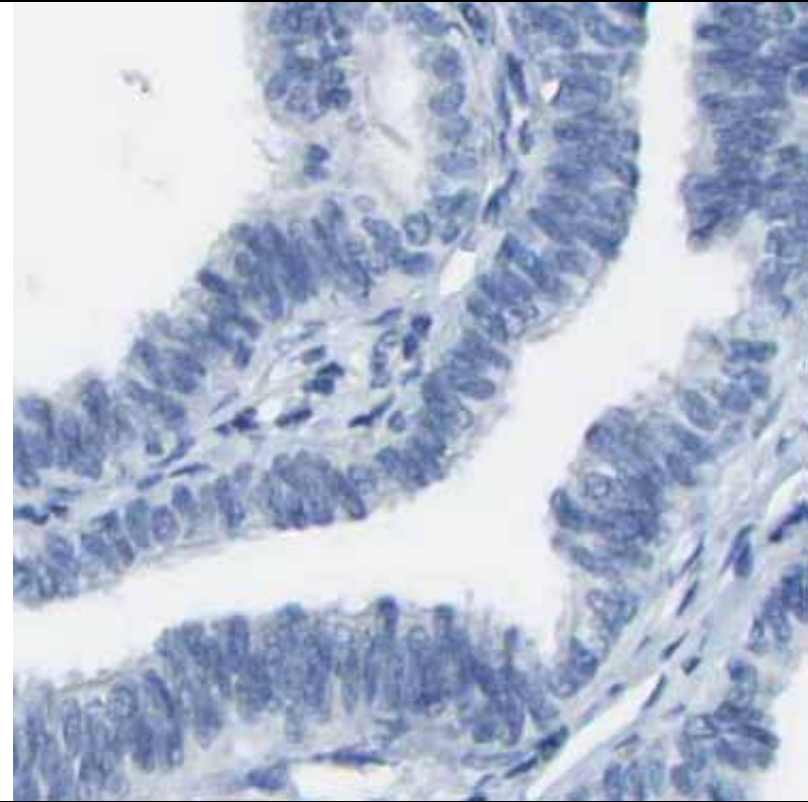

Staining is  
non-specific  
to ciliated  
cells or  
absent



MARCH10  
(antibody  
HPA023316)

Category 3

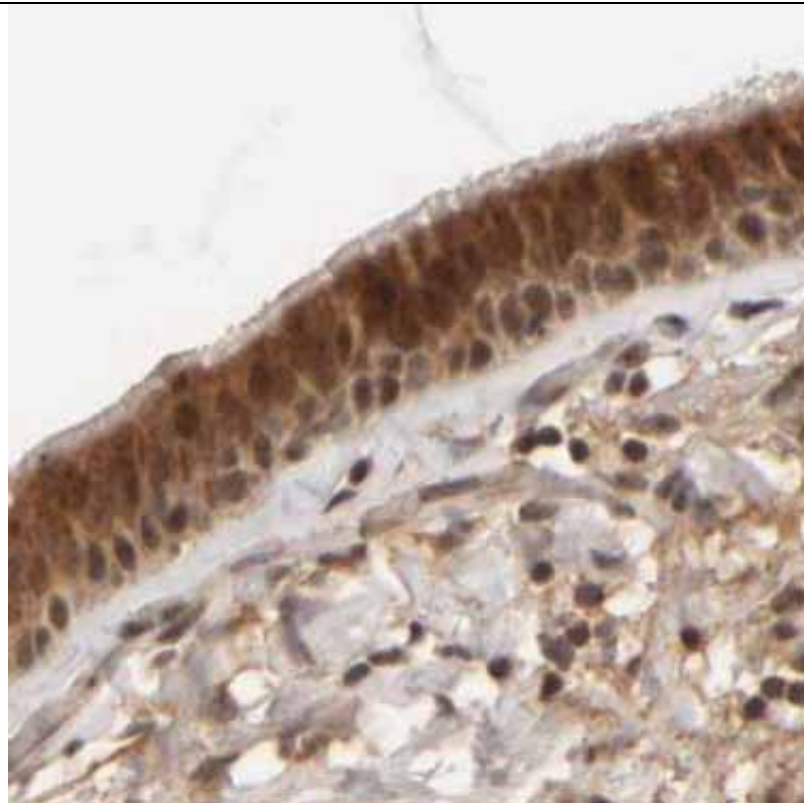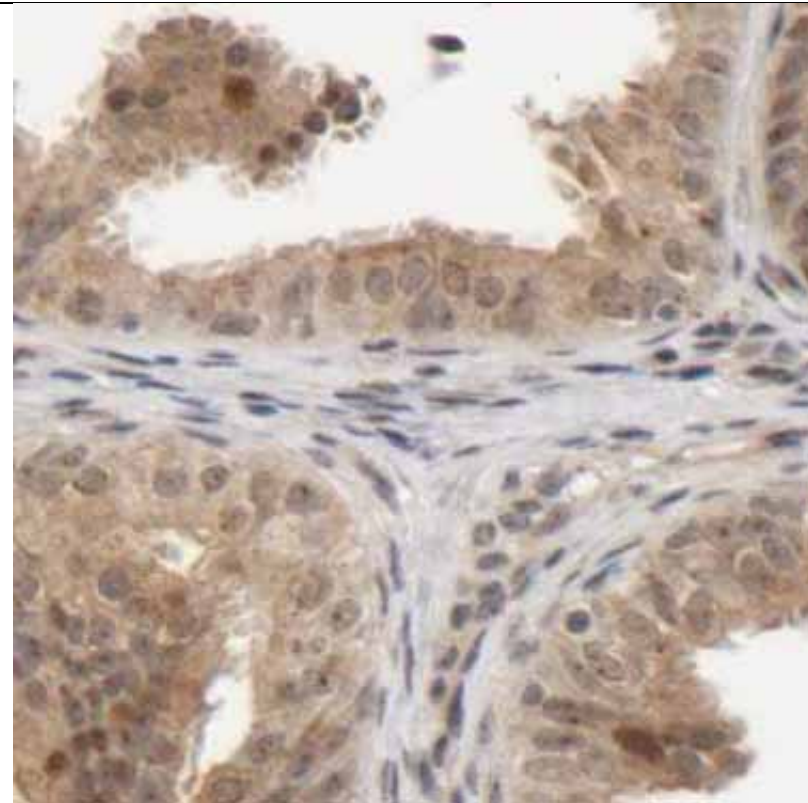

Staining is  
non-specific  
to ciliated  
cells or  
absent

NELL2  
(antibody  
HPA035715)

Category 3

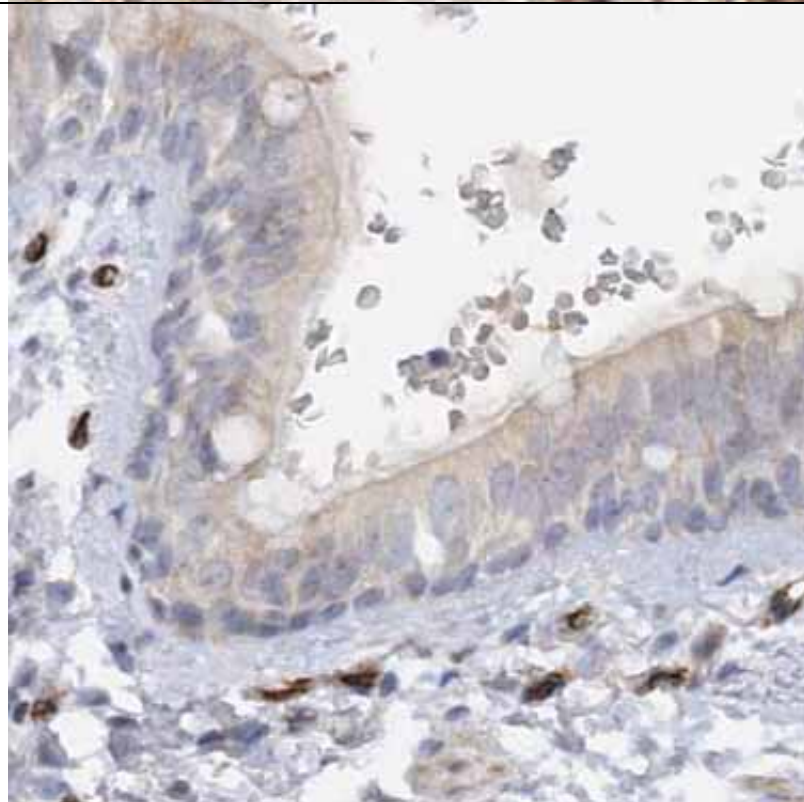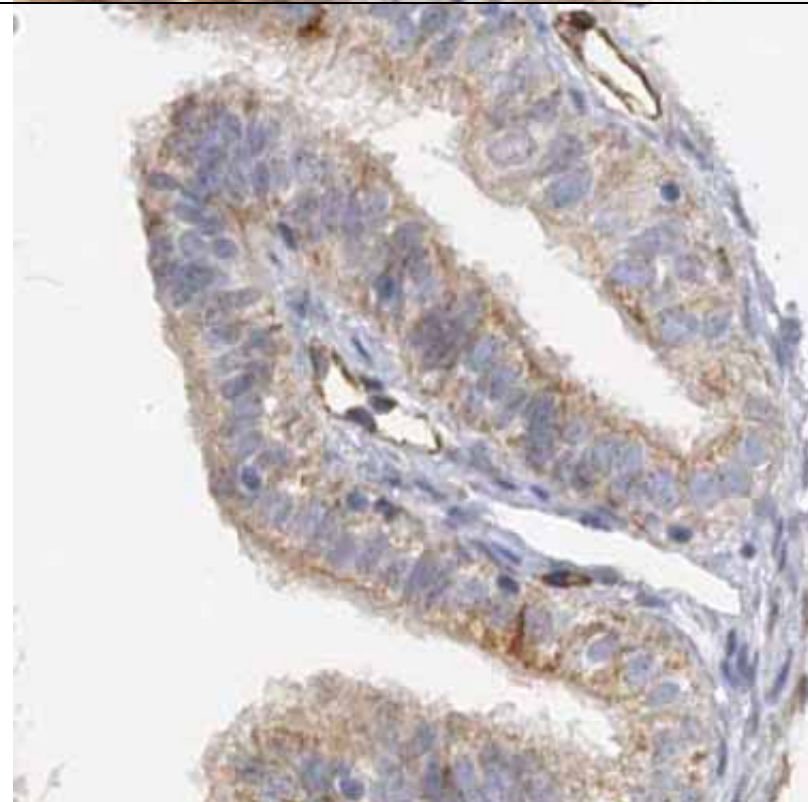

Staining is  
non-specific  
to ciliated  
cells or  
absent

PERP  
(antibody  
HPA022269)

Category 3

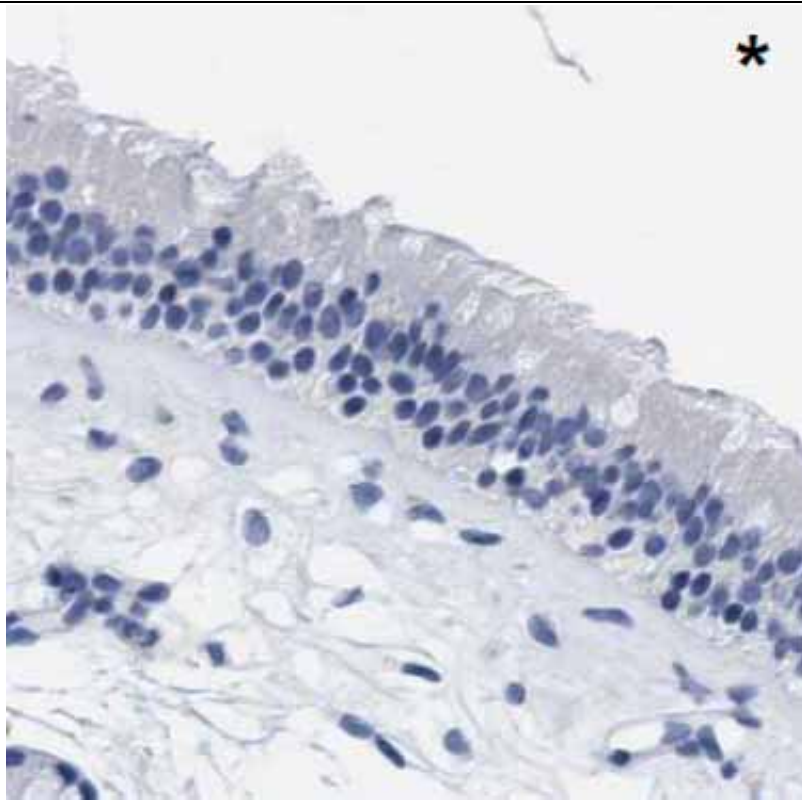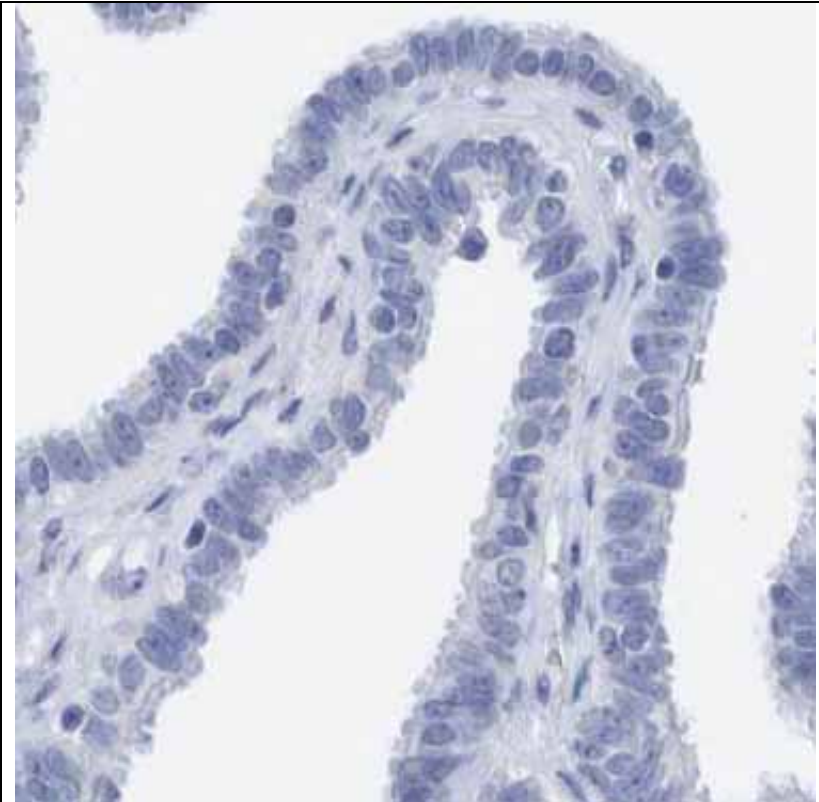

Staining is  
non-specific  
to ciliated  
cells or  
absent

SNCAIP  
(antibody  
HPA003266)

Category 3

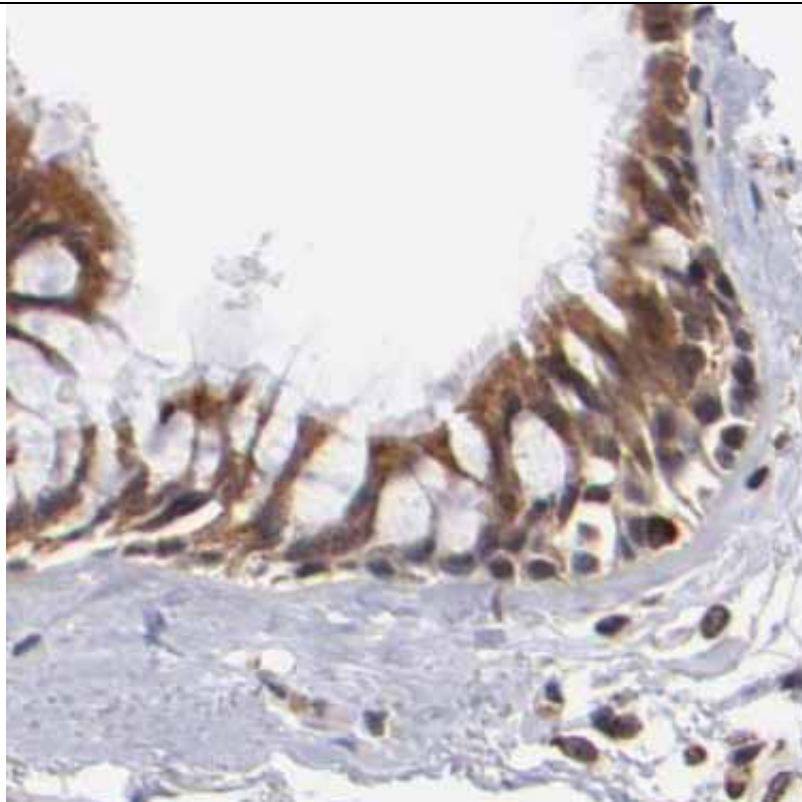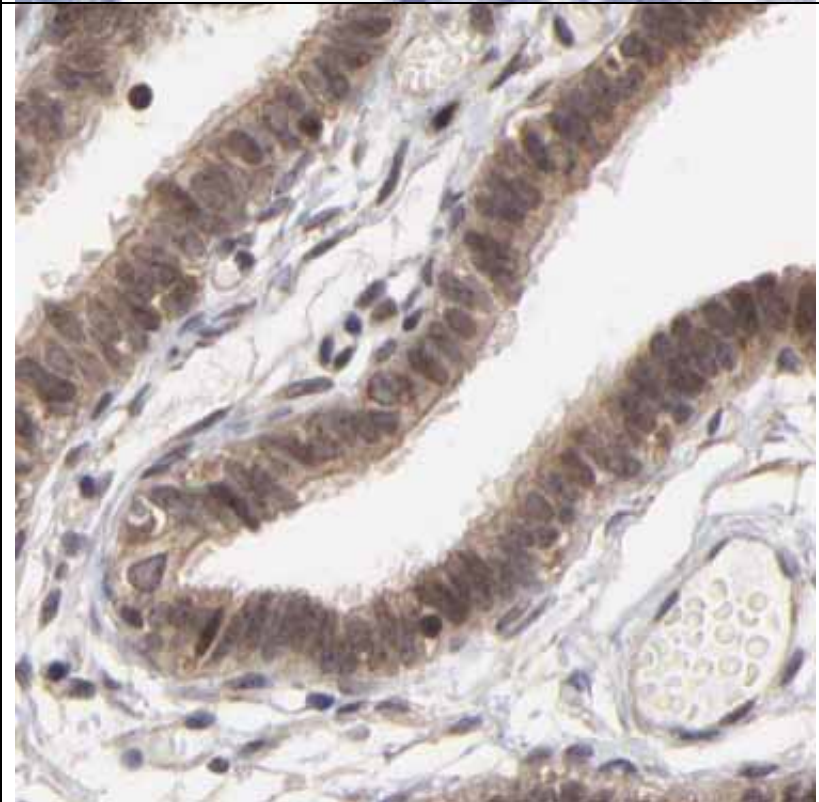

Staining is  
non-specific  
to ciliated  
cells or  
absent

TIGD4  
(antibody  
HPA035649)

Category 3

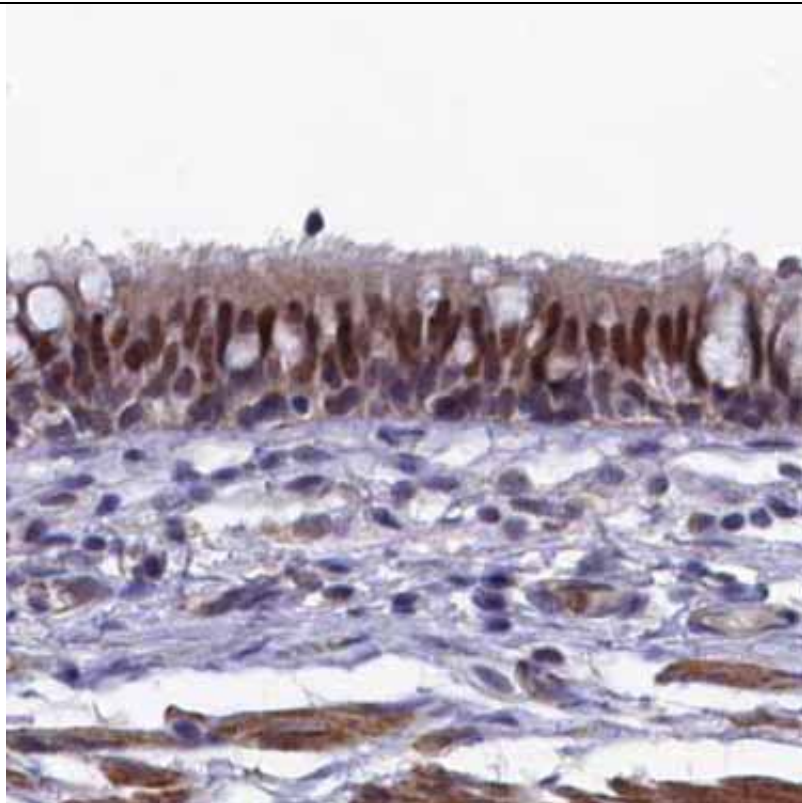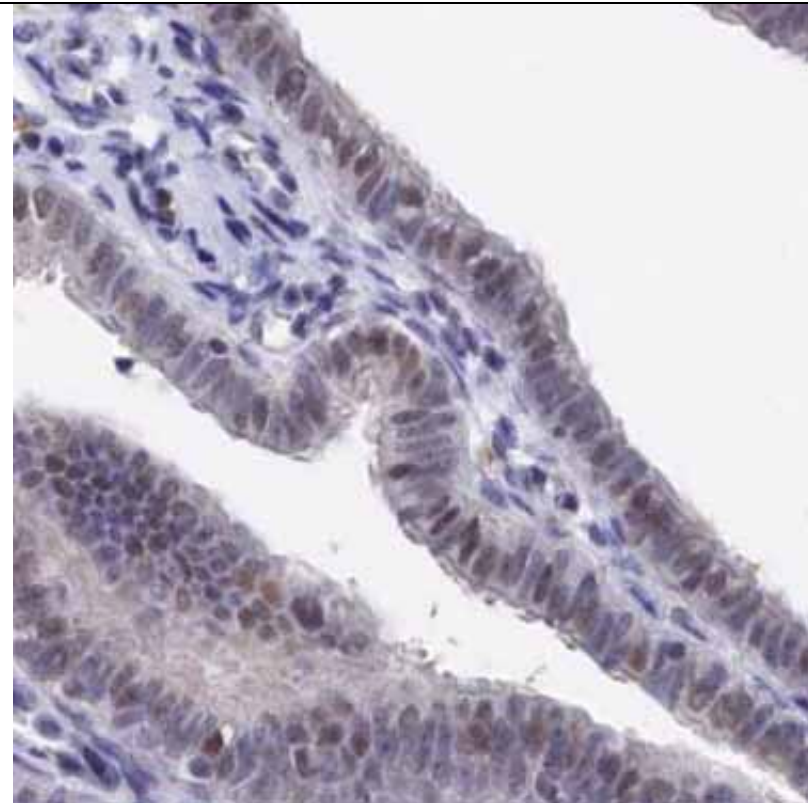

Staining is  
non-specific  
to ciliated  
cells or  
absent

TMEM146  
(antibody  
HPA024056)

Category 3

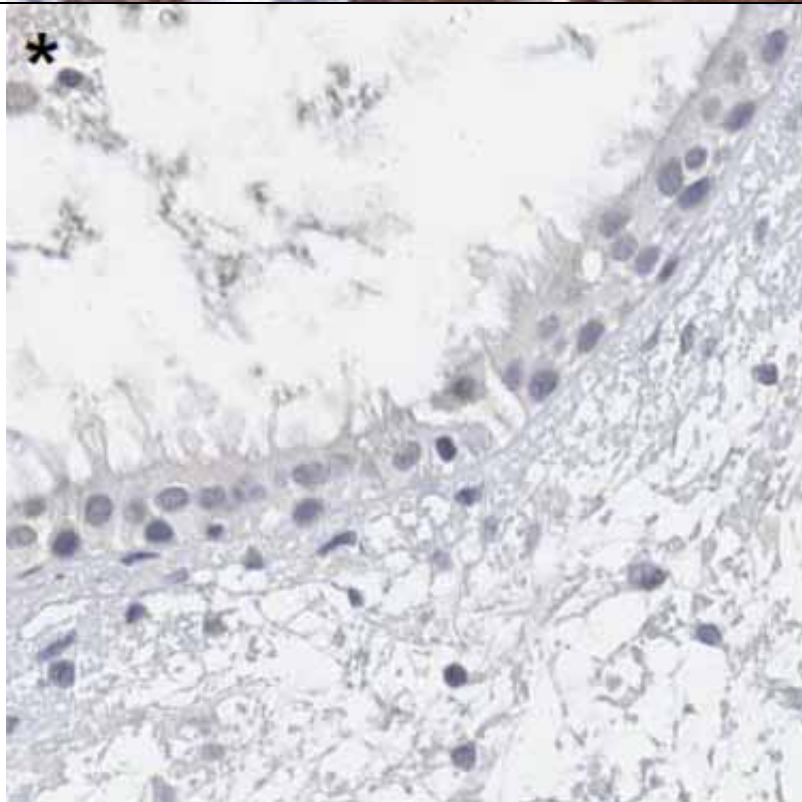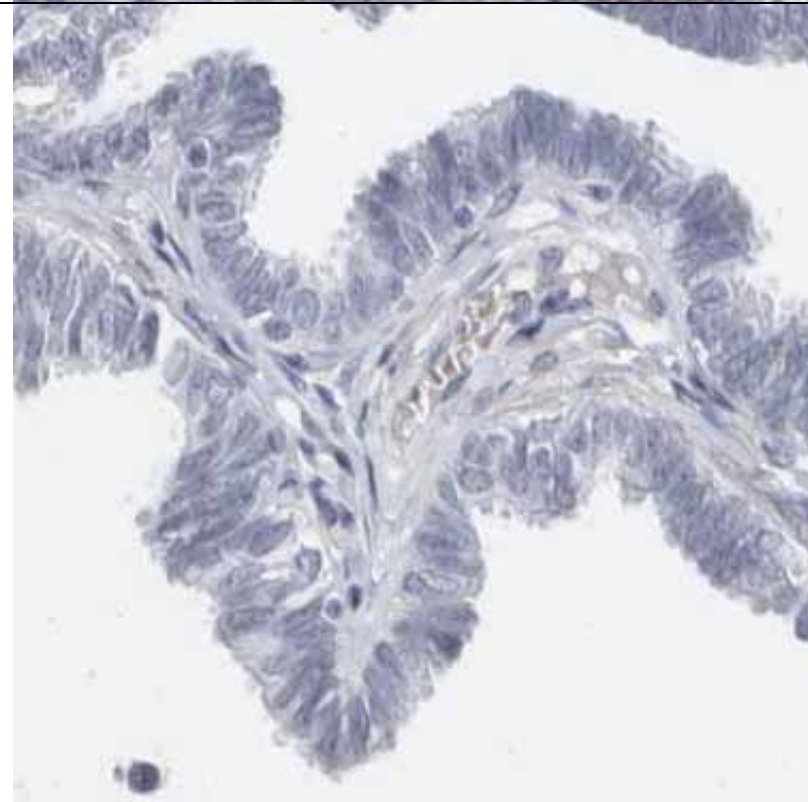

Staining is  
non-specific  
to ciliated  
cells or  
absent

TSPAN6  
(antibody  
HPA004109)

Category 3

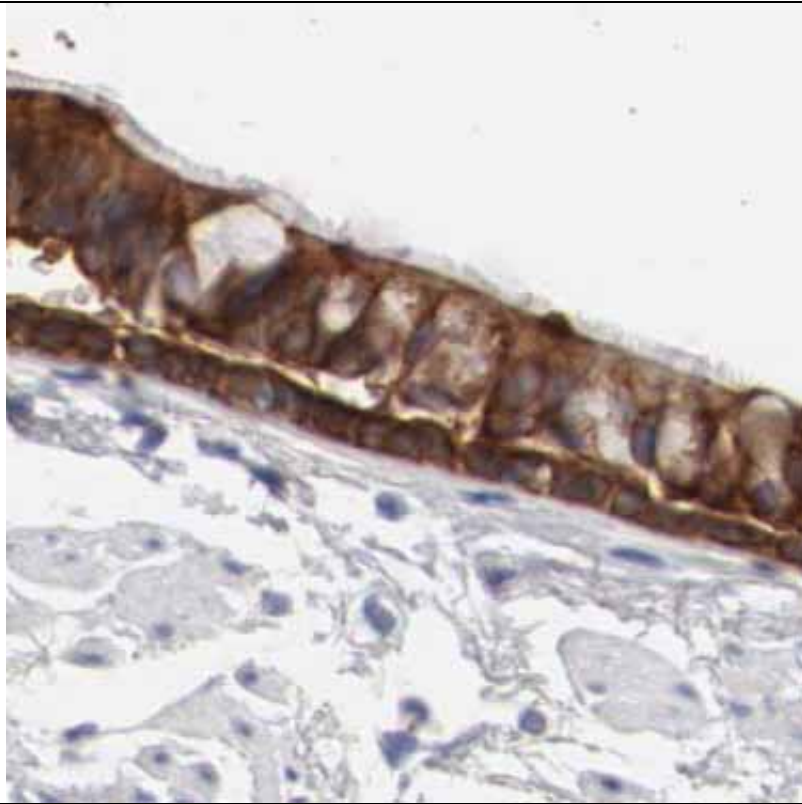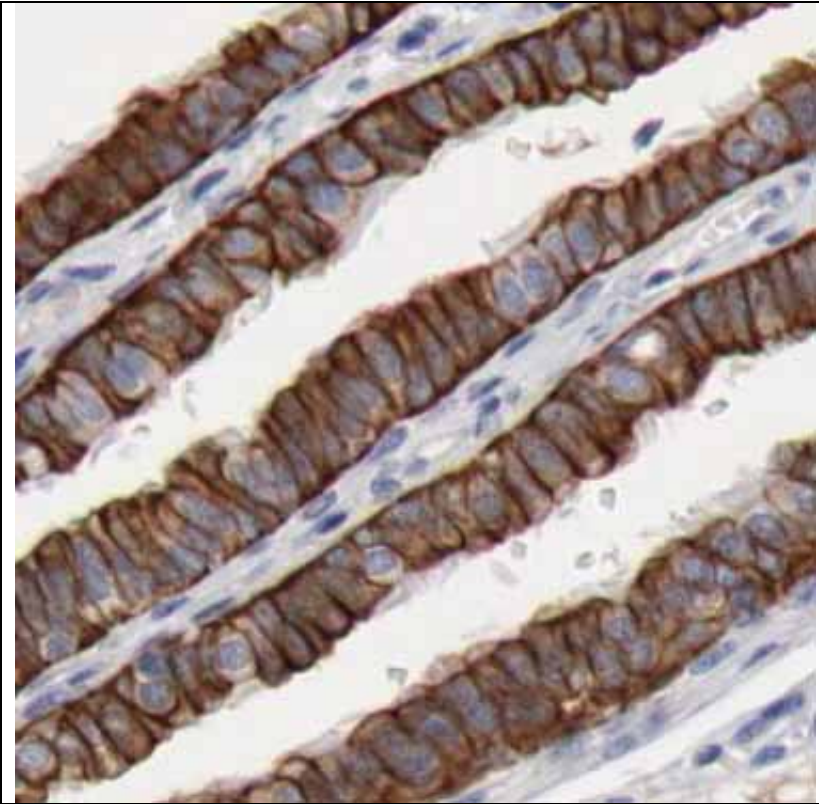

Staining is  
non-specific  
to ciliated  
cells or  
absent

ULK4  
(antibody  
HPA017930)

Category

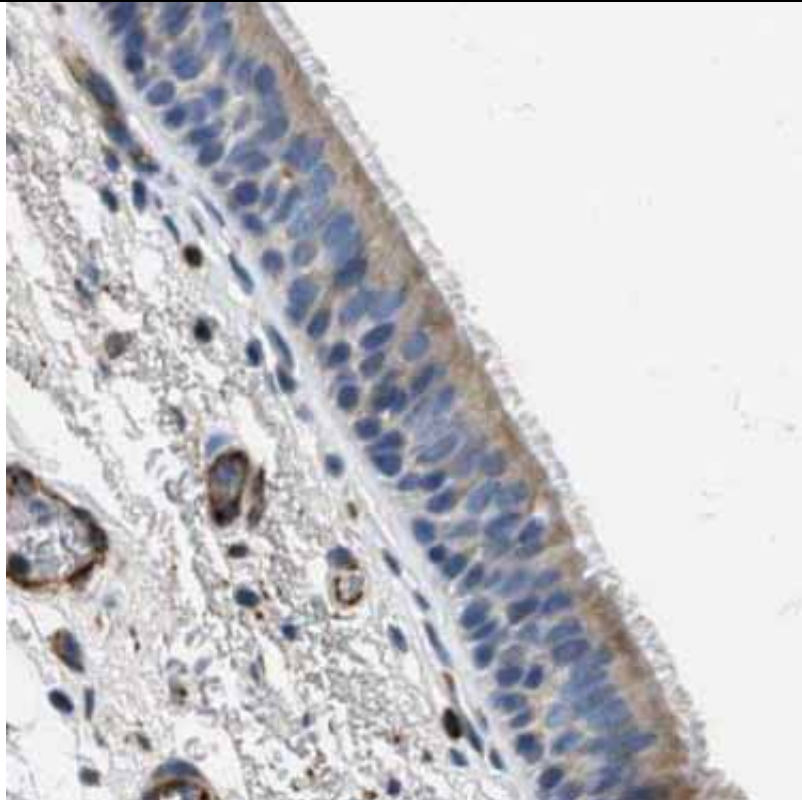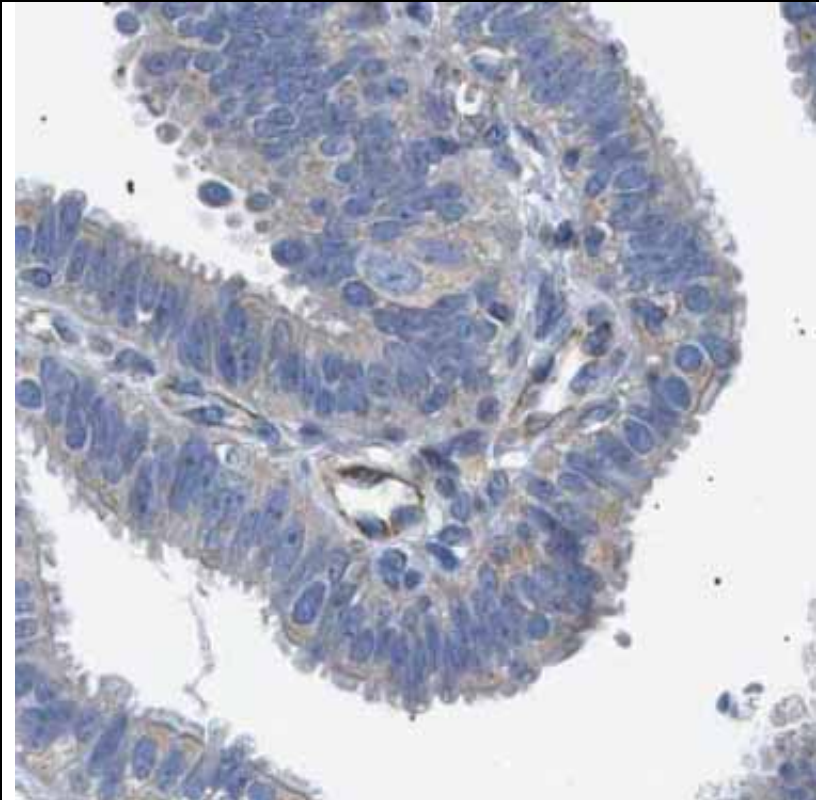

Staining is  
non-specific  
to ciliated  
cells or  
absent

WRB  
(antibody  
HPA018527)

Category 3

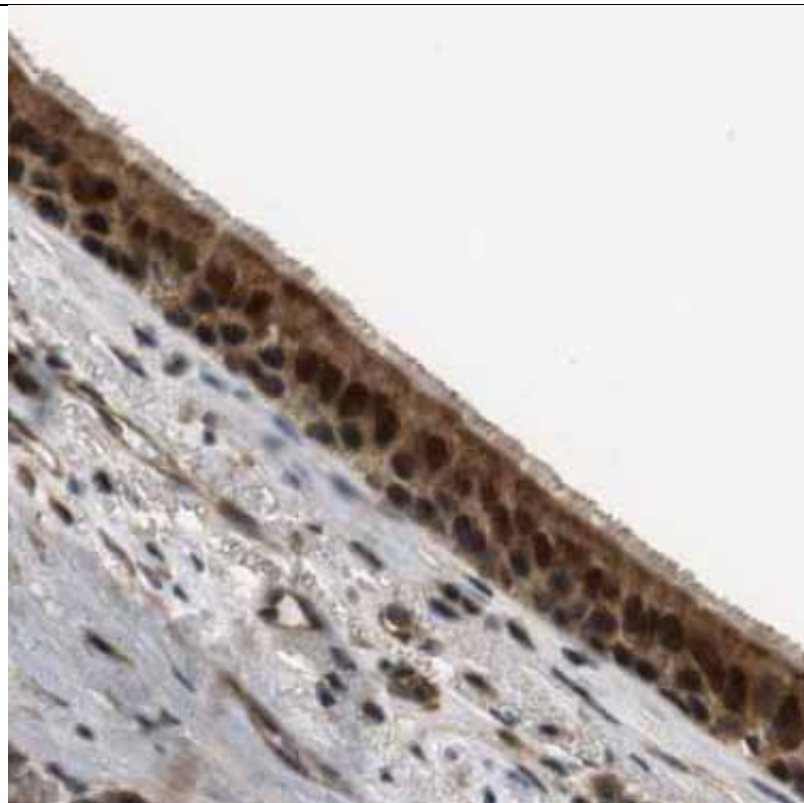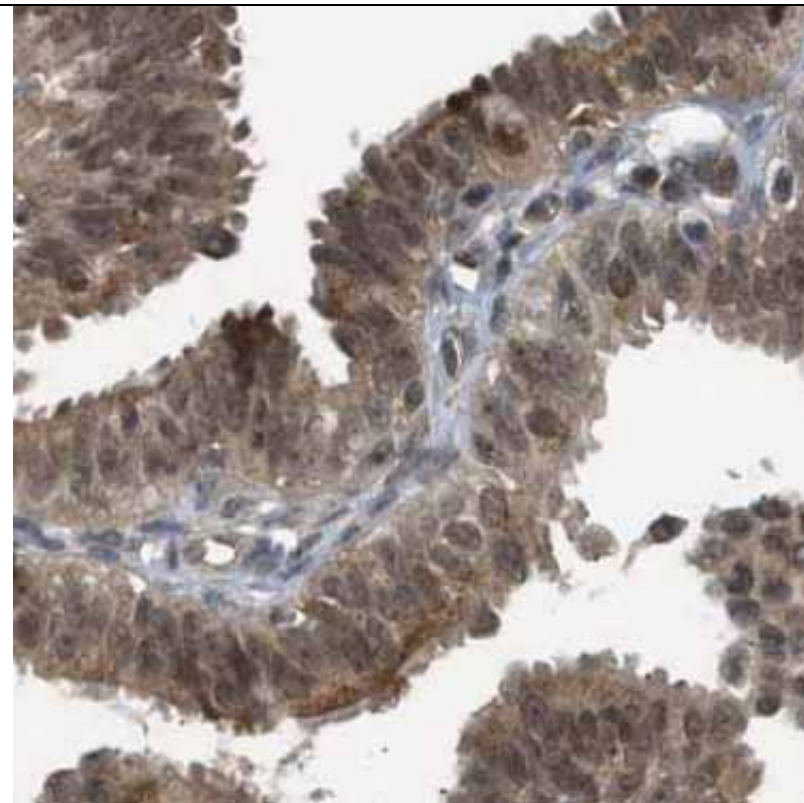

Staining is  
non-specific  
to ciliated  
cells or  
absent

XK  
(antibody  
HPA019036)

Category 3

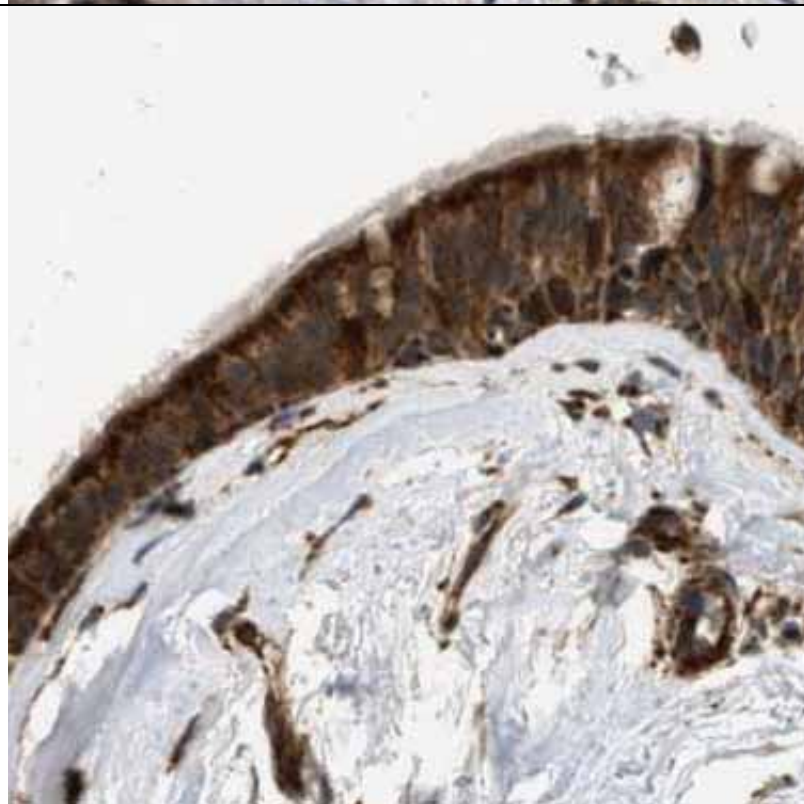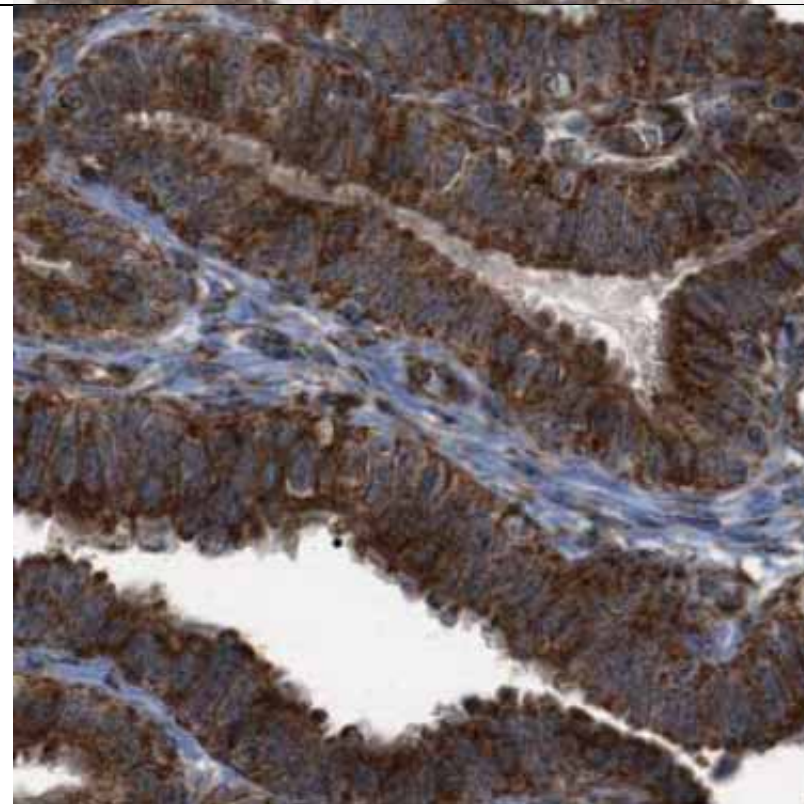

Staining is  
non-specific  
to ciliated  
cells or  
absent
